# Supplementary material for: Racial and Ethnic Disparities in Years of Potential Life Lost Attributable to COVID-19 in the United States: An Analysis of 45 States and the District of Columbia
Source: MDPI journal article supplement (doi:10.3390/ijerph18062921), 2021-03-12
Supplement: s1 [file s1]

| State | NH White                | NH Black            | Hispanic                | NH Asian            | NH AIAN           |
|-------|-------------------------|---------------------|-------------------------|---------------------|-------------------|
| US    | [1,353,819 – 1,377,390] | [775,987 – 798,111] | [1,022,177 – 1,044,441] | [128,910 – 149,805] | [68,629 – 89,077] |
| AL    | [12,949 – 14,528]       | [14,595 – 14,991]   | [1,461 – 1,580]         | [69 – 108]          | [35 – 71]         |
| AZ    | [10,192 – 12,752]       | [1,543 – 2,205]     | [22,176 – 23,145]       | [495 – 1,122]       | [11,318 – 12,136] |
| AR    | [7,488 – 8,609]         | [3,142 – 3,316]     | [1,307 – 1,416]         | [36 – 54]           | [12 – 28]         |
| CA    | [21,213 – 21,950]       | [10,197 – 10,756]   | [99,053 – 100,254]      | [10,366 – 10,915]   | [366 – 673]       |
| CO    | [5,770 – 7,556]         | [1,084 – 1,208]     | [6,731 – 7,006]         | [510 – 613]         | [305 – 386]       |
| CT    | [6,831 – 8,202]         | [3,567 – 3,823]     | [3,427 – 3,658]         | [275 – 380]         | [0 – 61]          |
| DE    | [1,554 – 3,078]         | [1,064 – 1,173]     | [203 – 246]             | [10 – 20]           | [10 – 20]         |
| DC    | [281 – 834]             | [4,287 – 4,493]     | [1,937 – 2,056]         | [78 – 101]          | [10 – 20]         |
| FL    | [29,642 – 31,306]       | [28,728 – 29,256]   | [30,640 – 31,194]       | [1,425 – 1,554]     | [132 – 164]       |
| GA    | [17,140 – 18,586]       | [26,052 – 26,563]   | [7,388 – 7,629]         | [678 – 774]         | [30 – 40]         |
| ID    | [2,392 – 3,709]         | [22 – 45]           | [904 – 1,009]           | [56 – 81]           | [35 – 62]         |
| IL    | [20,147 – 22,899]       | [18,922 – 19,553]   | [25,097 – 25,735]       | [2,152 – 2,505]     | [36 – 264]        |
| IN    | [17,084 – 19,503]       | [5,192 – 5,477]     | [2,759 – 2,956]         | [196 – 272]         | [22 – 75]         |
| IA    | [9,235 – 10,388]        | [794 – 876]         | [1,185 – 1,289]         | [126 – 174]         | [79 – 101]        |
| KS    | [4,969 – 6,759]         | [937 – 1,116]       | [1,983 – 2,195]         | [79 – 185]          | [164 – 289]       |
| KY    | [8,828 – 10,170]        | [1,716 – 1,872]     | [1,077 – 1,166]         | [69 – 97]           | [0 – 18]          |
| LA    | [10,948 – 12,032]       | [20,822 – 21,299]   | [1,329 – 1,465]         | [161 – 231]         | [55 – 108]        |
| MD    | [6,218 – 7,490]         | [12,981 – 13,365]   | [7,827 – 8,087]         | [639 – 760]         | [23 – 61]         |
| MA    | [13,739 – 15,762]       | [3,919 – 4,439]     | [4,211 – 4,713]         | [889 – 1,310]       | [22 – 362]        |
| MI    | [21,204 – 22,771]       | [20,378 – 21,232]   | [2,958 – 3,515]         | [245 – 718]         | [132 – 583]       |
| MN    | [7,429 – 8,598]         | [1,961 – 2,102]     | [1,367 – 1,481]         | [1,221 – 1,337]     | [311 – 375]       |
| MS    | [8,499 – 9,493]         | [14,968 – 15,369]   | [324 – 401]             | [88 – 158]          | [1,346 – 1,469]   |
| MO    | [14,636 – 16,458]       | [4,606 – 4,843]     | [1,619 – 1,739]         | [139 – 198]         | [35 – 61]         |
| MT    | [1,852 – 2,651]         | [55 – 75]           | [105 – 144]             | [32 – 48]           | [1,577 – 1,700]   |
| NE    | [4,101 – 5,551]         | [413 – 494]         | [1,464 – 1,592]         | [55 – 91]           | [55 – 91]         |
| NV    | [4,195 – 5,523]         | [2,084 – 2,235]     | [7,731 – 7,987]         | [1,325 – 1,466]     | [150 – 191]       |
| NH    | [802 – 2,143]           | [36 – 70]           | [12 – 45]               | [32 – 65]           | [0 – 20]          |
| NJ    | [25,477 – 26,484]       | [20,227 – 20,706]   | [33,258 – 33,791]       | [5,013 – 5,263]     | [79 – 101]        |
| NM    | [1,242 – 2,532]         | [69 – 91]           | [4,434 – 4,644]         | [12 – 28]           | [7,232 – 7,464]   |
| NY    | [47,678 – 59,498]       | [55,669 – 62,238]   | [76,085 – 82,646]       | [17,130 – 23,324]   | [79 – 5,966]      |
| NC    | [5,979 – 7,035]         | [6,641 – 6,944]     | [4,017 – 4,244]         | [190 – 285]         | [79 – 167]        |
| ND    | [2,040 – 3,475]         | [22 – 61]           | [123 – 170]             | [0 – 34]            | [632 – 729]       |
| OH    | [20,730 – 21,718]       | [7,029 – 7,302]     | [1,175 – 1,279]         | [329 – 394]         | [36 – 55]         |
| OK    | [6,304 – 8,532]         | [897 – 1,003]       | [1,548 – 1,669]         | [104 – 147]         | [2,137 – 2,292]   |
| OR    | [2,119 – 2,609]         | [113 – 144]         | [1,640 – 1,761]         | [81 – 126]          | [69 – 98]         |
| PA    | [25,569 – 27,175]       | [12,144 – 12,573]   | [5,873 – 6,151]         | [1,215 – 1,413]     | [0 – 81]          |
| RI    | [2,134 – 3,260]         | [465 – 569]         | [615 – 740]             | [113 – 174]         | [0 – 48]          |
| SC    | [8,223 – 9,374]         | [11,263 – 11,613]   | [1,835 – 1,943]         | [69 – 92]           | [32 – 48]         |
| SD    | [2,403 – 3,233]         | [56 – 75]           | [166 – 194]             | [80 – 101]          | [1,150 – 1,259]   |
| TN    | [17,079 – 19,214]       | [9,377 – 9,691]     | [2,869 – 3,029]         | [157 – 226]         | [43 – 82]         |
| TX    | [38,200 – 42,254]       | [22,343 – 22,944]   | [125,304 – 126,456]     | [2,512 – 2,816]     | [350 – 547]       |
| UT    | [3,459 – 4,465]         | [36 – 55]           | [1,708 – 1,835]         | [105 – 145]         | [347 – 411]       |
| VA    | [7,303 – 8,791]         | [7,364 – 7,683]     | [4,482 – 4,710]         | [584 – 721]         | [12 – 77]         |
| WA    | [4,856 – 6,385]         | [472 – 569]         | [3,732 – 3,929]         | [733 – 857]         | [620 – 716]       |
| WV    | [2,257 – 3,078]         | [88 – 131]          | [0 – 10]                | [20 – 30]           | [10 – 20]         |
| WI    | [10,177 – 11,933]       | [2,016 – 2,162]     | [2,890 – 3,055]         | [593 – 667]         | [355 – 421]       |

**Table S1:** Conservative 95% interval estimates of total COVID-19-attributable YPLL before age 75 for NH Whites, NH Blacks, Hispanics, NH Asians, and NH AIAN's in the U.S. and in each examined state with respect to cumulative COVID-19 deaths according to data from the National Center for Health Statistics as of 30 December 2020.
