# Supplementary material for: Racial and Ethnic Disparities in Years of Potential Life Lost Attributable to COVID-19 in the United States: An Analysis of 45 States and the District of Columbia
Source: MDPI journal article supplement (doi:10.3390/ijerph18062921), 2021-03-12
Supplement: s1 [file s1]

| State | NH White            | NH Black          | Hispanic          | NH Asian          | NH AIAN         |
|-------|---------------------|-------------------|-------------------|-------------------|-----------------|
| US    | [177,636 – 179,096] | [51,054 – 52,514] | [56,097 – 57,557] | [10,725 – 12,185] | [3,318 – 4,778] |
| AL    | [3,427 – 3,470]     | [1,654 – 1,689]   | [103 – 152]       | [6 – 55]          | [4 – 53]        |
| AZ    | [3,283 – 3,410]     | [209 – 344]       | [2,270 – 2,389]   | [105 – 240]       | [884 – 1,019]   |
| AR    | [2,440 – 2,456]     | [441 – 449]       | [129 – 145]       | [5 – 45]          | [4 – 36]        |
| CA    | [6,865 – 6,909]     | [1,471 – 1,531]   | [10,418 – 10,478] | [2,519 – 2,579]   | [81 – 149]      |
| CO    | [2,472 – 2,532]     | [191 – 243]       | [989 – 1,041]     | [132 – 192]       | [29 – 105]      |
| CT    | [3,738 – 3,797]     | [731 – 790]       | [483 – 542]       | [62 – 121]        | [2 – 61]        |
| DE    | [499 – 523]         | [167 – 191]       | [17 – 41]         | [3 – 27]          | [3 – 27]        |
| DC    | [105 – 121]         | [610 – 626]       | [123 – 147]       | [6 – 34]          | [1 – 9]         |
| FL    | [10,182 – 10,207]   | [3,641 – 3,658]   | [5,188 – 5,213]   | [265 – 298]       | [7 – 54]        |
| GA    | [4,561 – 4,586]     | [3,239 – 3,264]   | [541 – 574]       | [128 – 168]       | [3 – 36]        |
| ID    | [1,012 – 1,045]     | [3 – 36]          | [129 – 154]       | [5 – 41]          | [5 – 41]        |
| IL    | [8,327 – 8,426]     | [2,585 – 2,668]   | [2,415 – 2,506]   | [510 – 609]       | [4 – 103]       |
| IN    | [6,154 – 6,187]     | [850 – 875]       | [289 – 306]       | [54 – 87]         | [3 – 36]        |
| IA    | [3,588 – 3,604]     | [101 – 125]       | [117 – 133]       | [46 – 70]         | [6 – 54]        |
| KS    | [2,062 – 2,123]     | [163 – 232]       | [228 – 289]       | [17 – 89]         | [17 – 89]       |
| KY    | [2,635 – 2,660]     | [317 – 342]       | [69 – 94]         | [6 – 39]          | [2 – 27]        |
| LA    | [3,179 – 3,223]     | [2,612 – 2,670]   | [159 – 217]       | [23 – 81]         | [5 – 63]        |
| MD    | [2,688 – 2,726]     | [2,162 – 2,200]   | [579 – 617]       | [205 – 243]       | [4 – 42]        |
| MA    | [7,421 – 7,533]     | [757 – 869]       | [660 – 772]       | [285 – 397]       | [4 – 123]       |
| MI    | [6,725 – 6,842]     | [2,808 – 2,933]   | [323 – 448]       | [82 – 223]        | [32 – 173]      |
| MN    | [4,113 – 4,156]     | [255 – 298]       | [142 – 192]       | [173 – 216]       | [45 – 95]       |
| MS    | [2,281 – 2,307]     | [1,817 – 1,851]   | [22 – 63]         | [16 – 57]         | [86 – 127]      |
| MO    | [5,142 – 5,184]     | [794 – 828]       | [137 – 163]       | [55 – 97]         | [5 – 63]        |
| MT    | [716 – 732]         | [4 – 25]          | [15 – 36]         | [4 – 25]          | [185 – 201]     |
| NE    | [1,533 – 1,575]     | [66 – 110]        | [147 – 191]       | [5 – 49]          | [5 – 49]        |
| NV    | [1,173 – 1,197]     | [272 – 288]       | [725 – 733]       | [290 – 298]       | [16 – 64]       |
| NH    | [598 – 628]         | [5 – 35]          | [4 – 34]          | [4 – 34]          | [0 – 9]         |
| NJ    | [9,060 – 9,077]     | [2,843 – 2,860]   | [3,456 – 3,481]   | [985 – 1,016]     | [6 – 37]        |
| NM    | [513 – 544]         | [6 – 37]          | [642 – 659]       | [4 – 35]          | [640 – 657]     |
| NY    | [15,459 – 16,449]   | [8,147 – 9,113]   | [8,581 – 9,531]   | [2,631 – 3,597]   | [20 – 1,010]    |
| NC    | [1,964 – 1,999]     | [1,045 – 1,072]   | [289 – 328]       | [45 – 84]         | [26 – 65]       |
| ND    | [981 – 1,029]       | [3 – 51]          | [7 – 55]          | [3 – 51]          | [70 – 118]      |
| OH    | [7,526 – 7,543]     | [1,242 – 1,275]   | [144 – 169]       | [86 – 119]        | [4 – 38]        |
| OK    | [2,035 – 2,067]     | [162 – 178]       | [162 – 186]       | [24 – 56]         | [287 – 295]     |
| OR    | [841 – 867]         | [7 – 52]          | [158 – 184]       | [43 – 77]         | [6 – 51]        |
| PA    | [11,049 – 11,102]   | [2,127 – 2,180]   | [658 – 711]       | [288 – 341]       | [3 – 56]        |
| RI    | [1,172 – 1,197]     | [81 – 114]        | [115 – 152]       | [7 – 44]          | [2 – 27]        |
| SC    | [2,749 – 2,774]     | [1,675 – 1,700]   | [117 – 142]       | [15 – 64]         | [4 – 45]        |
| SD    | [1,140 – 1,156]     | [4 – 36]          | [8 – 42]          | [6 – 40]          | [142 – 166]     |
| TN    | [4,505 – 4,539]     | [1,138 – 1,164]   | [200 – 234]       | [28 – 62]         | [3 – 37]        |
| TX    | [9,682 – 9,760]     | [2,699 – 2,777]   | [13,441 – 13,519] | [486 – 557]       | [41 – 119]      |
| UT    | [901 – 917]         | [5 – 45]          | [205 – 229]       | [27 – 59]         | [36 – 76]       |
| VA    | [3,001 – 3,040]     | [1,236 – 1,275]   | [410 – 449]       | [182 – 221]       | [4 – 43]        |
| WA    | [2,120 – 2,165]     | [89 – 134]        | [404 – 447]       | [203 – 248]       | [74 – 117]      |
| WV    | [738 – 755]         | [18 – 35]         | [2 – 19]          | [2 – 19]          | [2 – 19]        |
| WI    | [4,297 – 4,321]     | [342 – 374]       | [290 – 306]       | [76 – 92]         | [57 – 89]       |

**Table S2:** Intervals denoting the entire plausible range of total COVID-19 deaths for NH Whites, NH Blacks, Hispanics, NH Asians, and NH AIAN's in the U.S. and in each examined state with respect to cumulative COVID-19 deaths according to data from the National Center for Health Statistics as of 30 December 2020.
