# Supplementary material for: Racial and Ethnic Disparities in Years of Potential Life Lost Attributable to COVID-19 in the United States: An Analysis of 45 States and the District of Columbia
Source: MDPI journal article supplement (doi:10.3390/ijerph18062921), 2021-03-12
Supplement: s1 [file s1]

| State | NH Black       |                | Hispanic       |                | NH Asian       |                | NH AIAN         |                |
|-------|----------------|----------------|----------------|----------------|----------------|----------------|-----------------|----------------|
|       | YPLL           | Mortality      | YPLL           | Mortality      | YPLL           | Mortality      | YPLL            | Mortality      |
| US    | [2.84 – 2.97]  | [1.91 – 1.99]  | [2.90 – 3.02]  | [1.95 – 2.03]  | [0.99 – 1.17]  | [0.83 – 0.95]  | [3.79 – 5.06]   | [1.82 – 2.70]  |
| AL    | [2.79 – 3.32]  | [1.74 – 1.81]  | [2.63 – 4.59]  | [1.22 – 1.95]  | [0.20 – 2.95]  | [0.12 – 1.57]  | [0.24 – 4.53]   | [0.13 – 2.19]  |
| AZ    | [1.86 – 5.50]  | [1.74 – 2.87]  | [4.41 – 6.22]  | [3.43 – 3.79]  | [0.73 – 4.28]  | [0.95 – 2.10]  | [14.79 – 23.70] | [7.42 – 8.97]  |
| AR    | [2.01 – 2.64]  | [1.42 – 1.47]  | [2.81 – 4.20]  | [1.78 – 1.92]  | [0.21 – 2.86]  | [0.17 – 1.62]  | [0.13 – 2.42]   | [0.19 – 1.90]  |
| CA    | [3.31 – 3.89]  | [2.18 – 2.29]  | [6.16 – 6.45]  | [3.64 – 3.69]  | [1.25 – 1.50]  | [1.20 – 1.25]  | [1.32 – 5.63]   | [1.28 – 2.36]  |
| CO    | [2.82 – 6.50]  | [2.04 – 2.62]  | [4.24 – 6.41]  | [2.76 – 2.97]  | [1.71 – 6.55]  | [1.60 – 2.27]  | [4.09 – 22.40]  | [1.26 – 5.82]  |
| CT    | [3.55 – 6.37]  | [2.47 – 2.73]  | [2.79 – 4.48]  | [1.66 – 1.90]  | [0.71 – 3.04]  | [0.58 – 1.12]  | [0.01 – 23.20]  | [0.21 – 7.44]  |
| DE    | [0.92 – 4.39]  | [1.55 – 1.89]  | [0.50 – 6.21]  | [0.63 – 2.10]  | [0.06 – 2.01]  | [0.17 – 1.76]  | [0.35 – 13.67]  | [0.79 – 10.53] |
| DC    | [3.91 – 10.69] | [3.14 – 3.65]  | [8.36 – 24.29] | [4.41 – 5.97]  | [0.67 – 16.30] | [0.49 – 4.64]  | [1.22 – 56.22]  | [0.65 – 10.26] |
| FL    | [3.91 – 4.30]  | [2.80 – 2.83]  | [2.53 – 2.82]  | [2.21 – 2.24]  | [0.90 – 1.75]  | [0.92 – 1.02]  | [0.92 – 10.31]  | [0.21 – 1.78]  |
| GA    | [2.66 – 3.02]  | [1.92 – 1.96]  | [3.32 – 4.05]  | [1.82 – 1.94]  | [0.58 – 1.71]  | [0.64 – 0.81]  | [0.34 – 4.65]   | [0.16 – 2.20]  |
| ID    | [0.87 – 21.78] | [0.87 – 12.62] | [2.96 – 6.96]  | [2.46 – 2.90]  | [0.65 – 12.42] | [0.29 – 3.16]  | [0.69 – 14.50]  | [0.40 – 3.88]  |
| IL    | [4.13 – 5.16]  | [2.00 – 2.10]  | [5.60 – 6.84]  | [2.65 – 2.79]  | [1.20 – 2.44]  | [1.07 – 1.26]  | [0.49 – 20.37]  | [0.18 – 5.28]  |
| IN    | [2.71 – 3.67]  | [1.89 – 1.95]  | [2.81 – 3.80]  | [1.51 – 1.58]  | [0.48 – 2.04]  | [0.81 – 1.06]  | [0.29 – 11.12]  | [0.16 – 2.02]  |
| IA    | [2.61 – 5.15]  | [1.99 – 2.20]  | [3.19 – 4.73]  | [1.67 – 1.82]  | [0.66 – 3.38]  | [1.44 – 1.83]  | [2.02 – 25.09]  | [0.72 – 8.00]  |
| KS    | [2.12 – 7.58]  | [1.82 – 2.52]  | [3.10 – 6.58]  | [2.26 – 2.80]  | [0.27 – 7.74]  | [0.42 – 2.17]  | [2.00 – 31.90]  | [1.04 – 6.87]  |
| KY    | [2.08 – 3.36]  | [1.86 – 2.02]  | [3.65 – 5.80]  | [1.31 – 2.07]  | [0.37 – 4.71]  | [0.20 – 1.79]  | [0.02 – 4.14]   | [0.26 – 4.07]  |
| LA    | [3.67 – 4.38]  | [2.20 – 2.28]  | [1.86 – 3.96]  | [1.10 – 1.47]  | [0.52 – 2.24]  | [0.35 – 1.33]  | [0.43 – 7.60]   | [0.16 – 2.35]  |
| MD    | [3.19 – 4.34]  | [2.15 – 2.24]  | [7.20 – 9.95]  | [2.85 – 3.21]  | [0.77 – 2.27]  | [0.90 – 1.09]  | [0.47 – 13.77]  | [0.31 – 4.03]  |
| MA    | [3.03 – 4.79]  | [1.87 – 2.17]  | [2.67 – 3.98]  | [1.59 – 1.88]  | [0.83 – 2.11]  | [0.86 – 1.17]  | [0.46 – 30.33]  | [0.23 – 7.93]  |
| MI    | [5.77 – 6.67]  | [3.27 – 3.48]  | [3.09 – 4.69]  | [1.87 – 2.69]  | [0.34 – 2.33]  | [0.55 – 1.43]  | [0.71 – 8.14]   | [0.76 – 4.44]  |
| MN    | [4.43 – 6.67]  | [2.40 – 2.87]  | [4.58 – 8.64]  | [2.01 – 2.72]  | [3.82 – 6.05]  | [1.75 – 2.19]  | [3.29 – 13.73]  | [1.48 – 3.67]  |
| MS    | [2.71 – 3.27]  | [1.92 – 1.98]  | [1.09 – 3.78]  | [0.37 – 1.42]  | [0.57 – 4.39]  | [0.56 – 2.32]  | [17.97 – 34.13] | [5.89 – 9.46]  |
| MO    | [2.30 – 3.07]  | [1.67 – 1.76]  | [2.82 – 3.97]  | [1.25 – 1.56]  | [0.41 – 2.31]  | [0.83 – 1.31]  | [0.32 – 5.05]   | [0.18 – 2.46]  |
| MT    | [3.26 – 53.89] | [1.12 – 26.66] | [1.55 – 12.14] | [1.16 – 3.52]  | [0.91 – 17.22] | [0.73 – 6.41]  | [11.14 – 22.46] | [6.69 – 7.46]  |
| NE    | [1.52 – 7.38]  | [1.51 – 2.35]  | [3.33 – 7.45]  | [2.40 – 3.02]  | [0.29 – 6.31]  | [0.19 – 2.71]  | [0.99 – 20.04]  | [0.59 – 7.63]  |
| NV    | [2.49 – 4.47]  | [2.05 – 2.21]  | [3.42 – 5.15]  | [2.80 – 2.93]  | [1.25 – 2.25]  | [1.62 – 1.73]  | [1.47 – 15.77]  | [0.89 – 3.94]  |
| NH    | [1.11 – 54.19] | [1.04 – 11.01] | [0.28 – 21.60] | [0.42 – 4.50]  | [0.53 – 25.86] | [0.37 – 4.15]  | [0.00 – 57.70]  | [0.00 – 4.95]  |
| NJ    | [3.70 – 3.99]  | [2.20 – 2.23]  | [4.44 – 4.76]  | [2.36 – 2.39]  | [1.30 – 1.78]  | [1.13 – 1.17]  | [1.00 – 10.92]  | [0.25 – 1.81]  |
| NM    | [0.48 – 12.28] | [0.35 – 3.06]  | [1.43 – 3.91]  | [1.79 – 2.04]  | [0.12 – 4.29]  | [0.28 – 3.24]  | [11.83 – 31.63] | [9.84 – 11.31] |
| NY    | [3.84 – 5.76]  | [2.77 – 3.32]  | [4.57 – 6.49]  | [2.94 – 3.52]  | [1.91 – 3.80]  | [1.55 – 2.28]  | [0.24 – 29.90]  | [0.29 – 15.33] |
| NC    | [3.16 – 4.05]  | [2.31 – 2.42]  | [6.57 – 9.71]  | [3.07 – 3.53]  | [0.69 – 5.41]  | [1.09 – 1.82]  | [0.71 – 8.36]   | [0.99 – 2.61]  |
| ND    | [0.31 – 15.37] | [0.45 – 13.61] | [0.95 – 21.94] | [0.48 – 10.16] | [0.01 – 14.99] | [0.51 – 13.59] | [4.14 – 14.58]  | [2.51 – 4.91]  |
| OH    | [2.43 – 2.95]  | [1.55 – 1.59]  | [1.95 – 2.77]  | [1.05 – 1.20]  | [0.66 – 1.91]  | [0.79 – 0.99]  | [0.47 – 6.19]   | [0.17 – 2.06]  |
| OK    | [1.12 – 2.53]  | [1.25 – 1.37]  | [2.12 – 4.06]  | [1.78 – 1.94]  | [0.41 – 3.34]  | [0.66 – 1.43]  | [2.25 – 3.69]   | [1.83 – 1.91]  |
| OR    | [1.55 – 19.85] | [0.47 – 5.04]  | [6.57 – 9.66]  | [3.56 – 4.39]  | [0.57 – 4.25]  | [1.34 – 2.33]  | [1.74 – 23.82]  | [0.58 – 6.03]  |
| PA    | [3.89 – 4.61]  | [2.34 – 2.42]  | [3.50 – 4.29]  | [1.97 – 2.14]  | [1.30 – 2.45]  | [1.24 – 1.45]  | [0.01 – 11.72]  | [0.16 – 3.31]  |
| RI    | [2.08 – 10.31] | [1.63 – 2.17]  | [1.55 – 6.27]  | [1.52 – 1.81]  | [0.67 – 13.03] | [0.22 – 1.84]  | [0.01 – 34.71]  | [0.39 – 7.28]  |
| SC    | [3.35 – 4.25]  | [2.13 – 2.19]  | [3.10 – 4.25]  | [1.16 – 1.62]  | [0.26 – 3.22]  | [0.32 – 1.49]  | [0.62 – 8.89]   | [0.32 – 4.16]  |
| SD    | [0.73 – 12.36] | [0.43 – 6.14]  | [1.22 – 14.13] | [0.40 – 3.90]  | [1.36 – 19.89] | [0.73 – 7.58]  | [5.61 – 12.40]  | [3.08 – 3.48]  |
| TN    | [2.44 – 3.02]  | [1.75 – 1.81]  | [3.25 – 4.96]  | [1.77 – 2.07]  | [0.31 – 2.54]  | [0.42 – 1.00]  | [0.52 – 9.63]   | [0.16 – 2.17]  |
| TX    | [2.10 – 2.57]  | [1.70 – 1.76]  | [4.38 – 4.99]  | [3.19 – 3.24]  | [0.58 – 1.01]  | [0.78 – 0.89]  | [0.93 – 7.66]   | [0.55 – 1.72]  |
| UT    | [0.72 – 10.38] | [0.75 – 7.76]  | [3.42 – 5.58]  | [2.80 – 2.99]  | [0.60 – 4.23]  | [1.03 – 1.96]  | [7.31 – 24.85]  | [3.81 – 8.58]  |
| VA    | [2.94 – 4.08]  | [1.88 – 1.98]  | [4.84 – 7.34]  | [2.49 – 2.87]  | [0.75 – 2.03]  | [0.94 – 1.16]  | [0.27 – 16.92]  | [0.30 – 3.81]  |
| WA    | [1.62 – 6.11]  | [1.45 – 2.13]  | [5.77 – 9.34]  | [3.56 – 4.00]  | [1.03 – 3.21]  | [1.03 – 1.27]  | [5.24 – 16.17]  | [2.52 – 4.12]  |
| WV    | [0.86 – 6.05]  | [0.81 – 1.95]  | [0.01 – 3.36]  | [0.29 – 3.93]  | [0.84 – 12.14] | [0.31 – 4.28]  | [1.04 – 24.02]  | [0.83 – 15.22] |
| WI    | [3.06 – 5.71]  | [2.32 – 2.46]  | [5.19 – 7.38]  | [2.71 – 2.84]  | [2.27 – 4.39]  | [1.31 – 1.46]  | [3.15 – 11.94]  | [1.96 – 3.16]  |

**Table S5:** Conservative 95% interval estimates of the age-adjusted YPLL and mortality rate ratios for NH Blacks, Hispanics, NH Asians, and NH AIAN's relative to NH Whites in the U.S. and in each examined state with respect to cumulative COVID-19 deaths according to data from the National Center for Health Statistics as of 30 December 2020. The upper reference age used to define YPLL is 75 years.
