# Supplementary material for: Racial and Ethnic Disparities in Years of Potential Life Lost Attributable to COVID-19 in the United States: An Analysis of 45 States and the District of Columbia
Source: MDPI journal article supplement (doi:10.3390/ijerph18062921), 2021-03-12
Supplement: s1 [file s1]

| State | NH White      |               | NH Black        |               | Hispanic        |               | NH Asian       |               | NH AIAN           |                |
|-------|---------------|---------------|-----------------|---------------|-----------------|---------------|----------------|---------------|-------------------|----------------|
|       | YPLL          | Mortality     | YPLL            | Mortality     | YPLL            | Mortality     | YPLL           | Mortality     | YPLL              | Mortality      |
| US    | [63.3 – 64.5] | [7.4 – 7.4]   | [182.7 – 188.0] | [14.2 – 14.7] | [186.7 – 191.2] | [14.5 – 15.0] | [63.8 – 74.2]  | [6.2 – 7.0]   | [244.0 – 321.0]   | [13.5 – 19.9]  |
| AL    | [36.6 – 41.8] | [8.9 – 9.0]   | [115.8 – 122.7] | [15.7 – 16.1] | [108.7 – 169.3] | [11.0 – 17.4] | [8.3 – 109.4]  | [1.1 – 13.9]  | [10.2 – 169.2]    | [1.2 – 19.4]   |
| AZ    | [22.0 – 28.9] | [5.4 – 5.7]   | [52.8 – 122.0]  | [10.0 – 15.6] | [126.5 – 137.6] | [19.6 – 20.6] | [21.0 – 95.4]  | [5.5 – 11.4]  | [423.3 – 524.4]   | [42.4 – 48.8]  |
| AR    | [31.8 – 37.1] | [9.1 – 9.2]   | [73.7 – 84.8]   | [13.1 – 13.4] | [103.0 – 135.2] | [16.4 – 17.5] | [7.7 – 92.1]   | [1.5 – 14.8]  | [4.7 – 78.8]      | [1.7 – 17.3]   |
| CA    | [12.6 – 13.0] | [3.4 – 3.4]   | [42.7 – 49.1]   | [7.4 – 7.7]   | [79.9 – 81.4]   | [12.3 – 12.4] | [16.1 – 19.0]  | [4.1 – 4.2]   | [17.2 – 71.9]     | [4.3 – 8.0]    |
| CO    | [13.4 – 18.2] | [6.2 – 6.4]   | [50.5 – 88.3]   | [13.0 – 16.3] | [76.3 – 86.8]   | [17.6 – 18.5] | [30.5 – 89.2]  | [10.2 – 14.1] | [73.3 – 304.2]    | [8.0 – 36.2]   |
| CT    | [23.2 – 29.3] | [10.5 – 10.8] | [102.5 – 149.0] | [26.6 – 28.8] | [80.7 – 105.5]  | [17.9 – 20.1] | [20.3 – 72.0]  | [6.3 – 11.8]  | [0.47 – 555.6]    | [2.3 – 78.5]   |
| DE    | [22.4 – 53.4] | [5.9 – 6.4]   | [49.1 – 100.2]  | [10.0 – 11.1] | [27.8 – 140.2]  | [4.1 – 12.3]  | [3.0 – 45.9]   | [1.1 – 10.4]  | [18.8 – 320.9]    | [5.1 – 61.7]   |
| DC    | [15.8 – 36.6] | [5.5 – 6.3]   | [140.6 – 171.5] | [19.7 – 20.3] | [298.7 – 394.1] | [27.5 – 33.5] | [22.6 – 262.2] | [3.0 – 26.0]  | [42.6 – 963.9]    | [4.1 – 58.4]   |
| FL    | [21.9 – 23.6] | [5.1 – 5.2]   | [91.6 – 94.7]   | [14.4 – 14.5] | [59.2 – 62.0]   | [11.4 – 11.5] | [20.9 – 38.5]  | [4.7 – 5.3]   | [21.5 – 227.6]    | [1.1 – 9.1]    |
| GA    | [28.1 – 30.8] | [7.4 – 7.5]   | [81.4 – 85.7]   | [14.4 – 14.6] | [101.5 – 114.8] | [13.6 – 14.4] | [17.8 – 48.8]  | [4.8 – 6.0]   | [10.4 – 132.4]    | [1.2 – 16.3]   |
| ID    | [15.4 – 24.7] | [6.6 – 6.9]   | [21.3 – 347.9]  | [5.9 – 83.1]  | [71.2 – 110.1]  | [16.8 – 19.2] | [15.7 – 197.2] | [2.0 – 20.9]  | [16.9 – 231.8]    | [2.7 – 25.7]   |
| IL    | [23.0 – 26.6] | [8.4 – 8.6]   | [109.1 – 119.0] | [17.2 – 17.7] | [148.0 – 158.3] | [22.7 – 23.6] | [31.5 – 56.5]  | [9.1 – 10.7]  | [13.0 – 472.3]    | [1.5 – 44.6]   |
| IN    | [30.0 – 34.6] | [10.4 – 10.5] | [92.7 – 111.3]  | [19.8 – 20.3] | [96.7 – 115.2]  | [15.8 – 16.5] | [16.5 – 61.8]  | [8.5 – 11.0]  | [10.4 – 338.0]    | [1.6 – 21.0]   |
| IA    | [32.0 – 36.5] | [10.5 – 10.6] | [94.4 – 167.3]  | [21.0 – 23.2] | [115.0 – 153.4] | [17.7 – 19.2] | [24.2 – 109.6] | [15.3 – 19.4] | [71.9 – 817.1]    | [7.7 – 84.2]   |
| KS    | [21.1 – 29.4] | [7.6 – 7.9]   | [61.5 – 162.8]  | [14.3 – 19.1] | [89.3 – 141.5]  | [17.8 – 21.3] | [7.8 – 165.9]  | [3.3 – 16.5]  | [56.9 – 687.9]    | [8.1 – 52.2]   |
| KY    | [21.6 – 25.2] | [6.5 – 6.6]   | [51.7 – 73.6]   | [12.2 – 13.2] | [90.7 – 126.8]  | [8.6 – 13.5]  | [9.0 – 103.1]  | [1.3 – 11.7]  | [0.21 – 91.1]     | [1.7 – 26.7]   |
| LA    | [37.3 – 41.3] | [10.3 – 10.4] | [150.5 – 164.3] | [22.9 – 23.4] | [76.1 – 149.5]  | [11.4 – 15.1] | [20.9 – 84.7]  | [3.7 – 13.6]  | [17.7 – 287.4]    | [1.7 – 24.1]   |
| MD    | [17.9 – 22.2] | [6.8 – 6.9]   | [70.0 – 78.3]   | [14.9 – 15.2] | [157.6 – 179.2] | [19.8 – 21.9] | [16.7 – 41.2]  | [6.2 – 7.4]   | [10.3 – 251.6]    | [2.2 – 27.4]   |
| MA    | [23.9 – 28.0] | [11.4 – 11.6] | [83.7 – 115.9]  | [21.7 – 24.8] | [73.8 – 96.4]   | [18.5 – 21.4] | [22.9 – 51.2]  | [10.0 – 13.4] | [12.9 – 731.3]    | [2.7 – 90.7]   |
| MI    | [25.1 – 27.1] | [7.4 – 7.6]   | [154.9 – 168.6] | [24.7 – 25.8] | [82.7 – 119.0]  | [14.1 – 19.9] | [9.2 – 59.2]   | [4.2 – 10.6]  | [19.2 – 206.7]    | [5.7 – 33.0]   |
| MN    | [14.8 – 17.5] | [7.5 – 7.6]   | [76.6 – 100.2]  | [18.3 – 21.6] | [79.1 – 129.5]  | [15.3 – 20.5] | [66.2 – 91.2]  | [13.3 – 16.4] | [56.8 – 206.5]    | [11.3 – 27.6]  |
| MS    | [47.3 – 53.2] | [11.3 – 11.5] | [142.8 – 155.8] | [22.0 – 22.4] | [57.1 – 180.6]  | [4.3 – 16.1]  | [30.2 – 210.1] | [6.4 – 26.2]  | [942.4 – 1,636.5] | [67.8 – 106.9] |
| MO    | [27.5 – 31.4] | [8.9 – 9.0]   | [71.6 – 85.2]   | [15.0 – 15.6] | [87.6 – 110.9]  | [11.2 – 13.9] | [12.7 – 64.3]  | [7.4 – 11.7]  | [9.8 – 140.1]     | [1.6 – 21.9]   |
| MT    | [17.9 – 27.0] | [6.4 – 6.6]   | [85.8 – 998.4]  | [7.5 – 171.0] | [40.0 – 222.0]  | [7.6 – 22.6]  | [24.0 – 320.6] | [4.8 – 41.0]  | [294.7 – 411.5]   | [44.1 – 47.7]  |
| NE    | [25.6 – 35.3] | [8.4 – 8.7]   | [52.9 – 190.8]  | [13.1 – 19.7] | [116.1 – 193.8] | [20.7 – 25.3] | [10.1 – 164.6] | [1.7 – 22.8]  | [34.4 – 520.3]    | [5.1 – 64.0]   |
| NV    | [22.8 – 33.0] | [6.0 – 6.3]   | [80.9 – 103.9]  | [12.8 – 13.4] | [111.3 – 118.8] | [17.5 – 17.7] | [40.6 – 52.5]  | [10.1 – 10.5] | [47.5 – 367.2]    | [5.5 – 23.9]   |
| NH    | [5.5 – 17.3]  | [4.1 – 4.4]   | [19.4 – 307.5]  | [4.7 – 45.4]  | [5.1 – 124.8]   | [1.9 – 18.6]  | [9.1 – 146.9]  | [1.7 – 17.1]  | [0.00 – 335.6]    | [0.00 – 20.4]  |
| NJ    | [45.1 – 47.3] | [13.2 – 13.2] | [173.8 – 181.1] | [29.2 – 29.4] | [208.6 – 216.2] | [31.2 – 31.5] | [61.0 – 81.1]  | [15.0 – 15.5] | [46.1 – 497.9]    | [3.4 – 23.9]   |
| NM    | [13.7 – 34.9] | [4.1 – 4.6]   | [16.1 – 171.3]  | [1.6 – 12.7]  | [49.0 – 54.7]   | [8.3 – 8.5]   | [3.9 – 61.4]   | [1.3 – 13.4]  | [406.8 – 439.5]   | [45.4 – 46.9]  |
| NY    | [39.9 – 51.1] | [10.6 – 11.4] | [195.4 – 230.6] | [31.5 – 35.3] | [232.2 – 259.7] | [33.5 – 37.4] | [96.9 – 152.2] | [17.7 – 24.2] | [12.1 – 1,198.2]  | [3.3 – 163.0]  |
| NC    | [8.0 – 9.5]   | [2.5 – 2.5]   | [29.7 – 32.6]   | [5.8 – 6.0]   | [61.4 – 77.9]   | [7.7 – 8.7]   | [6.5 – 43.6]   | [2.8 – 4.5]   | [6.5 – 67.9]      | [2.5 – 6.4]    |
| ND    | [31.5 – 54.4] | [12.5 – 13.4] | [15.9 – 501.0]  | [6.2 – 170.8] | [49.8 – 702.8]  | [7.0 – 127.4] | [0.38 – 486.8] | [7.0 – 171.0] | [219.6 – 471.7]   | [34.0 – 61.8]  |
| OH    | [20.4 – 21.4] | [6.8 – 6.9]   | [51.7 – 60.7]   | [10.6 – 10.9] | [41.3 – 57.1]   | [7.2 – 8.2]   | [14.1 – 39.4]  | [5.4 – 6.8]   | [9.9 – 127.3]     | [1.2 – 14.1]   |
| OK    | [21.8 – 30.6] | [6.3 – 6.4]   | [34.0 – 56.0]   | [8.0 – 8.6]   | [64.1 – 89.7]   | [11.4 – 12.2] | [12.1 – 74.3]  | [4.2 – 9.0]   | [68.0 – 81.9]     | [11.8 – 12.1]  |
| OR    | [5.8 – 7.2]   | [2.1 – 2.2]   | [10.9 – 116.0]  | [1.0 – 10.7]  | [45.9 – 57.0]   | [7.8 – 9.3]   | [3.9 – 24.9]   | [2.9 – 5.0]   | [11.9 – 140.5]    | [1.3 – 12.8]   |
| PA    | [22.8 – 24.5] | [8.2 – 8.2]   | [94.8 – 106.1]  | [19.3 – 19.8] | [84.7 – 98.9]   | [16.2 – 17.5] | [31.5 – 56.4]  | [10.2 – 11.9] | [0.10 – 268.5]    | [1.3 – 27.1]   |
| RI    | [23.1 – 39.3] | [10.7 – 11.1] | [79.9 – 241.7]  | [18.0 – 23.2] | [59.7 – 146.5]  | [16.8 – 19.3] | [25.2 – 302.6] | [2.4 – 19.7]  | [0.83 – 828.5]    | [4.3 – 78.2]   |
| SC    | [21.6 – 25.3] | [6.9 – 7.0]   | [83.9 – 93.1]   | [14.8 – 15.1] | [77.2 – 93.4]   | [8.1 – 11.2]  | [6.4 – 71.1]   | [2.3 – 10.3]  | [15.3 – 197.6]    | [2.2 – 28.7]   |
| SD    | [29.7 – 42.2] | [12.5 – 12.8] | [30.3 – 380.2]  | [5.6 – 77.0]  | [50.1 – 421.0]  | [5.2 – 49.0]  | [54.1 – 607.6] | [9.4 – 95.7]  | [228.9 – 377.9]   | [39.4 – 43.6]  |
| TN    | [30.9 – 35.5] | [7.9 – 7.9]   | [86.5 – 94.1]   | [13.9 – 14.3] | [115.0 – 154.4] | [14.0 – 16.3] | [11.8 – 79.0]  | [3.3 – 7.8]   | [18.7 – 302.4]    | [1.3 – 17.0]   |
| TX    | [29.1 – 32.7] | [7.0 – 7.0]   | [68.3 – 75.3]   | [12.0 – 12.3] | [142.7 – 145.9] | [22.5 – 22.6] | [18.8 – 29.7]  | [5.5 – 6.2]   | [30.2 – 224.5]    | [3.9 – 12.0]   |
| UT    | [15.9 – 19.7] | [4.7 – 4.7]   | [13.9 – 169.1]  | [3.5 – 36.0]  | [66.1 – 90.5]   | [13.2 – 13.9] | [11.5 – 68.9]  | [4.9 – 9.1]   | [141.0 – 403.8]   | [18.0 – 40.0]  |
| VA    | [12.5 – 15.4] | [4.9 – 5.0]   | [45.0 – 51.4]   | [9.3 – 9.7]   | [73.9 – 92.0]   | [12.4 – 14.1] | [11.6 – 25.7]  | [4.7 – 5.7]   | [4.5 – 215.4]     | [1.5 – 18.6]   |
| WA    | [8.1 – 11.1]  | [3.5 – 3.6]   | [17.7 – 50.9]   | [5.3 – 7.6]   | [63.0 – 77.1]   | [12.9 – 14.2] | [11.1 – 26.6]  | [3.8 – 4.5]   | [57.2 – 133.9]    | [9.1 – 14.6]   |
| WV    | [11.8 – 17.3] | [3.6 – 3.7]   | [13.9 – 73.6]   | [3.0 – 7.0]   | [0.23 – 40.9]   | [1.1 – 14.2]  | [14.2 – 146.7] | [1.1 – 15.5]  | [17.3 – 293.2]    | [3.1 – 54.5]   |
| WI    | [18.7 – 22.7] | [7.4 – 7.4]   | [68.8 – 108.0]  | [17.2 – 18.1] | [116.8 – 139.7] | [20.1 – 20.9] | [50.9 – 83.1]  | [9.7 – 10.7]  | [70.5 – 226.3]    | [14.6 – 23.3]  |

**Table S4:** Conservative 95% interval estimates of the age-adjusted YPLL and mortality rates for NH Whites, NH Blacks, Hispanics, NH Asians, and NH AIAN's in the U.S. and in each examined state with respect to cumulative COVID-19 deaths according to data from the National Center for Health Statistics as of 30 December 2020. The upper reference age used to define YPLL is 75 years.
