# Supplementary material for: Racial and Ethnic Disparities in Years of Potential Life Lost Attributable to COVID-19 in the United States: An Analysis of 45 States and the District of Columbia
Source: MDPI journal article supplement (doi:10.3390/ijerph18062921), 2021-03-12
Supplement: s1 [file s1]

| State | NH White       |                | NH Black       |                | Hispanic       |                | NH Asian       |                | NH AIAN        |                |
|-------|----------------|----------------|----------------|----------------|----------------|----------------|----------------|----------------|----------------|----------------|
|       | % YPLL         | % Deaths       |
| US    | [40.1 – 40.8%] | [58.9 – 59.4%] | [23.0 – 23.6%] | [16.9 – 17.4%] | [30.3 – 31.0%] | [18.6 – 19.1%] | [3.8 – 4.4%]   | [3.6 – 4.0%]   | [2.0 – 2.6%]   | [1.1 – 1.6%]   |
| AL    | [41.0 – 47.0%] | [65.3 – 66.1%] | [45.6 – 51.3%] | [31.5 – 32.2%] | [4.6 – 9.5%]   | [2.0 – 2.9%]   | [0.21 – 2.9%]  | [0.11 – 1.0%]  | [0.11 – 1.9%]  | [0.08 – 1.0%]  |
| AZ    | [19.9 – 25.9%] | [47.2 – 49.0%] | [3.0 – 8.4%]   | [3.0 – 4.9%]   | [43.2 – 49.9%] | [32.6 – 34.3%] | [0.97 – 5.7%]  | [1.5 – 3.4%]   | [22.2 – 29.2%] | [12.7 – 14.6%] |
| AR    | [48.2 – 61.6%] | [77.7 – 78.2%] | [19.7 – 27.3%] | [14.0 – 14.3%] | [8.3 – 15.0%]  | [4.1 – 4.6%]   | [0.22 – 3.2%]  | [0.16 – 1.4%]  | [0.08 – 1.5%]  | [0.13 – 1.1%]  |
| CA    | [14.4 – 15.1%] | [31.7 – 31.9%] | [6.9 – 8.1%]   | [6.8 – 7.1%]   | [67.5 – 69.5%] | [48.1 – 48.4%] | [7.1 – 8.2%]   | [11.6 – 11.9%] | [0.25 – 1.0%]  | [0.37 – 0.69%] |
| CO    | [31.6 – 45.6%] | [63.4 – 64.9%] | [5.8 – 13.2%]  | [4.9 – 6.2%]   | [36.3 – 49.8%] | [25.4 – 26.7%] | [2.8 – 11.1%]  | [3.4 – 4.9%]   | [1.6 – 8.8%]   | [0.74 – 2.7%]  |
| CT    | [41.4 – 52.3%] | [73.6 – 74.8%] | [22.0 – 33.3%] | [14.4 – 15.6%] | [20.9 – 30.7%] | [9.5 – 10.7%]  | [1.7 – 8.0%]   | [1.2 – 2.4%]   | [0.00 – 3.2%]  | [0.04 – 1.2%]  |
| DE    | [37.0 – 69.4%] | [69.8 – 73.1%] | [24.1 – 54.9%] | [23.4 – 26.7%] | [4.6 – 32.8%]  | [2.4 – 5.7%]   | [0.23 – 4.8%]  | [0.42 – 3.8%]  | [0.23 – 4.8%]  | [0.42 – 3.8%]  |
| DC    | [3.4 – 11.4%]  | [12.0 – 13.8%] | [52.3 – 68.9%] | [69.6 – 71.4%] | [23.9 – 38.7%] | [14.0 – 16.8%] | [0.94 – 10.9%] | [0.68 – 3.9%]  | [0.12 – 2.2%]  | [0.11 – 1.0%]  |
| FL    | [31.5 – 33.6%] | [52.5 – 52.6%] | [30.4 – 32.2%] | [18.8 – 18.9%] | [32.5 – 34.6%] | [26.8 – 26.9%] | [1.5 – 2.9%]   | [1.4 – 1.5%]   | [0.14 – 1.5%]  | [0.04 – 0.28%] |
| GA    | [31.4 – 35.0%] | [53.5 – 53.8%] | [47.8 – 52.0%] | [38.0 – 38.3%] | [13.5 – 17.1%] | [6.4 – 6.7%]   | [1.2 – 4.1%]   | [1.5 – 2.0%]   | [0.06 – 0.64%] | [0.04 – 0.42%] |
| ID    | [49.5 – 77.1%] | [84.8 – 87.5%] | [0.43 – 8.8%]  | [0.25 – 3.0%]  | [17.9 – 39.4%] | [10.8 – 12.9%] | [1.1 – 15.8%]  | [0.42 – 3.4%]  | [0.67 – 11.9%] | [0.42 – 3.4%]  |
| IL    | [28.6 – 32.8%] | [59.6 – 60.4%] | [26.8 – 30.1%] | [18.5 – 19.1%] | [35.5 – 39.5%] | [17.3 – 18.0%] | [3.0 – 6.1%]   | [3.7 – 4.4%]   | [0.05 – 1.8%]  | [0.03 – 0.74%] |
| IN    | [62.5 – 69.7%] | [83.2 – 83.7%] | [18.6 – 24.3%] | [11.5 – 11.8%] | [9.8 – 13.5%]  | [3.9 – 4.1%]   | [0.69 – 4.1%]  | [0.73 – 1.2%]  | [0.08 – 2.3%]  | [0.04 – 0.49%] |
| IA    | [62.7 – 80.1%] | [91.5 – 91.9%] | [5.3 – 15.0%]  | [2.6 – 3.2%]   | [7.9 – 15.2%]  | [3.0 – 3.4%]   | [0.84 – 6.2%]  | [1.2 – 1.8%]   | [0.53 – 6.6%]  | [0.15 – 1.4%]  |
| KS    | [43.1 – 66.9%] | [80.4 – 82.7%] | [8.1 – 27.7%]  | [6.4 – 9.0%]   | [17.1 – 36.4%] | [8.9 – 11.3%]  | [0.67 – 15.9%] | [0.66 – 3.5%]  | [1.4 – 19.5%]  | [0.66 – 3.5%]  |
| KY    | [67.0 – 77.4%] | [86.0 – 86.8%] | [12.6 – 20.1%] | [10.3 – 11.2%] | [7.9 – 12.7%]  | [2.3 – 3.1%]   | [0.50 – 6.0%]  | [0.20 – 1.3%]  | [0.00 – 0.95%] | [0.07 – 0.88%] |
| LA    | [29.7 – 34.7%] | [52.6 – 53.4%] | [57.4 – 64.6%] | [43.2 – 44.2%] | [3.6 – 9.4%]   | [2.6 – 3.6%]   | [0.43 – 2.1%]  | [0.38 – 1.3%]  | [0.15 – 2.6%]  | [0.08 – 1.0%]  |
| MD    | [20.5 – 25.5%] | [47.3 – 48.0%] | [43.2 – 49.3%] | [38.1 – 38.7%] | [26.0 – 31.5%] | [10.2 – 10.9%] | [2.1 – 5.9%]   | [3.6 – 4.3%]   | [0.07 – 1.7%]  | [0.07 – 0.74%] |
| MA    | [54.0 – 62.7%] | [80.1 – 81.3%] | [15.4 – 22.9%] | [8.2 – 9.4%]   | [16.5 – 24.0%] | [7.1 – 8.3%]   | [3.5 – 9.8%]   | [3.1 – 4.3%]   | [0.09 – 4.5%]  | [0.04 – 1.3%]  |
| MI    | [43.9 – 48.6%] | [66.4 – 67.6%] | [42.4 – 47.4%] | [27.7 – 29.0%] | [6.1 – 9.6%]   | [3.2 – 4.4%]   | [0.51 – 4.0%]  | [0.81 – 2.2%]  | [0.27 – 3.1%]  | [0.32 – 1.7%]  |
| MN    | [49.1 – 62.8%] | [86.0 – 86.9%] | [12.9 – 21.7%] | [5.3 – 6.2%]   | [9.1 – 22.2%]  | [3.0 – 4.0%]   | [8.0 – 15.1%]  | [3.6 – 4.5%]   | [2.0 – 9.3%]   | [0.94 – 2.0%]  |
| MS    | [30.7 – 35.9%] | [53.4 – 54.1%] | [54.4 – 61.2%] | [42.6 – 43.4%] | [1.2 – 5.6%]   | [0.52 – 1.5%]  | [0.32 – 2.9%]  | [0.37 – 1.3%]  | [4.8 – 9.3%]   | [2.0 – 3.0%]   |
| MO    | [61.7 – 71.0%] | [82.9 – 83.6%] | [19.1 – 25.3%] | [12.8 – 13.4%] | [6.6 – 9.7%]   | [2.2 – 2.6%]   | [0.57 – 3.8%]  | [0.89 – 1.6%]  | [0.14 – 2.2%]  | [0.08 – 1.0%]  |
| MT    | [40.3 – 58.6%] | [75.5 – 77.2%] | [1.2 – 13.8%]  | [0.42 – 2.6%]  | [2.2 – 16.2%]  | [1.6 – 3.8%]   | [0.68 – 9.2%]  | [0.42 – 2.6%]  | [34.1 – 52.3%] | [19.5 – 21.2%] |
| NE    | [48.3 – 72.5%] | [84.9 – 87.3%] | [4.8 – 24.6%]  | [3.7 – 6.1%]   | [17.6 – 41.1%] | [8.1 – 10.6%]  | [0.63 – 10.7%] | [0.28 – 2.7%]  | [0.64 – 10.8%] | [0.28 – 2.7%]  |
| NV    | [22.6 – 31.8%] | [46.2 – 47.2%] | [11.2 – 17.1%] | [10.7 – 11.4%] | [41.7 – 50.8%] | [28.6 – 28.9%] | [7.1 – 10.6%]  | [11.4 – 11.7%] | [0.79 – 6.8%]  | [0.63 – 2.5%]  |
| NH    | [52.5 – 95.9%] | [93.1 – 97.8%] | [1.6 – 38.6%]  | [0.78 – 5.5%]  | [0.57 – 27.1%] | [0.62 – 5.3%]  | [1.5 – 36.9%]  | [0.62 – 5.3%]  | [0.00 – 13.8%] | [0.00 – 1.4%]  |
| NJ    | [29.3 – 30.8%] | [55.1 – 55.2%] | [23.2 – 24.6%] | [17.3 – 17.4%] | [38.3 – 40.2%] | [21.0 – 21.2%] | [5.8 – 7.8%]   | [6.0 – 6.2%]   | [0.09 – 0.97%] | [0.04 – 0.23%] |
| NM    | [8.4 – 17.4%]  | [27.9 – 29.5%] | [0.45 – 5.3%]  | [0.33 – 2.0%]  | [29.8 – 36.7%] | [34.9 – 35.8%] | [0.08 – 1.5%]  | [0.22 – 1.9%]  | [48.5 – 57.0%] | [34.8 – 35.7%] |
| NY    | [22.8 – 28.4%] | [43.1 – 45.9%] | [26.5 – 31.7%] | [22.7 – 25.4%] | [36.2 – 41.2%] | [23.9 – 26.6%] | [8.1 – 12.9%]  | [7.3 – 10.0%]  | [0.04 – 4.0%]  | [0.06 – 2.8%]  |
| NC    | [31.4 – 38.6%] | [57.5 – 58.6%] | [34.6 – 40.9%] | [30.6 – 31.4%] | [21.3 – 29.0%] | [8.5 – 9.6%]   | [1.0 – 8.4%]   | [1.3 – 2.5%]   | [0.42 – 4.7%]  | [0.76 – 1.9%]  |
| ND    | [43.2 – 80.1%] | [87.9 – 92.2%] | [0.44 – 14.0%] | [0.27 – 4.6%]  | [2.5 – 32.6%]  | [0.63 – 4.9%]  | [0.01 – 7.8%]  | [0.27 – 4.6%]  | [12.6 – 40.0%] | [6.3 – 10.6%]  |
| OH    | [65.9 – 71.1%] | [83.2 – 83.4%] | [22.3 – 27.6%] | [13.7 – 14.1%] | [3.7 – 6.3%]   | [1.6 – 1.9%]   | [1.0 – 4.0%]   | [0.95 – 1.3%]  | [0.11 – 1.4%]  | [0.04 – 0.42%] |
| OK    | [43.9 – 61.5%] | [73.0 – 74.1%] | [6.0 – 12.9%]  | [5.8 – 6.4%]   | [10.4 – 21.1%] | [5.8 – 6.7%]   | [0.70 – 6.0%]  | [0.86 – 2.0%]  | [14.3 – 20.9%] | [10.3 – 10.6%] |
| OR    | [35.5 – 56.1%] | [75.9 – 78.2%] | [1.9 – 22.4%]  | [0.63 – 4.7%]  | [27.6 – 46.0%] | [14.3 – 16.6%] | [1.4 – 12.2%]  | [3.9 – 6.9%]   | [1.1 – 16.1%]  | [0.54 – 4.6%]  |
| PA    | [53.6 – 58.2%] | [77.9 – 78.3%] | [25.4 – 29.6%] | [15.0 – 15.4%] | [12.2 – 15.3%] | [4.6 – 5.0%]   | [2.5 – 5.5%]   | [2.0 – 2.4%]   | [0.00 – 1.4%]  | [0.02 – 0.39%] |
| RI    | [40.4 – 71.4%] | [82.7 – 84.4%] | [8.8 – 36.2%]  | [5.7 – 8.0%]   | [12.2 – 44.6%] | [8.1 – 10.7%]  | [2.1 – 29.0%]  | [0.49 – 3.1%]  | [0.00 – 9.8%]  | [0.14 – 1.9%]  |
| SC    | [33.9 – 41.1%] | [59.6 – 60.1%] | [46.8 – 54.9%] | [36.3 – 36.8%] | [7.5 – 10.4%]  | [2.5 – 3.1%]   | [0.28 – 3.4%]  | [0.32 – 1.4%]  | [0.13 – 1.7%]  | [0.09 – 0.97%] |
| SD    | [42.5 – 67.9%] | [85.3 – 86.5%] | [0.95 – 13.4%] | [0.30 – 2.7%]  | [3.0 – 28.5%]  | [0.60 – 3.1%]  | [1.4 – 17.6%]  | [0.45 – 3.0%]  | [20.4 – 45.5%] | [10.6 – 12.4%] |
| TN    | [53.4 – 60.1%] | [76.2 – 76.7%] | [28.9 – 33.4%] | [19.2 – 19.7%] | [8.9 – 14.7%]  | [3.4 – 4.0%]   | [0.49 – 3.9%]  | [0.47 – 1.0%]  | [0.13 – 2.2%]  | [0.05 – 0.63%] |
| TX    | [19.7 – 21.8%] | [36.6 – 36.9%] | [11.5 – 13.0%] | [10.2 – 10.5%] | [64.5 – 66.8%] | [50.8 – 51.1%] | [1.3 – 2.2%]   | [1.8 – 2.1%]   | [0.18 – 1.3%]  | [0.16 – 0.45%] |
| UT    | [36.1 – 63.2%] | [70.0 – 71.2%] | [0.35 – 6.6%]  | [0.39 – 3.5%]  | [17.9 – 40.2%] | [15.9 – 17.8%] | [1.1 – 11.2%]  | [2.1 – 4.6%]   | [3.5 – 18.1%]  | [2.8 – 5.9%]   |
| VA    | [33.6 – 40.9%] | [61.5 – 62.3%] | [33.7 – 40.2%] | [25.3 – 26.1%] | [20.6 – 27.4%] | [8.4 – 9.2%]   | [2.7 – 7.3%]   | [3.7 – 4.5%]   | [0.06 – 2.8%]  | [0.08 – 0.88%] |
| WA    | [35.3 – 49.3%] | [70.5 – 72.0%] | [3.4 – 13.1%]  | [3.0 – 4.5%]   | [27.3 – 39.7%] | [13.4 – 14.9%] | [5.3 – 15.8%]  | [6.8 – 8.3%]   | [4.4 – 12.3%]  | [2.5 – 3.9%]   |
| WV    | [79.8 – 95.8%] | [94.7 – 96.9%] | [2.8 – 16.4%]  | [2.3 – 4.5%]   | [0.01 – 2.4%]  | [0.26 – 2.4%]  | [0.64 – 9.0%]  | [0.26 – 2.4%]  | [0.33 – 5.8%]  | [0.26 – 2.4%]  |
| WI    | [55.3 – 66.3%] | [84.2 – 84.7%] | [10.9 – 21.2%] | [6.7 – 7.3%]   | [15.5 – 22.3%] | [5.7 – 6.0%]   | [3.1 – 7.7%]   | [1.5 – 1.8%]   | [1.9 – 7.4%]   | [1.1 – 1.7%]   |

**Table S3:** Conservative 95% interval estimates of the percentage of total COVID-19-attributable YPLL before age 75 and intervals denoting the entire plausible range of the percentage of total COVID-19 deaths for NH Whites, NH Blacks, Hispanics, NH Asians, and NH AIAN's in the U.S. and in each examined state with respect to cumulative COVID-19 deaths according to data from the National Center for Health Statistics as of 30 December 2020.
