# Supplementary material for: Racial and Ethnic Disparities in Years of Potential Life Lost Attributable to COVID-19 in the United States: An Analysis of 45 States and the District of Columbia
Source: Int J Environ Res Public Health. 2021 Mar 12;18(6):2921. doi: 10.3390/ijerph18062921 (PMC8000338; doi:10.3390/ijerph18062921)
Supplement: Supplementary file 1 [file ijerph-18-02921-s001.zip]

Archive with 8 entries (8 files):
- Supplementary Materials/File S1.xlsx
- Supplementary Materials/File S2.xlsx
- Supplementary Materials/File S3.txt
- Supplementary Materials/Table S1.pdf
- Supplementary Materials/Table S2.pdf
- Supplementary Materials/Table S3.pdf
- Supplementary Materials/Table S4.pdf
- Supplementary Materials/Table S5.pdf
