# Supplementary material for: Racial and Ethnic Disparities in Years of Potential Life Lost Attributable to COVID-19 in the United States: An Analysis of 45 States and the District of Columbia
Source: Int J Environ Res Public Health. 2021 Mar 12;18(6):2921. doi: 10.3390/ijerph18062921 (PMC8000338; doi:10.3390/ijerph18062921)
Supplement: Supplementary file 1 [file ijerph-18-02921-s001.zip › Supplementary Materials/File S1.xlsx]

## Sheet: File S1
Data as of	Start week	End Week	State	Age group	Race and Hispanic Origin Group	COVID-19 Deaths	Total Deaths	Pneumonia Deaths	Pneumonia and COVID-19 Deaths	Influenza Deaths	Pneumonia, Influenza, or COVID-19 Deaths	Footnote
2020-12-30	2020-02-01	2020-12-26	United States	All Ages	Total Deaths	301679	2902664	285361	138917	6946	453994
2020-12-30	2020-02-01	2020-12-26	United States	All Ages	Non-Hispanic White	177636	2134497	185552	76307	4616	291205
2020-12-30	2020-02-01	2020-12-26	United States	Under 1 year	Non-Hispanic White	10	6505	60	1	10	79
2020-12-30	2020-02-01	2020-12-26	United States	0-17 years	Non-Hispanic White	38	12165	186	7	68	285
2020-12-30	2020-02-01	2020-12-26	United States	1-4 years	Non-Hispanic White	6	1305	39	1	20	64
2020-12-30	2020-02-01	2020-12-26	United States	5-14 years	Non-Hispanic White	13	2213	55	2	29	95
2020-12-30	2020-02-01	2020-12-26	United States	15-24 years	Non-Hispanic White	103	14080	259	36	31	356
2020-12-30	2020-02-01	2020-12-26	United States	18-29 years	Non-Hispanic White	245	26541	571	93	48	769
2020-12-30	2020-02-01	2020-12-26	United States	25-34 years	Non-Hispanic White	417	34092	896	180	71	1202
2020-12-30	2020-02-01	2020-12-26	United States	30-49 years	Non-Hispanic White	2568	108025	4343	1103	288	6091
2020-12-30	2020-02-01	2020-12-26	United States	35-44 years	Non-Hispanic White	1006	50885	1873	414	123	2586
2020-12-30	2020-02-01	2020-12-26	United States	45-54 years	Non-Hispanic White	3771	97593	5709	1742	308	8036
2020-12-30	2020-02-01	2020-12-26	United States	50-64 years	Non-Hispanic White	16051	309473	22790	7724	950	32012
2020-12-30	2020-02-01	2020-12-26	United States	55-64 years	Non-Hispanic White	13576	249531	18999	6551	762	26739
2020-12-30	2020-02-01	2020-12-26	United States	65-74 years	Non-Hispanic White	32638	415183	39050	15746	1010	56876
2020-12-30	2020-02-01	2020-12-26	United States	75-84 years	Non-Hispanic White	53257	547595	55361	24270	1129	85414
2020-12-30	2020-02-01	2020-12-26	United States	85 years and over	Non-Hispanic White	72839	715515	63251	27364	1123	109758
2020-12-30	2020-02-01	2020-12-26	United States	All Ages	Non-Hispanic Black	51054	380588	41235	23760	1026	69230
2020-12-30	2020-02-01	2020-12-26	United States	Under 1 year	Non-Hispanic Black	8	4603	49	1	3	59
2020-12-30	2020-02-01	2020-12-26	United States	0-17 years	Non-Hispanic Black	38	7649	116	5	21	170
2020-12-30	2020-02-01	2020-12-26	United States	1-4 years	Non-Hispanic Black	4	751	29	2	5	36
2020-12-30	2020-02-01	2020-12-26	United States	5-14 years	Non-Hispanic Black	14	1166	30	2	13	55
2020-12-30	2020-02-01	2020-12-26	United States	15-24 years	Non-Hispanic Black	137	8168	144	47	7	239
2020-12-30	2020-02-01	2020-12-26	United States	18-29 years	Non-Hispanic Black	310	13905	356	130	24	556
2020-12-30	2020-02-01	2020-12-26	United States	25-34 years	Non-Hispanic Black	554	14614	546	241	39	891
2020-12-30	2020-02-01	2020-12-26	United States	30-49 years	Non-Hispanic Black	3122	39791	2635	1346	125	4507
2020-12-30	2020-02-01	2020-12-26	United States	35-44 years	Non-Hispanic Black	1379	18622	1225	592	51	2057
2020-12-30	2020-02-01	2020-12-26	United States	45-54 years	Non-Hispanic Black	3589	32490	2901	1626	125	4947
2020-12-30	2020-02-01	2020-12-26	United States	50-64 years	Non-Hispanic Black	11095	88568	9270	5177	310	15392
2020-12-30	2020-02-01	2020-12-26	United States	55-64 years	Non-Hispanic Black	8880	69499	7453	4147	237	12341
2020-12-30	2020-02-01	2020-12-26	United States	65-74 years	Non-Hispanic Black	13785	87449	11092	6622	248	18427
2020-12-30	2020-02-01	2020-12-26	United States	75-84 years	Non-Hispanic Black	12872	75854	10187	6216	169	16943
2020-12-30	2020-02-01	2020-12-26	United States	85 years and over	Non-Hispanic Black	9832	67372	7579	4264	129	13235
2020-12-30	2020-02-01	2020-12-26	United States	All Ages	Non-Hispanic American Indian or Alaska Native	3318	20184	2851	1812	71	4427
2020-12-30	2020-02-01	2020-12-26	United States	Under 1 year	Non-Hispanic American Indian or Alaska Native	0	145	4	0	0	4
2020-12-30	2020-02-01	2020-12-26	United States	0-17 years	Non-Hispanic American Indian or Alaska Native	3	355	9	0	3	15
2020-12-30	2020-02-01	2020-12-26	United States	1-4 years	Non-Hispanic American Indian or Alaska Native	1	57	4	0	1	6
2020-12-30	2020-02-01	2020-12-26	United States	5-14 years	Non-Hispanic American Indian or Alaska Native	1	67	0	0	1	2
2020-12-30	2020-02-01	2020-12-26	United States	15-24 years	Non-Hispanic American Indian or Alaska Native	15	492	13	10	1	19
2020-12-30	2020-02-01	2020-12-26	United States	18-29 years	Non-Hispanic American Indian or Alaska Native	51	977	42	29	0	64
2020-12-30	2020-02-01	2020-12-26	United States	25-34 years	Non-Hispanic American Indian or Alaska Native	116	1361	88	58	2	148
2020-12-30	2020-02-01	2020-12-26	United States	30-49 years	Non-Hispanic American Indian or Alaska Native	418	3540	343	227	11	545
2020-12-30	2020-02-01	2020-12-26	United States	35-44 years	Non-Hispanic American Indian or Alaska Native	188	1712	161	102	8	255
2020-12-30	2020-02-01	2020-12-26	United States	45-54 years	Non-Hispanic American Indian or Alaska Native	368	2372	320	206	6	488
2020-12-30	2020-02-01	2020-12-26	United States	50-64 years	Non-Hispanic American Indian or Alaska Native	889	5151	824	511	21	1223
2020-12-30	2020-02-01	2020-12-26	United States	55-64 years	Non-Hispanic American Indian or Alaska Native	672	3817	628	391	16	925
2020-12-30	2020-02-01	2020-12-26	United States	65-74 years	Non-Hispanic American Indian or Alaska Native	869	4148	724	487	19	1124
2020-12-30	2020-02-01	2020-12-26	United States	75-84 years	Non-Hispanic American Indian or Alaska Native	690	3606	566	363	8	901
2020-12-30	2020-02-01	2020-12-26	United States	85 years and over	Non-Hispanic American Indian or Alaska Native	398	2407	343	195	9	555
2020-12-30	2020-02-01	2020-12-26	United States	All Ages	Non-Hispanic Asian	10725	78653	10127	5215	283	15800
2020-12-30	2020-02-01	2020-12-26	United States	Under 1 year	Non-Hispanic Asian	2	436	4	1	1	6
2020-12-30	2020-02-01	2020-12-26	United States	0-17 years	Non-Hispanic Asian	7	794	19	1	6	31
2020-12-30	2020-02-01	2020-12-26	United States	1-4 years	Non-Hispanic Asian	0	97	4	0	3	7
2020-12-30	2020-02-01	2020-12-26	United States	5-14 years	Non-Hispanic Asian	4	153	7	0	1	12
2020-12-30	2020-02-01	2020-12-26	United States	15-24 years	Non-Hispanic Asian	12	712	26	6	2	34
2020-12-30	2020-02-01	2020-12-26	United States	18-29 years	Non-Hispanic Asian	38	1180	46	18	5	70
2020-12-30	2020-02-01	2020-12-26	United States	25-34 years	Non-Hispanic Asian	82	1289	56	32	8	111
2020-12-30	2020-02-01	2020-12-26	United States	30-49 years	Non-Hispanic Asian	459	4733	362	200	17	631
2020-12-30	2020-02-01	2020-12-26	United States	35-44 years	Non-Hispanic Asian	197	2192	162	79	4	283
2020-12-30	2020-02-01	2020-12-26	United States	45-54 years	Non-Hispanic Asian	556	4419	399	243	24	724
2020-12-30	2020-02-01	2020-12-26	United States	50-64 years	Non-Hispanic Asian	1755	11323	1321	810	74	2304
2020-12-30	2020-02-01	2020-12-26	United States	55-64 years	Non-Hispanic Asian	1406	8732	1090	668	59	1859
2020-12-30	2020-02-01	2020-12-26	United States	65-74 years	Non-Hispanic Asian	2543	14699	2193	1297	68	3469
2020-12-30	2020-02-01	2020-12-26	United States	75-84 years	Non-Hispanic Asian	2788	19372	2795	1426	63	4197
2020-12-30	2020-02-01	2020-12-26	United States	85 years and over	Non-Hispanic Asian	3135	26552	3391	1463	50	5098
2020-12-30	2020-02-01	2020-12-26	United States	All Ages	Non-Hispanic Native Hawaiian or Other Pacific Islander	535	3809	474	298	8	719
2020-12-30	2020-02-01	2020-12-26	United States	Under 1 year	Non-Hispanic Native Hawaiian or Other Pacific Islander	1	61	2	0	0	3
2020-12-30	2020-02-01	2020-12-26	United States	0-17 years	Non-Hispanic Native Hawaiian or Other Pacific Islander	2	105	7	0	0	9
2020-12-30	2020-02-01	2020-12-26	United States	1-4 years	Non-Hispanic Native Hawaiian or Other Pacific Islander	0	16	2	0	0	2
2020-12-30	2020-02-01	2020-12-26	United States	5-14 years	Non-Hispanic Native Hawaiian or Other Pacific Islander	0	18	3	0	0	3
2020-12-30	2020-02-01	2020-12-26	United States	15-24 years	Non-Hispanic Native Hawaiian or Other Pacific Islander	5	74	3	2	0	6
2020-12-30	2020-02-01	2020-12-26	United States	18-29 years	Non-Hispanic Native Hawaiian or Other Pacific Islander	13	144	12	8	0	17
2020-12-30	2020-02-01	2020-12-26	United States	25-34 years	Non-Hispanic Native Hawaiian or Other Pacific Islander	23	179	15	12	1	27
2020-12-30	2020-02-01	2020-12-26	United States	30-49 years	Non-Hispanic Native Hawaiian or Other Pacific Islander	84	599	61	43	4	106
2020-12-30	2020-02-01	2020-12-26	United States	35-44 years	Non-Hispanic Native Hawaiian or Other Pacific Islander	40	269	34	24	2	52
2020-12-30	2020-02-01	2020-12-26	United States	45-54 years	Non-Hispanic Native Hawaiian or Other Pacific Islander	79	509	58	39	1	99
2020-12-30	2020-02-01	2020-12-26	United States	50-64 years	Non-Hispanic Native Hawaiian or Other Pacific Islander	193	1052	159	109	1	244
2020-12-30	2020-02-01	2020-12-26	United States	55-64 years	Non-Hispanic Native Hawaiian or Other Pacific Islander	144	774	122	83	1	184
2020-12-30	2020-02-01	2020-12-26	United States	65-74 years	Non-Hispanic Native Hawaiian or Other Pacific Islander	133	841	118	80	1	172
2020-12-30	2020-02-01	2020-12-26	United States	75-84 years	Non-Hispanic Native Hawaiian or Other Pacific Islander	76	659	78	44	0	110
2020-12-30	2020-02-01	2020-12-26	United States	85 years and over	Non-Hispanic Native Hawaiian or Other Pacific Islander	34	409	39	14	2	61
2020-12-30	2020-02-01	2020-12-26	United States	All Ages	Non-Hispanic More than one race	854	13363	991	421	37	1459
2020-12-30	2020-02-01	2020-12-26	United States	Under 1 year	Non-Hispanic More than one race	0	583	6	0	0	6
2020-12-30	2020-02-01	2020-12-26	United States	0-17 years	Non-Hispanic More than one race	2	927	11	0	6	19
2020-12-30	2020-02-01	2020-12-26	United States	1-4 years	Non-Hispanic More than one race	2	105	1	0	4	7
2020-12-30	2020-02-01	2020-12-26	United States	5-14 years	Non-Hispanic More than one race	0	140	4	0	2	6
2020-12-30	2020-02-01	2020-12-26	United States	15-24 years	Non-Hispanic More than one race	4	615	5	0	0	9
2020-12-30	2020-02-01	2020-12-26	United States	18-29 years	Non-Hispanic More than one race	9	1002	15	3	0	21
2020-12-30	2020-02-01	2020-12-26	United States	25-34 years	Non-Hispanic More than one race	15	959	23	8	0	30
2020-12-30	2020-02-01	2020-12-26	United States	30-49 years	Non-Hispanic More than one race	56	1920	82	27	4	115
2020-12-30	2020-02-01	2020-12-26	United States	35-44 years	Non-Hispanic More than one race	21	900	33	12	2	44
2020-12-30	2020-02-01	2020-12-26	United States	45-54 years	Non-Hispanic More than one race	59	1231	76	30	8	112
2020-12-30	2020-02-01	2020-12-26	United States	50-64 years	Non-Hispanic More than one race	163	2766	194	85	17	288
2020-12-30	2020-02-01	2020-12-26	United States	55-64 years	Non-Hispanic More than one race	129	2082	154	65	11	229
2020-12-30	2020-02-01	2020-12-26	United States	65-74 years	Non-Hispanic More than one race	222	2458	265	123	3	366
2020-12-30	2020-02-01	2020-12-26	United States	75-84 years	Non-Hispanic More than one race	218	2281	224	101	4	345
2020-12-30	2020-02-01	2020-12-26	United States	85 years and over	Non-Hispanic More than one race	184	2009	200	82	3	305
2020-12-30	2020-02-01	2020-12-26	United States	All Ages	Hispanic	56097	263404	43066	30478	873	69246
2020-12-30	2020-02-01	2020-12-26	United States	Under 1 year	Hispanic	10	3591	30	3	2	39
2020-12-30	2020-02-01	2020-12-26	United States	0-17 years	Hispanic	55	6324	94	13	21	157
2020-12-30	2020-02-01	2020-12-26	United States	1-4 years	Hispanic	6	632	17	0	10	33
2020-12-30	2020-02-01	2020-12-26	United States	5-14 years	Hispanic	19	1049	32	5	7	53
2020-12-30	2020-02-01	2020-12-26	United States	15-24 years	Hispanic	205	6778	175	70	14	323
2020-12-30	2020-02-01	2020-12-26	United States	18-29 years	Hispanic	510	10931	412	208	24	736
2020-12-30	2020-02-01	2020-12-26	United States	25-34 years	Hispanic	872	10921	650	398	33	1154
2020-12-30	2020-02-01	2020-12-26	United States	30-49 years	Hispanic	5583	31423	3664	2699	129	6634
2020-12-30	2020-02-01	2020-12-26	United States	35-44 years	Hispanic	2544	15070	1644	1196	62	3032
2020-12-30	2020-02-01	2020-12-26	United States	45-54 years	Hispanic	5996	24640	4015	3066	119	7023
2020-12-30	2020-02-01	2020-12-26	United States	50-64 years	Hispanic	14437	55045	10272	7790	257	17086
2020-12-30	2020-02-01	2020-12-26	United States	55-64 years	Hispanic	10933	41042	7879	5972	184	12956
2020-12-30	2020-02-01	2020-12-26	United States	65-74 years	Hispanic	13743	49809	10342	7796	162	16385
2020-12-30	2020-02-01	2020-12-26	United States	75-84 years	Hispanic	12340	53449	10053	7011	164	15478
2020-12-30	2020-02-01	2020-12-26	United States	85 years and over	Hispanic	9429	56423	8229	4961	116	12770
2020-12-30	2020-02-01	2020-12-26	United States	All Ages	Unknown	1460	8166	1065	626	32	1908
2020-12-30	2020-02-01	2020-12-26	United States	Under 1 year	Unknown	1	152	0	0	0	1
2020-12-30	2020-02-01	2020-12-26	United States	0-17 years	Unknown	2	169	1	1	0	2
2020-12-30	2020-02-01	2020-12-26	United States	1-4 years	Unknown	0	6	0	0	0	0
2020-12-30	2020-02-01	2020-12-26	United States	5-14 years	Unknown	0	4	0	0	0	0
2020-12-30	2020-02-01	2020-12-26	United States	15-24 years	Unknown	2	56	2	1	0	3
2020-12-30	2020-02-01	2020-12-26	United States	18-29 years	Unknown	4	107	2	1	2	6
2020-12-30	2020-02-01	2020-12-26	United States	25-34 years	Unknown	8	139	4	2	2	11
2020-12-30	2020-02-01	2020-12-26	United States	30-49 years	Unknown	51	592	36	15	2	74
2020-12-30	2020-02-01	2020-12-26	United States	35-44 years	Unknown	23	272	19	10	1	33
2020-12-30	2020-02-01	2020-12-26	United States	45-54 years	Unknown	78	677	62	30	5	111
2020-12-30	2020-02-01	2020-12-26	United States	50-64 years	Unknown	296	2140	266	149	8	414
2020-12-30	2020-02-01	2020-12-26	United States	55-64 years	Unknown	241	1702	218	123	4	337
2020-12-30	2020-02-01	2020-12-26	United States	65-74 years	Unknown	422	2205	326	180	9	570
2020-12-30	2020-02-01	2020-12-26	United States	75-84 years	Unknown	405	1640	266	184	5	487
2020-12-30	2020-02-01	2020-12-26	United States	85 years and over	Unknown	280	1313	168	96	6	355
2020-12-30	2020-02-01	2020-12-26	Alabama	Under 1 year	Non-Hispanic White		119			0		One or more data cells have counts between 1-9 and have been suppressed in accordance with NCHS confidentiality standards.
2020-12-30	2020-02-01	2020-12-26	Alabama	0-17 years	Non-Hispanic White		264					One or more data cells have counts between 1-9 and have been suppressed in accordance with NCHS confidentiality standards.
2020-12-30	2020-02-01	2020-12-26	Alabama	1-4 years	Non-Hispanic White	0	42		0			One or more data cells have counts between 1-9 and have been suppressed in accordance with NCHS confidentiality standards.
2020-12-30	2020-02-01	2020-12-26	Alabama	5-14 years	Non-Hispanic White	0	46		0	0		One or more data cells have counts between 1-9 and have been suppressed in accordance with NCHS confidentiality standards.
2020-12-30	2020-02-01	2020-12-26	Alabama	15-24 years	Non-Hispanic White		322		0	0	11	One or more data cells have counts between 1-9 and have been suppressed in accordance with NCHS confidentiality standards.
2020-12-30	2020-02-01	2020-12-26	Alabama	18-29 years	Non-Hispanic White		508	10	0	0	19	One or more data cells have counts between 1-9 and have been suppressed in accordance with NCHS confidentiality standards.
2020-12-30	2020-02-01	2020-12-26	Alabama	25-34 years	Non-Hispanic White	10	641	20			29	One or more data cells have counts between 1-9 and have been suppressed in accordance with NCHS confidentiality standards.
2020-12-30	2020-02-01	2020-12-26	Alabama	30-49 years	Non-Hispanic White	68	2341	102	20		154	One or more data cells have counts between 1-9 and have been suppressed in accordance with NCHS confidentiality standards.
2020-12-30	2020-02-01	2020-12-26	Alabama	35-44 years	Non-Hispanic White	31	1082	49			73	One or more data cells have counts between 1-9 and have been suppressed in accordance with NCHS confidentiality standards.
2020-12-30	2020-02-01	2020-12-26	Alabama	45-54 years	Non-Hispanic White	99	2245	117	33		191	One or more data cells have counts between 1-9 and have been suppressed in accordance with NCHS confidentiality standards.
2020-12-30	2020-02-01	2020-12-26	Alabama	50-64 years	Non-Hispanic White	399	6723	477	122	24	778
2020-12-30	2020-02-01	2020-12-26	Alabama	55-64 years	Non-Hispanic White	331	5339	397	98	17	647
2020-12-30	2020-02-01	2020-12-26	Alabama	65-74 years	Non-Hispanic White	811	8477	755	283	18	1301
2020-12-30	2020-02-01	2020-12-26	Alabama	75-84 years	Non-Hispanic White	1102	11013	989	382	14	1722
2020-12-30	2020-02-01	2020-12-26	Alabama	85 years and over	Non-Hispanic White	1041	10745	815	317	10	1547
2020-12-30	2020-02-01	2020-12-26	Alabama	Under 1 year	Non-Hispanic Black	0	142	0	0	0	0
2020-12-30	2020-02-01	2020-12-26	Alabama	0-17 years	Non-Hispanic Black	0	216		0	0		One or more data cells have counts between 1-9 and have been suppressed in accordance with NCHS confidentiality standards.
2020-12-30	2020-02-01	2020-12-26	Alabama	1-4 years	Non-Hispanic Black	0	23	0	0	0	0
2020-12-30	2020-02-01	2020-12-26	Alabama	5-14 years	Non-Hispanic Black	0	29		0	0		One or more data cells have counts between 1-9 and have been suppressed in accordance with NCHS confidentiality standards.
2020-12-30	2020-02-01	2020-12-26	Alabama	15-24 years	Non-Hispanic Black		265		0			One or more data cells have counts between 1-9 and have been suppressed in accordance with NCHS confidentiality standards.
2020-12-30	2020-02-01	2020-12-26	Alabama	18-29 years	Non-Hispanic Black	12	456	11			21	One or more data cells have counts between 1-9 and have been suppressed in accordance with NCHS confidentiality standards.
2020-12-30	2020-02-01	2020-12-26	Alabama	25-34 years	Non-Hispanic Black	25	467	22	13		37	One or more data cells have counts between 1-9 and have been suppressed in accordance with NCHS confidentiality standards.
2020-12-30	2020-02-01	2020-12-26	Alabama	30-49 years	Non-Hispanic Black	134	1362	88	40		185	One or more data cells have counts between 1-9 and have been suppressed in accordance with NCHS confidentiality standards.
2020-12-30	2020-02-01	2020-12-26	Alabama	35-44 years	Non-Hispanic Black	66	679	46	21		92	One or more data cells have counts between 1-9 and have been suppressed in accordance with NCHS confidentiality standards.
2020-12-30	2020-02-01	2020-12-26	Alabama	45-54 years	Non-Hispanic Black	155	1075	78	39		197	One or more data cells have counts between 1-9 and have been suppressed in accordance with NCHS confidentiality standards.
2020-12-30	2020-02-01	2020-12-26	Alabama	50-64 years	Non-Hispanic Black	438	3152	277	130		593	One or more data cells have counts between 1-9 and have been suppressed in accordance with NCHS confidentiality standards.
2020-12-30	2020-02-01	2020-12-26	Alabama	55-64 years	Non-Hispanic Black	336	2506	226	102		466	One or more data cells have counts between 1-9 and have been suppressed in accordance with NCHS confidentiality standards.
2020-12-30	2020-02-01	2020-12-26	Alabama	65-74 years	Non-Hispanic Black	477	3214	309	143	10	652
2020-12-30	2020-02-01	2020-12-26	Alabama	75-84 years	Non-Hispanic Black	351	2570	236	127		461	One or more data cells have counts between 1-9 and have been suppressed in accordance with NCHS confidentiality standards.
2020-12-30	2020-02-01	2020-12-26	Alabama	85 years and over	Non-Hispanic Black	243	2151	158	75		327	One or more data cells have counts between 1-9 and have been suppressed in accordance with NCHS confidentiality standards.
2020-12-30	2020-02-01	2020-12-26	Alabama	Under 1 year	Non-Hispanic American Indian or Alaska Native	0		0	0	0	0	One or more data cells have counts between 1-9 and have been suppressed in accordance with NCHS confidentiality standards.
2020-12-30	2020-02-01	2020-12-26	Alabama	0-17 years	Non-Hispanic American Indian or Alaska Native	0		0	0	0	0	One or more data cells have counts between 1-9 and have been suppressed in accordance with NCHS confidentiality standards.
2020-12-30	2020-02-01	2020-12-26	Alabama	1-4 years	Non-Hispanic American Indian or Alaska Native	0	0	0	0	0	0
2020-12-30	2020-02-01	2020-12-26	Alabama	5-14 years	Non-Hispanic American Indian or Alaska Native	0		0	0	0	0	One or more data cells have counts between 1-9 and have been suppressed in accordance with NCHS confidentiality standards.
2020-12-30	2020-02-01	2020-12-26	Alabama	15-24 years	Non-Hispanic American Indian or Alaska Native	0		0	0	0	0	One or more data cells have counts between 1-9 and have been suppressed in accordance with NCHS confidentiality standards.
2020-12-30	2020-02-01	2020-12-26	Alabama	18-29 years	Non-Hispanic American Indian or Alaska Native	0		0	0	0	0	One or more data cells have counts between 1-9 and have been suppressed in accordance with NCHS confidentiality standards.
2020-12-30	2020-02-01	2020-12-26	Alabama	25-34 years	Non-Hispanic American Indian or Alaska Native	0		0	0	0	0	One or more data cells have counts between 1-9 and have been suppressed in accordance with NCHS confidentiality standards.
2020-12-30	2020-02-01	2020-12-26	Alabama	30-49 years	Non-Hispanic American Indian or Alaska Native		21			0		One or more data cells have counts between 1-9 and have been suppressed in accordance with NCHS confidentiality standards.
2020-12-30	2020-02-01	2020-12-26	Alabama	35-44 years	Non-Hispanic American Indian or Alaska Native	0		0	0	0	0	One or more data cells have counts between 1-9 and have been suppressed in accordance with NCHS confidentiality standards.
2020-12-30	2020-02-01	2020-12-26	Alabama	45-54 years	Non-Hispanic American Indian or Alaska Native		11			0		One or more data cells have counts between 1-9 and have been suppressed in accordance with NCHS confidentiality standards.
2020-12-30	2020-02-01	2020-12-26	Alabama	50-64 years	Non-Hispanic American Indian or Alaska Native		17					One or more data cells have counts between 1-9 and have been suppressed in accordance with NCHS confidentiality standards.
2020-12-30	2020-02-01	2020-12-26	Alabama	55-64 years	Non-Hispanic American Indian or Alaska Native		14					One or more data cells have counts between 1-9 and have been suppressed in accordance with NCHS confidentiality standards.
2020-12-30	2020-02-01	2020-12-26	Alabama	65-74 years	Non-Hispanic American Indian or Alaska Native		16		0	0		One or more data cells have counts between 1-9 and have been suppressed in accordance with NCHS confidentiality standards.
2020-12-30	2020-02-01	2020-12-26	Alabama	75-84 years	Non-Hispanic American Indian or Alaska Native		25			0		One or more data cells have counts between 1-9 and have been suppressed in accordance with NCHS confidentiality standards.
2020-12-30	2020-02-01	2020-12-26	Alabama	85 years and over	Non-Hispanic American Indian or Alaska Native	0			0	0		One or more data cells have counts between 1-9 and have been suppressed in accordance with NCHS confidentiality standards.
2020-12-30	2020-02-01	2020-12-26	Alabama	Under 1 year	Non-Hispanic Asian	0		0	0	0	0	One or more data cells have counts between 1-9 and have been suppressed in accordance with NCHS confidentiality standards.
2020-12-30	2020-02-01	2020-12-26	Alabama	0-17 years	Non-Hispanic Asian	0		0	0	0	0	One or more data cells have counts between 1-9 and have been suppressed in accordance with NCHS confidentiality standards.
2020-12-30	2020-02-01	2020-12-26	Alabama	1-4 years	Non-Hispanic Asian	0		0	0	0	0	One or more data cells have counts between 1-9 and have been suppressed in accordance with NCHS confidentiality standards.
2020-12-30	2020-02-01	2020-12-26	Alabama	5-14 years	Non-Hispanic Asian	0	0	0	0	0	0
2020-12-30	2020-02-01	2020-12-26	Alabama	15-24 years	Non-Hispanic Asian	0		0	0	0	0	One or more data cells have counts between 1-9 and have been suppressed in accordance with NCHS confidentiality standards.
2020-12-30	2020-02-01	2020-12-26	Alabama	18-29 years	Non-Hispanic Asian	0		0	0	0	0	One or more data cells have counts between 1-9 and have been suppressed in accordance with NCHS confidentiality standards.
2020-12-30	2020-02-01	2020-12-26	Alabama	25-34 years	Non-Hispanic Asian	0		0	0	0	0	One or more data cells have counts between 1-9 and have been suppressed in accordance with NCHS confidentiality standards.
2020-12-30	2020-02-01	2020-12-26	Alabama	30-49 years	Non-Hispanic Asian		19			0		One or more data cells have counts between 1-9 and have been suppressed in accordance with NCHS confidentiality standards.
2020-12-30	2020-02-01	2020-12-26	Alabama	35-44 years	Non-Hispanic Asian		11			0		One or more data cells have counts between 1-9 and have been suppressed in accordance with NCHS confidentiality standards.
2020-12-30	2020-02-01	2020-12-26	Alabama	45-54 years	Non-Hispanic Asian		13			0		One or more data cells have counts between 1-9 and have been suppressed in accordance with NCHS confidentiality standards.
2020-12-30	2020-02-01	2020-12-26	Alabama	50-64 years	Non-Hispanic Asian		28			0		One or more data cells have counts between 1-9 and have been suppressed in accordance with NCHS confidentiality standards.
2020-12-30	2020-02-01	2020-12-26	Alabama	55-64 years	Non-Hispanic Asian		21		0	0		One or more data cells have counts between 1-9 and have been suppressed in accordance with NCHS confidentiality standards.
2020-12-30	2020-02-01	2020-12-26	Alabama	65-74 years	Non-Hispanic Asian		51			0	14	One or more data cells have counts between 1-9 and have been suppressed in accordance with NCHS confidentiality standards.
2020-12-30	2020-02-01	2020-12-26	Alabama	75-84 years	Non-Hispanic Asian		52		0	0		One or more data cells have counts between 1-9 and have been suppressed in accordance with NCHS confidentiality standards.
2020-12-30	2020-02-01	2020-12-26	Alabama	85 years and over	Non-Hispanic Asian		51			0		One or more data cells have counts between 1-9 and have been suppressed in accordance with NCHS confidentiality standards.
2020-12-30	2020-02-01	2020-12-26	Alabama	Under 1 year	Non-Hispanic Native Hawaiian or Other Pacific Islander	0	0	0	0	0	0
2020-12-30	2020-02-01	2020-12-26	Alabama	0-17 years	Non-Hispanic Native Hawaiian or Other Pacific Islander	0	0	0	0	0	0
2020-12-30	2020-02-01	2020-12-26	Alabama	1-4 years	Non-Hispanic Native Hawaiian or Other Pacific Islander	0	0	0	0	0	0
2020-12-30	2020-02-01	2020-12-26	Alabama	5-14 years	Non-Hispanic Native Hawaiian or Other Pacific Islander	0	0	0	0	0	0
2020-12-30	2020-02-01	2020-12-26	Alabama	15-24 years	Non-Hispanic Native Hawaiian or Other Pacific Islander	0	0	0	0	0	0
2020-12-30	2020-02-01	2020-12-26	Alabama	18-29 years	Non-Hispanic Native Hawaiian or Other Pacific Islander	0		0	0	0	0	One or more data cells have counts between 1-9 and have been suppressed in accordance with NCHS confidentiality standards.
2020-12-30	2020-02-01	2020-12-26	Alabama	25-34 years	Non-Hispanic Native Hawaiian or Other Pacific Islander	0		0	0	0	0	One or more data cells have counts between 1-9 and have been suppressed in accordance with NCHS confidentiality standards.
2020-12-30	2020-02-01	2020-12-26	Alabama	30-49 years	Non-Hispanic Native Hawaiian or Other Pacific Islander	0		0	0	0	0	One or more data cells have counts between 1-9 and have been suppressed in accordance with NCHS confidentiality standards.
2020-12-30	2020-02-01	2020-12-26	Alabama	35-44 years	Non-Hispanic Native Hawaiian or Other Pacific Islander	0	0	0	0	0	0
2020-12-30	2020-02-01	2020-12-26	Alabama	45-54 years	Non-Hispanic Native Hawaiian or Other Pacific Islander	0		0	0	0	0	One or more data cells have counts between 1-9 and have been suppressed in accordance with NCHS confidentiality standards.
2020-12-30	2020-02-01	2020-12-26	Alabama	50-64 years	Non-Hispanic Native Hawaiian or Other Pacific Islander	0		0	0	0	0	One or more data cells have counts between 1-9 and have been suppressed in accordance with NCHS confidentiality standards.
2020-12-30	2020-02-01	2020-12-26	Alabama	55-64 years	Non-Hispanic Native Hawaiian or Other Pacific Islander	0		0	0	0	0	One or more data cells have counts between 1-9 and have been suppressed in accordance with NCHS confidentiality standards.
2020-12-30	2020-02-01	2020-12-26	Alabama	65-74 years	Non-Hispanic Native Hawaiian or Other Pacific Islander	0	0	0	0	0	0
2020-12-30	2020-02-01	2020-12-26	Alabama	75-84 years	Non-Hispanic Native Hawaiian or Other Pacific Islander	0		0	0	0	0	One or more data cells have counts between 1-9 and have been suppressed in accordance with NCHS confidentiality standards.
2020-12-30	2020-02-01	2020-12-26	Alabama	85 years and over	Non-Hispanic Native Hawaiian or Other Pacific Islander					0		One or more data cells have counts between 1-9 and have been suppressed in accordance with NCHS confidentiality standards.
2020-12-30	2020-02-01	2020-12-26	Alabama	Under 1 year	Non-Hispanic More than one race	0		0	0	0	0	One or more data cells have counts between 1-9 and have been suppressed in accordance with NCHS confidentiality standards.
2020-12-30	2020-02-01	2020-12-26	Alabama	0-17 years	Non-Hispanic More than one race	0	12	0	0	0	0
2020-12-30	2020-02-01	2020-12-26	Alabama	1-4 years	Non-Hispanic More than one race	0		0	0	0	0	One or more data cells have counts between 1-9 and have been suppressed in accordance with NCHS confidentiality standards.
2020-12-30	2020-02-01	2020-12-26	Alabama	5-14 years	Non-Hispanic More than one race	0		0	0	0	0	One or more data cells have counts between 1-9 and have been suppressed in accordance with NCHS confidentiality standards.
2020-12-30	2020-02-01	2020-12-26	Alabama	15-24 years	Non-Hispanic More than one race	0		0	0	0	0	One or more data cells have counts between 1-9 and have been suppressed in accordance with NCHS confidentiality standards.
2020-12-30	2020-02-01	2020-12-26	Alabama	18-29 years	Non-Hispanic More than one race	0		0	0	0	0	One or more data cells have counts between 1-9 and have been suppressed in accordance with NCHS confidentiality standards.
2020-12-30	2020-02-01	2020-12-26	Alabama	25-34 years	Non-Hispanic More than one race	0		0	0	0	0	One or more data cells have counts between 1-9 and have been suppressed in accordance with NCHS confidentiality standards.
2020-12-30	2020-02-01	2020-12-26	Alabama	30-49 years	Non-Hispanic More than one race					0		One or more data cells have counts between 1-9 and have been suppressed in accordance with NCHS confidentiality standards.
2020-12-30	2020-02-01	2020-12-26	Alabama	35-44 years	Non-Hispanic More than one race	0		0	0	0	0	One or more data cells have counts between 1-9 and have been suppressed in accordance with NCHS confidentiality standards.
2020-12-30	2020-02-01	2020-12-26	Alabama	45-54 years	Non-Hispanic More than one race					0		One or more data cells have counts between 1-9 and have been suppressed in accordance with NCHS confidentiality standards.
2020-12-30	2020-02-01	2020-12-26	Alabama	50-64 years	Non-Hispanic More than one race		10			0		One or more data cells have counts between 1-9 and have been suppressed in accordance with NCHS confidentiality standards.
2020-12-30	2020-02-01	2020-12-26	Alabama	55-64 years	Non-Hispanic More than one race					0		One or more data cells have counts between 1-9 and have been suppressed in accordance with NCHS confidentiality standards.
2020-12-30	2020-02-01	2020-12-26	Alabama	65-74 years	Non-Hispanic More than one race	0		0	0	0	0	One or more data cells have counts between 1-9 and have been suppressed in accordance with NCHS confidentiality standards.
2020-12-30	2020-02-01	2020-12-26	Alabama	75-84 years	Non-Hispanic More than one race				0	0		One or more data cells have counts between 1-9 and have been suppressed in accordance with NCHS confidentiality standards.
2020-12-30	2020-02-01	2020-12-26	Alabama	85 years and over	Non-Hispanic More than one race	0		0	0	0	0	One or more data cells have counts between 1-9 and have been suppressed in accordance with NCHS confidentiality standards.
2020-12-30	2020-02-01	2020-12-26	Alabama	Under 1 year	Hispanic		30	0	0			One or more data cells have counts between 1-9 and have been suppressed in accordance with NCHS confidentiality standards.
2020-12-30	2020-02-01	2020-12-26	Alabama	0-17 years	Hispanic		41	0	0			One or more data cells have counts between 1-9 and have been suppressed in accordance with NCHS confidentiality standards.
2020-12-30	2020-02-01	2020-12-26	Alabama	1-4 years	Hispanic	0		0	0	0	0	One or more data cells have counts between 1-9 and have been suppressed in accordance with NCHS confidentiality standards.
2020-12-30	2020-02-01	2020-12-26	Alabama	5-14 years	Hispanic	0		0	0	0	0	One or more data cells have counts between 1-9 and have been suppressed in accordance with NCHS confidentiality standards.
2020-12-30	2020-02-01	2020-12-26	Alabama	15-24 years	Hispanic	0	28	0	0	0	0
2020-12-30	2020-02-01	2020-12-26	Alabama	18-29 years	Hispanic		48			0		One or more data cells have counts between 1-9 and have been suppressed in accordance with NCHS confidentiality standards.
2020-12-30	2020-02-01	2020-12-26	Alabama	25-34 years	Hispanic		53			0		One or more data cells have counts between 1-9 and have been suppressed in accordance with NCHS confidentiality standards.
2020-12-30	2020-02-01	2020-12-26	Alabama	30-49 years	Hispanic	19	108	12		0	24	One or more data cells have counts between 1-9 and have been suppressed in accordance with NCHS confidentiality standards.
2020-12-30	2020-02-01	2020-12-26	Alabama	35-44 years	Hispanic		40			0		One or more data cells have counts between 1-9 and have been suppressed in accordance with NCHS confidentiality standards.
2020-12-30	2020-02-01	2020-12-26	Alabama	45-54 years	Hispanic	30	85	13	10	0	33
2020-12-30	2020-02-01	2020-12-26	Alabama	50-64 years	Hispanic	52	133	18	15	0	55
2020-12-30	2020-02-01	2020-12-26	Alabama	55-64 years	Hispanic	34	87	12		0	37	One or more data cells have counts between 1-9 and have been suppressed in accordance with NCHS confidentiality standards.
2020-12-30	2020-02-01	2020-12-26	Alabama	65-74 years	Hispanic	20	84				22	One or more data cells have counts between 1-9 and have been suppressed in accordance with NCHS confidentiality standards.
2020-12-30	2020-02-01	2020-12-26	Alabama	75-84 years	Hispanic	15	67			0	18	One or more data cells have counts between 1-9 and have been suppressed in accordance with NCHS confidentiality standards.
2020-12-30	2020-02-01	2020-12-26	Alabama	85 years and over	Hispanic		60			0	10	One or more data cells have counts between 1-9 and have been suppressed in accordance with NCHS confidentiality standards.
2020-12-30	2020-02-01	2020-12-26	Alabama	Under 1 year	Unknown	0		0	0	0	0	One or more data cells have counts between 1-9 and have been suppressed in accordance with NCHS confidentiality standards.
2020-12-30	2020-02-01	2020-12-26	Alabama	0-17 years	Unknown	0		0	0	0	0	One or more data cells have counts between 1-9 and have been suppressed in accordance with NCHS confidentiality standards.
2020-12-30	2020-02-01	2020-12-26	Alabama	1-4 years	Unknown	0	0	0	0	0	0
2020-12-30	2020-02-01	2020-12-26	Alabama	5-14 years	Unknown	0	0	0	0	0	0
2020-12-30	2020-02-01	2020-12-26	Alabama	15-24 years	Unknown	0	0	0	0	0	0
2020-12-30	2020-02-01	2020-12-26	Alabama	18-29 years	Unknown	0	0	0	0	0	0
2020-12-30	2020-02-01	2020-12-26	Alabama	25-34 years	Unknown	0	0	0	0	0	0
2020-12-30	2020-02-01	2020-12-26	Alabama	30-49 years	Unknown	0			0			One or more data cells have counts between 1-9 and have been suppressed in accordance with NCHS confidentiality standards.
2020-12-30	2020-02-01	2020-12-26	Alabama	35-44 years	Unknown	0		0	0			One or more data cells have counts between 1-9 and have been suppressed in accordance with NCHS confidentiality standards.
2020-12-30	2020-02-01	2020-12-26	Alabama	45-54 years	Unknown	0			0	0		One or more data cells have counts between 1-9 and have been suppressed in accordance with NCHS confidentiality standards.
2020-12-30	2020-02-01	2020-12-26	Alabama	50-64 years	Unknown		15		0	0		One or more data cells have counts between 1-9 and have been suppressed in accordance with NCHS confidentiality standards.
2020-12-30	2020-02-01	2020-12-26	Alabama	55-64 years	Unknown		13		0	0		One or more data cells have counts between 1-9 and have been suppressed in accordance with NCHS confidentiality standards.
2020-12-30	2020-02-01	2020-12-26	Alabama	65-74 years	Unknown	0	18		0	0		One or more data cells have counts between 1-9 and have been suppressed in accordance with NCHS confidentiality standards.
2020-12-30	2020-02-01	2020-12-26	Alabama	75-84 years	Unknown		18		0	0		One or more data cells have counts between 1-9 and have been suppressed in accordance with NCHS confidentiality standards.
2020-12-30	2020-02-01	2020-12-26	Alabama	85 years and over	Unknown					0		One or more data cells have counts between 1-9 and have been suppressed in accordance with NCHS confidentiality standards.
2020-12-30	2020-02-01	2020-12-26	Alaska	Under 1 year	Non-Hispanic White	0		0	0	0	0	One or more data cells have counts between 1-9 and have been suppressed in accordance with NCHS confidentiality standards.
2020-12-30	2020-02-01	2020-12-26	Alaska	0-17 years	Non-Hispanic White	0	25	0	0	0	0
2020-12-30	2020-02-01	2020-12-26	Alaska	1-4 years	Non-Hispanic White	0		0	0	0	0	One or more data cells have counts between 1-9 and have been suppressed in accordance with NCHS confidentiality standards.
2020-12-30	2020-02-01	2020-12-26	Alaska	5-14 years	Non-Hispanic White	0	10	0	0	0	0
2020-12-30	2020-02-01	2020-12-26	Alaska	15-24 years	Non-Hispanic White	0	40	0	0	0	0
2020-12-30	2020-02-01	2020-12-26	Alaska	18-29 years	Non-Hispanic White	0	54		0	0		One or more data cells have counts between 1-9 and have been suppressed in accordance with NCHS confidentiality standards.
2020-12-30	2020-02-01	2020-12-26	Alaska	25-34 years	Non-Hispanic White		56		0	0		One or more data cells have counts between 1-9 and have been suppressed in accordance with NCHS confidentiality standards.
2020-12-30	2020-02-01	2020-12-26	Alaska	30-49 years	Non-Hispanic White		193		0	0		One or more data cells have counts between 1-9 and have been suppressed in accordance with NCHS confidentiality standards.
2020-12-30	2020-02-01	2020-12-26	Alaska	35-44 years	Non-Hispanic White	0	96		0	0		One or more data cells have counts between 1-9 and have been suppressed in accordance with NCHS confidentiality standards.
2020-12-30	2020-02-01	2020-12-26	Alaska	45-54 years	Non-Hispanic White	0	155		0	0		One or more data cells have counts between 1-9 and have been suppressed in accordance with NCHS confidentiality standards.
2020-12-30	2020-02-01	2020-12-26	Alaska	50-64 years	Non-Hispanic White		496	15			17	One or more data cells have counts between 1-9 and have been suppressed in accordance with NCHS confidentiality standards.
2020-12-30	2020-02-01	2020-12-26	Alaska	55-64 years	Non-Hispanic White		403	11			13	One or more data cells have counts between 1-9 and have been suppressed in accordance with NCHS confidentiality standards.
2020-12-30	2020-02-01	2020-12-26	Alaska	65-74 years	Non-Hispanic White	10	573	21			29	One or more data cells have counts between 1-9 and have been suppressed in accordance with NCHS confidentiality standards.
2020-12-30	2020-02-01	2020-12-26	Alaska	75-84 years	Non-Hispanic White	17	621	21			33	One or more data cells have counts between 1-9 and have been suppressed in accordance with NCHS confidentiality standards.
2020-12-30	2020-02-01	2020-12-26	Alaska	85 years and over	Non-Hispanic White	20	544	32	11		42	One or more data cells have counts between 1-9 and have been suppressed in accordance with NCHS confidentiality standards.
2020-12-30	2020-02-01	2020-12-26	Alaska	Under 1 year	Non-Hispanic Black	0		0	0	0	0	One or more data cells have counts between 1-9 and have been suppressed in accordance with NCHS confidentiality standards.
2020-12-30	2020-02-01	2020-12-26	Alaska	0-17 years	Non-Hispanic Black	0		0	0	0	0	One or more data cells have counts between 1-9 and have been suppressed in accordance with NCHS confidentiality standards.
2020-12-30	2020-02-01	2020-12-26	Alaska	1-4 years	Non-Hispanic Black	0	0	0	0	0	0
2020-12-30	2020-02-01	2020-12-26	Alaska	5-14 years	Non-Hispanic Black	0	0	0	0	0	0
2020-12-30	2020-02-01	2020-12-26	Alaska	15-24 years	Non-Hispanic Black	0		0	0	0	0	One or more data cells have counts between 1-9 and have been suppressed in accordance with NCHS confidentiality standards.
2020-12-30	2020-02-01	2020-12-26	Alaska	18-29 years	Non-Hispanic Black	0		0	0	0	0	One or more data cells have counts between 1-9 and have been suppressed in accordance with NCHS confidentiality standards.
2020-12-30	2020-02-01	2020-12-26	Alaska	25-34 years	Non-Hispanic Black	0		0	0	0	0	One or more data cells have counts between 1-9 and have been suppressed in accordance with NCHS confidentiality standards.
2020-12-30	2020-02-01	2020-12-26	Alaska	30-49 years	Non-Hispanic Black		22		0	0		One or more data cells have counts between 1-9 and have been suppressed in accordance with NCHS confidentiality standards.
2020-12-30	2020-02-01	2020-12-26	Alaska	35-44 years	Non-Hispanic Black	0	14		0	0		One or more data cells have counts between 1-9 and have been suppressed in accordance with NCHS confidentiality standards.
2020-12-30	2020-02-01	2020-12-26	Alaska	45-54 years	Non-Hispanic Black			0	0	0		One or more data cells have counts between 1-9 and have been suppressed in accordance with NCHS confidentiality standards.
2020-12-30	2020-02-01	2020-12-26	Alaska	50-64 years	Non-Hispanic Black	0	26		0	0		One or more data cells have counts between 1-9 and have been suppressed in accordance with NCHS confidentiality standards.
2020-12-30	2020-02-01	2020-12-26	Alaska	55-64 years	Non-Hispanic Black	0	21		0	0		One or more data cells have counts between 1-9 and have been suppressed in accordance with NCHS confidentiality standards.
2020-12-30	2020-02-01	2020-12-26	Alaska	65-74 years	Non-Hispanic Black		37			0		One or more data cells have counts between 1-9 and have been suppressed in accordance with NCHS confidentiality standards.
2020-12-30	2020-02-01	2020-12-26	Alaska	75-84 years	Non-Hispanic Black		12			0		One or more data cells have counts between 1-9 and have been suppressed in accordance with NCHS confidentiality standards.
2020-12-30	2020-02-01	2020-12-26	Alaska	85 years and over	Non-Hispanic Black	0	12	0	0	0	0
2020-12-30	2020-02-01	2020-12-26	Alaska	Under 1 year	Non-Hispanic American Indian or Alaska Native	0		0	0	0	0	One or more data cells have counts between 1-9 and have been suppressed in accordance with NCHS confidentiality standards.
2020-12-30	2020-02-01	2020-12-26	Alaska	0-17 years	Non-Hispanic American Indian or Alaska Native	0	29		0			One or more data cells have counts between 1-9 and have been suppressed in accordance with NCHS confidentiality standards.
2020-12-30	2020-02-01	2020-12-26	Alaska	1-4 years	Non-Hispanic American Indian or Alaska Native	0			0			One or more data cells have counts between 1-9 and have been suppressed in accordance with NCHS confidentiality standards.
2020-12-30	2020-02-01	2020-12-26	Alaska	5-14 years	Non-Hispanic American Indian or Alaska Native	0		0	0	0	0	One or more data cells have counts between 1-9 and have been suppressed in accordance with NCHS confidentiality standards.
2020-12-30	2020-02-01	2020-12-26	Alaska	15-24 years	Non-Hispanic American Indian or Alaska Native		36			0		One or more data cells have counts between 1-9 and have been suppressed in accordance with NCHS confidentiality standards.
2020-12-30	2020-02-01	2020-12-26	Alaska	18-29 years	Non-Hispanic American Indian or Alaska Native		71			0		One or more data cells have counts between 1-9 and have been suppressed in accordance with NCHS confidentiality standards.
2020-12-30	2020-02-01	2020-12-26	Alaska	25-34 years	Non-Hispanic American Indian or Alaska Native		85			0		One or more data cells have counts between 1-9 and have been suppressed in accordance with NCHS confidentiality standards.
2020-12-30	2020-02-01	2020-12-26	Alaska	30-49 years	Non-Hispanic American Indian or Alaska Native		175	14		0	16	One or more data cells have counts between 1-9 and have been suppressed in accordance with NCHS confidentiality standards.
2020-12-30	2020-02-01	2020-12-26	Alaska	35-44 years	Non-Hispanic American Indian or Alaska Native		90			0	10	One or more data cells have counts between 1-9 and have been suppressed in accordance with NCHS confidentiality standards.
2020-12-30	2020-02-01	2020-12-26	Alaska	45-54 years	Non-Hispanic American Indian or Alaska Native		96			0		One or more data cells have counts between 1-9 and have been suppressed in accordance with NCHS confidentiality standards.
2020-12-30	2020-02-01	2020-12-26	Alaska	50-64 years	Non-Hispanic American Indian or Alaska Native	10	224	20		0	27	One or more data cells have counts between 1-9 and have been suppressed in accordance with NCHS confidentiality standards.
2020-12-30	2020-02-01	2020-12-26	Alaska	55-64 years	Non-Hispanic American Indian or Alaska Native		171	17		0	23	One or more data cells have counts between 1-9 and have been suppressed in accordance with NCHS confidentiality standards.
2020-12-30	2020-02-01	2020-12-26	Alaska	65-74 years	Non-Hispanic American Indian or Alaska Native	14	169	15		0	20	One or more data cells have counts between 1-9 and have been suppressed in accordance with NCHS confidentiality standards.
2020-12-30	2020-02-01	2020-12-26	Alaska	75-84 years	Non-Hispanic American Indian or Alaska Native	14	161	20	11	0	23
2020-12-30	2020-02-01	2020-12-26	Alaska	85 years and over	Non-Hispanic American Indian or Alaska Native		114	18		0	19	One or more data cells have counts between 1-9 and have been suppressed in accordance with NCHS confidentiality standards.
2020-12-30	2020-02-01	2020-12-26	Alaska	Under 1 year	Non-Hispanic Asian	0		0	0	0	0	One or more data cells have counts between 1-9 and have been suppressed in accordance with NCHS confidentiality standards.
2020-12-30	2020-02-01	2020-12-26	Alaska	0-17 years	Non-Hispanic Asian	0		0	0	0	0	One or more data cells have counts between 1-9 and have been suppressed in accordance with NCHS confidentiality standards.
2020-12-30	2020-02-01	2020-12-26	Alaska	1-4 years	Non-Hispanic Asian	0	0	0	0	0	0
2020-12-30	2020-02-01	2020-12-26	Alaska	5-14 years	Non-Hispanic Asian	0		0	0	0	0	One or more data cells have counts between 1-9 and have been suppressed in accordance with NCHS confidentiality standards.
2020-12-30	2020-02-01	2020-12-26	Alaska	15-24 years	Non-Hispanic Asian	0		0	0	0	0	One or more data cells have counts between 1-9 and have been suppressed in accordance with NCHS confidentiality standards.
2020-12-30	2020-02-01	2020-12-26	Alaska	18-29 years	Non-Hispanic Asian	0		0	0	0	0	One or more data cells have counts between 1-9 and have been suppressed in accordance with NCHS confidentiality standards.
2020-12-30	2020-02-01	2020-12-26	Alaska	25-34 years	Non-Hispanic Asian	0		0	0	0	0	One or more data cells have counts between 1-9 and have been suppressed in accordance with NCHS confidentiality standards.
2020-12-30	2020-02-01	2020-12-26	Alaska	30-49 years	Non-Hispanic Asian		14	0	0	0		One or more data cells have counts between 1-9 and have been suppressed in accordance with NCHS confidentiality standards.
2020-12-30	2020-02-01	2020-12-26	Alaska	35-44 years	Non-Hispanic Asian			0	0	0		One or more data cells have counts between 1-9 and have been suppressed in accordance with NCHS confidentiality standards.
2020-12-30	2020-02-01	2020-12-26	Alaska	45-54 years	Non-Hispanic Asian		11	0	0	0		One or more data cells have counts between 1-9 and have been suppressed in accordance with NCHS confidentiality standards.
2020-12-30	2020-02-01	2020-12-26	Alaska	50-64 years	Non-Hispanic Asian		23			0		One or more data cells have counts between 1-9 and have been suppressed in accordance with NCHS confidentiality standards.
2020-12-30	2020-02-01	2020-12-26	Alaska	55-64 years	Non-Hispanic Asian		17			0		One or more data cells have counts between 1-9 and have been suppressed in accordance with NCHS confidentiality standards.
2020-12-30	2020-02-01	2020-12-26	Alaska	65-74 years	Non-Hispanic Asian		41			0		One or more data cells have counts between 1-9 and have been suppressed in accordance with NCHS confidentiality standards.
2020-12-30	2020-02-01	2020-12-26	Alaska	75-84 years	Non-Hispanic Asian		33			0		One or more data cells have counts between 1-9 and have been suppressed in accordance with NCHS confidentiality standards.
2020-12-30	2020-02-01	2020-12-26	Alaska	85 years and over	Non-Hispanic Asian		31					One or more data cells have counts between 1-9 and have been suppressed in accordance with NCHS confidentiality standards.
2020-12-30	2020-02-01	2020-12-26	Alaska	Under 1 year	Non-Hispanic Native Hawaiian or Other Pacific Islander	0		0	0	0	0	One or more data cells have counts between 1-9 and have been suppressed in accordance with NCHS confidentiality standards.
2020-12-30	2020-02-01	2020-12-26	Alaska	0-17 years	Non-Hispanic Native Hawaiian or Other Pacific Islander	0		0	0	0	0	One or more data cells have counts between 1-9 and have been suppressed in accordance with NCHS confidentiality standards.
2020-12-30	2020-02-01	2020-12-26	Alaska	1-4 years	Non-Hispanic Native Hawaiian or Other Pacific Islander	0	0	0	0	0	0
2020-12-30	2020-02-01	2020-12-26	Alaska	5-14 years	Non-Hispanic Native Hawaiian or Other Pacific Islander	0	0	0	0	0	0
2020-12-30	2020-02-01	2020-12-26	Alaska	15-24 years	Non-Hispanic Native Hawaiian or Other Pacific Islander	0		0	0	0	0	One or more data cells have counts between 1-9 and have been suppressed in accordance with NCHS confidentiality standards.
2020-12-30	2020-02-01	2020-12-26	Alaska	18-29 years	Non-Hispanic Native Hawaiian or Other Pacific Islander	0		0	0	0	0	One or more data cells have counts between 1-9 and have been suppressed in accordance with NCHS confidentiality standards.
2020-12-30	2020-02-01	2020-12-26	Alaska	25-34 years	Non-Hispanic Native Hawaiian or Other Pacific Islander	0		0	0	0	0	One or more data cells have counts between 1-9 and have been suppressed in accordance with NCHS confidentiality standards.
2020-12-30	2020-02-01	2020-12-26	Alaska	30-49 years	Non-Hispanic Native Hawaiian or Other Pacific Islander		10			0		One or more data cells have counts between 1-9 and have been suppressed in accordance with NCHS confidentiality standards.
2020-12-30	2020-02-01	2020-12-26	Alaska	35-44 years	Non-Hispanic Native Hawaiian or Other Pacific Islander					0		One or more data cells have counts between 1-9 and have been suppressed in accordance with NCHS confidentiality standards.
2020-12-30	2020-02-01	2020-12-26	Alaska	45-54 years	Non-Hispanic Native Hawaiian or Other Pacific Islander					0		One or more data cells have counts between 1-9 and have been suppressed in accordance with NCHS confidentiality standards.
2020-12-30	2020-02-01	2020-12-26	Alaska	50-64 years	Non-Hispanic Native Hawaiian or Other Pacific Islander		21			0		One or more data cells have counts between 1-9 and have been suppressed in accordance with NCHS confidentiality standards.
2020-12-30	2020-02-01	2020-12-26	Alaska	55-64 years	Non-Hispanic Native Hawaiian or Other Pacific Islander		17			0		One or more data cells have counts between 1-9 and have been suppressed in accordance with NCHS confidentiality standards.
2020-12-30	2020-02-01	2020-12-26	Alaska	65-74 years	Non-Hispanic Native Hawaiian or Other Pacific Islander		10			0		One or more data cells have counts between 1-9 and have been suppressed in accordance with NCHS confidentiality standards.
2020-12-30	2020-02-01	2020-12-26	Alaska	75-84 years	Non-Hispanic Native Hawaiian or Other Pacific Islander	0		0	0	0	0	One or more data cells have counts between 1-9 and have been suppressed in accordance with NCHS confidentiality standards.
2020-12-30	2020-02-01	2020-12-26	Alaska	85 years and over	Non-Hispanic Native Hawaiian or Other Pacific Islander			0	0	0		One or more data cells have counts between 1-9 and have been suppressed in accordance with NCHS confidentiality standards.
2020-12-30	2020-02-01	2020-12-26	Alaska	Under 1 year	Non-Hispanic More than one race	0		0	0	0	0	One or more data cells have counts between 1-9 and have been suppressed in accordance with NCHS confidentiality standards.
2020-12-30	2020-02-01	2020-12-26	Alaska	0-17 years	Non-Hispanic More than one race	0		0	0	0	0	One or more data cells have counts between 1-9 and have been suppressed in accordance with NCHS confidentiality standards.
2020-12-30	2020-02-01	2020-12-26	Alaska	1-4 years	Non-Hispanic More than one race	0	0	0	0	0	0
2020-12-30	2020-02-01	2020-12-26	Alaska	5-14 years	Non-Hispanic More than one race	0		0	0	0	0	One or more data cells have counts between 1-9 and have been suppressed in accordance with NCHS confidentiality standards.
2020-12-30	2020-02-01	2020-12-26	Alaska	15-24 years	Non-Hispanic More than one race	0	13	0	0	0	0
2020-12-30	2020-02-01	2020-12-26	Alaska	18-29 years	Non-Hispanic More than one race	0	16		0	0		One or more data cells have counts between 1-9 and have been suppressed in accordance with NCHS confidentiality standards.
2020-12-30	2020-02-01	2020-12-26	Alaska	25-34 years	Non-Hispanic More than one race	0	17		0	0		One or more data cells have counts between 1-9 and have been suppressed in accordance with NCHS confidentiality standards.
2020-12-30	2020-02-01	2020-12-26	Alaska	30-49 years	Non-Hispanic More than one race	0	37	0	0	0	0
2020-12-30	2020-02-01	2020-12-26	Alaska	35-44 years	Non-Hispanic More than one race	0	13	0	0	0	0
2020-12-30	2020-02-01	2020-12-26	Alaska	45-54 years	Non-Hispanic More than one race	0	21	0	0	0	0
2020-12-30	2020-02-01	2020-12-26	Alaska	50-64 years	Non-Hispanic More than one race	0	32		0	0		One or more data cells have counts between 1-9 and have been suppressed in accordance with NCHS confidentiality standards.
2020-12-30	2020-02-01	2020-12-26	Alaska	55-64 years	Non-Hispanic More than one race	0	24		0	0		One or more data cells have counts between 1-9 and have been suppressed in accordance with NCHS confidentiality standards.
2020-12-30	2020-02-01	2020-12-26	Alaska	65-74 years	Non-Hispanic More than one race		24			0		One or more data cells have counts between 1-9 and have been suppressed in accordance with NCHS confidentiality standards.
2020-12-30	2020-02-01	2020-12-26	Alaska	75-84 years	Non-Hispanic More than one race	0	23	0	0	0	0
2020-12-30	2020-02-01	2020-12-26	Alaska	85 years and over	Non-Hispanic More than one race		17			0		One or more data cells have counts between 1-9 and have been suppressed in accordance with NCHS confidentiality standards.
2020-12-30	2020-02-01	2020-12-26	Alaska	Under 1 year	Hispanic	0		0	0	0	0	One or more data cells have counts between 1-9 and have been suppressed in accordance with NCHS confidentiality standards.
2020-12-30	2020-02-01	2020-12-26	Alaska	0-17 years	Hispanic	0		0	0	0	0	One or more data cells have counts between 1-9 and have been suppressed in accordance with NCHS confidentiality standards.
2020-12-30	2020-02-01	2020-12-26	Alaska	1-4 years	Hispanic	0	0	0	0	0	0
2020-12-30	2020-02-01	2020-12-26	Alaska	5-14 years	Hispanic	0		0	0	0	0	One or more data cells have counts between 1-9 and have been suppressed in accordance with NCHS confidentiality standards.
2020-12-30	2020-02-01	2020-12-26	Alaska	15-24 years	Hispanic	0		0	0	0	0	One or more data cells have counts between 1-9 and have been suppressed in accordance with NCHS confidentiality standards.
2020-12-30	2020-02-01	2020-12-26	Alaska	18-29 years	Hispanic	0	10	0	0	0	0
2020-12-30	2020-02-01	2020-12-26	Alaska	25-34 years	Hispanic	0		0	0	0	0	One or more data cells have counts between 1-9 and have been suppressed in accordance with NCHS confidentiality standards.
2020-12-30	2020-02-01	2020-12-26	Alaska	30-49 years	Hispanic	0			0	0		One or more data cells have counts between 1-9 and have been suppressed in accordance with NCHS confidentiality standards.
2020-12-30	2020-02-01	2020-12-26	Alaska	35-44 years	Hispanic	0			0	0		One or more data cells have counts between 1-9 and have been suppressed in accordance with NCHS confidentiality standards.
2020-12-30	2020-02-01	2020-12-26	Alaska	45-54 years	Hispanic	0		0	0	0	0	One or more data cells have counts between 1-9 and have been suppressed in accordance with NCHS confidentiality standards.
2020-12-30	2020-02-01	2020-12-26	Alaska	50-64 years	Hispanic		22	0	0	0		One or more data cells have counts between 1-9 and have been suppressed in accordance with NCHS confidentiality standards.
2020-12-30	2020-02-01	2020-12-26	Alaska	55-64 years	Hispanic		16	0	0	0		One or more data cells have counts between 1-9 and have been suppressed in accordance with NCHS confidentiality standards.
2020-12-30	2020-02-01	2020-12-26	Alaska	65-74 years	Hispanic	0	17	0	0	0	0
2020-12-30	2020-02-01	2020-12-26	Alaska	75-84 years	Hispanic	0	17	0	0	0	0
2020-12-30	2020-02-01	2020-12-26	Alaska	85 years and over	Hispanic	0	12		0	0		One or more data cells have counts between 1-9 and have been suppressed in accordance with NCHS confidentiality standards.
2020-12-30	2020-02-01	2020-12-26	Alaska	Under 1 year	Unknown	0	0	0	0	0	0
2020-12-30	2020-02-01	2020-12-26	Alaska	0-17 years	Unknown	0	0	0	0	0	0
2020-12-30	2020-02-01	2020-12-26	Alaska	1-4 years	Unknown	0	0	0	0	0	0
2020-12-30	2020-02-01	2020-12-26	Alaska	5-14 years	Unknown	0	0	0	0	0	0
2020-12-30	2020-02-01	2020-12-26	Alaska	15-24 years	Unknown	0	0	0	0	0	0
2020-12-30	2020-02-01	2020-12-26	Alaska	18-29 years	Unknown	0	0	0	0	0	0
2020-12-30	2020-02-01	2020-12-26	Alaska	25-34 years	Unknown	0	0	0	0	0	0
2020-12-30	2020-02-01	2020-12-26	Alaska	30-49 years	Unknown	0		0	0	0	0	One or more data cells have counts between 1-9 and have been suppressed in accordance with NCHS confidentiality standards.
2020-12-30	2020-02-01	2020-12-26	Alaska	35-44 years	Unknown	0	0	0	0	0	0
2020-12-30	2020-02-01	2020-12-26	Alaska	45-54 years	Unknown	0		0	0	0	0	One or more data cells have counts between 1-9 and have been suppressed in accordance with NCHS confidentiality standards.
2020-12-30	2020-02-01	2020-12-26	Alaska	50-64 years	Unknown	0		0	0	0	0	One or more data cells have counts between 1-9 and have been suppressed in accordance with NCHS confidentiality standards.
2020-12-30	2020-02-01	2020-12-26	Alaska	55-64 years	Unknown	0		0	0	0	0	One or more data cells have counts between 1-9 and have been suppressed in accordance with NCHS confidentiality standards.
2020-12-30	2020-02-01	2020-12-26	Alaska	65-74 years	Unknown	0			0	0		One or more data cells have counts between 1-9 and have been suppressed in accordance with NCHS confidentiality standards.
2020-12-30	2020-02-01	2020-12-26	Alaska	75-84 years	Unknown					0		One or more data cells have counts between 1-9 and have been suppressed in accordance with NCHS confidentiality standards.
2020-12-30	2020-02-01	2020-12-26	Alaska	85 years and over	Unknown	0		0	0	0	0	One or more data cells have counts between 1-9 and have been suppressed in accordance with NCHS confidentiality standards.
2020-12-30	2020-02-01	2020-12-26	Arizona	Under 1 year	Non-Hispanic White	0	112	0	0			One or more data cells have counts between 1-9 and have been suppressed in accordance with NCHS confidentiality standards.
2020-12-30	2020-02-01	2020-12-26	Arizona	0-17 years	Non-Hispanic White	0	239		0			One or more data cells have counts between 1-9 and have been suppressed in accordance with NCHS confidentiality standards.
2020-12-30	2020-02-01	2020-12-26	Arizona	1-4 years	Non-Hispanic White	0	33		0	0		One or more data cells have counts between 1-9 and have been suppressed in accordance with NCHS confidentiality standards.
2020-12-30	2020-02-01	2020-12-26	Arizona	5-14 years	Non-Hispanic White	0	49	0	0			One or more data cells have counts between 1-9 and have been suppressed in accordance with NCHS confidentiality standards.
2020-12-30	2020-02-01	2020-12-26	Arizona	15-24 years	Non-Hispanic White		314			0		One or more data cells have counts between 1-9 and have been suppressed in accordance with NCHS confidentiality standards.
2020-12-30	2020-02-01	2020-12-26	Arizona	18-29 years	Non-Hispanic White		567			0	13	One or more data cells have counts between 1-9 and have been suppressed in accordance with NCHS confidentiality standards.
2020-12-30	2020-02-01	2020-12-26	Arizona	25-34 years	Non-Hispanic White		700	19		0	22	One or more data cells have counts between 1-9 and have been suppressed in accordance with NCHS confidentiality standards.
2020-12-30	2020-02-01	2020-12-26	Arizona	30-49 years	Non-Hispanic White	52	2186	90	30		115	One or more data cells have counts between 1-9 and have been suppressed in accordance with NCHS confidentiality standards.
2020-12-30	2020-02-01	2020-12-26	Arizona	35-44 years	Non-Hispanic White	23	997	36	12		49	One or more data cells have counts between 1-9 and have been suppressed in accordance with NCHS confidentiality standards.
2020-12-30	2020-02-01	2020-12-26	Arizona	45-54 years	Non-Hispanic White	72	1944	112	40		151	One or more data cells have counts between 1-9 and have been suppressed in accordance with NCHS confidentiality standards.
2020-12-30	2020-02-01	2020-12-26	Arizona	50-64 years	Non-Hispanic White	333	6350	515	192	15	671
2020-12-30	2020-02-01	2020-12-26	Arizona	55-64 years	Non-Hispanic White	284	5193	442	166		569	One or more data cells have counts between 1-9 and have been suppressed in accordance with NCHS confidentiality standards.
2020-12-30	2020-02-01	2020-12-26	Arizona	65-74 years	Non-Hispanic White	684	9667	953	406	20	1251
2020-12-30	2020-02-01	2020-12-26	Arizona	75-84 years	Non-Hispanic White	1092	13173	1364	615	17	1858
2020-12-30	2020-02-01	2020-12-26	Arizona	85 years and over	Non-Hispanic White	1126	14683	1204	530	14	1814
2020-12-30	2020-02-01	2020-12-26	Arizona	Under 1 year	Non-Hispanic Black	0	44	0	0	0	0
2020-12-30	2020-02-01	2020-12-26	Arizona	0-17 years	Non-Hispanic Black	0	83	0	0	0	0
2020-12-30	2020-02-01	2020-12-26	Arizona	1-4 years	Non-Hispanic Black	0	11	0	0	0	0
2020-12-30	2020-02-01	2020-12-26	Arizona	5-14 years	Non-Hispanic Black	0		0	0	0	0	One or more data cells have counts between 1-9 and have been suppressed in accordance with NCHS confidentiality standards.
2020-12-30	2020-02-01	2020-12-26	Arizona	15-24 years	Non-Hispanic Black		107			0		One or more data cells have counts between 1-9 and have been suppressed in accordance with NCHS confidentiality standards.
2020-12-30	2020-02-01	2020-12-26	Arizona	18-29 years	Non-Hispanic Black		154			0		One or more data cells have counts between 1-9 and have been suppressed in accordance with NCHS confidentiality standards.
2020-12-30	2020-02-01	2020-12-26	Arizona	25-34 years	Non-Hispanic Black		151			0		One or more data cells have counts between 1-9 and have been suppressed in accordance with NCHS confidentiality standards.
2020-12-30	2020-02-01	2020-12-26	Arizona	30-49 years	Non-Hispanic Black	20	339	16		0	29	One or more data cells have counts between 1-9 and have been suppressed in accordance with NCHS confidentiality standards.
2020-12-30	2020-02-01	2020-12-26	Arizona	35-44 years	Non-Hispanic Black		149			0	13	One or more data cells have counts between 1-9 and have been suppressed in accordance with NCHS confidentiality standards.
2020-12-30	2020-02-01	2020-12-26	Arizona	45-54 years	Non-Hispanic Black	20	227	13		0	25	One or more data cells have counts between 1-9 and have been suppressed in accordance with NCHS confidentiality standards.
2020-12-30	2020-02-01	2020-12-26	Arizona	50-64 years	Non-Hispanic Black	59	590	63	32		92	One or more data cells have counts between 1-9 and have been suppressed in accordance with NCHS confidentiality standards.
2020-12-30	2020-02-01	2020-12-26	Arizona	55-64 years	Non-Hispanic Black	47	469	56	27		78	One or more data cells have counts between 1-9 and have been suppressed in accordance with NCHS confidentiality standards.
2020-12-30	2020-02-01	2020-12-26	Arizona	65-74 years	Non-Hispanic Black	53	517	60	32	0	81
2020-12-30	2020-02-01	2020-12-26	Arizona	75-84 years	Non-Hispanic Black	54	463	51	34	0	71
2020-12-30	2020-02-01	2020-12-26	Arizona	85 years and over	Non-Hispanic Black	32	318	26	13		46	One or more data cells have counts between 1-9 and have been suppressed in accordance with NCHS confidentiality standards.
2020-12-30	2020-02-01	2020-12-26	Arizona	Under 1 year	Non-Hispanic American Indian or Alaska Native	0	16		0	0		One or more data cells have counts between 1-9 and have been suppressed in accordance with NCHS confidentiality standards.
2020-12-30	2020-02-01	2020-12-26	Arizona	0-17 years	Non-Hispanic American Indian or Alaska Native		52		0	0		One or more data cells have counts between 1-9 and have been suppressed in accordance with NCHS confidentiality standards.
2020-12-30	2020-02-01	2020-12-26	Arizona	1-4 years	Non-Hispanic American Indian or Alaska Native				0	0		One or more data cells have counts between 1-9 and have been suppressed in accordance with NCHS confidentiality standards.
2020-12-30	2020-02-01	2020-12-26	Arizona	5-14 years	Non-Hispanic American Indian or Alaska Native		10	0	0	0		One or more data cells have counts between 1-9 and have been suppressed in accordance with NCHS confidentiality standards.
2020-12-30	2020-02-01	2020-12-26	Arizona	15-24 years	Non-Hispanic American Indian or Alaska Native		85			0		One or more data cells have counts between 1-9 and have been suppressed in accordance with NCHS confidentiality standards.
2020-12-30	2020-02-01	2020-12-26	Arizona	18-29 years	Non-Hispanic American Indian or Alaska Native	19	189	13	12	0	20
2020-12-30	2020-02-01	2020-12-26	Arizona	25-34 years	Non-Hispanic American Indian or Alaska Native	42	289	29	23		49	One or more data cells have counts between 1-9 and have been suppressed in accordance with NCHS confidentiality standards.
2020-12-30	2020-02-01	2020-12-26	Arizona	30-49 years	Non-Hispanic American Indian or Alaska Native	153	687	104	85		175	One or more data cells have counts between 1-9 and have been suppressed in accordance with NCHS confidentiality standards.
2020-12-30	2020-02-01	2020-12-26	Arizona	35-44 years	Non-Hispanic American Indian or Alaska Native	64	328	39	29		76	One or more data cells have counts between 1-9 and have been suppressed in accordance with NCHS confidentiality standards.
2020-12-30	2020-02-01	2020-12-26	Arizona	45-54 years	Non-Hispanic American Indian or Alaska Native	119	422	87	74	0	132
2020-12-30	2020-02-01	2020-12-26	Arizona	50-64 years	Non-Hispanic American Indian or Alaska Native	272	831	203	160		317	One or more data cells have counts between 1-9 and have been suppressed in accordance with NCHS confidentiality standards.
2020-12-30	2020-02-01	2020-12-26	Arizona	55-64 years	Non-Hispanic American Indian or Alaska Native	215	601	162	128		251	One or more data cells have counts between 1-9 and have been suppressed in accordance with NCHS confidentiality standards.
2020-12-30	2020-02-01	2020-12-26	Arizona	65-74 years	Non-Hispanic American Indian or Alaska Native	188	536	150	129		212	One or more data cells have counts between 1-9 and have been suppressed in accordance with NCHS confidentiality standards.
2020-12-30	2020-02-01	2020-12-26	Arizona	75-84 years	Non-Hispanic American Indian or Alaska Native	155	494	114	90		182	One or more data cells have counts between 1-9 and have been suppressed in accordance with NCHS confidentiality standards.
2020-12-30	2020-02-01	2020-12-26	Arizona	85 years and over	Non-Hispanic American Indian or Alaska Native	98	364	88	63		125	One or more data cells have counts between 1-9 and have been suppressed in accordance with NCHS confidentiality standards.
2020-12-30	2020-02-01	2020-12-26	Arizona	Under 1 year	Non-Hispanic Asian	0		0	0	0	0	One or more data cells have counts between 1-9 and have been suppressed in accordance with NCHS confidentiality standards.
2020-12-30	2020-02-01	2020-12-26	Arizona	0-17 years	Non-Hispanic Asian	0		0	0	0	0	One or more data cells have counts between 1-9 and have been suppressed in accordance with NCHS confidentiality standards.
2020-12-30	2020-02-01	2020-12-26	Arizona	1-4 years	Non-Hispanic Asian	0		0	0	0	0	One or more data cells have counts between 1-9 and have been suppressed in accordance with NCHS confidentiality standards.
2020-12-30	2020-02-01	2020-12-26	Arizona	5-14 years	Non-Hispanic Asian	0		0	0	0	0	One or more data cells have counts between 1-9 and have been suppressed in accordance with NCHS confidentiality standards.
2020-12-30	2020-02-01	2020-12-26	Arizona	15-24 years	Non-Hispanic Asian	0	10	0	0	0	0
2020-12-30	2020-02-01	2020-12-26	Arizona	18-29 years	Non-Hispanic Asian		13			0		One or more data cells have counts between 1-9 and have been suppressed in accordance with NCHS confidentiality standards.
2020-12-30	2020-02-01	2020-12-26	Arizona	25-34 years	Non-Hispanic Asian		13			0		One or more data cells have counts between 1-9 and have been suppressed in accordance with NCHS confidentiality standards.
2020-12-30	2020-02-01	2020-12-26	Arizona	30-49 years	Non-Hispanic Asian		59			0		One or more data cells have counts between 1-9 and have been suppressed in accordance with NCHS confidentiality standards.
2020-12-30	2020-02-01	2020-12-26	Arizona	35-44 years	Non-Hispanic Asian		33			0		One or more data cells have counts between 1-9 and have been suppressed in accordance with NCHS confidentiality standards.
2020-12-30	2020-02-01	2020-12-26	Arizona	45-54 years	Non-Hispanic Asian		52			0		One or more data cells have counts between 1-9 and have been suppressed in accordance with NCHS confidentiality standards.
2020-12-30	2020-02-01	2020-12-26	Arizona	50-64 years	Non-Hispanic Asian	24	151	16	11		30	One or more data cells have counts between 1-9 and have been suppressed in accordance with NCHS confidentiality standards.
2020-12-30	2020-02-01	2020-12-26	Arizona	55-64 years	Non-Hispanic Asian	19	117	14	11		23	One or more data cells have counts between 1-9 and have been suppressed in accordance with NCHS confidentiality standards.
2020-12-30	2020-02-01	2020-12-26	Arizona	65-74 years	Non-Hispanic Asian	29	166	25	15	0	39
2020-12-30	2020-02-01	2020-12-26	Arizona	75-84 years	Non-Hispanic Asian	31	227	30	17	0	44
2020-12-30	2020-02-01	2020-12-26	Arizona	85 years and over	Non-Hispanic Asian	23	264	31	12	0	42
2020-12-30	2020-02-01	2020-12-26	Arizona	Under 1 year	Non-Hispanic Native Hawaiian or Other Pacific Islander	0		0	0	0	0	One or more data cells have counts between 1-9 and have been suppressed in accordance with NCHS confidentiality standards.
2020-12-30	2020-02-01	2020-12-26	Arizona	0-17 years	Non-Hispanic Native Hawaiian or Other Pacific Islander	0		0	0	0	0	One or more data cells have counts between 1-9 and have been suppressed in accordance with NCHS confidentiality standards.
2020-12-30	2020-02-01	2020-12-26	Arizona	1-4 years	Non-Hispanic Native Hawaiian or Other Pacific Islander	0	0	0	0	0	0
2020-12-30	2020-02-01	2020-12-26	Arizona	5-14 years	Non-Hispanic Native Hawaiian or Other Pacific Islander	0	0	0	0	0	0
2020-12-30	2020-02-01	2020-12-26	Arizona	15-24 years	Non-Hispanic Native Hawaiian or Other Pacific Islander	0		0	0	0	0	One or more data cells have counts between 1-9 and have been suppressed in accordance with NCHS confidentiality standards.
2020-12-30	2020-02-01	2020-12-26	Arizona	18-29 years	Non-Hispanic Native Hawaiian or Other Pacific Islander	0		0	0	0	0	One or more data cells have counts between 1-9 and have been suppressed in accordance with NCHS confidentiality standards.
2020-12-30	2020-02-01	2020-12-26	Arizona	25-34 years	Non-Hispanic Native Hawaiian or Other Pacific Islander	0		0	0	0	0	One or more data cells have counts between 1-9 and have been suppressed in accordance with NCHS confidentiality standards.
2020-12-30	2020-02-01	2020-12-26	Arizona	30-49 years	Non-Hispanic Native Hawaiian or Other Pacific Islander		16			0		One or more data cells have counts between 1-9 and have been suppressed in accordance with NCHS confidentiality standards.
2020-12-30	2020-02-01	2020-12-26	Arizona	35-44 years	Non-Hispanic Native Hawaiian or Other Pacific Islander					0		One or more data cells have counts between 1-9 and have been suppressed in accordance with NCHS confidentiality standards.
2020-12-30	2020-02-01	2020-12-26	Arizona	45-54 years	Non-Hispanic Native Hawaiian or Other Pacific Islander					0		One or more data cells have counts between 1-9 and have been suppressed in accordance with NCHS confidentiality standards.
2020-12-30	2020-02-01	2020-12-26	Arizona	50-64 years	Non-Hispanic Native Hawaiian or Other Pacific Islander		26			0		One or more data cells have counts between 1-9 and have been suppressed in accordance with NCHS confidentiality standards.
2020-12-30	2020-02-01	2020-12-26	Arizona	55-64 years	Non-Hispanic Native Hawaiian or Other Pacific Islander		21			0		One or more data cells have counts between 1-9 and have been suppressed in accordance with NCHS confidentiality standards.
2020-12-30	2020-02-01	2020-12-26	Arizona	65-74 years	Non-Hispanic Native Hawaiian or Other Pacific Islander		19			0		One or more data cells have counts between 1-9 and have been suppressed in accordance with NCHS confidentiality standards.
2020-12-30	2020-02-01	2020-12-26	Arizona	75-84 years	Non-Hispanic Native Hawaiian or Other Pacific Islander		16			0		One or more data cells have counts between 1-9 and have been suppressed in accordance with NCHS confidentiality standards.
2020-12-30	2020-02-01	2020-12-26	Arizona	85 years and over	Non-Hispanic Native Hawaiian or Other Pacific Islander	0		0	0	0	0	One or more data cells have counts between 1-9 and have been suppressed in accordance with NCHS confidentiality standards.
2020-12-30	2020-02-01	2020-12-26	Arizona	Under 1 year	Non-Hispanic More than one race	0	16	0	0	0	0
2020-12-30	2020-02-01	2020-12-26	Arizona	0-17 years	Non-Hispanic More than one race	0	26	0	0	0	0
2020-12-30	2020-02-01	2020-12-26	Arizona	1-4 years	Non-Hispanic More than one race	0		0	0	0	0	One or more data cells have counts between 1-9 and have been suppressed in accordance with NCHS confidentiality standards.
2020-12-30	2020-02-01	2020-12-26	Arizona	5-14 years	Non-Hispanic More than one race	0		0	0	0	0	One or more data cells have counts between 1-9 and have been suppressed in accordance with NCHS confidentiality standards.
2020-12-30	2020-02-01	2020-12-26	Arizona	15-24 years	Non-Hispanic More than one race	0	24	0	0	0	0
2020-12-30	2020-02-01	2020-12-26	Arizona	18-29 years	Non-Hispanic More than one race		53			0		One or more data cells have counts between 1-9 and have been suppressed in accordance with NCHS confidentiality standards.
2020-12-30	2020-02-01	2020-12-26	Arizona	25-34 years	Non-Hispanic More than one race		68			0		One or more data cells have counts between 1-9 and have been suppressed in accordance with NCHS confidentiality standards.
2020-12-30	2020-02-01	2020-12-26	Arizona	30-49 years	Non-Hispanic More than one race		115			0		One or more data cells have counts between 1-9 and have been suppressed in accordance with NCHS confidentiality standards.
2020-12-30	2020-02-01	2020-12-26	Arizona	35-44 years	Non-Hispanic More than one race		64			0		One or more data cells have counts between 1-9 and have been suppressed in accordance with NCHS confidentiality standards.
2020-12-30	2020-02-01	2020-12-26	Arizona	45-54 years	Non-Hispanic More than one race		55			0		One or more data cells have counts between 1-9 and have been suppressed in accordance with NCHS confidentiality standards.
2020-12-30	2020-02-01	2020-12-26	Arizona	50-64 years	Non-Hispanic More than one race	15	129	19	11		24	One or more data cells have counts between 1-9 and have been suppressed in accordance with NCHS confidentiality standards.
2020-12-30	2020-02-01	2020-12-26	Arizona	55-64 years	Non-Hispanic More than one race		88	13			17	One or more data cells have counts between 1-9 and have been suppressed in accordance with NCHS confidentiality standards.
2020-12-30	2020-02-01	2020-12-26	Arizona	65-74 years	Non-Hispanic More than one race	17	102	17	11		24	One or more data cells have counts between 1-9 and have been suppressed in accordance with NCHS confidentiality standards.
2020-12-30	2020-02-01	2020-12-26	Arizona	75-84 years	Non-Hispanic More than one race	17	100	10		0	22	One or more data cells have counts between 1-9 and have been suppressed in accordance with NCHS confidentiality standards.
2020-12-30	2020-02-01	2020-12-26	Arizona	85 years and over	Non-Hispanic More than one race		79	14		0	17	One or more data cells have counts between 1-9 and have been suppressed in accordance with NCHS confidentiality standards.
2020-12-30	2020-02-01	2020-12-26	Arizona	Under 1 year	Hispanic	0	156		0	0		One or more data cells have counts between 1-9 and have been suppressed in accordance with NCHS confidentiality standards.
2020-12-30	2020-02-01	2020-12-26	Arizona	0-17 years	Hispanic		317					One or more data cells have counts between 1-9 and have been suppressed in accordance with NCHS confidentiality standards.
2020-12-30	2020-02-01	2020-12-26	Arizona	1-4 years	Hispanic	0	37		0			One or more data cells have counts between 1-9 and have been suppressed in accordance with NCHS confidentiality standards.
2020-12-30	2020-02-01	2020-12-26	Arizona	5-14 years	Hispanic		49			0		One or more data cells have counts between 1-9 and have been suppressed in accordance with NCHS confidentiality standards.
2020-12-30	2020-02-01	2020-12-26	Arizona	15-24 years	Hispanic	15	456	12			21	One or more data cells have counts between 1-9 and have been suppressed in accordance with NCHS confidentiality standards.
2020-12-30	2020-02-01	2020-12-26	Arizona	18-29 years	Hispanic	31	699	26	15		43	One or more data cells have counts between 1-9 and have been suppressed in accordance with NCHS confidentiality standards.
2020-12-30	2020-02-01	2020-12-26	Arizona	25-34 years	Hispanic	42	627	35	23		55	One or more data cells have counts between 1-9 and have been suppressed in accordance with NCHS confidentiality standards.
2020-12-30	2020-02-01	2020-12-26	Arizona	30-49 years	Hispanic	240	1485	165	132		277	One or more data cells have counts between 1-9 and have been suppressed in accordance with NCHS confidentiality standards.
2020-12-30	2020-02-01	2020-12-26	Arizona	35-44 years	Hispanic	122	734	76	64		135	One or more data cells have counts between 1-9 and have been suppressed in accordance with NCHS confidentiality standards.
2020-12-30	2020-02-01	2020-12-26	Arizona	45-54 years	Hispanic	230	1039	178	140		272	One or more data cells have counts between 1-9 and have been suppressed in accordance with NCHS confidentiality standards.
2020-12-30	2020-02-01	2020-12-26	Arizona	50-64 years	Hispanic	579	2373	457	351	10	695
2020-12-30	2020-02-01	2020-12-26	Arizona	55-64 years	Hispanic	442	1776	348	264		534	One or more data cells have counts between 1-9 and have been suppressed in accordance with NCHS confidentiality standards.
2020-12-30	2020-02-01	2020-12-26	Arizona	65-74 years	Hispanic	593	2132	481	373		707	One or more data cells have counts between 1-9 and have been suppressed in accordance with NCHS confidentiality standards.
2020-12-30	2020-02-01	2020-12-26	Arizona	75-84 years	Hispanic	488	2215	438	317		611	One or more data cells have counts between 1-9 and have been suppressed in accordance with NCHS confidentiality standards.
2020-12-30	2020-02-01	2020-12-26	Arizona	85 years and over	Hispanic	337	2077	291	205		424	One or more data cells have counts between 1-9 and have been suppressed in accordance with NCHS confidentiality standards.
2020-12-30	2020-02-01	2020-12-26	Arizona	Under 1 year	Unknown	0		0	0	0	0	One or more data cells have counts between 1-9 and have been suppressed in accordance with NCHS confidentiality standards.
2020-12-30	2020-02-01	2020-12-26	Arizona	0-17 years	Unknown	0		0	0	0	0	One or more data cells have counts between 1-9 and have been suppressed in accordance with NCHS confidentiality standards.
2020-12-30	2020-02-01	2020-12-26	Arizona	1-4 years	Unknown	0	0	0	0	0	0
2020-12-30	2020-02-01	2020-12-26	Arizona	5-14 years	Unknown	0	0	0	0	0	0
2020-12-30	2020-02-01	2020-12-26	Arizona	15-24 years	Unknown	0		0	0	0	0	One or more data cells have counts between 1-9 and have been suppressed in accordance with NCHS confidentiality standards.
2020-12-30	2020-02-01	2020-12-26	Arizona	18-29 years	Unknown		12			0		One or more data cells have counts between 1-9 and have been suppressed in accordance with NCHS confidentiality standards.
2020-12-30	2020-02-01	2020-12-26	Arizona	25-34 years	Unknown		18			0		One or more data cells have counts between 1-9 and have been suppressed in accordance with NCHS confidentiality standards.
2020-12-30	2020-02-01	2020-12-26	Arizona	30-49 years	Unknown		78		0	0		One or more data cells have counts between 1-9 and have been suppressed in accordance with NCHS confidentiality standards.
2020-12-30	2020-02-01	2020-12-26	Arizona	35-44 years	Unknown		30		0	0		One or more data cells have counts between 1-9 and have been suppressed in accordance with NCHS confidentiality standards.
2020-12-30	2020-02-01	2020-12-26	Arizona	45-54 years	Unknown		102			0		One or more data cells have counts between 1-9 and have been suppressed in accordance with NCHS confidentiality standards.
2020-12-30	2020-02-01	2020-12-26	Arizona	50-64 years	Unknown	25	293	21	14	0	32
2020-12-30	2020-02-01	2020-12-26	Arizona	55-64 years	Unknown	21	229	18	12	0	27
2020-12-30	2020-02-01	2020-12-26	Arizona	65-74 years	Unknown	22	287	36	11	0	47
2020-12-30	2020-02-01	2020-12-26	Arizona	75-84 years	Unknown	27	163	26	17	0	36
2020-12-30	2020-02-01	2020-12-26	Arizona	85 years and over	Unknown	14	99	11		0	19	One or more data cells have counts between 1-9 and have been suppressed in accordance with NCHS confidentiality standards.
2020-12-30	2020-02-01	2020-12-26	Arkansas	Under 1 year	Non-Hispanic White	0	122		0	0		One or more data cells have counts between 1-9 and have been suppressed in accordance with NCHS confidentiality standards.
2020-12-30	2020-02-01	2020-12-26	Arkansas	0-17 years	Non-Hispanic White	0	221		0			One or more data cells have counts between 1-9 and have been suppressed in accordance with NCHS confidentiality standards.
2020-12-30	2020-02-01	2020-12-26	Arkansas	1-4 years	Non-Hispanic White	0	22		0			One or more data cells have counts between 1-9 and have been suppressed in accordance with NCHS confidentiality standards.
2020-12-30	2020-02-01	2020-12-26	Arkansas	5-14 years	Non-Hispanic White	0	40	0	0	0	0
2020-12-30	2020-02-01	2020-12-26	Arkansas	15-24 years	Non-Hispanic White		202		0			One or more data cells have counts between 1-9 and have been suppressed in accordance with NCHS confidentiality standards.
2020-12-30	2020-02-01	2020-12-26	Arkansas	18-29 years	Non-Hispanic White		339	10	0		14	One or more data cells have counts between 1-9 and have been suppressed in accordance with NCHS confidentiality standards.
2020-12-30	2020-02-01	2020-12-26	Arkansas	25-34 years	Non-Hispanic White		413	15		0	19	One or more data cells have counts between 1-9 and have been suppressed in accordance with NCHS confidentiality standards.
2020-12-30	2020-02-01	2020-12-26	Arkansas	30-49 years	Non-Hispanic White	55	1642	92	19		132	One or more data cells have counts between 1-9 and have been suppressed in accordance with NCHS confidentiality standards.
2020-12-30	2020-02-01	2020-12-26	Arkansas	35-44 years	Non-Hispanic White	18	775	45			61	One or more data cells have counts between 1-9 and have been suppressed in accordance with NCHS confidentiality standards.
2020-12-30	2020-02-01	2020-12-26	Arkansas	45-54 years	Non-Hispanic White	66	1457	97	27		142	One or more data cells have counts between 1-9 and have been suppressed in accordance with NCHS confidentiality standards.
2020-12-30	2020-02-01	2020-12-26	Arkansas	50-64 years	Non-Hispanic White	234	4513	348	108	19	493
2020-12-30	2020-02-01	2020-12-26	Arkansas	55-64 years	Non-Hispanic White	200	3684	288	93	14	409
2020-12-30	2020-02-01	2020-12-26	Arkansas	65-74 years	Non-Hispanic White	453	5885	551	216	19	806
2020-12-30	2020-02-01	2020-12-26	Arkansas	75-84 years	Non-Hispanic White	789	7277	795	357	12	1239
2020-12-30	2020-02-01	2020-12-26	Arkansas	85 years and over	Non-Hispanic White	912	7480	763	349	12	1336
2020-12-30	2020-02-01	2020-12-26	Arkansas	Under 1 year	Non-Hispanic Black	0	54		0	0		One or more data cells have counts between 1-9 and have been suppressed in accordance with NCHS confidentiality standards.
2020-12-30	2020-02-01	2020-12-26	Arkansas	0-17 years	Non-Hispanic Black	0	105		0			One or more data cells have counts between 1-9 and have been suppressed in accordance with NCHS confidentiality standards.
2020-12-30	2020-02-01	2020-12-26	Arkansas	1-4 years	Non-Hispanic Black	0	17	0	0			One or more data cells have counts between 1-9 and have been suppressed in accordance with NCHS confidentiality standards.
2020-12-30	2020-02-01	2020-12-26	Arkansas	5-14 years	Non-Hispanic Black	0	16	0	0	0	0
2020-12-30	2020-02-01	2020-12-26	Arkansas	15-24 years	Non-Hispanic Black	0	115		0	0		One or more data cells have counts between 1-9 and have been suppressed in accordance with NCHS confidentiality standards.
2020-12-30	2020-02-01	2020-12-26	Arkansas	18-29 years	Non-Hispanic Black		172			0		One or more data cells have counts between 1-9 and have been suppressed in accordance with NCHS confidentiality standards.
2020-12-30	2020-02-01	2020-12-26	Arkansas	25-34 years	Non-Hispanic Black		186				15	One or more data cells have counts between 1-9 and have been suppressed in accordance with NCHS confidentiality standards.
2020-12-30	2020-02-01	2020-12-26	Arkansas	30-49 years	Non-Hispanic Black	36	542	25	13		49	One or more data cells have counts between 1-9 and have been suppressed in accordance with NCHS confidentiality standards.
2020-12-30	2020-02-01	2020-12-26	Arkansas	35-44 years	Non-Hispanic Black	17	261	11		0	24	One or more data cells have counts between 1-9 and have been suppressed in accordance with NCHS confidentiality standards.
2020-12-30	2020-02-01	2020-12-26	Arkansas	45-54 years	Non-Hispanic Black	29	375	30	16		43	One or more data cells have counts between 1-9 and have been suppressed in accordance with NCHS confidentiality standards.
2020-12-30	2020-02-01	2020-12-26	Arkansas	50-64 years	Non-Hispanic Black	100	1040	91	43		151	One or more data cells have counts between 1-9 and have been suppressed in accordance with NCHS confidentiality standards.
2020-12-30	2020-02-01	2020-12-26	Arkansas	55-64 years	Non-Hispanic Black	85	835	71	35		124	One or more data cells have counts between 1-9 and have been suppressed in accordance with NCHS confidentiality standards.
2020-12-30	2020-02-01	2020-12-26	Arkansas	65-74 years	Non-Hispanic Black	118	1021	107	51		176	One or more data cells have counts between 1-9 and have been suppressed in accordance with NCHS confidentiality standards.
2020-12-30	2020-02-01	2020-12-26	Arkansas	75-84 years	Non-Hispanic Black	107	787	83	40	0	150
2020-12-30	2020-02-01	2020-12-26	Arkansas	85 years and over	Non-Hispanic Black	84	678	61	28	0	117
2020-12-30	2020-02-01	2020-12-26	Arkansas	Under 1 year	Non-Hispanic American Indian or Alaska Native	0		0	0	0	0	One or more data cells have counts between 1-9 and have been suppressed in accordance with NCHS confidentiality standards.
2020-12-30	2020-02-01	2020-12-26	Arkansas	0-17 years	Non-Hispanic American Indian or Alaska Native	0		0	0	0	0	One or more data cells have counts between 1-9 and have been suppressed in accordance with NCHS confidentiality standards.
2020-12-30	2020-02-01	2020-12-26	Arkansas	1-4 years	Non-Hispanic American Indian or Alaska Native	0	0	0	0	0	0
2020-12-30	2020-02-01	2020-12-26	Arkansas	5-14 years	Non-Hispanic American Indian or Alaska Native	0	0	0	0	0	0
2020-12-30	2020-02-01	2020-12-26	Arkansas	15-24 years	Non-Hispanic American Indian or Alaska Native	0	0	0	0	0	0
2020-12-30	2020-02-01	2020-12-26	Arkansas	18-29 years	Non-Hispanic American Indian or Alaska Native	0		0	0	0	0	One or more data cells have counts between 1-9 and have been suppressed in accordance with NCHS confidentiality standards.
2020-12-30	2020-02-01	2020-12-26	Arkansas	25-34 years	Non-Hispanic American Indian or Alaska Native	0			0	0		One or more data cells have counts between 1-9 and have been suppressed in accordance with NCHS confidentiality standards.
2020-12-30	2020-02-01	2020-12-26	Arkansas	30-49 years	Non-Hispanic American Indian or Alaska Native	0			0	0		One or more data cells have counts between 1-9 and have been suppressed in accordance with NCHS confidentiality standards.
2020-12-30	2020-02-01	2020-12-26	Arkansas	35-44 years	Non-Hispanic American Indian or Alaska Native	0		0	0	0	0	One or more data cells have counts between 1-9 and have been suppressed in accordance with NCHS confidentiality standards.
2020-12-30	2020-02-01	2020-12-26	Arkansas	45-54 years	Non-Hispanic American Indian or Alaska Native	0	15		0	0		One or more data cells have counts between 1-9 and have been suppressed in accordance with NCHS confidentiality standards.
2020-12-30	2020-02-01	2020-12-26	Arkansas	50-64 years	Non-Hispanic American Indian or Alaska Native		50			0	12	One or more data cells have counts between 1-9 and have been suppressed in accordance with NCHS confidentiality standards.
2020-12-30	2020-02-01	2020-12-26	Arkansas	55-64 years	Non-Hispanic American Indian or Alaska Native		37			0	10	One or more data cells have counts between 1-9 and have been suppressed in accordance with NCHS confidentiality standards.
2020-12-30	2020-02-01	2020-12-26	Arkansas	65-74 years	Non-Hispanic American Indian or Alaska Native		27			0	11	One or more data cells have counts between 1-9 and have been suppressed in accordance with NCHS confidentiality standards.
2020-12-30	2020-02-01	2020-12-26	Arkansas	75-84 years	Non-Hispanic American Indian or Alaska Native		27			0		One or more data cells have counts between 1-9 and have been suppressed in accordance with NCHS confidentiality standards.
2020-12-30	2020-02-01	2020-12-26	Arkansas	85 years and over	Non-Hispanic American Indian or Alaska Native		12			0		One or more data cells have counts between 1-9 and have been suppressed in accordance with NCHS confidentiality standards.
2020-12-30	2020-02-01	2020-12-26	Arkansas	Under 1 year	Non-Hispanic Asian	0		0	0	0	0	One or more data cells have counts between 1-9 and have been suppressed in accordance with NCHS confidentiality standards.
2020-12-30	2020-02-01	2020-12-26	Arkansas	0-17 years	Non-Hispanic Asian	0		0	0	0	0	One or more data cells have counts between 1-9 and have been suppressed in accordance with NCHS confidentiality standards.
2020-12-30	2020-02-01	2020-12-26	Arkansas	1-4 years	Non-Hispanic Asian	0		0	0	0	0	One or more data cells have counts between 1-9 and have been suppressed in accordance with NCHS confidentiality standards.
2020-12-30	2020-02-01	2020-12-26	Arkansas	5-14 years	Non-Hispanic Asian	0	0	0	0	0	0
2020-12-30	2020-02-01	2020-12-26	Arkansas	15-24 years	Non-Hispanic Asian	0		0	0	0	0	One or more data cells have counts between 1-9 and have been suppressed in accordance with NCHS confidentiality standards.
2020-12-30	2020-02-01	2020-12-26	Arkansas	18-29 years	Non-Hispanic Asian	0		0	0	0	0	One or more data cells have counts between 1-9 and have been suppressed in accordance with NCHS confidentiality standards.
2020-12-30	2020-02-01	2020-12-26	Arkansas	25-34 years	Non-Hispanic Asian	0		0	0	0	0	One or more data cells have counts between 1-9 and have been suppressed in accordance with NCHS confidentiality standards.
2020-12-30	2020-02-01	2020-12-26	Arkansas	30-49 years	Non-Hispanic Asian	0			0	0		One or more data cells have counts between 1-9 and have been suppressed in accordance with NCHS confidentiality standards.
2020-12-30	2020-02-01	2020-12-26	Arkansas	35-44 years	Non-Hispanic Asian	0			0	0		One or more data cells have counts between 1-9 and have been suppressed in accordance with NCHS confidentiality standards.
2020-12-30	2020-02-01	2020-12-26	Arkansas	45-54 years	Non-Hispanic Asian					0		One or more data cells have counts between 1-9 and have been suppressed in accordance with NCHS confidentiality standards.
2020-12-30	2020-02-01	2020-12-26	Arkansas	50-64 years	Non-Hispanic Asian		29			0		One or more data cells have counts between 1-9 and have been suppressed in accordance with NCHS confidentiality standards.
2020-12-30	2020-02-01	2020-12-26	Arkansas	55-64 years	Non-Hispanic Asian		23			0		One or more data cells have counts between 1-9 and have been suppressed in accordance with NCHS confidentiality standards.
2020-12-30	2020-02-01	2020-12-26	Arkansas	65-74 years	Non-Hispanic Asian		37			0	11	One or more data cells have counts between 1-9 and have been suppressed in accordance with NCHS confidentiality standards.
2020-12-30	2020-02-01	2020-12-26	Arkansas	75-84 years	Non-Hispanic Asian		37					One or more data cells have counts between 1-9 and have been suppressed in accordance with NCHS confidentiality standards.
2020-12-30	2020-02-01	2020-12-26	Arkansas	85 years and over	Non-Hispanic Asian		35			0		One or more data cells have counts between 1-9 and have been suppressed in accordance with NCHS confidentiality standards.
2020-12-30	2020-02-01	2020-12-26	Arkansas	Under 1 year	Non-Hispanic Native Hawaiian or Other Pacific Islander	0		0	0	0	0	One or more data cells have counts between 1-9 and have been suppressed in accordance with NCHS confidentiality standards.
2020-12-30	2020-02-01	2020-12-26	Arkansas	0-17 years	Non-Hispanic Native Hawaiian or Other Pacific Islander	0		0	0	0	0	One or more data cells have counts between 1-9 and have been suppressed in accordance with NCHS confidentiality standards.
2020-12-30	2020-02-01	2020-12-26	Arkansas	1-4 years	Non-Hispanic Native Hawaiian or Other Pacific Islander	0		0	0	0	0	One or more data cells have counts between 1-9 and have been suppressed in accordance with NCHS confidentiality standards.
2020-12-30	2020-02-01	2020-12-26	Arkansas	5-14 years	Non-Hispanic Native Hawaiian or Other Pacific Islander	0	0	0	0	0	0
2020-12-30	2020-02-01	2020-12-26	Arkansas	15-24 years	Non-Hispanic Native Hawaiian or Other Pacific Islander					0		One or more data cells have counts between 1-9 and have been suppressed in accordance with NCHS confidentiality standards.
2020-12-30	2020-02-01	2020-12-26	Arkansas	18-29 years	Non-Hispanic Native Hawaiian or Other Pacific Islander					0		One or more data cells have counts between 1-9 and have been suppressed in accordance with NCHS confidentiality standards.
2020-12-30	2020-02-01	2020-12-26	Arkansas	25-34 years	Non-Hispanic Native Hawaiian or Other Pacific Islander					0		One or more data cells have counts between 1-9 and have been suppressed in accordance with NCHS confidentiality standards.
2020-12-30	2020-02-01	2020-12-26	Arkansas	30-49 years	Non-Hispanic Native Hawaiian or Other Pacific Islander	19	33	10			21	One or more data cells have counts between 1-9 and have been suppressed in accordance with NCHS confidentiality standards.
2020-12-30	2020-02-01	2020-12-26	Arkansas	35-44 years	Non-Hispanic Native Hawaiian or Other Pacific Islander							One or more data cells have counts between 1-9 and have been suppressed in accordance with NCHS confidentiality standards.
2020-12-30	2020-02-01	2020-12-26	Arkansas	45-54 years	Non-Hispanic Native Hawaiian or Other Pacific Islander	13	21			0	14	One or more data cells have counts between 1-9 and have been suppressed in accordance with NCHS confidentiality standards.
2020-12-30	2020-02-01	2020-12-26	Arkansas	50-64 years	Non-Hispanic Native Hawaiian or Other Pacific Islander	17	24	15	12	0	20
2020-12-30	2020-02-01	2020-12-26	Arkansas	55-64 years	Non-Hispanic Native Hawaiian or Other Pacific Islander	13	20	13	10	0	16
2020-12-30	2020-02-01	2020-12-26	Arkansas	65-74 years	Non-Hispanic Native Hawaiian or Other Pacific Islander	14	22	10		0	15	One or more data cells have counts between 1-9 and have been suppressed in accordance with NCHS confidentiality standards.
2020-12-30	2020-02-01	2020-12-26	Arkansas	75-84 years	Non-Hispanic Native Hawaiian or Other Pacific Islander					0		One or more data cells have counts between 1-9 and have been suppressed in accordance with NCHS confidentiality standards.
2020-12-30	2020-02-01	2020-12-26	Arkansas	85 years and over	Non-Hispanic Native Hawaiian or Other Pacific Islander	0		0	0			One or more data cells have counts between 1-9 and have been suppressed in accordance with NCHS confidentiality standards.
2020-12-30	2020-02-01	2020-12-26	Arkansas	Under 1 year	Non-Hispanic More than one race	0		0	0	0	0	One or more data cells have counts between 1-9 and have been suppressed in accordance with NCHS confidentiality standards.
2020-12-30	2020-02-01	2020-12-26	Arkansas	0-17 years	Non-Hispanic More than one race	0	11	0	0	0	0
2020-12-30	2020-02-01	2020-12-26	Arkansas	1-4 years	Non-Hispanic More than one race	0	0	0	0	0	0
2020-12-30	2020-02-01	2020-12-26	Arkansas	5-14 years	Non-Hispanic More than one race	0		0	0	0	0	One or more data cells have counts between 1-9 and have been suppressed in accordance with NCHS confidentiality standards.
2020-12-30	2020-02-01	2020-12-26	Arkansas	15-24 years	Non-Hispanic More than one race	0		0	0	0	0	One or more data cells have counts between 1-9 and have been suppressed in accordance with NCHS confidentiality standards.
2020-12-30	2020-02-01	2020-12-26	Arkansas	18-29 years	Non-Hispanic More than one race	0		0	0	0	0	One or more data cells have counts between 1-9 and have been suppressed in accordance with NCHS confidentiality standards.
2020-12-30	2020-02-01	2020-12-26	Arkansas	25-34 years	Non-Hispanic More than one race	0		0	0	0	0	One or more data cells have counts between 1-9 and have been suppressed in accordance with NCHS confidentiality standards.
2020-12-30	2020-02-01	2020-12-26	Arkansas	30-49 years	Non-Hispanic More than one race		11	0	0	0		One or more data cells have counts between 1-9 and have been suppressed in accordance with NCHS confidentiality standards.
2020-12-30	2020-02-01	2020-12-26	Arkansas	35-44 years	Non-Hispanic More than one race	0		0	0	0	0	One or more data cells have counts between 1-9 and have been suppressed in accordance with NCHS confidentiality standards.
2020-12-30	2020-02-01	2020-12-26	Arkansas	45-54 years	Non-Hispanic More than one race					0		One or more data cells have counts between 1-9 and have been suppressed in accordance with NCHS confidentiality standards.
2020-12-30	2020-02-01	2020-12-26	Arkansas	50-64 years	Non-Hispanic More than one race		20			0		One or more data cells have counts between 1-9 and have been suppressed in accordance with NCHS confidentiality standards.
2020-12-30	2020-02-01	2020-12-26	Arkansas	55-64 years	Non-Hispanic More than one race		15			0		One or more data cells have counts between 1-9 and have been suppressed in accordance with NCHS confidentiality standards.
2020-12-30	2020-02-01	2020-12-26	Arkansas	65-74 years	Non-Hispanic More than one race		22					One or more data cells have counts between 1-9 and have been suppressed in accordance with NCHS confidentiality standards.
2020-12-30	2020-02-01	2020-12-26	Arkansas	75-84 years	Non-Hispanic More than one race		20			0		One or more data cells have counts between 1-9 and have been suppressed in accordance with NCHS confidentiality standards.
2020-12-30	2020-02-01	2020-12-26	Arkansas	85 years and over	Non-Hispanic More than one race		18			0		One or more data cells have counts between 1-9 and have been suppressed in accordance with NCHS confidentiality standards.
2020-12-30	2020-02-01	2020-12-26	Arkansas	Under 1 year	Hispanic	0	15	0	0	0	0
2020-12-30	2020-02-01	2020-12-26	Arkansas	0-17 years	Hispanic	0	23	0	0	0	0
2020-12-30	2020-02-01	2020-12-26	Arkansas	1-4 years	Hispanic	0		0	0	0	0	One or more data cells have counts between 1-9 and have been suppressed in accordance with NCHS confidentiality standards.
2020-12-30	2020-02-01	2020-12-26	Arkansas	5-14 years	Hispanic	0		0	0	0	0	One or more data cells have counts between 1-9 and have been suppressed in accordance with NCHS confidentiality standards.
2020-12-30	2020-02-01	2020-12-26	Arkansas	15-24 years	Hispanic	0	29	0	0	0	0
2020-12-30	2020-02-01	2020-12-26	Arkansas	18-29 years	Hispanic		42			0		One or more data cells have counts between 1-9 and have been suppressed in accordance with NCHS confidentiality standards.
2020-12-30	2020-02-01	2020-12-26	Arkansas	25-34 years	Hispanic		32			0		One or more data cells have counts between 1-9 and have been suppressed in accordance with NCHS confidentiality standards.
2020-12-30	2020-02-01	2020-12-26	Arkansas	30-49 years	Hispanic	13	83			0	17	One or more data cells have counts between 1-9 and have been suppressed in accordance with NCHS confidentiality standards.
2020-12-30	2020-02-01	2020-12-26	Arkansas	35-44 years	Hispanic		37			0		One or more data cells have counts between 1-9 and have been suppressed in accordance with NCHS confidentiality standards.
2020-12-30	2020-02-01	2020-12-26	Arkansas	45-54 years	Hispanic	17	68	13	10	0	20
2020-12-30	2020-02-01	2020-12-26	Arkansas	50-64 years	Hispanic	58	137	42	36		65	One or more data cells have counts between 1-9 and have been suppressed in accordance with NCHS confidentiality standards.
2020-12-30	2020-02-01	2020-12-26	Arkansas	55-64 years	Hispanic	48	102	31	27		53	One or more data cells have counts between 1-9 and have been suppressed in accordance with NCHS confidentiality standards.
2020-12-30	2020-02-01	2020-12-26	Arkansas	65-74 years	Hispanic	27	83	23	18	0	32
2020-12-30	2020-02-01	2020-12-26	Arkansas	75-84 years	Hispanic	23	91	21	14		31	One or more data cells have counts between 1-9 and have been suppressed in accordance with NCHS confidentiality standards.
2020-12-30	2020-02-01	2020-12-26	Arkansas	85 years and over	Hispanic	12	53	10		0	14	One or more data cells have counts between 1-9 and have been suppressed in accordance with NCHS confidentiality standards.
2020-12-30	2020-02-01	2020-12-26	Arkansas	Under 1 year	Unknown	0		0	0	0	0	One or more data cells have counts between 1-9 and have been suppressed in accordance with NCHS confidentiality standards.
2020-12-30	2020-02-01	2020-12-26	Arkansas	0-17 years	Unknown	0		0	0	0	0	One or more data cells have counts between 1-9 and have been suppressed in accordance with NCHS confidentiality standards.
2020-12-30	2020-02-01	2020-12-26	Arkansas	1-4 years	Unknown	0	0	0	0	0	0
2020-12-30	2020-02-01	2020-12-26	Arkansas	5-14 years	Unknown	0	0	0	0	0	0
2020-12-30	2020-02-01	2020-12-26	Arkansas	15-24 years	Unknown	0	0	0	0	0	0
2020-12-30	2020-02-01	2020-12-26	Arkansas	18-29 years	Unknown	0	0	0	0	0	0
2020-12-30	2020-02-01	2020-12-26	Arkansas	25-34 years	Unknown	0	0	0	0	0	0
2020-12-30	2020-02-01	2020-12-26	Arkansas	30-49 years	Unknown	0		0	0	0	0	One or more data cells have counts between 1-9 and have been suppressed in accordance with NCHS confidentiality standards.
2020-12-30	2020-02-01	2020-12-26	Arkansas	35-44 years	Unknown	0		0	0	0	0	One or more data cells have counts between 1-9 and have been suppressed in accordance with NCHS confidentiality standards.
2020-12-30	2020-02-01	2020-12-26	Arkansas	45-54 years	Unknown	0			0	0		One or more data cells have counts between 1-9 and have been suppressed in accordance with NCHS confidentiality standards.
2020-12-30	2020-02-01	2020-12-26	Arkansas	50-64 years	Unknown	0			0	0		One or more data cells have counts between 1-9 and have been suppressed in accordance with NCHS confidentiality standards.
2020-12-30	2020-02-01	2020-12-26	Arkansas	55-64 years	Unknown	0		0	0	0	0	One or more data cells have counts between 1-9 and have been suppressed in accordance with NCHS confidentiality standards.
2020-12-30	2020-02-01	2020-12-26	Arkansas	65-74 years	Unknown	0		0	0	0	0	One or more data cells have counts between 1-9 and have been suppressed in accordance with NCHS confidentiality standards.
2020-12-30	2020-02-01	2020-12-26	Arkansas	75-84 years	Unknown	0	0	0	0	0	0
2020-12-30	2020-02-01	2020-12-26	Arkansas	85 years and over	Unknown	0		0	0	0	0	One or more data cells have counts between 1-9 and have been suppressed in accordance with NCHS confidentiality standards.
2020-12-30	2020-02-01	2020-12-26	California	Under 1 year	Non-Hispanic White	0	284		0			One or more data cells have counts between 1-9 and have been suppressed in accordance with NCHS confidentiality standards.
2020-12-30	2020-02-01	2020-12-26	California	0-17 years	Non-Hispanic White	0	588		0		12	One or more data cells have counts between 1-9 and have been suppressed in accordance with NCHS confidentiality standards.
2020-12-30	2020-02-01	2020-12-26	California	1-4 years	Non-Hispanic White	0	73		0			One or more data cells have counts between 1-9 and have been suppressed in accordance with NCHS confidentiality standards.
2020-12-30	2020-02-01	2020-12-26	California	5-14 years	Non-Hispanic White	0	100		0			One or more data cells have counts between 1-9 and have been suppressed in accordance with NCHS confidentiality standards.
2020-12-30	2020-02-01	2020-12-26	California	15-24 years	Non-Hispanic White	10	843	12		0	20	One or more data cells have counts between 1-9 and have been suppressed in accordance with NCHS confidentiality standards.
2020-12-30	2020-02-01	2020-12-26	California	18-29 years	Non-Hispanic White	17	1653	38			54	One or more data cells have counts between 1-9 and have been suppressed in accordance with NCHS confidentiality standards.
2020-12-30	2020-02-01	2020-12-26	California	25-34 years	Non-Hispanic White	21	2256	55	10		71	One or more data cells have counts between 1-9 and have been suppressed in accordance with NCHS confidentiality standards.
2020-12-30	2020-02-01	2020-12-26	California	30-49 years	Non-Hispanic White	105	6619	252	53	12	316
2020-12-30	2020-02-01	2020-12-26	California	35-44 years	Non-Hispanic White	44	3097	96	20		125	One or more data cells have counts between 1-9 and have been suppressed in accordance with NCHS confidentiality standards.
2020-12-30	2020-02-01	2020-12-26	California	45-54 years	Non-Hispanic White	163	6028	365	82	16	462
2020-12-30	2020-02-01	2020-12-26	California	50-64 years	Non-Hispanic White	677	20217	1421	366	62	1794
2020-12-30	2020-02-01	2020-12-26	California	55-64 years	Non-Hispanic White	561	16396	1183	309	51	1486
2020-12-30	2020-02-01	2020-12-26	California	65-74 years	Non-Hispanic White	1189	28023	2349	644	65	2959
2020-12-30	2020-02-01	2020-12-26	California	75-84 years	Non-Hispanic White	2032	37521	3392	1080	75	4419
2020-12-30	2020-02-01	2020-12-26	California	85 years and over	Non-Hispanic White	2845	56057	4176	1340	74	5755
2020-12-30	2020-02-01	2020-12-26	California	Under 1 year	Non-Hispanic Black	0	175		0	0		One or more data cells have counts between 1-9 and have been suppressed in accordance with NCHS confidentiality standards.
2020-12-30	2020-02-01	2020-12-26	California	0-17 years	Non-Hispanic Black		311		0			One or more data cells have counts between 1-9 and have been suppressed in accordance with NCHS confidentiality standards.
2020-12-30	2020-02-01	2020-12-26	California	1-4 years	Non-Hispanic Black		33	0	0	0		One or more data cells have counts between 1-9 and have been suppressed in accordance with NCHS confidentiality standards.
2020-12-30	2020-02-01	2020-12-26	California	5-14 years	Non-Hispanic Black	0	54		0			One or more data cells have counts between 1-9 and have been suppressed in accordance with NCHS confidentiality standards.
2020-12-30	2020-02-01	2020-12-26	California	15-24 years	Non-Hispanic Black		439			0	11	One or more data cells have counts between 1-9 and have been suppressed in accordance with NCHS confidentiality standards.
2020-12-30	2020-02-01	2020-12-26	California	18-29 years	Non-Hispanic Black	14	786	20		0	27	One or more data cells have counts between 1-9 and have been suppressed in accordance with NCHS confidentiality standards.
2020-12-30	2020-02-01	2020-12-26	California	25-34 years	Non-Hispanic Black	26	807	34	15		46	One or more data cells have counts between 1-9 and have been suppressed in accordance with NCHS confidentiality standards.
2020-12-30	2020-02-01	2020-12-26	California	30-49 years	Non-Hispanic Black	100	2199	131	44		193	One or more data cells have counts between 1-9 and have been suppressed in accordance with NCHS confidentiality standards.
2020-12-30	2020-02-01	2020-12-26	California	35-44 years	Non-Hispanic Black	40	1067	63	18		87	One or more data cells have counts between 1-9 and have been suppressed in accordance with NCHS confidentiality standards.
2020-12-30	2020-02-01	2020-12-26	California	45-54 years	Non-Hispanic Black	87	1813	134	39		189	One or more data cells have counts between 1-9 and have been suppressed in accordance with NCHS confidentiality standards.
2020-12-30	2020-02-01	2020-12-26	California	50-64 years	Non-Hispanic Black	290	5095	419	149	17	577
2020-12-30	2020-02-01	2020-12-26	California	55-64 years	Non-Hispanic Black	245	4003	332	126	13	464
2020-12-30	2020-02-01	2020-12-26	California	65-74 years	Non-Hispanic Black	365	4763	535	214	11	697
2020-12-30	2020-02-01	2020-12-26	California	75-84 years	Non-Hispanic Black	377	4406	519	224		679	One or more data cells have counts between 1-9 and have been suppressed in accordance with NCHS confidentiality standards.
2020-12-30	2020-02-01	2020-12-26	California	85 years and over	Non-Hispanic Black	329	4137	447	159		621	One or more data cells have counts between 1-9 and have been suppressed in accordance with NCHS confidentiality standards.
2020-12-30	2020-02-01	2020-12-26	California	Under 1 year	Non-Hispanic American Indian or Alaska Native	0		0	0	0	0	One or more data cells have counts between 1-9 and have been suppressed in accordance with NCHS confidentiality standards.
2020-12-30	2020-02-01	2020-12-26	California	0-17 years	Non-Hispanic American Indian or Alaska Native	0		0	0	0	0	One or more data cells have counts between 1-9 and have been suppressed in accordance with NCHS confidentiality standards.
2020-12-30	2020-02-01	2020-12-26	California	1-4 years	Non-Hispanic American Indian or Alaska Native	0	0	0	0	0	0
2020-12-30	2020-02-01	2020-12-26	California	5-14 years	Non-Hispanic American Indian or Alaska Native	0		0	0	0	0	One or more data cells have counts between 1-9 and have been suppressed in accordance with NCHS confidentiality standards.
2020-12-30	2020-02-01	2020-12-26	California	15-24 years	Non-Hispanic American Indian or Alaska Native	0	27	0	0	0	0
2020-12-30	2020-02-01	2020-12-26	California	18-29 years	Non-Hispanic American Indian or Alaska Native	0	43	0	0	0	0
2020-12-30	2020-02-01	2020-12-26	California	25-34 years	Non-Hispanic American Indian or Alaska Native		43			0		One or more data cells have counts between 1-9 and have been suppressed in accordance with NCHS confidentiality standards.
2020-12-30	2020-02-01	2020-12-26	California	30-49 years	Non-Hispanic American Indian or Alaska Native		165	11		0	12	One or more data cells have counts between 1-9 and have been suppressed in accordance with NCHS confidentiality standards.
2020-12-30	2020-02-01	2020-12-26	California	35-44 years	Non-Hispanic American Indian or Alaska Native		86			0		One or more data cells have counts between 1-9 and have been suppressed in accordance with NCHS confidentiality standards.
2020-12-30	2020-02-01	2020-12-26	California	45-54 years	Non-Hispanic American Indian or Alaska Native		135	12		0	14	One or more data cells have counts between 1-9 and have been suppressed in accordance with NCHS confidentiality standards.
2020-12-30	2020-02-01	2020-12-26	California	50-64 years	Non-Hispanic American Indian or Alaska Native	16	333	34	12		39	One or more data cells have counts between 1-9 and have been suppressed in accordance with NCHS confidentiality standards.
2020-12-30	2020-02-01	2020-12-26	California	55-64 years	Non-Hispanic American Indian or Alaska Native	10	251	25			28	One or more data cells have counts between 1-9 and have been suppressed in accordance with NCHS confidentiality standards.
2020-12-30	2020-02-01	2020-12-26	California	65-74 years	Non-Hispanic American Indian or Alaska Native	29	286	34	18		46	One or more data cells have counts between 1-9 and have been suppressed in accordance with NCHS confidentiality standards.
2020-12-30	2020-02-01	2020-12-26	California	75-84 years	Non-Hispanic American Indian or Alaska Native	21	305	26	14		34	One or more data cells have counts between 1-9 and have been suppressed in accordance with NCHS confidentiality standards.
2020-12-30	2020-02-01	2020-12-26	California	85 years and over	Non-Hispanic American Indian or Alaska Native	18	226	24	11		32	One or more data cells have counts between 1-9 and have been suppressed in accordance with NCHS confidentiality standards.
2020-12-30	2020-02-01	2020-12-26	California	Under 1 year	Non-Hispanic Asian		101			0		One or more data cells have counts between 1-9 and have been suppressed in accordance with NCHS confidentiality standards.
2020-12-30	2020-02-01	2020-12-26	California	0-17 years	Non-Hispanic Asian		192	11			13	One or more data cells have counts between 1-9 and have been suppressed in accordance with NCHS confidentiality standards.
2020-12-30	2020-02-01	2020-12-26	California	1-4 years	Non-Hispanic Asian	0	20		0			One or more data cells have counts between 1-9 and have been suppressed in accordance with NCHS confidentiality standards.
2020-12-30	2020-02-01	2020-12-26	California	5-14 years	Non-Hispanic Asian	0	38		0	0		One or more data cells have counts between 1-9 and have been suppressed in accordance with NCHS confidentiality standards.
2020-12-30	2020-02-01	2020-12-26	California	15-24 years	Non-Hispanic Asian		176			0		One or more data cells have counts between 1-9 and have been suppressed in accordance with NCHS confidentiality standards.
2020-12-30	2020-02-01	2020-12-26	California	18-29 years	Non-Hispanic Asian		320				14	One or more data cells have counts between 1-9 and have been suppressed in accordance with NCHS confidentiality standards.
2020-12-30	2020-02-01	2020-12-26	California	25-34 years	Non-Hispanic Asian	11	389	10			20	One or more data cells have counts between 1-9 and have been suppressed in accordance with NCHS confidentiality standards.
2020-12-30	2020-02-01	2020-12-26	California	30-49 years	Non-Hispanic Asian	93	1517	103	48		152	One or more data cells have counts between 1-9 and have been suppressed in accordance with NCHS confidentiality standards.
2020-12-30	2020-02-01	2020-12-26	California	35-44 years	Non-Hispanic Asian	43	704	47	22	0	68
2020-12-30	2020-02-01	2020-12-26	California	45-54 years	Non-Hispanic Asian	95	1452	110	52		158	One or more data cells have counts between 1-9 and have been suppressed in accordance with NCHS confidentiality standards.
2020-12-30	2020-02-01	2020-12-26	California	50-64 years	Non-Hispanic Asian	302	3783	372	176	18	516
2020-12-30	2020-02-01	2020-12-26	California	55-64 years	Non-Hispanic Asian	249	2932	311	146	16	430
2020-12-30	2020-02-01	2020-12-26	California	65-74 years	Non-Hispanic Asian	457	4900	656	284	10	838
2020-12-30	2020-02-01	2020-12-26	California	75-84 years	Non-Hispanic Asian	612	6993	939	350	18	1219
2020-12-30	2020-02-01	2020-12-26	California	85 years and over	Non-Hispanic Asian	1050	11366	1545	551		2053	One or more data cells have counts between 1-9 and have been suppressed in accordance with NCHS confidentiality standards.
2020-12-30	2020-02-01	2020-12-26	California	Under 1 year	Non-Hispanic Native Hawaiian or Other Pacific Islander	0		0	0	0	0	One or more data cells have counts between 1-9 and have been suppressed in accordance with NCHS confidentiality standards.
2020-12-30	2020-02-01	2020-12-26	California	0-17 years	Non-Hispanic Native Hawaiian or Other Pacific Islander	0	14		0	0		One or more data cells have counts between 1-9 and have been suppressed in accordance with NCHS confidentiality standards.
2020-12-30	2020-02-01	2020-12-26	California	1-4 years	Non-Hispanic Native Hawaiian or Other Pacific Islander	0		0	0	0	0	One or more data cells have counts between 1-9 and have been suppressed in accordance with NCHS confidentiality standards.
2020-12-30	2020-02-01	2020-12-26	California	5-14 years	Non-Hispanic Native Hawaiian or Other Pacific Islander	0			0	0		One or more data cells have counts between 1-9 and have been suppressed in accordance with NCHS confidentiality standards.
2020-12-30	2020-02-01	2020-12-26	California	15-24 years	Non-Hispanic Native Hawaiian or Other Pacific Islander		13			0		One or more data cells have counts between 1-9 and have been suppressed in accordance with NCHS confidentiality standards.
2020-12-30	2020-02-01	2020-12-26	California	18-29 years	Non-Hispanic Native Hawaiian or Other Pacific Islander		31			0		One or more data cells have counts between 1-9 and have been suppressed in accordance with NCHS confidentiality standards.
2020-12-30	2020-02-01	2020-12-26	California	25-34 years	Non-Hispanic Native Hawaiian or Other Pacific Islander		44					One or more data cells have counts between 1-9 and have been suppressed in accordance with NCHS confidentiality standards.
2020-12-30	2020-02-01	2020-12-26	California	30-49 years	Non-Hispanic Native Hawaiian or Other Pacific Islander	11	158	11			19	One or more data cells have counts between 1-9 and have been suppressed in accordance with NCHS confidentiality standards.
2020-12-30	2020-02-01	2020-12-26	California	35-44 years	Non-Hispanic Native Hawaiian or Other Pacific Islander		72					One or more data cells have counts between 1-9 and have been suppressed in accordance with NCHS confidentiality standards.
2020-12-30	2020-02-01	2020-12-26	California	45-54 years	Non-Hispanic Native Hawaiian or Other Pacific Islander	15	139	16	10	0	21
2020-12-30	2020-02-01	2020-12-26	California	50-64 years	Non-Hispanic Native Hawaiian or Other Pacific Islander	40	294	40	27	0	53
2020-12-30	2020-02-01	2020-12-26	California	55-64 years	Non-Hispanic Native Hawaiian or Other Pacific Islander	29	216	28	18	0	39
2020-12-30	2020-02-01	2020-12-26	California	65-74 years	Non-Hispanic Native Hawaiian or Other Pacific Islander	29	223	28	19	0	38
2020-12-30	2020-02-01	2020-12-26	California	75-84 years	Non-Hispanic Native Hawaiian or Other Pacific Islander	24	230	34	17	0	41
2020-12-30	2020-02-01	2020-12-26	California	85 years and over	Non-Hispanic Native Hawaiian or Other Pacific Islander		160	12			16	One or more data cells have counts between 1-9 and have been suppressed in accordance with NCHS confidentiality standards.
2020-12-30	2020-02-01	2020-12-26	California	Under 1 year	Non-Hispanic More than one race	0	72		0	0		One or more data cells have counts between 1-9 and have been suppressed in accordance with NCHS confidentiality standards.
2020-12-30	2020-02-01	2020-12-26	California	0-17 years	Non-Hispanic More than one race	0	126		0			One or more data cells have counts between 1-9 and have been suppressed in accordance with NCHS confidentiality standards.
2020-12-30	2020-02-01	2020-12-26	California	1-4 years	Non-Hispanic More than one race	0	17	0	0			One or more data cells have counts between 1-9 and have been suppressed in accordance with NCHS confidentiality standards.
2020-12-30	2020-02-01	2020-12-26	California	5-14 years	Non-Hispanic More than one race	0	23		0	0		One or more data cells have counts between 1-9 and have been suppressed in accordance with NCHS confidentiality standards.
2020-12-30	2020-02-01	2020-12-26	California	15-24 years	Non-Hispanic More than one race	0	129		0	0		One or more data cells have counts between 1-9 and have been suppressed in accordance with NCHS confidentiality standards.
2020-12-30	2020-02-01	2020-12-26	California	18-29 years	Non-Hispanic More than one race	0	203		0	0		One or more data cells have counts between 1-9 and have been suppressed in accordance with NCHS confidentiality standards.
2020-12-30	2020-02-01	2020-12-26	California	25-34 years	Non-Hispanic More than one race		186			0		One or more data cells have counts between 1-9 and have been suppressed in accordance with NCHS confidentiality standards.
2020-12-30	2020-02-01	2020-12-26	California	30-49 years	Non-Hispanic More than one race	12	401	24			32	One or more data cells have counts between 1-9 and have been suppressed in accordance with NCHS confidentiality standards.
2020-12-30	2020-02-01	2020-12-26	California	35-44 years	Non-Hispanic More than one race		193	10			12	One or more data cells have counts between 1-9 and have been suppressed in accordance with NCHS confidentiality standards.
2020-12-30	2020-02-01	2020-12-26	California	45-54 years	Non-Hispanic More than one race		249	15			22	One or more data cells have counts between 1-9 and have been suppressed in accordance with NCHS confidentiality standards.
2020-12-30	2020-02-01	2020-12-26	California	50-64 years	Non-Hispanic More than one race	20	591	41	14		51	One or more data cells have counts between 1-9 and have been suppressed in accordance with NCHS confidentiality standards.
2020-12-30	2020-02-01	2020-12-26	California	55-64 years	Non-Hispanic More than one race	16	452	36	11		43	One or more data cells have counts between 1-9 and have been suppressed in accordance with NCHS confidentiality standards.
2020-12-30	2020-02-01	2020-12-26	California	65-74 years	Non-Hispanic More than one race	29	482	43	16	0	56
2020-12-30	2020-02-01	2020-12-26	California	75-84 years	Non-Hispanic More than one race	30	476	51	16		66	One or more data cells have counts between 1-9 and have been suppressed in accordance with NCHS confidentiality standards.
2020-12-30	2020-02-01	2020-12-26	California	85 years and over	Non-Hispanic More than one race	31	449	37	11		58	One or more data cells have counts between 1-9 and have been suppressed in accordance with NCHS confidentiality standards.
2020-12-30	2020-02-01	2020-12-26	California	Under 1 year	Hispanic		781		0	0		One or more data cells have counts between 1-9 and have been suppressed in accordance with NCHS confidentiality standards.
2020-12-30	2020-02-01	2020-12-26	California	0-17 years	Hispanic		1375	24	0		32	One or more data cells have counts between 1-9 and have been suppressed in accordance with NCHS confidentiality standards.
2020-12-30	2020-02-01	2020-12-26	California	1-4 years	Hispanic	0	126		0			One or more data cells have counts between 1-9 and have been suppressed in accordance with NCHS confidentiality standards.
2020-12-30	2020-02-01	2020-12-26	California	5-14 years	Hispanic		243	11	0		13	One or more data cells have counts between 1-9 and have been suppressed in accordance with NCHS confidentiality standards.
2020-12-30	2020-02-01	2020-12-26	California	15-24 years	Hispanic	40	1744	45	14		75	One or more data cells have counts between 1-9 and have been suppressed in accordance with NCHS confidentiality standards.
2020-12-30	2020-02-01	2020-12-26	California	18-29 years	Hispanic	100	2866	97	40		164	One or more data cells have counts between 1-9 and have been suppressed in accordance with NCHS confidentiality standards.
2020-12-30	2020-02-01	2020-12-26	California	25-34 years	Hispanic	173	2774	152	75	10	260
2020-12-30	2020-02-01	2020-12-26	California	30-49 years	Hispanic	1024	7582	877	561	24	1364
2020-12-30	2020-02-01	2020-12-26	California	35-44 years	Hispanic	459	3612	412	252	12	631
2020-12-30	2020-02-01	2020-12-26	California	45-54 years	Hispanic	1144	6059	938	669	25	1438
2020-12-30	2020-02-01	2020-12-26	California	50-64 years	Hispanic	2812	13649	2386	1688	52	3562
2020-12-30	2020-02-01	2020-12-26	California	55-64 years	Hispanic	2122	10133	1817	1279	34	2694
2020-12-30	2020-02-01	2020-12-26	California	65-74 years	Hispanic	2585	11942	2266	1581	27	3295
2020-12-30	2020-02-01	2020-12-26	California	75-84 years	Hispanic	2120	12169	2104	1323	26	2927
2020-12-30	2020-02-01	2020-12-26	California	85 years and over	Hispanic	1773	14292	1965	1022	25	2741
2020-12-30	2020-02-01	2020-12-26	California	Under 1 year	Unknown	0		0	0	0	0	One or more data cells have counts between 1-9 and have been suppressed in accordance with NCHS confidentiality standards.
2020-12-30	2020-02-01	2020-12-26	California	0-17 years	Unknown	0	10	0	0	0	0
2020-12-30	2020-02-01	2020-12-26	California	1-4 years	Unknown	0		0	0	0	0	One or more data cells have counts between 1-9 and have been suppressed in accordance with NCHS confidentiality standards.
2020-12-30	2020-02-01	2020-12-26	California	5-14 years	Unknown	0	0	0	0	0	0
2020-12-30	2020-02-01	2020-12-26	California	15-24 years	Unknown	0	0	0	0	0	0
2020-12-30	2020-02-01	2020-12-26	California	18-29 years	Unknown	0		0	0	0	0	One or more data cells have counts between 1-9 and have been suppressed in accordance with NCHS confidentiality standards.
2020-12-30	2020-02-01	2020-12-26	California	25-34 years	Unknown	0	18		0	0		One or more data cells have counts between 1-9 and have been suppressed in accordance with NCHS confidentiality standards.
2020-12-30	2020-02-01	2020-12-26	California	30-49 years	Unknown	0	65		0	0		One or more data cells have counts between 1-9 and have been suppressed in accordance with NCHS confidentiality standards.
2020-12-30	2020-02-01	2020-12-26	California	35-44 years	Unknown	0	31	0	0	0	0
2020-12-30	2020-02-01	2020-12-26	California	45-54 years	Unknown	0	78		0	0		One or more data cells have counts between 1-9 and have been suppressed in accordance with NCHS confidentiality standards.
2020-12-30	2020-02-01	2020-12-26	California	50-64 years	Unknown	11	245	14		0	18	One or more data cells have counts between 1-9 and have been suppressed in accordance with NCHS confidentiality standards.
2020-12-30	2020-02-01	2020-12-26	California	55-64 years	Unknown	11	192	13		0	17	One or more data cells have counts between 1-9 and have been suppressed in accordance with NCHS confidentiality standards.
2020-12-30	2020-02-01	2020-12-26	California	65-74 years	Unknown	12	202	15		0	21	One or more data cells have counts between 1-9 and have been suppressed in accordance with NCHS confidentiality standards.
2020-12-30	2020-02-01	2020-12-26	California	75-84 years	Unknown	12	108	17		0	21	One or more data cells have counts between 1-9 and have been suppressed in accordance with NCHS confidentiality standards.
2020-12-30	2020-02-01	2020-12-26	California	85 years and over	Unknown		75	12		0	17	One or more data cells have counts between 1-9 and have been suppressed in accordance with NCHS confidentiality standards.
2020-12-30	2020-02-01	2020-12-26	Colorado	Under 1 year	Non-Hispanic White	0	128	0	0	0	0
2020-12-30	2020-02-01	2020-12-26	Colorado	0-17 years	Non-Hispanic White		241		0			One or more data cells have counts between 1-9 and have been suppressed in accordance with NCHS confidentiality standards.
2020-12-30	2020-02-01	2020-12-26	Colorado	1-4 years	Non-Hispanic White	0	13	0	0	0	0
2020-12-30	2020-02-01	2020-12-26	Colorado	5-14 years	Non-Hispanic White		43		0			One or more data cells have counts between 1-9 and have been suppressed in accordance with NCHS confidentiality standards.
2020-12-30	2020-02-01	2020-12-26	Colorado	15-24 years	Non-Hispanic White		318					One or more data cells have counts between 1-9 and have been suppressed in accordance with NCHS confidentiality standards.
2020-12-30	2020-02-01	2020-12-26	Colorado	18-29 years	Non-Hispanic White		575	11			14	One or more data cells have counts between 1-9 and have been suppressed in accordance with NCHS confidentiality standards.
2020-12-30	2020-02-01	2020-12-26	Colorado	25-34 years	Non-Hispanic White		708	23		0	26	One or more data cells have counts between 1-9 and have been suppressed in accordance with NCHS confidentiality standards.
2020-12-30	2020-02-01	2020-12-26	Colorado	30-49 years	Non-Hispanic White	34	2016	83	14		109	One or more data cells have counts between 1-9 and have been suppressed in accordance with NCHS confidentiality standards.
2020-12-30	2020-02-01	2020-12-26	Colorado	35-44 years	Non-Hispanic White	11	981	39			49	One or more data cells have counts between 1-9 and have been suppressed in accordance with NCHS confidentiality standards.
2020-12-30	2020-02-01	2020-12-26	Colorado	45-54 years	Non-Hispanic White	53	1615	81	24		115	One or more data cells have counts between 1-9 and have been suppressed in accordance with NCHS confidentiality standards.
2020-12-30	2020-02-01	2020-12-26	Colorado	50-64 years	Non-Hispanic White	168	4674	294	78	21	405
2020-12-30	2020-02-01	2020-12-26	Colorado	55-64 years	Non-Hispanic White	135	3700	240	62	18	331
2020-12-30	2020-02-01	2020-12-26	Colorado	65-74 years	Non-Hispanic White	401	6180	527	216	16	726
2020-12-30	2020-02-01	2020-12-26	Colorado	75-84 years	Non-Hispanic White	761	7790	781	376		1173	One or more data cells have counts between 1-9 and have been suppressed in accordance with NCHS confidentiality standards.
2020-12-30	2020-02-01	2020-12-26	Colorado	85 years and over	Non-Hispanic White	1108	10605	899	471	21	1555
2020-12-30	2020-02-01	2020-12-26	Colorado	Under 1 year	Non-Hispanic Black	0	29		0	0		One or more data cells have counts between 1-9 and have been suppressed in accordance with NCHS confidentiality standards.
2020-12-30	2020-02-01	2020-12-26	Colorado	0-17 years	Non-Hispanic Black	0	55		0			One or more data cells have counts between 1-9 and have been suppressed in accordance with NCHS confidentiality standards.
2020-12-30	2020-02-01	2020-12-26	Colorado	1-4 years	Non-Hispanic Black	0		0	0			One or more data cells have counts between 1-9 and have been suppressed in accordance with NCHS confidentiality standards.
2020-12-30	2020-02-01	2020-12-26	Colorado	5-14 years	Non-Hispanic Black	0	10	0	0	0	0
2020-12-30	2020-02-01	2020-12-26	Colorado	15-24 years	Non-Hispanic Black		57		0	0		One or more data cells have counts between 1-9 and have been suppressed in accordance with NCHS confidentiality standards.
2020-12-30	2020-02-01	2020-12-26	Colorado	18-29 years	Non-Hispanic Black		106		0	0		One or more data cells have counts between 1-9 and have been suppressed in accordance with NCHS confidentiality standards.
2020-12-30	2020-02-01	2020-12-26	Colorado	25-34 years	Non-Hispanic Black	0	120		0	0		One or more data cells have counts between 1-9 and have been suppressed in accordance with NCHS confidentiality standards.
2020-12-30	2020-02-01	2020-12-26	Colorado	30-49 years	Non-Hispanic Black		231			0	15	One or more data cells have counts between 1-9 and have been suppressed in accordance with NCHS confidentiality standards.
2020-12-30	2020-02-01	2020-12-26	Colorado	35-44 years	Non-Hispanic Black		111		0	0		One or more data cells have counts between 1-9 and have been suppressed in accordance with NCHS confidentiality standards.
2020-12-30	2020-02-01	2020-12-26	Colorado	45-54 years	Non-Hispanic Black	13	144	14			20	One or more data cells have counts between 1-9 and have been suppressed in accordance with NCHS confidentiality standards.
2020-12-30	2020-02-01	2020-12-26	Colorado	50-64 years	Non-Hispanic Black	42	393	39	24		58	One or more data cells have counts between 1-9 and have been suppressed in accordance with NCHS confidentiality standards.
2020-12-30	2020-02-01	2020-12-26	Colorado	55-64 years	Non-Hispanic Black	33	308	30	18	0	45
2020-12-30	2020-02-01	2020-12-26	Colorado	65-74 years	Non-Hispanic Black	45	384	40	24	0	61
2020-12-30	2020-02-01	2020-12-26	Colorado	75-84 years	Non-Hispanic Black	55	344	40	26		70	One or more data cells have counts between 1-9 and have been suppressed in accordance with NCHS confidentiality standards.
2020-12-30	2020-02-01	2020-12-26	Colorado	85 years and over	Non-Hispanic Black	43	295	24	19		49	One or more data cells have counts between 1-9 and have been suppressed in accordance with NCHS confidentiality standards.
2020-12-30	2020-02-01	2020-12-26	Colorado	Under 1 year	Non-Hispanic American Indian or Alaska Native	0		0	0	0	0	One or more data cells have counts between 1-9 and have been suppressed in accordance with NCHS confidentiality standards.
2020-12-30	2020-02-01	2020-12-26	Colorado	0-17 years	Non-Hispanic American Indian or Alaska Native	0		0	0	0	0	One or more data cells have counts between 1-9 and have been suppressed in accordance with NCHS confidentiality standards.
2020-12-30	2020-02-01	2020-12-26	Colorado	1-4 years	Non-Hispanic American Indian or Alaska Native	0	0	0	0	0	0
2020-12-30	2020-02-01	2020-12-26	Colorado	5-14 years	Non-Hispanic American Indian or Alaska Native	0	0	0	0	0	0
2020-12-30	2020-02-01	2020-12-26	Colorado	15-24 years	Non-Hispanic American Indian or Alaska Native	0	10	0	0	0	0
2020-12-30	2020-02-01	2020-12-26	Colorado	18-29 years	Non-Hispanic American Indian or Alaska Native	0	11	0	0	0	0
2020-12-30	2020-02-01	2020-12-26	Colorado	25-34 years	Non-Hispanic American Indian or Alaska Native		33			0		One or more data cells have counts between 1-9 and have been suppressed in accordance with NCHS confidentiality standards.
2020-12-30	2020-02-01	2020-12-26	Colorado	30-49 years	Non-Hispanic American Indian or Alaska Native		94	10		0	13	One or more data cells have counts between 1-9 and have been suppressed in accordance with NCHS confidentiality standards.
2020-12-30	2020-02-01	2020-12-26	Colorado	35-44 years	Non-Hispanic American Indian or Alaska Native		40			0		One or more data cells have counts between 1-9 and have been suppressed in accordance with NCHS confidentiality standards.
2020-12-30	2020-02-01	2020-12-26	Colorado	45-54 years	Non-Hispanic American Indian or Alaska Native		49			0		One or more data cells have counts between 1-9 and have been suppressed in accordance with NCHS confidentiality standards.
2020-12-30	2020-02-01	2020-12-26	Colorado	50-64 years	Non-Hispanic American Indian or Alaska Native	14	86	12	11	0	15
2020-12-30	2020-02-01	2020-12-26	Colorado	55-64 years	Non-Hispanic American Indian or Alaska Native	11	62	10		0	12	One or more data cells have counts between 1-9 and have been suppressed in accordance with NCHS confidentiality standards.
2020-12-30	2020-02-01	2020-12-26	Colorado	65-74 years	Non-Hispanic American Indian or Alaska Native	13	68	14	10	0	17
2020-12-30	2020-02-01	2020-12-26	Colorado	75-84 years	Non-Hispanic American Indian or Alaska Native		47			0		One or more data cells have counts between 1-9 and have been suppressed in accordance with NCHS confidentiality standards.
2020-12-30	2020-02-01	2020-12-26	Colorado	85 years and over	Non-Hispanic American Indian or Alaska Native		27			0		One or more data cells have counts between 1-9 and have been suppressed in accordance with NCHS confidentiality standards.
2020-12-30	2020-02-01	2020-12-26	Colorado	Under 1 year	Non-Hispanic Asian	0		0	0	0	0	One or more data cells have counts between 1-9 and have been suppressed in accordance with NCHS confidentiality standards.
2020-12-30	2020-02-01	2020-12-26	Colorado	0-17 years	Non-Hispanic Asian		11	0	0	0		One or more data cells have counts between 1-9 and have been suppressed in accordance with NCHS confidentiality standards.
2020-12-30	2020-02-01	2020-12-26	Colorado	1-4 years	Non-Hispanic Asian	0	0	0	0	0	0
2020-12-30	2020-02-01	2020-12-26	Colorado	5-14 years	Non-Hispanic Asian			0	0	0		One or more data cells have counts between 1-9 and have been suppressed in accordance with NCHS confidentiality standards.
2020-12-30	2020-02-01	2020-12-26	Colorado	15-24 years	Non-Hispanic Asian	0	11	0	0	0	0
2020-12-30	2020-02-01	2020-12-26	Colorado	18-29 years	Non-Hispanic Asian	0	16	0	0	0	0
2020-12-30	2020-02-01	2020-12-26	Colorado	25-34 years	Non-Hispanic Asian	0	16	0	0	0	0
2020-12-30	2020-02-01	2020-12-26	Colorado	30-49 years	Non-Hispanic Asian		63			0		One or more data cells have counts between 1-9 and have been suppressed in accordance with NCHS confidentiality standards.
2020-12-30	2020-02-01	2020-12-26	Colorado	35-44 years	Non-Hispanic Asian		30			0		One or more data cells have counts between 1-9 and have been suppressed in accordance with NCHS confidentiality standards.
2020-12-30	2020-02-01	2020-12-26	Colorado	45-54 years	Non-Hispanic Asian		57			0		One or more data cells have counts between 1-9 and have been suppressed in accordance with NCHS confidentiality standards.
2020-12-30	2020-02-01	2020-12-26	Colorado	50-64 years	Non-Hispanic Asian	20	125	17	10	0	27
2020-12-30	2020-02-01	2020-12-26	Colorado	55-64 years	Non-Hispanic Asian	18	91	14	10	0	22
2020-12-30	2020-02-01	2020-12-26	Colorado	65-74 years	Non-Hispanic Asian	31	131	19	12	0	38
2020-12-30	2020-02-01	2020-12-26	Colorado	75-84 years	Non-Hispanic Asian	38	157	22	18	0	42
2020-12-30	2020-02-01	2020-12-26	Colorado	85 years and over	Non-Hispanic Asian	42	250	26	12	0	56
2020-12-30	2020-02-01	2020-12-26	Colorado	Under 1 year	Non-Hispanic Native Hawaiian or Other Pacific Islander	0		0	0	0	0	One or more data cells have counts between 1-9 and have been suppressed in accordance with NCHS confidentiality standards.
2020-12-30	2020-02-01	2020-12-26	Colorado	0-17 years	Non-Hispanic Native Hawaiian or Other Pacific Islander	0			0	0		One or more data cells have counts between 1-9 and have been suppressed in accordance with NCHS confidentiality standards.
2020-12-30	2020-02-01	2020-12-26	Colorado	1-4 years	Non-Hispanic Native Hawaiian or Other Pacific Islander	0			0	0		One or more data cells have counts between 1-9 and have been suppressed in accordance with NCHS confidentiality standards.
2020-12-30	2020-02-01	2020-12-26	Colorado	5-14 years	Non-Hispanic Native Hawaiian or Other Pacific Islander	0	0	0	0	0	0
2020-12-30	2020-02-01	2020-12-26	Colorado	15-24 years	Non-Hispanic Native Hawaiian or Other Pacific Islander	0		0	0	0	0	One or more data cells have counts between 1-9 and have been suppressed in accordance with NCHS confidentiality standards.
2020-12-30	2020-02-01	2020-12-26	Colorado	18-29 years	Non-Hispanic Native Hawaiian or Other Pacific Islander					0		One or more data cells have counts between 1-9 and have been suppressed in accordance with NCHS confidentiality standards.
2020-12-30	2020-02-01	2020-12-26	Colorado	25-34 years	Non-Hispanic Native Hawaiian or Other Pacific Islander					0		One or more data cells have counts between 1-9 and have been suppressed in accordance with NCHS confidentiality standards.
2020-12-30	2020-02-01	2020-12-26	Colorado	30-49 years	Non-Hispanic Native Hawaiian or Other Pacific Islander							One or more data cells have counts between 1-9 and have been suppressed in accordance with NCHS confidentiality standards.
2020-12-30	2020-02-01	2020-12-26	Colorado	35-44 years	Non-Hispanic Native Hawaiian or Other Pacific Islander					0		One or more data cells have counts between 1-9 and have been suppressed in accordance with NCHS confidentiality standards.
2020-12-30	2020-02-01	2020-12-26	Colorado	45-54 years	Non-Hispanic Native Hawaiian or Other Pacific Islander	0		0	0			One or more data cells have counts between 1-9 and have been suppressed in accordance with NCHS confidentiality standards.
2020-12-30	2020-02-01	2020-12-26	Colorado	50-64 years	Non-Hispanic Native Hawaiian or Other Pacific Islander		10			0		One or more data cells have counts between 1-9 and have been suppressed in accordance with NCHS confidentiality standards.
2020-12-30	2020-02-01	2020-12-26	Colorado	55-64 years	Non-Hispanic Native Hawaiian or Other Pacific Islander					0		One or more data cells have counts between 1-9 and have been suppressed in accordance with NCHS confidentiality standards.
2020-12-30	2020-02-01	2020-12-26	Colorado	65-74 years	Non-Hispanic Native Hawaiian or Other Pacific Islander					0		One or more data cells have counts between 1-9 and have been suppressed in accordance with NCHS confidentiality standards.
2020-12-30	2020-02-01	2020-12-26	Colorado	75-84 years	Non-Hispanic Native Hawaiian or Other Pacific Islander					0		One or more data cells have counts between 1-9 and have been suppressed in accordance with NCHS confidentiality standards.
2020-12-30	2020-02-01	2020-12-26	Colorado	85 years and over	Non-Hispanic Native Hawaiian or Other Pacific Islander	0		0	0	0	0	One or more data cells have counts between 1-9 and have been suppressed in accordance with NCHS confidentiality standards.
2020-12-30	2020-02-01	2020-12-26	Colorado	Under 1 year	Non-Hispanic More than one race	0		0	0	0	0	One or more data cells have counts between 1-9 and have been suppressed in accordance with NCHS confidentiality standards.
2020-12-30	2020-02-01	2020-12-26	Colorado	0-17 years	Non-Hispanic More than one race	0	12	0	0	0	0
2020-12-30	2020-02-01	2020-12-26	Colorado	1-4 years	Non-Hispanic More than one race	0	0	0	0	0	0
2020-12-30	2020-02-01	2020-12-26	Colorado	5-14 years	Non-Hispanic More than one race	0		0	0	0	0	One or more data cells have counts between 1-9 and have been suppressed in accordance with NCHS confidentiality standards.
2020-12-30	2020-02-01	2020-12-26	Colorado	15-24 years	Non-Hispanic More than one race	0	12		0	0		One or more data cells have counts between 1-9 and have been suppressed in accordance with NCHS confidentiality standards.
2020-12-30	2020-02-01	2020-12-26	Colorado	18-29 years	Non-Hispanic More than one race	0	18		0	0		One or more data cells have counts between 1-9 and have been suppressed in accordance with NCHS confidentiality standards.
2020-12-30	2020-02-01	2020-12-26	Colorado	25-34 years	Non-Hispanic More than one race	0	23		0	0		One or more data cells have counts between 1-9 and have been suppressed in accordance with NCHS confidentiality standards.
2020-12-30	2020-02-01	2020-12-26	Colorado	30-49 years	Non-Hispanic More than one race		46			0		One or more data cells have counts between 1-9 and have been suppressed in accordance with NCHS confidentiality standards.
2020-12-30	2020-02-01	2020-12-26	Colorado	35-44 years	Non-Hispanic More than one race		19			0		One or more data cells have counts between 1-9 and have been suppressed in accordance with NCHS confidentiality standards.
2020-12-30	2020-02-01	2020-12-26	Colorado	45-54 years	Non-Hispanic More than one race		22			0		One or more data cells have counts between 1-9 and have been suppressed in accordance with NCHS confidentiality standards.
2020-12-30	2020-02-01	2020-12-26	Colorado	50-64 years	Non-Hispanic More than one race		39					One or more data cells have counts between 1-9 and have been suppressed in accordance with NCHS confidentiality standards.
2020-12-30	2020-02-01	2020-12-26	Colorado	55-64 years	Non-Hispanic More than one race		30					One or more data cells have counts between 1-9 and have been suppressed in accordance with NCHS confidentiality standards.
2020-12-30	2020-02-01	2020-12-26	Colorado	65-74 years	Non-Hispanic More than one race		39			0		One or more data cells have counts between 1-9 and have been suppressed in accordance with NCHS confidentiality standards.
2020-12-30	2020-02-01	2020-12-26	Colorado	75-84 years	Non-Hispanic More than one race		20	0	0	0		One or more data cells have counts between 1-9 and have been suppressed in accordance with NCHS confidentiality standards.
2020-12-30	2020-02-01	2020-12-26	Colorado	85 years and over	Non-Hispanic More than one race		12			0		One or more data cells have counts between 1-9 and have been suppressed in accordance with NCHS confidentiality standards.
2020-12-30	2020-02-01	2020-12-26	Colorado	Under 1 year	Hispanic	0	95		0			One or more data cells have counts between 1-9 and have been suppressed in accordance with NCHS confidentiality standards.
2020-12-30	2020-02-01	2020-12-26	Colorado	0-17 years	Hispanic		186					One or more data cells have counts between 1-9 and have been suppressed in accordance with NCHS confidentiality standards.
2020-12-30	2020-02-01	2020-12-26	Colorado	1-4 years	Hispanic	0	17	0	0	0	0
2020-12-30	2020-02-01	2020-12-26	Colorado	5-14 years	Hispanic	0	25		0	0		One or more data cells have counts between 1-9 and have been suppressed in accordance with NCHS confidentiality standards.
2020-12-30	2020-02-01	2020-12-26	Colorado	15-24 years	Hispanic		240			0		One or more data cells have counts between 1-9 and have been suppressed in accordance with NCHS confidentiality standards.
2020-12-30	2020-02-01	2020-12-26	Colorado	18-29 years	Hispanic		356			0		One or more data cells have counts between 1-9 and have been suppressed in accordance with NCHS confidentiality standards.
2020-12-30	2020-02-01	2020-12-26	Colorado	25-34 years	Hispanic		339		0	0	12	One or more data cells have counts between 1-9 and have been suppressed in accordance with NCHS confidentiality standards.
2020-12-30	2020-02-01	2020-12-26	Colorado	30-49 years	Hispanic	72	854	69	39		105	One or more data cells have counts between 1-9 and have been suppressed in accordance with NCHS confidentiality standards.
2020-12-30	2020-02-01	2020-12-26	Colorado	35-44 years	Hispanic	29	415	30	15		46	One or more data cells have counts between 1-9 and have been suppressed in accordance with NCHS confidentiality standards.
2020-12-30	2020-02-01	2020-12-26	Colorado	45-54 years	Hispanic	92	591	76	54		118	One or more data cells have counts between 1-9 and have been suppressed in accordance with NCHS confidentiality standards.
2020-12-30	2020-02-01	2020-12-26	Colorado	50-64 years	Hispanic	205	1251	170	118		263	One or more data cells have counts between 1-9 and have been suppressed in accordance with NCHS confidentiality standards.
2020-12-30	2020-02-01	2020-12-26	Colorado	55-64 years	Hispanic	155	925	127	88		197	One or more data cells have counts between 1-9 and have been suppressed in accordance with NCHS confidentiality standards.
2020-12-30	2020-02-01	2020-12-26	Colorado	65-74 years	Hispanic	223	1073	183	131		279	One or more data cells have counts between 1-9 and have been suppressed in accordance with NCHS confidentiality standards.
2020-12-30	2020-02-01	2020-12-26	Colorado	75-84 years	Hispanic	252	1211	210	156		307	One or more data cells have counts between 1-9 and have been suppressed in accordance with NCHS confidentiality standards.
2020-12-30	2020-02-01	2020-12-26	Colorado	85 years and over	Hispanic	236	1178	162	114		285	One or more data cells have counts between 1-9 and have been suppressed in accordance with NCHS confidentiality standards.
2020-12-30	2020-02-01	2020-12-26	Colorado	Under 1 year	Unknown	0	14	0	0	0	0
2020-12-30	2020-02-01	2020-12-26	Colorado	0-17 years	Unknown	0	15	0	0	0	0
2020-12-30	2020-02-01	2020-12-26	Colorado	1-4 years	Unknown	0	0	0	0	0	0
2020-12-30	2020-02-01	2020-12-26	Colorado	5-14 years	Unknown	0	0	0	0	0	0
2020-12-30	2020-02-01	2020-12-26	Colorado	15-24 years	Unknown	0		0	0	0	0	One or more data cells have counts between 1-9 and have been suppressed in accordance with NCHS confidentiality standards.
2020-12-30	2020-02-01	2020-12-26	Colorado	18-29 years	Unknown	0		0	0	0	0	One or more data cells have counts between 1-9 and have been suppressed in accordance with NCHS confidentiality standards.
2020-12-30	2020-02-01	2020-12-26	Colorado	25-34 years	Unknown	0		0	0	0	0	One or more data cells have counts between 1-9 and have been suppressed in accordance with NCHS confidentiality standards.
2020-12-30	2020-02-01	2020-12-26	Colorado	30-49 years	Unknown	0	10		0	0		One or more data cells have counts between 1-9 and have been suppressed in accordance with NCHS confidentiality standards.
2020-12-30	2020-02-01	2020-12-26	Colorado	35-44 years	Unknown	0			0	0		One or more data cells have counts between 1-9 and have been suppressed in accordance with NCHS confidentiality standards.
2020-12-30	2020-02-01	2020-12-26	Colorado	45-54 years	Unknown	0	16		0	0		One or more data cells have counts between 1-9 and have been suppressed in accordance with NCHS confidentiality standards.
2020-12-30	2020-02-01	2020-12-26	Colorado	50-64 years	Unknown		60			0		One or more data cells have counts between 1-9 and have been suppressed in accordance with NCHS confidentiality standards.
2020-12-30	2020-02-01	2020-12-26	Colorado	55-64 years	Unknown		48			0		One or more data cells have counts between 1-9 and have been suppressed in accordance with NCHS confidentiality standards.
2020-12-30	2020-02-01	2020-12-26	Colorado	65-74 years	Unknown		43			0	12	One or more data cells have counts between 1-9 and have been suppressed in accordance with NCHS confidentiality standards.
2020-12-30	2020-02-01	2020-12-26	Colorado	75-84 years	Unknown		25			0		One or more data cells have counts between 1-9 and have been suppressed in accordance with NCHS confidentiality standards.
2020-12-30	2020-02-01	2020-12-26	Colorado	85 years and over	Unknown		21			0		One or more data cells have counts between 1-9 and have been suppressed in accordance with NCHS confidentiality standards.
2020-12-30	2020-02-01	2020-12-26	Connecticut	Under 1 year	Non-Hispanic White	0	32	0	0	0	0
2020-12-30	2020-02-01	2020-12-26	Connecticut	0-17 years	Non-Hispanic White	0	61		0	0		One or more data cells have counts between 1-9 and have been suppressed in accordance with NCHS confidentiality standards.
2020-12-30	2020-02-01	2020-12-26	Connecticut	1-4 years	Non-Hispanic White	0		0	0	0	0	One or more data cells have counts between 1-9 and have been suppressed in accordance with NCHS confidentiality standards.
2020-12-30	2020-02-01	2020-12-26	Connecticut	5-14 years	Non-Hispanic White	0			0	0		One or more data cells have counts between 1-9 and have been suppressed in accordance with NCHS confidentiality standards.
2020-12-30	2020-02-01	2020-12-26	Connecticut	15-24 years	Non-Hispanic White	0	114	0	0	0	0
2020-12-30	2020-02-01	2020-12-26	Connecticut	18-29 years	Non-Hispanic White		233	0	0			One or more data cells have counts between 1-9 and have been suppressed in accordance with NCHS confidentiality standards.
2020-12-30	2020-02-01	2020-12-26	Connecticut	25-34 years	Non-Hispanic White		350				11	One or more data cells have counts between 1-9 and have been suppressed in accordance with NCHS confidentiality standards.
2020-12-30	2020-02-01	2020-12-26	Connecticut	30-49 years	Non-Hispanic White	27	1006	19			44	One or more data cells have counts between 1-9 and have been suppressed in accordance with NCHS confidentiality standards.
2020-12-30	2020-02-01	2020-12-26	Connecticut	35-44 years	Non-Hispanic White		446		0	0	14	One or more data cells have counts between 1-9 and have been suppressed in accordance with NCHS confidentiality standards.
2020-12-30	2020-02-01	2020-12-26	Connecticut	45-54 years	Non-Hispanic White	46	924	31			74	One or more data cells have counts between 1-9 and have been suppressed in accordance with NCHS confidentiality standards.
2020-12-30	2020-02-01	2020-12-26	Connecticut	50-64 years	Non-Hispanic White	233	3021	149	56	11	337
2020-12-30	2020-02-01	2020-12-26	Connecticut	55-64 years	Non-Hispanic White	203	2442	126	49		286	One or more data cells have counts between 1-9 and have been suppressed in accordance with NCHS confidentiality standards.
2020-12-30	2020-02-01	2020-12-26	Connecticut	65-74 years	Non-Hispanic White	542	3938	336	137	12	750
2020-12-30	2020-02-01	2020-12-26	Connecticut	75-84 years	Non-Hispanic White	965	5853	514	240	16	1255
2020-12-30	2020-02-01	2020-12-26	Connecticut	85 years and over	Non-Hispanic White	1980	10549	880	396	20	2484
2020-12-30	2020-02-01	2020-12-26	Connecticut	Under 1 year	Non-Hispanic Black		29	0	0	0		One or more data cells have counts between 1-9 and have been suppressed in accordance with NCHS confidentiality standards.
2020-12-30	2020-02-01	2020-12-26	Connecticut	0-17 years	Non-Hispanic Black		37	0	0	0		One or more data cells have counts between 1-9 and have been suppressed in accordance with NCHS confidentiality standards.
2020-12-30	2020-02-01	2020-12-26	Connecticut	1-4 years	Non-Hispanic Black	0		0	0	0	0	One or more data cells have counts between 1-9 and have been suppressed in accordance with NCHS confidentiality standards.
2020-12-30	2020-02-01	2020-12-26	Connecticut	5-14 years	Non-Hispanic Black	0		0	0	0	0	One or more data cells have counts between 1-9 and have been suppressed in accordance with NCHS confidentiality standards.
2020-12-30	2020-02-01	2020-12-26	Connecticut	15-24 years	Non-Hispanic Black	0	41		0	0		One or more data cells have counts between 1-9 and have been suppressed in accordance with NCHS confidentiality standards.
2020-12-30	2020-02-01	2020-12-26	Connecticut	18-29 years	Non-Hispanic Black		84			0		One or more data cells have counts between 1-9 and have been suppressed in accordance with NCHS confidentiality standards.
2020-12-30	2020-02-01	2020-12-26	Connecticut	25-34 years	Non-Hispanic Black		97			0		One or more data cells have counts between 1-9 and have been suppressed in accordance with NCHS confidentiality standards.
2020-12-30	2020-02-01	2020-12-26	Connecticut	30-49 years	Non-Hispanic Black	24	299			0	31	One or more data cells have counts between 1-9 and have been suppressed in accordance with NCHS confidentiality standards.
2020-12-30	2020-02-01	2020-12-26	Connecticut	35-44 years	Non-Hispanic Black		139			0		One or more data cells have counts between 1-9 and have been suppressed in accordance with NCHS confidentiality standards.
2020-12-30	2020-02-01	2020-12-26	Connecticut	45-54 years	Non-Hispanic Black	37	254	15	10	0	42
2020-12-30	2020-02-01	2020-12-26	Connecticut	50-64 years	Non-Hispanic Black	133	664	56	32		160	One or more data cells have counts between 1-9 and have been suppressed in accordance with NCHS confidentiality standards.
2020-12-30	2020-02-01	2020-12-26	Connecticut	55-64 years	Non-Hispanic Black	114	519	45	23		139	One or more data cells have counts between 1-9 and have been suppressed in accordance with NCHS confidentiality standards.
2020-12-30	2020-02-01	2020-12-26	Connecticut	65-74 years	Non-Hispanic Black	177	586	63	45		196	One or more data cells have counts between 1-9 and have been suppressed in accordance with NCHS confidentiality standards.
2020-12-30	2020-02-01	2020-12-26	Connecticut	75-84 years	Non-Hispanic Black	208	680	70	50		230	One or more data cells have counts between 1-9 and have been suppressed in accordance with NCHS confidentiality standards.
2020-12-30	2020-02-01	2020-12-26	Connecticut	85 years and over	Non-Hispanic Black	192	587	61	47		207	One or more data cells have counts between 1-9 and have been suppressed in accordance with NCHS confidentiality standards.
2020-12-30	2020-02-01	2020-12-26	Connecticut	Under 1 year	Non-Hispanic American Indian or Alaska Native	0	0	0	0	0	0
2020-12-30	2020-02-01	2020-12-26	Connecticut	0-17 years	Non-Hispanic American Indian or Alaska Native	0	0	0	0	0	0
2020-12-30	2020-02-01	2020-12-26	Connecticut	1-4 years	Non-Hispanic American Indian or Alaska Native	0	0	0	0	0	0
2020-12-30	2020-02-01	2020-12-26	Connecticut	5-14 years	Non-Hispanic American Indian or Alaska Native	0	0	0	0	0	0
2020-12-30	2020-02-01	2020-12-26	Connecticut	15-24 years	Non-Hispanic American Indian or Alaska Native	0	0	0	0	0	0
2020-12-30	2020-02-01	2020-12-26	Connecticut	18-29 years	Non-Hispanic American Indian or Alaska Native	0		0	0	0	0	One or more data cells have counts between 1-9 and have been suppressed in accordance with NCHS confidentiality standards.
2020-12-30	2020-02-01	2020-12-26	Connecticut	25-34 years	Non-Hispanic American Indian or Alaska Native	0		0	0	0	0	One or more data cells have counts between 1-9 and have been suppressed in accordance with NCHS confidentiality standards.
2020-12-30	2020-02-01	2020-12-26	Connecticut	30-49 years	Non-Hispanic American Indian or Alaska Native	0		0	0	0	0	One or more data cells have counts between 1-9 and have been suppressed in accordance with NCHS confidentiality standards.
2020-12-30	2020-02-01	2020-12-26	Connecticut	35-44 years	Non-Hispanic American Indian or Alaska Native	0		0	0	0	0	One or more data cells have counts between 1-9 and have been suppressed in accordance with NCHS confidentiality standards.
2020-12-30	2020-02-01	2020-12-26	Connecticut	45-54 years	Non-Hispanic American Indian or Alaska Native	0		0	0	0	0	One or more data cells have counts between 1-9 and have been suppressed in accordance with NCHS confidentiality standards.
2020-12-30	2020-02-01	2020-12-26	Connecticut	50-64 years	Non-Hispanic American Indian or Alaska Native	0		0	0	0	0	One or more data cells have counts between 1-9 and have been suppressed in accordance with NCHS confidentiality standards.
2020-12-30	2020-02-01	2020-12-26	Connecticut	55-64 years	Non-Hispanic American Indian or Alaska Native	0		0	0	0	0	One or more data cells have counts between 1-9 and have been suppressed in accordance with NCHS confidentiality standards.
2020-12-30	2020-02-01	2020-12-26	Connecticut	65-74 years	Non-Hispanic American Indian or Alaska Native					0		One or more data cells have counts between 1-9 and have been suppressed in accordance with NCHS confidentiality standards.
2020-12-30	2020-02-01	2020-12-26	Connecticut	75-84 years	Non-Hispanic American Indian or Alaska Native	0			0	0		One or more data cells have counts between 1-9 and have been suppressed in accordance with NCHS confidentiality standards.
2020-12-30	2020-02-01	2020-12-26	Connecticut	85 years and over	Non-Hispanic American Indian or Alaska Native			0	0	0		One or more data cells have counts between 1-9 and have been suppressed in accordance with NCHS confidentiality standards.
2020-12-30	2020-02-01	2020-12-26	Connecticut	Under 1 year	Non-Hispanic Asian	0		0	0	0	0	One or more data cells have counts between 1-9 and have been suppressed in accordance with NCHS confidentiality standards.
2020-12-30	2020-02-01	2020-12-26	Connecticut	0-17 years	Non-Hispanic Asian	0		0	0	0	0	One or more data cells have counts between 1-9 and have been suppressed in accordance with NCHS confidentiality standards.
2020-12-30	2020-02-01	2020-12-26	Connecticut	1-4 years	Non-Hispanic Asian	0		0	0	0	0	One or more data cells have counts between 1-9 and have been suppressed in accordance with NCHS confidentiality standards.
2020-12-30	2020-02-01	2020-12-26	Connecticut	5-14 years	Non-Hispanic Asian	0		0	0	0	0	One or more data cells have counts between 1-9 and have been suppressed in accordance with NCHS confidentiality standards.
2020-12-30	2020-02-01	2020-12-26	Connecticut	15-24 years	Non-Hispanic Asian	0		0	0	0	0	One or more data cells have counts between 1-9 and have been suppressed in accordance with NCHS confidentiality standards.
2020-12-30	2020-02-01	2020-12-26	Connecticut	18-29 years	Non-Hispanic Asian	0		0	0	0	0	One or more data cells have counts between 1-9 and have been suppressed in accordance with NCHS confidentiality standards.
2020-12-30	2020-02-01	2020-12-26	Connecticut	25-34 years	Non-Hispanic Asian	0		0	0	0	0	One or more data cells have counts between 1-9 and have been suppressed in accordance with NCHS confidentiality standards.
2020-12-30	2020-02-01	2020-12-26	Connecticut	30-49 years	Non-Hispanic Asian		40	0	0	0		One or more data cells have counts between 1-9 and have been suppressed in accordance with NCHS confidentiality standards.
2020-12-30	2020-02-01	2020-12-26	Connecticut	35-44 years	Non-Hispanic Asian		16	0	0	0		One or more data cells have counts between 1-9 and have been suppressed in accordance with NCHS confidentiality standards.
2020-12-30	2020-02-01	2020-12-26	Connecticut	45-54 years	Non-Hispanic Asian		35			0		One or more data cells have counts between 1-9 and have been suppressed in accordance with NCHS confidentiality standards.
2020-12-30	2020-02-01	2020-12-26	Connecticut	50-64 years	Non-Hispanic Asian	14	72			0	18	One or more data cells have counts between 1-9 and have been suppressed in accordance with NCHS confidentiality standards.
2020-12-30	2020-02-01	2020-12-26	Connecticut	55-64 years	Non-Hispanic Asian	12	55			0	15	One or more data cells have counts between 1-9 and have been suppressed in accordance with NCHS confidentiality standards.
2020-12-30	2020-02-01	2020-12-26	Connecticut	65-74 years	Non-Hispanic Asian	13	77	13		0	22	One or more data cells have counts between 1-9 and have been suppressed in accordance with NCHS confidentiality standards.
2020-12-30	2020-02-01	2020-12-26	Connecticut	75-84 years	Non-Hispanic Asian	16	91			0	19	One or more data cells have counts between 1-9 and have been suppressed in accordance with NCHS confidentiality standards.
2020-12-30	2020-02-01	2020-12-26	Connecticut	85 years and over	Non-Hispanic Asian	19	107			0	23	One or more data cells have counts between 1-9 and have been suppressed in accordance with NCHS confidentiality standards.
2020-12-30	2020-02-01	2020-12-26	Connecticut	Under 1 year	Non-Hispanic Native Hawaiian or Other Pacific Islander	0		0	0	0	0	One or more data cells have counts between 1-9 and have been suppressed in accordance with NCHS confidentiality standards.
2020-12-30	2020-02-01	2020-12-26	Connecticut	0-17 years	Non-Hispanic Native Hawaiian or Other Pacific Islander	0		0	0	0	0	One or more data cells have counts between 1-9 and have been suppressed in accordance with NCHS confidentiality standards.
2020-12-30	2020-02-01	2020-12-26	Connecticut	1-4 years	Non-Hispanic Native Hawaiian or Other Pacific Islander	0	0	0	0	0	0
2020-12-30	2020-02-01	2020-12-26	Connecticut	5-14 years	Non-Hispanic Native Hawaiian or Other Pacific Islander	0		0	0	0	0	One or more data cells have counts between 1-9 and have been suppressed in accordance with NCHS confidentiality standards.
2020-12-30	2020-02-01	2020-12-26	Connecticut	15-24 years	Non-Hispanic Native Hawaiian or Other Pacific Islander	0	0	0	0	0	0
2020-12-30	2020-02-01	2020-12-26	Connecticut	18-29 years	Non-Hispanic Native Hawaiian or Other Pacific Islander	0		0	0	0	0	One or more data cells have counts between 1-9 and have been suppressed in accordance with NCHS confidentiality standards.
2020-12-30	2020-02-01	2020-12-26	Connecticut	25-34 years	Non-Hispanic Native Hawaiian or Other Pacific Islander	0		0	0	0	0	One or more data cells have counts between 1-9 and have been suppressed in accordance with NCHS confidentiality standards.
2020-12-30	2020-02-01	2020-12-26	Connecticut	30-49 years	Non-Hispanic Native Hawaiian or Other Pacific Islander	0	0	0	0	0	0
2020-12-30	2020-02-01	2020-12-26	Connecticut	35-44 years	Non-Hispanic Native Hawaiian or Other Pacific Islander	0	0	0	0	0	0
2020-12-30	2020-02-01	2020-12-26	Connecticut	45-54 years	Non-Hispanic Native Hawaiian or Other Pacific Islander	0	0	0	0	0	0
2020-12-30	2020-02-01	2020-12-26	Connecticut	50-64 years	Non-Hispanic Native Hawaiian or Other Pacific Islander	0		0	0	0	0	One or more data cells have counts between 1-9 and have been suppressed in accordance with NCHS confidentiality standards.
2020-12-30	2020-02-01	2020-12-26	Connecticut	55-64 years	Non-Hispanic Native Hawaiian or Other Pacific Islander	0		0	0	0	0	One or more data cells have counts between 1-9 and have been suppressed in accordance with NCHS confidentiality standards.
2020-12-30	2020-02-01	2020-12-26	Connecticut	65-74 years	Non-Hispanic Native Hawaiian or Other Pacific Islander	0	0	0	0	0	0
2020-12-30	2020-02-01	2020-12-26	Connecticut	75-84 years	Non-Hispanic Native Hawaiian or Other Pacific Islander	0	0	0	0	0	0
2020-12-30	2020-02-01	2020-12-26	Connecticut	85 years and over	Non-Hispanic Native Hawaiian or Other Pacific Islander	0		0	0	0	0	One or more data cells have counts between 1-9 and have been suppressed in accordance with NCHS confidentiality standards.
2020-12-30	2020-02-01	2020-12-26	Connecticut	Under 1 year	Non-Hispanic More than one race	0	0	0	0	0	0
2020-12-30	2020-02-01	2020-12-26	Connecticut	0-17 years	Non-Hispanic More than one race	0	0	0	0	0	0
2020-12-30	2020-02-01	2020-12-26	Connecticut	1-4 years	Non-Hispanic More than one race	0	0	0	0	0	0
2020-12-30	2020-02-01	2020-12-26	Connecticut	5-14 years	Non-Hispanic More than one race	0	0	0	0	0	0
2020-12-30	2020-02-01	2020-12-26	Connecticut	15-24 years	Non-Hispanic More than one race	0		0	0	0	0	One or more data cells have counts between 1-9 and have been suppressed in accordance with NCHS confidentiality standards.
2020-12-30	2020-02-01	2020-12-26	Connecticut	18-29 years	Non-Hispanic More than one race	0		0	0	0	0	One or more data cells have counts between 1-9 and have been suppressed in accordance with NCHS confidentiality standards.
2020-12-30	2020-02-01	2020-12-26	Connecticut	25-34 years	Non-Hispanic More than one race	0		0	0	0	0	One or more data cells have counts between 1-9 and have been suppressed in accordance with NCHS confidentiality standards.
2020-12-30	2020-02-01	2020-12-26	Connecticut	30-49 years	Non-Hispanic More than one race	0		0	0	0	0	One or more data cells have counts between 1-9 and have been suppressed in accordance with NCHS confidentiality standards.
2020-12-30	2020-02-01	2020-12-26	Connecticut	35-44 years	Non-Hispanic More than one race	0		0	0	0	0	One or more data cells have counts between 1-9 and have been suppressed in accordance with NCHS confidentiality standards.
2020-12-30	2020-02-01	2020-12-26	Connecticut	45-54 years	Non-Hispanic More than one race	0		0	0	0	0	One or more data cells have counts between 1-9 and have been suppressed in accordance with NCHS confidentiality standards.
2020-12-30	2020-02-01	2020-12-26	Connecticut	50-64 years	Non-Hispanic More than one race	0		0	0	0	0	One or more data cells have counts between 1-9 and have been suppressed in accordance with NCHS confidentiality standards.
2020-12-30	2020-02-01	2020-12-26	Connecticut	55-64 years	Non-Hispanic More than one race	0		0	0	0	0	One or more data cells have counts between 1-9 and have been suppressed in accordance with NCHS confidentiality standards.
2020-12-30	2020-02-01	2020-12-26	Connecticut	65-74 years	Non-Hispanic More than one race	0		0	0	0	0	One or more data cells have counts between 1-9 and have been suppressed in accordance with NCHS confidentiality standards.
2020-12-30	2020-02-01	2020-12-26	Connecticut	75-84 years	Non-Hispanic More than one race					0		One or more data cells have counts between 1-9 and have been suppressed in accordance with NCHS confidentiality standards.
2020-12-30	2020-02-01	2020-12-26	Connecticut	85 years and over	Non-Hispanic More than one race				0	0		One or more data cells have counts between 1-9 and have been suppressed in accordance with NCHS confidentiality standards.
2020-12-30	2020-02-01	2020-12-26	Connecticut	Under 1 year	Hispanic	0	41	0	0	0	0
2020-12-30	2020-02-01	2020-12-26	Connecticut	0-17 years	Hispanic	0	65		0			One or more data cells have counts between 1-9 and have been suppressed in accordance with NCHS confidentiality standards.
2020-12-30	2020-02-01	2020-12-26	Connecticut	1-4 years	Hispanic	0			0			One or more data cells have counts between 1-9 and have been suppressed in accordance with NCHS confidentiality standards.
2020-12-30	2020-02-01	2020-12-26	Connecticut	5-14 years	Hispanic	0		0	0	0	0	One or more data cells have counts between 1-9 and have been suppressed in accordance with NCHS confidentiality standards.
2020-12-30	2020-02-01	2020-12-26	Connecticut	15-24 years	Hispanic		58		0	0		One or more data cells have counts between 1-9 and have been suppressed in accordance with NCHS confidentiality standards.
2020-12-30	2020-02-01	2020-12-26	Connecticut	18-29 years	Hispanic		106		0	0		One or more data cells have counts between 1-9 and have been suppressed in accordance with NCHS confidentiality standards.
2020-12-30	2020-02-01	2020-12-26	Connecticut	25-34 years	Hispanic		117		0	0		One or more data cells have counts between 1-9 and have been suppressed in accordance with NCHS confidentiality standards.
2020-12-30	2020-02-01	2020-12-26	Connecticut	30-49 years	Hispanic	38	332	14		0	47	One or more data cells have counts between 1-9 and have been suppressed in accordance with NCHS confidentiality standards.
2020-12-30	2020-02-01	2020-12-26	Connecticut	35-44 years	Hispanic	18	168			0	23	One or more data cells have counts between 1-9 and have been suppressed in accordance with NCHS confidentiality standards.
2020-12-30	2020-02-01	2020-12-26	Connecticut	45-54 years	Hispanic	32	255	16		0	40	One or more data cells have counts between 1-9 and have been suppressed in accordance with NCHS confidentiality standards.
2020-12-30	2020-02-01	2020-12-26	Connecticut	50-64 years	Hispanic	111	500	49	33		128	One or more data cells have counts between 1-9 and have been suppressed in accordance with NCHS confidentiality standards.
2020-12-30	2020-02-01	2020-12-26	Connecticut	55-64 years	Hispanic	93	347	39	28		105	One or more data cells have counts between 1-9 and have been suppressed in accordance with NCHS confidentiality standards.
2020-12-30	2020-02-01	2020-12-26	Connecticut	65-74 years	Hispanic	120	398	60	42		139	One or more data cells have counts between 1-9 and have been suppressed in accordance with NCHS confidentiality standards.
2020-12-30	2020-02-01	2020-12-26	Connecticut	75-84 years	Hispanic	131	441	47	30		149	One or more data cells have counts between 1-9 and have been suppressed in accordance with NCHS confidentiality standards.
2020-12-30	2020-02-01	2020-12-26	Connecticut	85 years and over	Hispanic	87	383	32	17	0	102
2020-12-30	2020-02-01	2020-12-26	Connecticut	Under 1 year	Unknown	0		0	0	0	0	One or more data cells have counts between 1-9 and have been suppressed in accordance with NCHS confidentiality standards.
2020-12-30	2020-02-01	2020-12-26	Connecticut	0-17 years	Unknown	0		0	0	0	0	One or more data cells have counts between 1-9 and have been suppressed in accordance with NCHS confidentiality standards.
2020-12-30	2020-02-01	2020-12-26	Connecticut	1-4 years	Unknown	0		0	0	0	0	One or more data cells have counts between 1-9 and have been suppressed in accordance with NCHS confidentiality standards.
2020-12-30	2020-02-01	2020-12-26	Connecticut	5-14 years	Unknown	0	0	0	0	0	0
2020-12-30	2020-02-01	2020-12-26	Connecticut	15-24 years	Unknown	0		0	0	0	0	One or more data cells have counts between 1-9 and have been suppressed in accordance with NCHS confidentiality standards.
2020-12-30	2020-02-01	2020-12-26	Connecticut	18-29 years	Unknown	0		0	0	0	0	One or more data cells have counts between 1-9 and have been suppressed in accordance with NCHS confidentiality standards.
2020-12-30	2020-02-01	2020-12-26	Connecticut	25-34 years	Unknown	0		0	0	0	0	One or more data cells have counts between 1-9 and have been suppressed in accordance with NCHS confidentiality standards.
2020-12-30	2020-02-01	2020-12-26	Connecticut	30-49 years	Unknown	0		0	0	0	0	One or more data cells have counts between 1-9 and have been suppressed in accordance with NCHS confidentiality standards.
2020-12-30	2020-02-01	2020-12-26	Connecticut	35-44 years	Unknown	0		0	0	0	0	One or more data cells have counts between 1-9 and have been suppressed in accordance with NCHS confidentiality standards.
2020-12-30	2020-02-01	2020-12-26	Connecticut	45-54 years	Unknown				0	0		One or more data cells have counts between 1-9 and have been suppressed in accordance with NCHS confidentiality standards.
2020-12-30	2020-02-01	2020-12-26	Connecticut	50-64 years	Unknown		11		0	0		One or more data cells have counts between 1-9 and have been suppressed in accordance with NCHS confidentiality standards.
2020-12-30	2020-02-01	2020-12-26	Connecticut	55-64 years	Unknown				0	0		One or more data cells have counts between 1-9 and have been suppressed in accordance with NCHS confidentiality standards.
2020-12-30	2020-02-01	2020-12-26	Connecticut	65-74 years	Unknown		24			0		One or more data cells have counts between 1-9 and have been suppressed in accordance with NCHS confidentiality standards.
2020-12-30	2020-02-01	2020-12-26	Connecticut	75-84 years	Unknown		23			0		One or more data cells have counts between 1-9 and have been suppressed in accordance with NCHS confidentiality standards.
2020-12-30	2020-02-01	2020-12-26	Connecticut	85 years and over	Unknown	14	36	10		0	16	One or more data cells have counts between 1-9 and have been suppressed in accordance with NCHS confidentiality standards.
2020-12-30	2020-02-01	2020-12-26	Delaware	Under 1 year	Non-Hispanic White	0	20	0	0	0	0
2020-12-30	2020-02-01	2020-12-26	Delaware	0-17 years	Non-Hispanic White		34		0	0		One or more data cells have counts between 1-9 and have been suppressed in accordance with NCHS confidentiality standards.
2020-12-30	2020-02-01	2020-12-26	Delaware	1-4 years	Non-Hispanic White				0	0		One or more data cells have counts between 1-9 and have been suppressed in accordance with NCHS confidentiality standards.
2020-12-30	2020-02-01	2020-12-26	Delaware	5-14 years	Non-Hispanic White	0		0	0	0	0	One or more data cells have counts between 1-9 and have been suppressed in accordance with NCHS confidentiality standards.
2020-12-30	2020-02-01	2020-12-26	Delaware	15-24 years	Non-Hispanic White		32			0		One or more data cells have counts between 1-9 and have been suppressed in accordance with NCHS confidentiality standards.
2020-12-30	2020-02-01	2020-12-26	Delaware	18-29 years	Non-Hispanic White		62			0		One or more data cells have counts between 1-9 and have been suppressed in accordance with NCHS confidentiality standards.
2020-12-30	2020-02-01	2020-12-26	Delaware	25-34 years	Non-Hispanic White		102			0		One or more data cells have counts between 1-9 and have been suppressed in accordance with NCHS confidentiality standards.
2020-12-30	2020-02-01	2020-12-26	Delaware	30-49 years	Non-Hispanic White		342			0	12	One or more data cells have counts between 1-9 and have been suppressed in accordance with NCHS confidentiality standards.
2020-12-30	2020-02-01	2020-12-26	Delaware	35-44 years	Non-Hispanic White		161			0		One or more data cells have counts between 1-9 and have been suppressed in accordance with NCHS confidentiality standards.
2020-12-30	2020-02-01	2020-12-26	Delaware	45-54 years	Non-Hispanic White	16	294	16		0	24	One or more data cells have counts between 1-9 and have been suppressed in accordance with NCHS confidentiality standards.
2020-12-30	2020-02-01	2020-12-26	Delaware	50-64 years	Non-Hispanic White	49	915	61	31		81	One or more data cells have counts between 1-9 and have been suppressed in accordance with NCHS confidentiality standards.
2020-12-30	2020-02-01	2020-12-26	Delaware	55-64 years	Non-Hispanic White	37	733	48	24		63	One or more data cells have counts between 1-9 and have been suppressed in accordance with NCHS confidentiality standards.
2020-12-30	2020-02-01	2020-12-26	Delaware	65-74 years	Non-Hispanic White	92	1373	105	38		162	One or more data cells have counts between 1-9 and have been suppressed in accordance with NCHS confidentiality standards.
2020-12-30	2020-02-01	2020-12-26	Delaware	75-84 years	Non-Hispanic White	152	1865	144	61		238	One or more data cells have counts between 1-9 and have been suppressed in accordance with NCHS confidentiality standards.
2020-12-30	2020-02-01	2020-12-26	Delaware	85 years and over	Non-Hispanic White	198	2333	145	66		282	One or more data cells have counts between 1-9 and have been suppressed in accordance with NCHS confidentiality standards.
2020-12-30	2020-02-01	2020-12-26	Delaware	Under 1 year	Non-Hispanic Black	0	20	0	0	0	0
2020-12-30	2020-02-01	2020-12-26	Delaware	0-17 years	Non-Hispanic Black	0	41		0	0		One or more data cells have counts between 1-9 and have been suppressed in accordance with NCHS confidentiality standards.
2020-12-30	2020-02-01	2020-12-26	Delaware	1-4 years	Non-Hispanic Black	0		0	0	0	0	One or more data cells have counts between 1-9 and have been suppressed in accordance with NCHS confidentiality standards.
2020-12-30	2020-02-01	2020-12-26	Delaware	5-14 years	Non-Hispanic Black	0			0	0		One or more data cells have counts between 1-9 and have been suppressed in accordance with NCHS confidentiality standards.
2020-12-30	2020-02-01	2020-12-26	Delaware	15-24 years	Non-Hispanic Black		47		0	0		One or more data cells have counts between 1-9 and have been suppressed in accordance with NCHS confidentiality standards.
2020-12-30	2020-02-01	2020-12-26	Delaware	18-29 years	Non-Hispanic Black		67		0	0		One or more data cells have counts between 1-9 and have been suppressed in accordance with NCHS confidentiality standards.
2020-12-30	2020-02-01	2020-12-26	Delaware	25-34 years	Non-Hispanic Black		71			0		One or more data cells have counts between 1-9 and have been suppressed in accordance with NCHS confidentiality standards.
2020-12-30	2020-02-01	2020-12-26	Delaware	30-49 years	Non-Hispanic Black		157				11	One or more data cells have counts between 1-9 and have been suppressed in accordance with NCHS confidentiality standards.
2020-12-30	2020-02-01	2020-12-26	Delaware	35-44 years	Non-Hispanic Black		72					One or more data cells have counts between 1-9 and have been suppressed in accordance with NCHS confidentiality standards.
2020-12-30	2020-02-01	2020-12-26	Delaware	45-54 years	Non-Hispanic Black	13	136			0	18	One or more data cells have counts between 1-9 and have been suppressed in accordance with NCHS confidentiality standards.
2020-12-30	2020-02-01	2020-12-26	Delaware	50-64 years	Non-Hispanic Black	40	375	30	18	0	52
2020-12-30	2020-02-01	2020-12-26	Delaware	55-64 years	Non-Hispanic Black	31	283	23	15	0	39
2020-12-30	2020-02-01	2020-12-26	Delaware	65-74 years	Non-Hispanic Black	39	398	34	17		57	One or more data cells have counts between 1-9 and have been suppressed in accordance with NCHS confidentiality standards.
2020-12-30	2020-02-01	2020-12-26	Delaware	75-84 years	Non-Hispanic Black	43	345	31	18		57	One or more data cells have counts between 1-9 and have been suppressed in accordance with NCHS confidentiality standards.
2020-12-30	2020-02-01	2020-12-26	Delaware	85 years and over	Non-Hispanic Black	38	332	22	11	0	49
2020-12-30	2020-02-01	2020-12-26	Delaware	Under 1 year	Non-Hispanic American Indian or Alaska Native	0	0	0	0	0	0
2020-12-30	2020-02-01	2020-12-26	Delaware	0-17 years	Non-Hispanic American Indian or Alaska Native	0	0	0	0	0	0
2020-12-30	2020-02-01	2020-12-26	Delaware	1-4 years	Non-Hispanic American Indian or Alaska Native	0	0	0	0	0	0
2020-12-30	2020-02-01	2020-12-26	Delaware	5-14 years	Non-Hispanic American Indian or Alaska Native	0	0	0	0	0	0
2020-12-30	2020-02-01	2020-12-26	Delaware	15-24 years	Non-Hispanic American Indian or Alaska Native	0	0	0	0	0	0
2020-12-30	2020-02-01	2020-12-26	Delaware	18-29 years	Non-Hispanic American Indian or Alaska Native	0	0	0	0	0	0
2020-12-30	2020-02-01	2020-12-26	Delaware	25-34 years	Non-Hispanic American Indian or Alaska Native	0	0	0	0	0	0
2020-12-30	2020-02-01	2020-12-26	Delaware	30-49 years	Non-Hispanic American Indian or Alaska Native	0	0	0	0	0	0
2020-12-30	2020-02-01	2020-12-26	Delaware	35-44 years	Non-Hispanic American Indian or Alaska Native	0	0	0	0	0	0
2020-12-30	2020-02-01	2020-12-26	Delaware	45-54 years	Non-Hispanic American Indian or Alaska Native	0	0	0	0	0	0
2020-12-30	2020-02-01	2020-12-26	Delaware	50-64 years	Non-Hispanic American Indian or Alaska Native			0	0	0		One or more data cells have counts between 1-9 and have been suppressed in accordance with NCHS confidentiality standards.
2020-12-30	2020-02-01	2020-12-26	Delaware	55-64 years	Non-Hispanic American Indian or Alaska Native			0	0	0		One or more data cells have counts between 1-9 and have been suppressed in accordance with NCHS confidentiality standards.
2020-12-30	2020-02-01	2020-12-26	Delaware	65-74 years	Non-Hispanic American Indian or Alaska Native	0			0	0		One or more data cells have counts between 1-9 and have been suppressed in accordance with NCHS confidentiality standards.
2020-12-30	2020-02-01	2020-12-26	Delaware	75-84 years	Non-Hispanic American Indian or Alaska Native			0	0	0		One or more data cells have counts between 1-9 and have been suppressed in accordance with NCHS confidentiality standards.
2020-12-30	2020-02-01	2020-12-26	Delaware	85 years and over	Non-Hispanic American Indian or Alaska Native					0		One or more data cells have counts between 1-9 and have been suppressed in accordance with NCHS confidentiality standards.
2020-12-30	2020-02-01	2020-12-26	Delaware	Under 1 year	Non-Hispanic Asian	0	0	0	0	0	0
2020-12-30	2020-02-01	2020-12-26	Delaware	0-17 years	Non-Hispanic Asian	0	0	0	0	0	0
2020-12-30	2020-02-01	2020-12-26	Delaware	1-4 years	Non-Hispanic Asian	0	0	0	0	0	0
2020-12-30	2020-02-01	2020-12-26	Delaware	5-14 years	Non-Hispanic Asian	0	0	0	0	0	0
2020-12-30	2020-02-01	2020-12-26	Delaware	15-24 years	Non-Hispanic Asian	0	0	0	0	0	0
2020-12-30	2020-02-01	2020-12-26	Delaware	18-29 years	Non-Hispanic Asian	0		0	0	0	0	One or more data cells have counts between 1-9 and have been suppressed in accordance with NCHS confidentiality standards.
2020-12-30	2020-02-01	2020-12-26	Delaware	25-34 years	Non-Hispanic Asian	0		0	0	0	0	One or more data cells have counts between 1-9 and have been suppressed in accordance with NCHS confidentiality standards.
2020-12-30	2020-02-01	2020-12-26	Delaware	30-49 years	Non-Hispanic Asian	0		0	0	0	0	One or more data cells have counts between 1-9 and have been suppressed in accordance with NCHS confidentiality standards.
2020-12-30	2020-02-01	2020-12-26	Delaware	35-44 years	Non-Hispanic Asian	0		0	0	0	0	One or more data cells have counts between 1-9 and have been suppressed in accordance with NCHS confidentiality standards.
2020-12-30	2020-02-01	2020-12-26	Delaware	45-54 years	Non-Hispanic Asian	0		0	0	0	0	One or more data cells have counts between 1-9 and have been suppressed in accordance with NCHS confidentiality standards.
2020-12-30	2020-02-01	2020-12-26	Delaware	50-64 years	Non-Hispanic Asian		16		0	0		One or more data cells have counts between 1-9 and have been suppressed in accordance with NCHS confidentiality standards.
2020-12-30	2020-02-01	2020-12-26	Delaware	55-64 years	Non-Hispanic Asian		11		0	0		One or more data cells have counts between 1-9 and have been suppressed in accordance with NCHS confidentiality standards.
2020-12-30	2020-02-01	2020-12-26	Delaware	65-74 years	Non-Hispanic Asian	0	16		0	0		One or more data cells have counts between 1-9 and have been suppressed in accordance with NCHS confidentiality standards.
2020-12-30	2020-02-01	2020-12-26	Delaware	75-84 years	Non-Hispanic Asian		32		0	0		One or more data cells have counts between 1-9 and have been suppressed in accordance with NCHS confidentiality standards.
2020-12-30	2020-02-01	2020-12-26	Delaware	85 years and over	Non-Hispanic Asian		24			0		One or more data cells have counts between 1-9 and have been suppressed in accordance with NCHS confidentiality standards.
2020-12-30	2020-02-01	2020-12-26	Delaware	Under 1 year	Non-Hispanic Native Hawaiian or Other Pacific Islander	0		0	0	0	0	One or more data cells have counts between 1-9 and have been suppressed in accordance with NCHS confidentiality standards.
2020-12-30	2020-02-01	2020-12-26	Delaware	0-17 years	Non-Hispanic Native Hawaiian or Other Pacific Islander	0		0	0	0	0	One or more data cells have counts between 1-9 and have been suppressed in accordance with NCHS confidentiality standards.
2020-12-30	2020-02-01	2020-12-26	Delaware	1-4 years	Non-Hispanic Native Hawaiian or Other Pacific Islander	0	0	0	0	0	0
2020-12-30	2020-02-01	2020-12-26	Delaware	5-14 years	Non-Hispanic Native Hawaiian or Other Pacific Islander	0	0	0	0	0	0
2020-12-30	2020-02-01	2020-12-26	Delaware	15-24 years	Non-Hispanic Native Hawaiian or Other Pacific Islander	0	0	0	0	0	0
2020-12-30	2020-02-01	2020-12-26	Delaware	18-29 years	Non-Hispanic Native Hawaiian or Other Pacific Islander	0	0	0	0	0	0
2020-12-30	2020-02-01	2020-12-26	Delaware	25-34 years	Non-Hispanic Native Hawaiian or Other Pacific Islander	0	0	0	0	0	0
2020-12-30	2020-02-01	2020-12-26	Delaware	30-49 years	Non-Hispanic Native Hawaiian or Other Pacific Islander	0	0	0	0	0	0
2020-12-30	2020-02-01	2020-12-26	Delaware	35-44 years	Non-Hispanic Native Hawaiian or Other Pacific Islander	0	0	0	0	0	0
2020-12-30	2020-02-01	2020-12-26	Delaware	45-54 years	Non-Hispanic Native Hawaiian or Other Pacific Islander	0	0	0	0	0	0
2020-12-30	2020-02-01	2020-12-26	Delaware	50-64 years	Non-Hispanic Native Hawaiian or Other Pacific Islander	0	0	0	0	0	0
2020-12-30	2020-02-01	2020-12-26	Delaware	55-64 years	Non-Hispanic Native Hawaiian or Other Pacific Islander	0	0	0	0	0	0
2020-12-30	2020-02-01	2020-12-26	Delaware	65-74 years	Non-Hispanic Native Hawaiian or Other Pacific Islander	0	0	0	0	0	0
2020-12-30	2020-02-01	2020-12-26	Delaware	75-84 years	Non-Hispanic Native Hawaiian or Other Pacific Islander	0	0	0	0	0	0
2020-12-30	2020-02-01	2020-12-26	Delaware	85 years and over	Non-Hispanic Native Hawaiian or Other Pacific Islander	0	0	0	0	0	0
2020-12-30	2020-02-01	2020-12-26	Delaware	Under 1 year	Non-Hispanic More than one race	0		0	0	0	0	One or more data cells have counts between 1-9 and have been suppressed in accordance with NCHS confidentiality standards.
2020-12-30	2020-02-01	2020-12-26	Delaware	0-17 years	Non-Hispanic More than one race	0		0	0	0	0	One or more data cells have counts between 1-9 and have been suppressed in accordance with NCHS confidentiality standards.
2020-12-30	2020-02-01	2020-12-26	Delaware	1-4 years	Non-Hispanic More than one race	0	0	0	0	0	0
2020-12-30	2020-02-01	2020-12-26	Delaware	5-14 years	Non-Hispanic More than one race	0	0	0	0	0	0
2020-12-30	2020-02-01	2020-12-26	Delaware	15-24 years	Non-Hispanic More than one race	0		0	0	0	0	One or more data cells have counts between 1-9 and have been suppressed in accordance with NCHS confidentiality standards.
2020-12-30	2020-02-01	2020-12-26	Delaware	18-29 years	Non-Hispanic More than one race	0		0	0	0	0	One or more data cells have counts between 1-9 and have been suppressed in accordance with NCHS confidentiality standards.
2020-12-30	2020-02-01	2020-12-26	Delaware	25-34 years	Non-Hispanic More than one race	0		0	0	0	0	One or more data cells have counts between 1-9 and have been suppressed in accordance with NCHS confidentiality standards.
2020-12-30	2020-02-01	2020-12-26	Delaware	30-49 years	Non-Hispanic More than one race	0		0	0	0	0	One or more data cells have counts between 1-9 and have been suppressed in accordance with NCHS confidentiality standards.
2020-12-30	2020-02-01	2020-12-26	Delaware	35-44 years	Non-Hispanic More than one race	0	0	0	0	0	0
2020-12-30	2020-02-01	2020-12-26	Delaware	45-54 years	Non-Hispanic More than one race	0		0	0	0	0	One or more data cells have counts between 1-9 and have been suppressed in accordance with NCHS confidentiality standards.
2020-12-30	2020-02-01	2020-12-26	Delaware	50-64 years	Non-Hispanic More than one race					0		One or more data cells have counts between 1-9 and have been suppressed in accordance with NCHS confidentiality standards.
2020-12-30	2020-02-01	2020-12-26	Delaware	55-64 years	Non-Hispanic More than one race					0		One or more data cells have counts between 1-9 and have been suppressed in accordance with NCHS confidentiality standards.
2020-12-30	2020-02-01	2020-12-26	Delaware	65-74 years	Non-Hispanic More than one race	0			0	0		One or more data cells have counts between 1-9 and have been suppressed in accordance with NCHS confidentiality standards.
2020-12-30	2020-02-01	2020-12-26	Delaware	75-84 years	Non-Hispanic More than one race	0		0	0	0	0	One or more data cells have counts between 1-9 and have been suppressed in accordance with NCHS confidentiality standards.
2020-12-30	2020-02-01	2020-12-26	Delaware	85 years and over	Non-Hispanic More than one race			0	0	0		One or more data cells have counts between 1-9 and have been suppressed in accordance with NCHS confidentiality standards.
2020-12-30	2020-02-01	2020-12-26	Delaware	Under 1 year	Hispanic	0		0	0	0	0	One or more data cells have counts between 1-9 and have been suppressed in accordance with NCHS confidentiality standards.
2020-12-30	2020-02-01	2020-12-26	Delaware	0-17 years	Hispanic	0		0	0	0	0	One or more data cells have counts between 1-9 and have been suppressed in accordance with NCHS confidentiality standards.
2020-12-30	2020-02-01	2020-12-26	Delaware	1-4 years	Hispanic	0	0	0	0	0	0
2020-12-30	2020-02-01	2020-12-26	Delaware	5-14 years	Hispanic	0		0	0	0	0	One or more data cells have counts between 1-9 and have been suppressed in accordance with NCHS confidentiality standards.
2020-12-30	2020-02-01	2020-12-26	Delaware	15-24 years	Hispanic		13	0	0	0		One or more data cells have counts between 1-9 and have been suppressed in accordance with NCHS confidentiality standards.
2020-12-30	2020-02-01	2020-12-26	Delaware	18-29 years	Hispanic		18	0	0	0		One or more data cells have counts between 1-9 and have been suppressed in accordance with NCHS confidentiality standards.
2020-12-30	2020-02-01	2020-12-26	Delaware	25-34 years	Hispanic		17			0		One or more data cells have counts between 1-9 and have been suppressed in accordance with NCHS confidentiality standards.
2020-12-30	2020-02-01	2020-12-26	Delaware	30-49 years	Hispanic		44			0		One or more data cells have counts between 1-9 and have been suppressed in accordance with NCHS confidentiality standards.
2020-12-30	2020-02-01	2020-12-26	Delaware	35-44 years	Hispanic		25			0		One or more data cells have counts between 1-9 and have been suppressed in accordance with NCHS confidentiality standards.
2020-12-30	2020-02-01	2020-12-26	Delaware	45-54 years	Hispanic		24			0		One or more data cells have counts between 1-9 and have been suppressed in accordance with NCHS confidentiality standards.
2020-12-30	2020-02-01	2020-12-26	Delaware	50-64 years	Hispanic		45			0	12	One or more data cells have counts between 1-9 and have been suppressed in accordance with NCHS confidentiality standards.
2020-12-30	2020-02-01	2020-12-26	Delaware	55-64 years	Hispanic		30			0	11	One or more data cells have counts between 1-9 and have been suppressed in accordance with NCHS confidentiality standards.
2020-12-30	2020-02-01	2020-12-26	Delaware	65-74 years	Hispanic	10	43			0	13	One or more data cells have counts between 1-9 and have been suppressed in accordance with NCHS confidentiality standards.
2020-12-30	2020-02-01	2020-12-26	Delaware	75-84 years	Hispanic		37			0		One or more data cells have counts between 1-9 and have been suppressed in accordance with NCHS confidentiality standards.
2020-12-30	2020-02-01	2020-12-26	Delaware	85 years and over	Hispanic		43			0		One or more data cells have counts between 1-9 and have been suppressed in accordance with NCHS confidentiality standards.
2020-12-30	2020-02-01	2020-12-26	Delaware	Under 1 year	Unknown	0	0	0	0	0	0
2020-12-30	2020-02-01	2020-12-26	Delaware	0-17 years	Unknown	0	0	0	0	0	0
2020-12-30	2020-02-01	2020-12-26	Delaware	1-4 years	Unknown	0	0	0	0	0	0
2020-12-30	2020-02-01	2020-12-26	Delaware	5-14 years	Unknown	0	0	0	0	0	0
2020-12-30	2020-02-01	2020-12-26	Delaware	15-24 years	Unknown	0	0	0	0	0	0
2020-12-30	2020-02-01	2020-12-26	Delaware	18-29 years	Unknown	0	0	0	0	0	0
2020-12-30	2020-02-01	2020-12-26	Delaware	25-34 years	Unknown	0	0	0	0	0	0
2020-12-30	2020-02-01	2020-12-26	Delaware	30-49 years	Unknown	0	0	0	0	0	0
2020-12-30	2020-02-01	2020-12-26	Delaware	35-44 years	Unknown	0	0	0	0	0	0
2020-12-30	2020-02-01	2020-12-26	Delaware	45-54 years	Unknown	0	0	0	0	0	0
2020-12-30	2020-02-01	2020-12-26	Delaware	50-64 years	Unknown	0	0	0	0	0	0
2020-12-30	2020-02-01	2020-12-26	Delaware	55-64 years	Unknown	0	0	0	0	0	0
2020-12-30	2020-02-01	2020-12-26	Delaware	65-74 years	Unknown	0	0	0	0	0	0
2020-12-30	2020-02-01	2020-12-26	Delaware	75-84 years	Unknown	0	0	0	0	0	0
2020-12-30	2020-02-01	2020-12-26	Delaware	85 years and over	Unknown	0	0	0	0	0	0
2020-12-30	2020-02-01	2020-12-26	District of Columbia	Under 1 year	Non-Hispanic White	0	10	0	0	0	0
2020-12-30	2020-02-01	2020-12-26	District of Columbia	0-17 years	Non-Hispanic White	0	19		0			One or more data cells have counts between 1-9 and have been suppressed in accordance with NCHS confidentiality standards.
2020-12-30	2020-02-01	2020-12-26	District of Columbia	1-4 years	Non-Hispanic White	0			0	0		One or more data cells have counts between 1-9 and have been suppressed in accordance with NCHS confidentiality standards.
2020-12-30	2020-02-01	2020-12-26	District of Columbia	5-14 years	Non-Hispanic White	0		0	0			One or more data cells have counts between 1-9 and have been suppressed in accordance with NCHS confidentiality standards.
2020-12-30	2020-02-01	2020-12-26	District of Columbia	15-24 years	Non-Hispanic White	0	12		0	0		One or more data cells have counts between 1-9 and have been suppressed in accordance with NCHS confidentiality standards.
2020-12-30	2020-02-01	2020-12-26	District of Columbia	18-29 years	Non-Hispanic White	0	20		0	0		One or more data cells have counts between 1-9 and have been suppressed in accordance with NCHS confidentiality standards.
2020-12-30	2020-02-01	2020-12-26	District of Columbia	25-34 years	Non-Hispanic White	0	29		0	0		One or more data cells have counts between 1-9 and have been suppressed in accordance with NCHS confidentiality standards.
2020-12-30	2020-02-01	2020-12-26	District of Columbia	30-49 years	Non-Hispanic White		94			0		One or more data cells have counts between 1-9 and have been suppressed in accordance with NCHS confidentiality standards.
2020-12-30	2020-02-01	2020-12-26	District of Columbia	35-44 years	Non-Hispanic White		50			0		One or more data cells have counts between 1-9 and have been suppressed in accordance with NCHS confidentiality standards.
2020-12-30	2020-02-01	2020-12-26	District of Columbia	45-54 years	Non-Hispanic White		80			0		One or more data cells have counts between 1-9 and have been suppressed in accordance with NCHS confidentiality standards.
2020-12-30	2020-02-01	2020-12-26	District of Columbia	50-64 years	Non-Hispanic White	15	213	23	13	0	25
2020-12-30	2020-02-01	2020-12-26	District of Columbia	55-64 years	Non-Hispanic White	11	158	16		0	18	One or more data cells have counts between 1-9 and have been suppressed in accordance with NCHS confidentiality standards.
2020-12-30	2020-02-01	2020-12-26	District of Columbia	65-74 years	Non-Hispanic White	18	286	40	15		44	One or more data cells have counts between 1-9 and have been suppressed in accordance with NCHS confidentiality standards.
2020-12-30	2020-02-01	2020-12-26	District of Columbia	75-84 years	Non-Hispanic White	28	322	53	27	0	54
2020-12-30	2020-02-01	2020-12-26	District of Columbia	85 years and over	Non-Hispanic White	46	407	57	42		62	One or more data cells have counts between 1-9 and have been suppressed in accordance with NCHS confidentiality standards.
2020-12-30	2020-02-01	2020-12-26	District of Columbia	Under 1 year	Non-Hispanic Black	0	55	0	0			One or more data cells have counts between 1-9 and have been suppressed in accordance with NCHS confidentiality standards.
2020-12-30	2020-02-01	2020-12-26	District of Columbia	0-17 years	Non-Hispanic Black	0	93		0			One or more data cells have counts between 1-9 and have been suppressed in accordance with NCHS confidentiality standards.
2020-12-30	2020-02-01	2020-12-26	District of Columbia	1-4 years	Non-Hispanic Black	0	12	0	0	0	0
2020-12-30	2020-02-01	2020-12-26	District of Columbia	5-14 years	Non-Hispanic Black	0	17		0	0		One or more data cells have counts between 1-9 and have been suppressed in accordance with NCHS confidentiality standards.
2020-12-30	2020-02-01	2020-12-26	District of Columbia	15-24 years	Non-Hispanic Black		79			0		One or more data cells have counts between 1-9 and have been suppressed in accordance with NCHS confidentiality standards.
2020-12-30	2020-02-01	2020-12-26	District of Columbia	18-29 years	Non-Hispanic Black		140			0		One or more data cells have counts between 1-9 and have been suppressed in accordance with NCHS confidentiality standards.
2020-12-30	2020-02-01	2020-12-26	District of Columbia	25-34 years	Non-Hispanic Black		160			0		One or more data cells have counts between 1-9 and have been suppressed in accordance with NCHS confidentiality standards.
2020-12-30	2020-02-01	2020-12-26	District of Columbia	30-49 years	Non-Hispanic Black	29	427	42	28		45	One or more data cells have counts between 1-9 and have been suppressed in accordance with NCHS confidentiality standards.
2020-12-30	2020-02-01	2020-12-26	District of Columbia	35-44 years	Non-Hispanic Black	12	208	17	12		18	One or more data cells have counts between 1-9 and have been suppressed in accordance with NCHS confidentiality standards.
2020-12-30	2020-02-01	2020-12-26	District of Columbia	45-54 years	Non-Hispanic Black	46	354	57	45		59	One or more data cells have counts between 1-9 and have been suppressed in accordance with NCHS confidentiality standards.
2020-12-30	2020-02-01	2020-12-26	District of Columbia	50-64 years	Non-Hispanic Black	152	1172	198	140		211	One or more data cells have counts between 1-9 and have been suppressed in accordance with NCHS confidentiality standards.
2020-12-30	2020-02-01	2020-12-26	District of Columbia	55-64 years	Non-Hispanic Black	122	947	162	110		175	One or more data cells have counts between 1-9 and have been suppressed in accordance with NCHS confidentiality standards.
2020-12-30	2020-02-01	2020-12-26	District of Columbia	65-74 years	Non-Hispanic Black	179	1035	236	169		248	One or more data cells have counts between 1-9 and have been suppressed in accordance with NCHS confidentiality standards.
2020-12-30	2020-02-01	2020-12-26	District of Columbia	75-84 years	Non-Hispanic Black	135	778	177	128	0	184
2020-12-30	2020-02-01	2020-12-26	District of Columbia	85 years and over	Non-Hispanic Black	114	833	156	111	0	159
2020-12-30	2020-02-01	2020-12-26	District of Columbia	Under 1 year	Non-Hispanic American Indian or Alaska Native	0	0	0	0	0	0
2020-12-30	2020-02-01	2020-12-26	District of Columbia	0-17 years	Non-Hispanic American Indian or Alaska Native	0	0	0	0	0	0
2020-12-30	2020-02-01	2020-12-26	District of Columbia	1-4 years	Non-Hispanic American Indian or Alaska Native	0	0	0	0	0	0
2020-12-30	2020-02-01	2020-12-26	District of Columbia	5-14 years	Non-Hispanic American Indian or Alaska Native	0	0	0	0	0	0
2020-12-30	2020-02-01	2020-12-26	District of Columbia	15-24 years	Non-Hispanic American Indian or Alaska Native	0	0	0	0	0	0
2020-12-30	2020-02-01	2020-12-26	District of Columbia	18-29 years	Non-Hispanic American Indian or Alaska Native	0	0	0	0	0	0
2020-12-30	2020-02-01	2020-12-26	District of Columbia	25-34 years	Non-Hispanic American Indian or Alaska Native	0		0	0	0	0	One or more data cells have counts between 1-9 and have been suppressed in accordance with NCHS confidentiality standards.
2020-12-30	2020-02-01	2020-12-26	District of Columbia	30-49 years	Non-Hispanic American Indian or Alaska Native	0		0	0	0	0	One or more data cells have counts between 1-9 and have been suppressed in accordance with NCHS confidentiality standards.
2020-12-30	2020-02-01	2020-12-26	District of Columbia	35-44 years	Non-Hispanic American Indian or Alaska Native	0	0	0	0	0	0
2020-12-30	2020-02-01	2020-12-26	District of Columbia	45-54 years	Non-Hispanic American Indian or Alaska Native	0	0	0	0	0	0
2020-12-30	2020-02-01	2020-12-26	District of Columbia	50-64 years	Non-Hispanic American Indian or Alaska Native					0		One or more data cells have counts between 1-9 and have been suppressed in accordance with NCHS confidentiality standards.
2020-12-30	2020-02-01	2020-12-26	District of Columbia	55-64 years	Non-Hispanic American Indian or Alaska Native					0		One or more data cells have counts between 1-9 and have been suppressed in accordance with NCHS confidentiality standards.
2020-12-30	2020-02-01	2020-12-26	District of Columbia	65-74 years	Non-Hispanic American Indian or Alaska Native	0		0	0	0	0	One or more data cells have counts between 1-9 and have been suppressed in accordance with NCHS confidentiality standards.
2020-12-30	2020-02-01	2020-12-26	District of Columbia	75-84 years	Non-Hispanic American Indian or Alaska Native	0			0	0		One or more data cells have counts between 1-9 and have been suppressed in accordance with NCHS confidentiality standards.
2020-12-30	2020-02-01	2020-12-26	District of Columbia	85 years and over	Non-Hispanic American Indian or Alaska Native	0		0	0	0	0	One or more data cells have counts between 1-9 and have been suppressed in accordance with NCHS confidentiality standards.
2020-12-30	2020-02-01	2020-12-26	District of Columbia	Under 1 year	Non-Hispanic Asian	0		0	0	0	0	One or more data cells have counts between 1-9 and have been suppressed in accordance with NCHS confidentiality standards.
2020-12-30	2020-02-01	2020-12-26	District of Columbia	0-17 years	Non-Hispanic Asian	0		0	0	0	0	One or more data cells have counts between 1-9 and have been suppressed in accordance with NCHS confidentiality standards.
2020-12-30	2020-02-01	2020-12-26	District of Columbia	1-4 years	Non-Hispanic Asian	0		0	0	0	0	One or more data cells have counts between 1-9 and have been suppressed in accordance with NCHS confidentiality standards.
2020-12-30	2020-02-01	2020-12-26	District of Columbia	5-14 years	Non-Hispanic Asian	0		0	0	0	0	One or more data cells have counts between 1-9 and have been suppressed in accordance with NCHS confidentiality standards.
2020-12-30	2020-02-01	2020-12-26	District of Columbia	15-24 years	Non-Hispanic Asian	0		0	0	0	0	One or more data cells have counts between 1-9 and have been suppressed in accordance with NCHS confidentiality standards.
2020-12-30	2020-02-01	2020-12-26	District of Columbia	18-29 years	Non-Hispanic Asian					0		One or more data cells have counts between 1-9 and have been suppressed in accordance with NCHS confidentiality standards.
2020-12-30	2020-02-01	2020-12-26	District of Columbia	25-34 years	Non-Hispanic Asian					0		One or more data cells have counts between 1-9 and have been suppressed in accordance with NCHS confidentiality standards.
2020-12-30	2020-02-01	2020-12-26	District of Columbia	30-49 years	Non-Hispanic Asian		14			0		One or more data cells have counts between 1-9 and have been suppressed in accordance with NCHS confidentiality standards.
2020-12-30	2020-02-01	2020-12-26	District of Columbia	35-44 years	Non-Hispanic Asian	0		0	0	0	0	One or more data cells have counts between 1-9 and have been suppressed in accordance with NCHS confidentiality standards.
2020-12-30	2020-02-01	2020-12-26	District of Columbia	45-54 years	Non-Hispanic Asian					0		One or more data cells have counts between 1-9 and have been suppressed in accordance with NCHS confidentiality standards.
2020-12-30	2020-02-01	2020-12-26	District of Columbia	50-64 years	Non-Hispanic Asian		19			0		One or more data cells have counts between 1-9 and have been suppressed in accordance with NCHS confidentiality standards.
2020-12-30	2020-02-01	2020-12-26	District of Columbia	55-64 years	Non-Hispanic Asian		16			0		One or more data cells have counts between 1-9 and have been suppressed in accordance with NCHS confidentiality standards.
2020-12-30	2020-02-01	2020-12-26	District of Columbia	65-74 years	Non-Hispanic Asian		45	10		0	10	One or more data cells have counts between 1-9 and have been suppressed in accordance with NCHS confidentiality standards.
2020-12-30	2020-02-01	2020-12-26	District of Columbia	75-84 years	Non-Hispanic Asian		22			0		One or more data cells have counts between 1-9 and have been suppressed in accordance with NCHS confidentiality standards.
2020-12-30	2020-02-01	2020-12-26	District of Columbia	85 years and over	Non-Hispanic Asian		20			0		One or more data cells have counts between 1-9 and have been suppressed in accordance with NCHS confidentiality standards.
2020-12-30	2020-02-01	2020-12-26	District of Columbia	Under 1 year	Non-Hispanic Native Hawaiian or Other Pacific Islander	0	0	0	0	0	0
2020-12-30	2020-02-01	2020-12-26	District of Columbia	0-17 years	Non-Hispanic Native Hawaiian or Other Pacific Islander	0	0	0	0	0	0
2020-12-30	2020-02-01	2020-12-26	District of Columbia	1-4 years	Non-Hispanic Native Hawaiian or Other Pacific Islander	0	0	0	0	0	0
2020-12-30	2020-02-01	2020-12-26	District of Columbia	5-14 years	Non-Hispanic Native Hawaiian or Other Pacific Islander	0	0	0	0	0	0
2020-12-30	2020-02-01	2020-12-26	District of Columbia	15-24 years	Non-Hispanic Native Hawaiian or Other Pacific Islander	0	0	0	0	0	0
2020-12-30	2020-02-01	2020-12-26	District of Columbia	18-29 years	Non-Hispanic Native Hawaiian or Other Pacific Islander	0	0	0	0	0	0
2020-12-30	2020-02-01	2020-12-26	District of Columbia	25-34 years	Non-Hispanic Native Hawaiian or Other Pacific Islander	0		0	0	0	0	One or more data cells have counts between 1-9 and have been suppressed in accordance with NCHS confidentiality standards.
2020-12-30	2020-02-01	2020-12-26	District of Columbia	30-49 years	Non-Hispanic Native Hawaiian or Other Pacific Islander	0		0	0	0	0	One or more data cells have counts between 1-9 and have been suppressed in accordance with NCHS confidentiality standards.
2020-12-30	2020-02-01	2020-12-26	District of Columbia	35-44 years	Non-Hispanic Native Hawaiian or Other Pacific Islander	0	0	0	0	0	0
2020-12-30	2020-02-01	2020-12-26	District of Columbia	45-54 years	Non-Hispanic Native Hawaiian or Other Pacific Islander	0	0	0	0	0	0
2020-12-30	2020-02-01	2020-12-26	District of Columbia	50-64 years	Non-Hispanic Native Hawaiian or Other Pacific Islander	0		0	0	0	0	One or more data cells have counts between 1-9 and have been suppressed in accordance with NCHS confidentiality standards.
2020-12-30	2020-02-01	2020-12-26	District of Columbia	55-64 years	Non-Hispanic Native Hawaiian or Other Pacific Islander	0		0	0	0	0	One or more data cells have counts between 1-9 and have been suppressed in accordance with NCHS confidentiality standards.
2020-12-30	2020-02-01	2020-12-26	District of Columbia	65-74 years	Non-Hispanic Native Hawaiian or Other Pacific Islander	0	0	0	0	0	0
2020-12-30	2020-02-01	2020-12-26	District of Columbia	75-84 years	Non-Hispanic Native Hawaiian or Other Pacific Islander	0	0	0	0	0	0
2020-12-30	2020-02-01	2020-12-26	District of Columbia	85 years and over	Non-Hispanic Native Hawaiian or Other Pacific Islander	0		0	0	0	0	One or more data cells have counts between 1-9 and have been suppressed in accordance with NCHS confidentiality standards.
2020-12-30	2020-02-01	2020-12-26	District of Columbia	Under 1 year	Non-Hispanic More than one race	0		0	0	0	0	One or more data cells have counts between 1-9 and have been suppressed in accordance with NCHS confidentiality standards.
2020-12-30	2020-02-01	2020-12-26	District of Columbia	0-17 years	Non-Hispanic More than one race	0		0	0	0	0	One or more data cells have counts between 1-9 and have been suppressed in accordance with NCHS confidentiality standards.
2020-12-30	2020-02-01	2020-12-26	District of Columbia	1-4 years	Non-Hispanic More than one race	0		0	0	0	0	One or more data cells have counts between 1-9 and have been suppressed in accordance with NCHS confidentiality standards.
2020-12-30	2020-02-01	2020-12-26	District of Columbia	5-14 years	Non-Hispanic More than one race	0		0	0	0	0	One or more data cells have counts between 1-9 and have been suppressed in accordance with NCHS confidentiality standards.
2020-12-30	2020-02-01	2020-12-26	District of Columbia	15-24 years	Non-Hispanic More than one race	0		0	0	0	0	One or more data cells have counts between 1-9 and have been suppressed in accordance with NCHS confidentiality standards.
2020-12-30	2020-02-01	2020-12-26	District of Columbia	18-29 years	Non-Hispanic More than one race	0		0	0	0	0	One or more data cells have counts between 1-9 and have been suppressed in accordance with NCHS confidentiality standards.
2020-12-30	2020-02-01	2020-12-26	District of Columbia	25-34 years	Non-Hispanic More than one race	0		0	0	0	0	One or more data cells have counts between 1-9 and have been suppressed in accordance with NCHS confidentiality standards.
2020-12-30	2020-02-01	2020-12-26	District of Columbia	30-49 years	Non-Hispanic More than one race	0			0	0		One or more data cells have counts between 1-9 and have been suppressed in accordance with NCHS confidentiality standards.
2020-12-30	2020-02-01	2020-12-26	District of Columbia	35-44 years	Non-Hispanic More than one race	0		0	0	0	0	One or more data cells have counts between 1-9 and have been suppressed in accordance with NCHS confidentiality standards.
2020-12-30	2020-02-01	2020-12-26	District of Columbia	45-54 years	Non-Hispanic More than one race	0			0	0		One or more data cells have counts between 1-9 and have been suppressed in accordance with NCHS confidentiality standards.
2020-12-30	2020-02-01	2020-12-26	District of Columbia	50-64 years	Non-Hispanic More than one race					0		One or more data cells have counts between 1-9 and have been suppressed in accordance with NCHS confidentiality standards.
2020-12-30	2020-02-01	2020-12-26	District of Columbia	55-64 years	Non-Hispanic More than one race					0		One or more data cells have counts between 1-9 and have been suppressed in accordance with NCHS confidentiality standards.
2020-12-30	2020-02-01	2020-12-26	District of Columbia	65-74 years	Non-Hispanic More than one race					0		One or more data cells have counts between 1-9 and have been suppressed in accordance with NCHS confidentiality standards.
2020-12-30	2020-02-01	2020-12-26	District of Columbia	75-84 years	Non-Hispanic More than one race					0		One or more data cells have counts between 1-9 and have been suppressed in accordance with NCHS confidentiality standards.
2020-12-30	2020-02-01	2020-12-26	District of Columbia	85 years and over	Non-Hispanic More than one race					0		One or more data cells have counts between 1-9 and have been suppressed in accordance with NCHS confidentiality standards.
2020-12-30	2020-02-01	2020-12-26	District of Columbia	Under 1 year	Hispanic		16	0	0	0		One or more data cells have counts between 1-9 and have been suppressed in accordance with NCHS confidentiality standards.
2020-12-30	2020-02-01	2020-12-26	District of Columbia	0-17 years	Hispanic		27		0			One or more data cells have counts between 1-9 and have been suppressed in accordance with NCHS confidentiality standards.
2020-12-30	2020-02-01	2020-12-26	District of Columbia	1-4 years	Hispanic	0		0	0			One or more data cells have counts between 1-9 and have been suppressed in accordance with NCHS confidentiality standards.
2020-12-30	2020-02-01	2020-12-26	District of Columbia	5-14 years	Hispanic	0			0	0		One or more data cells have counts between 1-9 and have been suppressed in accordance with NCHS confidentiality standards.
2020-12-30	2020-02-01	2020-12-26	District of Columbia	15-24 years	Hispanic	0	16		0	0		One or more data cells have counts between 1-9 and have been suppressed in accordance with NCHS confidentiality standards.
2020-12-30	2020-02-01	2020-12-26	District of Columbia	18-29 years	Hispanic		21			0		One or more data cells have counts between 1-9 and have been suppressed in accordance with NCHS confidentiality standards.
2020-12-30	2020-02-01	2020-12-26	District of Columbia	25-34 years	Hispanic		25			0		One or more data cells have counts between 1-9 and have been suppressed in accordance with NCHS confidentiality standards.
2020-12-30	2020-02-01	2020-12-26	District of Columbia	30-49 years	Hispanic	35	85	36	32	0	39
2020-12-30	2020-02-01	2020-12-26	District of Columbia	35-44 years	Hispanic	16	37	16	14	0	18
2020-12-30	2020-02-01	2020-12-26	District of Columbia	45-54 years	Hispanic	29	64	30	27	0	32
2020-12-30	2020-02-01	2020-12-26	District of Columbia	50-64 years	Hispanic	41	101	41	38	0	44
2020-12-30	2020-02-01	2020-12-26	District of Columbia	55-64 years	Hispanic	28	68	28	26	0	30
2020-12-30	2020-02-01	2020-12-26	District of Columbia	65-74 years	Hispanic	34	64	33	32	0	35
2020-12-30	2020-02-01	2020-12-26	District of Columbia	75-84 years	Hispanic	13	44	14	12	0	15
2020-12-30	2020-02-01	2020-12-26	District of Columbia	85 years and over	Hispanic		44	13		0	13	One or more data cells have counts between 1-9 and have been suppressed in accordance with NCHS confidentiality standards.
2020-12-30	2020-02-01	2020-12-26	District of Columbia	Under 1 year	Unknown	0	0	0	0	0	0
2020-12-30	2020-02-01	2020-12-26	District of Columbia	0-17 years	Unknown	0	0	0	0	0	0
2020-12-30	2020-02-01	2020-12-26	District of Columbia	1-4 years	Unknown	0	0	0	0	0	0
2020-12-30	2020-02-01	2020-12-26	District of Columbia	5-14 years	Unknown	0	0	0	0	0	0
2020-12-30	2020-02-01	2020-12-26	District of Columbia	15-24 years	Unknown	0	0	0	0	0	0
2020-12-30	2020-02-01	2020-12-26	District of Columbia	18-29 years	Unknown	0	0	0	0	0	0
2020-12-30	2020-02-01	2020-12-26	District of Columbia	25-34 years	Unknown	0	0	0	0	0	0
2020-12-30	2020-02-01	2020-12-26	District of Columbia	30-49 years	Unknown	0	0	0	0	0	0
2020-12-30	2020-02-01	2020-12-26	District of Columbia	35-44 years	Unknown	0	0	0	0	0	0
2020-12-30	2020-02-01	2020-12-26	District of Columbia	45-54 years	Unknown	0	0	0	0	0	0
2020-12-30	2020-02-01	2020-12-26	District of Columbia	50-64 years	Unknown	0	0	0	0	0	0
2020-12-30	2020-02-01	2020-12-26	District of Columbia	55-64 years	Unknown	0	0	0	0	0	0
2020-12-30	2020-02-01	2020-12-26	District of Columbia	65-74 years	Unknown	0	0	0	0	0	0
2020-12-30	2020-02-01	2020-12-26	District of Columbia	75-84 years	Unknown	0	0	0	0	0	0
2020-12-30	2020-02-01	2020-12-26	District of Columbia	85 years and over	Unknown	0	0	0	0	0	0
2020-12-30	2020-02-01	2020-12-26	Florida	Under 1 year	Non-Hispanic White	0	338		0			One or more data cells have counts between 1-9 and have been suppressed in accordance with NCHS confidentiality standards.
2020-12-30	2020-02-01	2020-12-26	Florida	0-17 years	Non-Hispanic White		666	11			14	One or more data cells have counts between 1-9 and have been suppressed in accordance with NCHS confidentiality standards.
2020-12-30	2020-02-01	2020-12-26	Florida	1-4 years	Non-Hispanic White	0	82		0	0		One or more data cells have counts between 1-9 and have been suppressed in accordance with NCHS confidentiality standards.
2020-12-30	2020-02-01	2020-12-26	Florida	5-14 years	Non-Hispanic White		131		0			One or more data cells have counts between 1-9 and have been suppressed in accordance with NCHS confidentiality standards.
2020-12-30	2020-02-01	2020-12-26	Florida	15-24 years	Non-Hispanic White		875	13			17	One or more data cells have counts between 1-9 and have been suppressed in accordance with NCHS confidentiality standards.
2020-12-30	2020-02-01	2020-12-26	Florida	18-29 years	Non-Hispanic White	15	1793	45			55	One or more data cells have counts between 1-9 and have been suppressed in accordance with NCHS confidentiality standards.
2020-12-30	2020-02-01	2020-12-26	Florida	25-34 years	Non-Hispanic White	23	2485	77	15		90	One or more data cells have counts between 1-9 and have been suppressed in accordance with NCHS confidentiality standards.
2020-12-30	2020-02-01	2020-12-26	Florida	30-49 years	Non-Hispanic White	137	7634	291	73	21	376
2020-12-30	2020-02-01	2020-12-26	Florida	35-44 years	Non-Hispanic White	51	3648	131	27		161	One or more data cells have counts between 1-9 and have been suppressed in accordance with NCHS confidentiality standards.
2020-12-30	2020-02-01	2020-12-26	Florida	45-54 years	Non-Hispanic White	209	6634	371	104	18	493
2020-12-30	2020-02-01	2020-12-26	Florida	50-64 years	Non-Hispanic White	928	21714	1585	484	44	2071
2020-12-30	2020-02-01	2020-12-26	Florida	55-64 years	Non-Hispanic White	792	17614	1331	415	36	1743
2020-12-30	2020-02-01	2020-12-26	Florida	65-74 years	Non-Hispanic White	1990	29362	2889	1080	59	3856
2020-12-30	2020-02-01	2020-12-26	Florida	75-84 years	Non-Hispanic White	3290	40221	4112	1693	54	5761
2020-12-30	2020-02-01	2020-12-26	Florida	85 years and over	Non-Hispanic White	3825	50668	4268	1782	42	6347
2020-12-30	2020-02-01	2020-12-26	Florida	Under 1 year	Non-Hispanic Black	0	414		0	0		One or more data cells have counts between 1-9 and have been suppressed in accordance with NCHS confidentiality standards.
2020-12-30	2020-02-01	2020-12-26	Florida	0-17 years	Non-Hispanic Black		670	14			18	One or more data cells have counts between 1-9 and have been suppressed in accordance with NCHS confidentiality standards.
2020-12-30	2020-02-01	2020-12-26	Florida	1-4 years	Non-Hispanic Black	0	78		0			One or more data cells have counts between 1-9 and have been suppressed in accordance with NCHS confidentiality standards.
2020-12-30	2020-02-01	2020-12-26	Florida	5-14 years	Non-Hispanic Black		93			0		One or more data cells have counts between 1-9 and have been suppressed in accordance with NCHS confidentiality standards.
2020-12-30	2020-02-01	2020-12-26	Florida	15-24 years	Non-Hispanic Black	17	623	16		0	28	One or more data cells have counts between 1-9 and have been suppressed in accordance with NCHS confidentiality standards.
2020-12-30	2020-02-01	2020-12-26	Florida	18-29 years	Non-Hispanic Black	23	1015	31			46	One or more data cells have counts between 1-9 and have been suppressed in accordance with NCHS confidentiality standards.
2020-12-30	2020-02-01	2020-12-26	Florida	25-34 years	Non-Hispanic Black	42	1041	55	22		77	One or more data cells have counts between 1-9 and have been suppressed in accordance with NCHS confidentiality standards.
2020-12-30	2020-02-01	2020-12-26	Florida	30-49 years	Non-Hispanic Black	276	2999	268	139	10	414
2020-12-30	2020-02-01	2020-12-26	Florida	35-44 years	Non-Hispanic Black	134	1447	124	61		201	One or more data cells have counts between 1-9 and have been suppressed in accordance with NCHS confidentiality standards.
2020-12-30	2020-02-01	2020-12-26	Florida	45-54 years	Non-Hispanic Black	265	2373	244	140		375	One or more data cells have counts between 1-9 and have been suppressed in accordance with NCHS confidentiality standards.
2020-12-30	2020-02-01	2020-12-26	Florida	50-64 years	Non-Hispanic Black	806	6216	767	433	15	1154
2020-12-30	2020-02-01	2020-12-26	Florida	55-64 years	Non-Hispanic Black	649	4831	628	353	12	936
2020-12-30	2020-02-01	2020-12-26	Florida	65-74 years	Non-Hispanic Black	1008	6168	886	542	13	1365
2020-12-30	2020-02-01	2020-12-26	Florida	75-84 years	Non-Hispanic Black	898	5501	811	515	11	1201
2020-12-30	2020-02-01	2020-12-26	Florida	85 years and over	Non-Hispanic Black	627	4931	603	342		896	One or more data cells have counts between 1-9 and have been suppressed in accordance with NCHS confidentiality standards.
2020-12-30	2020-02-01	2020-12-26	Florida	Under 1 year	Non-Hispanic American Indian or Alaska Native	0		0	0	0	0	One or more data cells have counts between 1-9 and have been suppressed in accordance with NCHS confidentiality standards.
2020-12-30	2020-02-01	2020-12-26	Florida	0-17 years	Non-Hispanic American Indian or Alaska Native	0		0	0	0	0	One or more data cells have counts between 1-9 and have been suppressed in accordance with NCHS confidentiality standards.
2020-12-30	2020-02-01	2020-12-26	Florida	1-4 years	Non-Hispanic American Indian or Alaska Native	0	0	0	0	0	0
2020-12-30	2020-02-01	2020-12-26	Florida	5-14 years	Non-Hispanic American Indian or Alaska Native	0		0	0	0	0	One or more data cells have counts between 1-9 and have been suppressed in accordance with NCHS confidentiality standards.
2020-12-30	2020-02-01	2020-12-26	Florida	15-24 years	Non-Hispanic American Indian or Alaska Native			0	0	0		One or more data cells have counts between 1-9 and have been suppressed in accordance with NCHS confidentiality standards.
2020-12-30	2020-02-01	2020-12-26	Florida	18-29 years	Non-Hispanic American Indian or Alaska Native		14	0	0	0		One or more data cells have counts between 1-9 and have been suppressed in accordance with NCHS confidentiality standards.
2020-12-30	2020-02-01	2020-12-26	Florida	25-34 years	Non-Hispanic American Indian or Alaska Native		14	0	0	0		One or more data cells have counts between 1-9 and have been suppressed in accordance with NCHS confidentiality standards.
2020-12-30	2020-02-01	2020-12-26	Florida	30-49 years	Non-Hispanic American Indian or Alaska Native		26					One or more data cells have counts between 1-9 and have been suppressed in accordance with NCHS confidentiality standards.
2020-12-30	2020-02-01	2020-12-26	Florida	35-44 years	Non-Hispanic American Indian or Alaska Native	0		0	0	0	0	One or more data cells have counts between 1-9 and have been suppressed in accordance with NCHS confidentiality standards.
2020-12-30	2020-02-01	2020-12-26	Florida	45-54 years	Non-Hispanic American Indian or Alaska Native		32					One or more data cells have counts between 1-9 and have been suppressed in accordance with NCHS confidentiality standards.
2020-12-30	2020-02-01	2020-12-26	Florida	50-64 years	Non-Hispanic American Indian or Alaska Native		64			0	13	One or more data cells have counts between 1-9 and have been suppressed in accordance with NCHS confidentiality standards.
2020-12-30	2020-02-01	2020-12-26	Florida	55-64 years	Non-Hispanic American Indian or Alaska Native		42			0		One or more data cells have counts between 1-9 and have been suppressed in accordance with NCHS confidentiality standards.
2020-12-30	2020-02-01	2020-12-26	Florida	65-74 years	Non-Hispanic American Indian or Alaska Native		67			0	11	One or more data cells have counts between 1-9 and have been suppressed in accordance with NCHS confidentiality standards.
2020-12-30	2020-02-01	2020-12-26	Florida	75-84 years	Non-Hispanic American Indian or Alaska Native		37			0		One or more data cells have counts between 1-9 and have been suppressed in accordance with NCHS confidentiality standards.
2020-12-30	2020-02-01	2020-12-26	Florida	85 years and over	Non-Hispanic American Indian or Alaska Native		35			0		One or more data cells have counts between 1-9 and have been suppressed in accordance with NCHS confidentiality standards.
2020-12-30	2020-02-01	2020-12-26	Florida	Under 1 year	Non-Hispanic Asian	0	10	0	0			One or more data cells have counts between 1-9 and have been suppressed in accordance with NCHS confidentiality standards.
2020-12-30	2020-02-01	2020-12-26	Florida	0-17 years	Non-Hispanic Asian	0	20	0	0			One or more data cells have counts between 1-9 and have been suppressed in accordance with NCHS confidentiality standards.
2020-12-30	2020-02-01	2020-12-26	Florida	1-4 years	Non-Hispanic Asian	0		0	0	0	0	One or more data cells have counts between 1-9 and have been suppressed in accordance with NCHS confidentiality standards.
2020-12-30	2020-02-01	2020-12-26	Florida	5-14 years	Non-Hispanic Asian	0		0	0	0	0	One or more data cells have counts between 1-9 and have been suppressed in accordance with NCHS confidentiality standards.
2020-12-30	2020-02-01	2020-12-26	Florida	15-24 years	Non-Hispanic Asian		25		0	0		One or more data cells have counts between 1-9 and have been suppressed in accordance with NCHS confidentiality standards.
2020-12-30	2020-02-01	2020-12-26	Florida	18-29 years	Non-Hispanic Asian		48					One or more data cells have counts between 1-9 and have been suppressed in accordance with NCHS confidentiality standards.
2020-12-30	2020-02-01	2020-12-26	Florida	25-34 years	Non-Hispanic Asian		47					One or more data cells have counts between 1-9 and have been suppressed in accordance with NCHS confidentiality standards.
2020-12-30	2020-02-01	2020-12-26	Florida	30-49 years	Non-Hispanic Asian	14	170				18	One or more data cells have counts between 1-9 and have been suppressed in accordance with NCHS confidentiality standards.
2020-12-30	2020-02-01	2020-12-26	Florida	35-44 years	Non-Hispanic Asian		78				10	One or more data cells have counts between 1-9 and have been suppressed in accordance with NCHS confidentiality standards.
2020-12-30	2020-02-01	2020-12-26	Florida	45-54 years	Non-Hispanic Asian	20	179	13			27	One or more data cells have counts between 1-9 and have been suppressed in accordance with NCHS confidentiality standards.
2020-12-30	2020-02-01	2020-12-26	Florida	50-64 years	Non-Hispanic Asian	47	438	41	19		72	One or more data cells have counts between 1-9 and have been suppressed in accordance with NCHS confidentiality standards.
2020-12-30	2020-02-01	2020-12-26	Florida	55-64 years	Non-Hispanic Asian	34	331	32	15		53	One or more data cells have counts between 1-9 and have been suppressed in accordance with NCHS confidentiality standards.
2020-12-30	2020-02-01	2020-12-26	Florida	65-74 years	Non-Hispanic Asian	68	505	65	35		98	One or more data cells have counts between 1-9 and have been suppressed in accordance with NCHS confidentiality standards.
2020-12-30	2020-02-01	2020-12-26	Florida	75-84 years	Non-Hispanic Asian	74	685	68	35	0	107
2020-12-30	2020-02-01	2020-12-26	Florida	85 years and over	Non-Hispanic Asian	66	602	68	31	0	103
2020-12-30	2020-02-01	2020-12-26	Florida	Under 1 year	Non-Hispanic Native Hawaiian or Other Pacific Islander	0	0	0	0	0	0
2020-12-30	2020-02-01	2020-12-26	Florida	0-17 years	Non-Hispanic Native Hawaiian or Other Pacific Islander	0		0	0	0	0	One or more data cells have counts between 1-9 and have been suppressed in accordance with NCHS confidentiality standards.
2020-12-30	2020-02-01	2020-12-26	Florida	1-4 years	Non-Hispanic Native Hawaiian or Other Pacific Islander	0		0	0	0	0	One or more data cells have counts between 1-9 and have been suppressed in accordance with NCHS confidentiality standards.
2020-12-30	2020-02-01	2020-12-26	Florida	5-14 years	Non-Hispanic Native Hawaiian or Other Pacific Islander	0	0	0	0	0	0
2020-12-30	2020-02-01	2020-12-26	Florida	15-24 years	Non-Hispanic Native Hawaiian or Other Pacific Islander	0		0	0	0	0	One or more data cells have counts between 1-9 and have been suppressed in accordance with NCHS confidentiality standards.
2020-12-30	2020-02-01	2020-12-26	Florida	18-29 years	Non-Hispanic Native Hawaiian or Other Pacific Islander	0		0	0	0	0	One or more data cells have counts between 1-9 and have been suppressed in accordance with NCHS confidentiality standards.
2020-12-30	2020-02-01	2020-12-26	Florida	25-34 years	Non-Hispanic Native Hawaiian or Other Pacific Islander	0		0	0	0	0	One or more data cells have counts between 1-9 and have been suppressed in accordance with NCHS confidentiality standards.
2020-12-30	2020-02-01	2020-12-26	Florida	30-49 years	Non-Hispanic Native Hawaiian or Other Pacific Islander					0		One or more data cells have counts between 1-9 and have been suppressed in accordance with NCHS confidentiality standards.
2020-12-30	2020-02-01	2020-12-26	Florida	35-44 years	Non-Hispanic Native Hawaiian or Other Pacific Islander					0		One or more data cells have counts between 1-9 and have been suppressed in accordance with NCHS confidentiality standards.
2020-12-30	2020-02-01	2020-12-26	Florida	45-54 years	Non-Hispanic Native Hawaiian or Other Pacific Islander			0	0	0		One or more data cells have counts between 1-9 and have been suppressed in accordance with NCHS confidentiality standards.
2020-12-30	2020-02-01	2020-12-26	Florida	50-64 years	Non-Hispanic Native Hawaiian or Other Pacific Islander		11		0	0		One or more data cells have counts between 1-9 and have been suppressed in accordance with NCHS confidentiality standards.
2020-12-30	2020-02-01	2020-12-26	Florida	55-64 years	Non-Hispanic Native Hawaiian or Other Pacific Islander		10		0	0		One or more data cells have counts between 1-9 and have been suppressed in accordance with NCHS confidentiality standards.
2020-12-30	2020-02-01	2020-12-26	Florida	65-74 years	Non-Hispanic Native Hawaiian or Other Pacific Islander		15			0		One or more data cells have counts between 1-9 and have been suppressed in accordance with NCHS confidentiality standards.
2020-12-30	2020-02-01	2020-12-26	Florida	75-84 years	Non-Hispanic Native Hawaiian or Other Pacific Islander	0	13	0	0	0	0
2020-12-30	2020-02-01	2020-12-26	Florida	85 years and over	Non-Hispanic Native Hawaiian or Other Pacific Islander		10		0	0		One or more data cells have counts between 1-9 and have been suppressed in accordance with NCHS confidentiality standards.
2020-12-30	2020-02-01	2020-12-26	Florida	Under 1 year	Non-Hispanic More than one race	0	35		0	0		One or more data cells have counts between 1-9 and have been suppressed in accordance with NCHS confidentiality standards.
2020-12-30	2020-02-01	2020-12-26	Florida	0-17 years	Non-Hispanic More than one race	0	55		0			One or more data cells have counts between 1-9 and have been suppressed in accordance with NCHS confidentiality standards.
2020-12-30	2020-02-01	2020-12-26	Florida	1-4 years	Non-Hispanic More than one race	0			0	0		One or more data cells have counts between 1-9 and have been suppressed in accordance with NCHS confidentiality standards.
2020-12-30	2020-02-01	2020-12-26	Florida	5-14 years	Non-Hispanic More than one race	0		0	0			One or more data cells have counts between 1-9 and have been suppressed in accordance with NCHS confidentiality standards.
2020-12-30	2020-02-01	2020-12-26	Florida	15-24 years	Non-Hispanic More than one race	0	36	0	0	0	0
2020-12-30	2020-02-01	2020-12-26	Florida	18-29 years	Non-Hispanic More than one race		54			0		One or more data cells have counts between 1-9 and have been suppressed in accordance with NCHS confidentiality standards.
2020-12-30	2020-02-01	2020-12-26	Florida	25-34 years	Non-Hispanic More than one race		51			0		One or more data cells have counts between 1-9 and have been suppressed in accordance with NCHS confidentiality standards.
2020-12-30	2020-02-01	2020-12-26	Florida	30-49 years	Non-Hispanic More than one race		104			0		One or more data cells have counts between 1-9 and have been suppressed in accordance with NCHS confidentiality standards.
2020-12-30	2020-02-01	2020-12-26	Florida	35-44 years	Non-Hispanic More than one race		42			0		One or more data cells have counts between 1-9 and have been suppressed in accordance with NCHS confidentiality standards.
2020-12-30	2020-02-01	2020-12-26	Florida	45-54 years	Non-Hispanic More than one race		71			0		One or more data cells have counts between 1-9 and have been suppressed in accordance with NCHS confidentiality standards.
2020-12-30	2020-02-01	2020-12-26	Florida	50-64 years	Non-Hispanic More than one race	10	145	13		0	19	One or more data cells have counts between 1-9 and have been suppressed in accordance with NCHS confidentiality standards.
2020-12-30	2020-02-01	2020-12-26	Florida	55-64 years	Non-Hispanic More than one race	10	109	10		0	16	One or more data cells have counts between 1-9 and have been suppressed in accordance with NCHS confidentiality standards.
2020-12-30	2020-02-01	2020-12-26	Florida	65-74 years	Non-Hispanic More than one race	10	126	19		0	21	One or more data cells have counts between 1-9 and have been suppressed in accordance with NCHS confidentiality standards.
2020-12-30	2020-02-01	2020-12-26	Florida	75-84 years	Non-Hispanic More than one race	17	142	16	11	0	22
2020-12-30	2020-02-01	2020-12-26	Florida	85 years and over	Non-Hispanic More than one race	13	151			0	15	One or more data cells have counts between 1-9 and have been suppressed in accordance with NCHS confidentiality standards.
2020-12-30	2020-02-01	2020-12-26	Florida	Under 1 year	Hispanic	0	265		0	0		One or more data cells have counts between 1-9 and have been suppressed in accordance with NCHS confidentiality standards.
2020-12-30	2020-02-01	2020-12-26	Florida	0-17 years	Hispanic		468			0	10	One or more data cells have counts between 1-9 and have been suppressed in accordance with NCHS confidentiality standards.
2020-12-30	2020-02-01	2020-12-26	Florida	1-4 years	Hispanic	0	51		0	0		One or more data cells have counts between 1-9 and have been suppressed in accordance with NCHS confidentiality standards.
2020-12-30	2020-02-01	2020-12-26	Florida	5-14 years	Hispanic		84		0	0		One or more data cells have counts between 1-9 and have been suppressed in accordance with NCHS confidentiality standards.
2020-12-30	2020-02-01	2020-12-26	Florida	15-24 years	Hispanic		462	15			20	One or more data cells have counts between 1-9 and have been suppressed in accordance with NCHS confidentiality standards.
2020-12-30	2020-02-01	2020-12-26	Florida	18-29 years	Hispanic	23	791	34	16		44	One or more data cells have counts between 1-9 and have been suppressed in accordance with NCHS confidentiality standards.
2020-12-30	2020-02-01	2020-12-26	Florida	25-34 years	Hispanic	44	846	50	29		67	One or more data cells have counts between 1-9 and have been suppressed in accordance with NCHS confidentiality standards.
2020-12-30	2020-02-01	2020-12-26	Florida	30-49 years	Hispanic	284	2419	252	182		363	One or more data cells have counts between 1-9 and have been suppressed in accordance with NCHS confidentiality standards.
2020-12-30	2020-02-01	2020-12-26	Florida	35-44 years	Hispanic	131	1167	107	78		163	One or more data cells have counts between 1-9 and have been suppressed in accordance with NCHS confidentiality standards.
2020-12-30	2020-02-01	2020-12-26	Florida	45-54 years	Hispanic	303	1899	281	192		399	One or more data cells have counts between 1-9 and have been suppressed in accordance with NCHS confidentiality standards.
2020-12-30	2020-02-01	2020-12-26	Florida	50-64 years	Hispanic	914	4777	845	610	10	1158
2020-12-30	2020-02-01	2020-12-26	Florida	55-64 years	Hispanic	736	3681	680	504		918	One or more data cells have counts between 1-9 and have been suppressed in accordance with NCHS confidentiality standards.
2020-12-30	2020-02-01	2020-12-26	Florida	65-74 years	Hispanic	1127	5390	1120	817	11	1439
2020-12-30	2020-02-01	2020-12-26	Florida	75-84 years	Hispanic	1467	7932	1546	1068	19	1963
2020-12-30	2020-02-01	2020-12-26	Florida	85 years and over	Hispanic	1378	10329	1562	932	13	2017
2020-12-30	2020-02-01	2020-12-26	Florida	Under 1 year	Unknown	0	0	0	0	0	0
2020-12-30	2020-02-01	2020-12-26	Florida	0-17 years	Unknown	0	0	0	0	0	0
2020-12-30	2020-02-01	2020-12-26	Florida	1-4 years	Unknown	0	0	0	0	0	0
2020-12-30	2020-02-01	2020-12-26	Florida	5-14 years	Unknown	0	0	0	0	0	0
2020-12-30	2020-02-01	2020-12-26	Florida	15-24 years	Unknown	0		0	0	0	0	One or more data cells have counts between 1-9 and have been suppressed in accordance with NCHS confidentiality standards.
2020-12-30	2020-02-01	2020-12-26	Florida	18-29 years	Unknown	0		0	0	0	0	One or more data cells have counts between 1-9 and have been suppressed in accordance with NCHS confidentiality standards.
2020-12-30	2020-02-01	2020-12-26	Florida	25-34 years	Unknown	0		0	0	0	0	One or more data cells have counts between 1-9 and have been suppressed in accordance with NCHS confidentiality standards.
2020-12-30	2020-02-01	2020-12-26	Florida	30-49 years	Unknown	0		0	0	0	0	One or more data cells have counts between 1-9 and have been suppressed in accordance with NCHS confidentiality standards.
2020-12-30	2020-02-01	2020-12-26	Florida	35-44 years	Unknown	0		0	0	0	0	One or more data cells have counts between 1-9 and have been suppressed in accordance with NCHS confidentiality standards.
2020-12-30	2020-02-01	2020-12-26	Florida	45-54 years	Unknown	0		0	0	0	0	One or more data cells have counts between 1-9 and have been suppressed in accordance with NCHS confidentiality standards.
2020-12-30	2020-02-01	2020-12-26	Florida	50-64 years	Unknown	0	28		0	0		One or more data cells have counts between 1-9 and have been suppressed in accordance with NCHS confidentiality standards.
2020-12-30	2020-02-01	2020-12-26	Florida	55-64 years	Unknown	0	24		0	0		One or more data cells have counts between 1-9 and have been suppressed in accordance with NCHS confidentiality standards.
2020-12-30	2020-02-01	2020-12-26	Florida	65-74 years	Unknown		21		0	0		One or more data cells have counts between 1-9 and have been suppressed in accordance with NCHS confidentiality standards.
2020-12-30	2020-02-01	2020-12-26	Florida	75-84 years	Unknown	0			0	0		One or more data cells have counts between 1-9 and have been suppressed in accordance with NCHS confidentiality standards.
2020-12-30	2020-02-01	2020-12-26	Florida	85 years and over	Unknown	0		0	0	0	0	One or more data cells have counts between 1-9 and have been suppressed in accordance with NCHS confidentiality standards.
2020-12-30	2020-02-01	2020-12-26	Georgia	Under 1 year	Non-Hispanic White	0	169		0	0		One or more data cells have counts between 1-9 and have been suppressed in accordance with NCHS confidentiality standards.
2020-12-30	2020-02-01	2020-12-26	Georgia	0-17 years	Non-Hispanic White		341		0			One or more data cells have counts between 1-9 and have been suppressed in accordance with NCHS confidentiality standards.
2020-12-30	2020-02-01	2020-12-26	Georgia	1-4 years	Non-Hispanic White	0	48	0	0			One or more data cells have counts between 1-9 and have been suppressed in accordance with NCHS confidentiality standards.
2020-12-30	2020-02-01	2020-12-26	Georgia	5-14 years	Non-Hispanic White		63		0	0		One or more data cells have counts between 1-9 and have been suppressed in accordance with NCHS confidentiality standards.
2020-12-30	2020-02-01	2020-12-26	Georgia	15-24 years	Non-Hispanic White		428				11	One or more data cells have counts between 1-9 and have been suppressed in accordance with NCHS confidentiality standards.
2020-12-30	2020-02-01	2020-12-26	Georgia	18-29 years	Non-Hispanic White		761	14			17	One or more data cells have counts between 1-9 and have been suppressed in accordance with NCHS confidentiality standards.
2020-12-30	2020-02-01	2020-12-26	Georgia	25-34 years	Non-Hispanic White	13	872	21			29	One or more data cells have counts between 1-9 and have been suppressed in accordance with NCHS confidentiality standards.
2020-12-30	2020-02-01	2020-12-26	Georgia	30-49 years	Non-Hispanic White	89	3127	143	40		200	One or more data cells have counts between 1-9 and have been suppressed in accordance with NCHS confidentiality standards.
2020-12-30	2020-02-01	2020-12-26	Georgia	35-44 years	Non-Hispanic White	32	1442	64	16		83	One or more data cells have counts between 1-9 and have been suppressed in accordance with NCHS confidentiality standards.
2020-12-30	2020-02-01	2020-12-26	Georgia	45-54 years	Non-Hispanic White	130	3108	180	61		256	One or more data cells have counts between 1-9 and have been suppressed in accordance with NCHS confidentiality standards.
2020-12-30	2020-02-01	2020-12-26	Georgia	50-64 years	Non-Hispanic White	552	9572	738	294	19	1015
2020-12-30	2020-02-01	2020-12-26	Georgia	55-64 years	Non-Hispanic White	470	7671	623	254	16	855
2020-12-30	2020-02-01	2020-12-26	Georgia	65-74 years	Non-Hispanic White	1053	11984	1126	555	17	1640
2020-12-30	2020-02-01	2020-12-26	Georgia	75-84 years	Non-Hispanic White	1502	15434	1548	785	21	2286
2020-12-30	2020-02-01	2020-12-26	Georgia	85 years and over	Non-Hispanic White	1359	16275	1264	558		2074	One or more data cells have counts between 1-9 and have been suppressed in accordance with NCHS confidentiality standards.
2020-12-30	2020-02-01	2020-12-26	Georgia	Under 1 year	Non-Hispanic Black	0	301		0	0		One or more data cells have counts between 1-9 and have been suppressed in accordance with NCHS confidentiality standards.
2020-12-30	2020-02-01	2020-12-26	Georgia	0-17 years	Non-Hispanic Black		521		0			One or more data cells have counts between 1-9 and have been suppressed in accordance with NCHS confidentiality standards.
2020-12-30	2020-02-01	2020-12-26	Georgia	1-4 years	Non-Hispanic Black		56	0	0			One or more data cells have counts between 1-9 and have been suppressed in accordance with NCHS confidentiality standards.
2020-12-30	2020-02-01	2020-12-26	Georgia	5-14 years	Non-Hispanic Black		95	0	0			One or more data cells have counts between 1-9 and have been suppressed in accordance with NCHS confidentiality standards.
2020-12-30	2020-02-01	2020-12-26	Georgia	15-24 years	Non-Hispanic Black	14	484			0	17	One or more data cells have counts between 1-9 and have been suppressed in accordance with NCHS confidentiality standards.
2020-12-30	2020-02-01	2020-12-26	Georgia	18-29 years	Non-Hispanic Black	24	855	18		0	35	One or more data cells have counts between 1-9 and have been suppressed in accordance with NCHS confidentiality standards.
2020-12-30	2020-02-01	2020-12-26	Georgia	25-34 years	Non-Hispanic Black	47	971	25			64	One or more data cells have counts between 1-9 and have been suppressed in accordance with NCHS confidentiality standards.
2020-12-30	2020-02-01	2020-12-26	Georgia	30-49 years	Non-Hispanic Black	244	2742	180	94		334	One or more data cells have counts between 1-9 and have been suppressed in accordance with NCHS confidentiality standards.
2020-12-30	2020-02-01	2020-12-26	Georgia	35-44 years	Non-Hispanic Black	106	1278	87	41		153	One or more data cells have counts between 1-9 and have been suppressed in accordance with NCHS confidentiality standards.
2020-12-30	2020-02-01	2020-12-26	Georgia	45-54 years	Non-Hispanic Black	246	2219	207	122		335	One or more data cells have counts between 1-9 and have been suppressed in accordance with NCHS confidentiality standards.
2020-12-30	2020-02-01	2020-12-26	Georgia	50-64 years	Non-Hispanic Black	733	6161	583	332		991	One or more data cells have counts between 1-9 and have been suppressed in accordance with NCHS confidentiality standards.
2020-12-30	2020-02-01	2020-12-26	Georgia	55-64 years	Non-Hispanic Black	589	4875	455	257		792	One or more data cells have counts between 1-9 and have been suppressed in accordance with NCHS confidentiality standards.
2020-12-30	2020-02-01	2020-12-26	Georgia	65-74 years	Non-Hispanic Black	922	6504	731	436		1226	One or more data cells have counts between 1-9 and have been suppressed in accordance with NCHS confidentiality standards.
2020-12-30	2020-02-01	2020-12-26	Georgia	75-84 years	Non-Hispanic Black	757	5158	591	374		979	One or more data cells have counts between 1-9 and have been suppressed in accordance with NCHS confidentiality standards.
2020-12-30	2020-02-01	2020-12-26	Georgia	85 years and over	Non-Hispanic Black	556	4157	430	266		726	One or more data cells have counts between 1-9 and have been suppressed in accordance with NCHS confidentiality standards.
2020-12-30	2020-02-01	2020-12-26	Georgia	Under 1 year	Non-Hispanic American Indian or Alaska Native	0		0	0	0	0	One or more data cells have counts between 1-9 and have been suppressed in accordance with NCHS confidentiality standards.
2020-12-30	2020-02-01	2020-12-26	Georgia	0-17 years	Non-Hispanic American Indian or Alaska Native	0		0	0	0	0	One or more data cells have counts between 1-9 and have been suppressed in accordance with NCHS confidentiality standards.
2020-12-30	2020-02-01	2020-12-26	Georgia	1-4 years	Non-Hispanic American Indian or Alaska Native	0	0	0	0	0	0
2020-12-30	2020-02-01	2020-12-26	Georgia	5-14 years	Non-Hispanic American Indian or Alaska Native	0	0	0	0	0	0
2020-12-30	2020-02-01	2020-12-26	Georgia	15-24 years	Non-Hispanic American Indian or Alaska Native	0	0	0	0	0	0
2020-12-30	2020-02-01	2020-12-26	Georgia	18-29 years	Non-Hispanic American Indian or Alaska Native	0	0	0	0	0	0
2020-12-30	2020-02-01	2020-12-26	Georgia	25-34 years	Non-Hispanic American Indian or Alaska Native	0	0	0	0	0	0
2020-12-30	2020-02-01	2020-12-26	Georgia	30-49 years	Non-Hispanic American Indian or Alaska Native					0		One or more data cells have counts between 1-9 and have been suppressed in accordance with NCHS confidentiality standards.
2020-12-30	2020-02-01	2020-12-26	Georgia	35-44 years	Non-Hispanic American Indian or Alaska Native					0		One or more data cells have counts between 1-9 and have been suppressed in accordance with NCHS confidentiality standards.
2020-12-30	2020-02-01	2020-12-26	Georgia	45-54 years	Non-Hispanic American Indian or Alaska Native	0			0	0		One or more data cells have counts between 1-9 and have been suppressed in accordance with NCHS confidentiality standards.
2020-12-30	2020-02-01	2020-12-26	Georgia	50-64 years	Non-Hispanic American Indian or Alaska Native	0	16		0	0		One or more data cells have counts between 1-9 and have been suppressed in accordance with NCHS confidentiality standards.
2020-12-30	2020-02-01	2020-12-26	Georgia	55-64 years	Non-Hispanic American Indian or Alaska Native	0			0	0		One or more data cells have counts between 1-9 and have been suppressed in accordance with NCHS confidentiality standards.
2020-12-30	2020-02-01	2020-12-26	Georgia	65-74 years	Non-Hispanic American Indian or Alaska Native	0	11		0	0		One or more data cells have counts between 1-9 and have been suppressed in accordance with NCHS confidentiality standards.
2020-12-30	2020-02-01	2020-12-26	Georgia	75-84 years	Non-Hispanic American Indian or Alaska Native		24			0		One or more data cells have counts between 1-9 and have been suppressed in accordance with NCHS confidentiality standards.
2020-12-30	2020-02-01	2020-12-26	Georgia	85 years and over	Non-Hispanic American Indian or Alaska Native					0		One or more data cells have counts between 1-9 and have been suppressed in accordance with NCHS confidentiality standards.
2020-12-30	2020-02-01	2020-12-26	Georgia	Under 1 year	Non-Hispanic Asian		12	0	0	0		One or more data cells have counts between 1-9 and have been suppressed in accordance with NCHS confidentiality standards.
2020-12-30	2020-02-01	2020-12-26	Georgia	0-17 years	Non-Hispanic Asian		23		0	0		One or more data cells have counts between 1-9 and have been suppressed in accordance with NCHS confidentiality standards.
2020-12-30	2020-02-01	2020-12-26	Georgia	1-4 years	Non-Hispanic Asian	0		0	0	0	0	One or more data cells have counts between 1-9 and have been suppressed in accordance with NCHS confidentiality standards.
2020-12-30	2020-02-01	2020-12-26	Georgia	5-14 years	Non-Hispanic Asian	0			0	0		One or more data cells have counts between 1-9 and have been suppressed in accordance with NCHS confidentiality standards.
2020-12-30	2020-02-01	2020-12-26	Georgia	15-24 years	Non-Hispanic Asian	0	16	0	0	0	0
2020-12-30	2020-02-01	2020-12-26	Georgia	18-29 years	Non-Hispanic Asian	0	34		0	0		One or more data cells have counts between 1-9 and have been suppressed in accordance with NCHS confidentiality standards.
2020-12-30	2020-02-01	2020-12-26	Georgia	25-34 years	Non-Hispanic Asian		36			0		One or more data cells have counts between 1-9 and have been suppressed in accordance with NCHS confidentiality standards.
2020-12-30	2020-02-01	2020-12-26	Georgia	30-49 years	Non-Hispanic Asian	13	121			0	15	One or more data cells have counts between 1-9 and have been suppressed in accordance with NCHS confidentiality standards.
2020-12-30	2020-02-01	2020-12-26	Georgia	35-44 years	Non-Hispanic Asian		61			0	10	One or more data cells have counts between 1-9 and have been suppressed in accordance with NCHS confidentiality standards.
2020-12-30	2020-02-01	2020-12-26	Georgia	45-54 years	Non-Hispanic Asian		98			0	10	One or more data cells have counts between 1-9 and have been suppressed in accordance with NCHS confidentiality standards.
2020-12-30	2020-02-01	2020-12-26	Georgia	50-64 years	Non-Hispanic Asian	27	227	22	13	0	36
2020-12-30	2020-02-01	2020-12-26	Georgia	55-64 years	Non-Hispanic Asian	21	171	19	11	0	29
2020-12-30	2020-02-01	2020-12-26	Georgia	65-74 years	Non-Hispanic Asian	46	271	41	29	0	58
2020-12-30	2020-02-01	2020-12-26	Georgia	75-84 years	Non-Hispanic Asian	29	324	35	18	0	46
2020-12-30	2020-02-01	2020-12-26	Georgia	85 years and over	Non-Hispanic Asian	28	301	18	12		35	One or more data cells have counts between 1-9 and have been suppressed in accordance with NCHS confidentiality standards.
2020-12-30	2020-02-01	2020-12-26	Georgia	Under 1 year	Non-Hispanic Native Hawaiian or Other Pacific Islander	0		0	0	0	0	One or more data cells have counts between 1-9 and have been suppressed in accordance with NCHS confidentiality standards.
2020-12-30	2020-02-01	2020-12-26	Georgia	0-17 years	Non-Hispanic Native Hawaiian or Other Pacific Islander	0		0	0	0	0	One or more data cells have counts between 1-9 and have been suppressed in accordance with NCHS confidentiality standards.
2020-12-30	2020-02-01	2020-12-26	Georgia	1-4 years	Non-Hispanic Native Hawaiian or Other Pacific Islander	0	0	0	0	0	0
2020-12-30	2020-02-01	2020-12-26	Georgia	5-14 years	Non-Hispanic Native Hawaiian or Other Pacific Islander	0	0	0	0	0	0
2020-12-30	2020-02-01	2020-12-26	Georgia	15-24 years	Non-Hispanic Native Hawaiian or Other Pacific Islander	0		0	0	0	0	One or more data cells have counts between 1-9 and have been suppressed in accordance with NCHS confidentiality standards.
2020-12-30	2020-02-01	2020-12-26	Georgia	18-29 years	Non-Hispanic Native Hawaiian or Other Pacific Islander	0		0	0	0	0	One or more data cells have counts between 1-9 and have been suppressed in accordance with NCHS confidentiality standards.
2020-12-30	2020-02-01	2020-12-26	Georgia	25-34 years	Non-Hispanic Native Hawaiian or Other Pacific Islander	0	0	0	0	0	0
2020-12-30	2020-02-01	2020-12-26	Georgia	30-49 years	Non-Hispanic Native Hawaiian or Other Pacific Islander	0		0	0	0	0	One or more data cells have counts between 1-9 and have been suppressed in accordance with NCHS confidentiality standards.
2020-12-30	2020-02-01	2020-12-26	Georgia	35-44 years	Non-Hispanic Native Hawaiian or Other Pacific Islander	0		0	0	0	0	One or more data cells have counts between 1-9 and have been suppressed in accordance with NCHS confidentiality standards.
2020-12-30	2020-02-01	2020-12-26	Georgia	45-54 years	Non-Hispanic Native Hawaiian or Other Pacific Islander	0		0	0	0	0	One or more data cells have counts between 1-9 and have been suppressed in accordance with NCHS confidentiality standards.
2020-12-30	2020-02-01	2020-12-26	Georgia	50-64 years	Non-Hispanic Native Hawaiian or Other Pacific Islander	0			0	0		One or more data cells have counts between 1-9 and have been suppressed in accordance with NCHS confidentiality standards.
2020-12-30	2020-02-01	2020-12-26	Georgia	55-64 years	Non-Hispanic Native Hawaiian or Other Pacific Islander	0			0	0		One or more data cells have counts between 1-9 and have been suppressed in accordance with NCHS confidentiality standards.
2020-12-30	2020-02-01	2020-12-26	Georgia	65-74 years	Non-Hispanic Native Hawaiian or Other Pacific Islander			0	0	0		One or more data cells have counts between 1-9 and have been suppressed in accordance with NCHS confidentiality standards.
2020-12-30	2020-02-01	2020-12-26	Georgia	75-84 years	Non-Hispanic Native Hawaiian or Other Pacific Islander					0		One or more data cells have counts between 1-9 and have been suppressed in accordance with NCHS confidentiality standards.
2020-12-30	2020-02-01	2020-12-26	Georgia	85 years and over	Non-Hispanic Native Hawaiian or Other Pacific Islander			0	0	0		One or more data cells have counts between 1-9 and have been suppressed in accordance with NCHS confidentiality standards.
2020-12-30	2020-02-01	2020-12-26	Georgia	Under 1 year	Non-Hispanic More than one race	0		0	0	0	0	One or more data cells have counts between 1-9 and have been suppressed in accordance with NCHS confidentiality standards.
2020-12-30	2020-02-01	2020-12-26	Georgia	0-17 years	Non-Hispanic More than one race	0	11	0	0	0	0
2020-12-30	2020-02-01	2020-12-26	Georgia	1-4 years	Non-Hispanic More than one race	0		0	0	0	0	One or more data cells have counts between 1-9 and have been suppressed in accordance with NCHS confidentiality standards.
2020-12-30	2020-02-01	2020-12-26	Georgia	5-14 years	Non-Hispanic More than one race	0	0	0	0	0	0
2020-12-30	2020-02-01	2020-12-26	Georgia	15-24 years	Non-Hispanic More than one race	0		0	0	0	0	One or more data cells have counts between 1-9 and have been suppressed in accordance with NCHS confidentiality standards.
2020-12-30	2020-02-01	2020-12-26	Georgia	18-29 years	Non-Hispanic More than one race	0		0	0	0	0	One or more data cells have counts between 1-9 and have been suppressed in accordance with NCHS confidentiality standards.
2020-12-30	2020-02-01	2020-12-26	Georgia	25-34 years	Non-Hispanic More than one race	0		0	0	0	0	One or more data cells have counts between 1-9 and have been suppressed in accordance with NCHS confidentiality standards.
2020-12-30	2020-02-01	2020-12-26	Georgia	30-49 years	Non-Hispanic More than one race		20	0	0	0		One or more data cells have counts between 1-9 and have been suppressed in accordance with NCHS confidentiality standards.
2020-12-30	2020-02-01	2020-12-26	Georgia	35-44 years	Non-Hispanic More than one race	0		0	0	0	0	One or more data cells have counts between 1-9 and have been suppressed in accordance with NCHS confidentiality standards.
2020-12-30	2020-02-01	2020-12-26	Georgia	45-54 years	Non-Hispanic More than one race		14		0	0		One or more data cells have counts between 1-9 and have been suppressed in accordance with NCHS confidentiality standards.
2020-12-30	2020-02-01	2020-12-26	Georgia	50-64 years	Non-Hispanic More than one race		23		0	0		One or more data cells have counts between 1-9 and have been suppressed in accordance with NCHS confidentiality standards.
2020-12-30	2020-02-01	2020-12-26	Georgia	55-64 years	Non-Hispanic More than one race		15	0	0	0		One or more data cells have counts between 1-9 and have been suppressed in accordance with NCHS confidentiality standards.
2020-12-30	2020-02-01	2020-12-26	Georgia	65-74 years	Non-Hispanic More than one race		22			0		One or more data cells have counts between 1-9 and have been suppressed in accordance with NCHS confidentiality standards.
2020-12-30	2020-02-01	2020-12-26	Georgia	75-84 years	Non-Hispanic More than one race		17			0		One or more data cells have counts between 1-9 and have been suppressed in accordance with NCHS confidentiality standards.
2020-12-30	2020-02-01	2020-12-26	Georgia	85 years and over	Non-Hispanic More than one race	0	11	0	0	0	0
2020-12-30	2020-02-01	2020-12-26	Georgia	Under 1 year	Hispanic		58	0	0	0		One or more data cells have counts between 1-9 and have been suppressed in accordance with NCHS confidentiality standards.
2020-12-30	2020-02-01	2020-12-26	Georgia	0-17 years	Hispanic		120		0	0		One or more data cells have counts between 1-9 and have been suppressed in accordance with NCHS confidentiality standards.
2020-12-30	2020-02-01	2020-12-26	Georgia	1-4 years	Hispanic	0	17	0	0	0	0
2020-12-30	2020-02-01	2020-12-26	Georgia	5-14 years	Hispanic		30		0	0		One or more data cells have counts between 1-9 and have been suppressed in accordance with NCHS confidentiality standards.
2020-12-30	2020-02-01	2020-12-26	Georgia	15-24 years	Hispanic		101				10	One or more data cells have counts between 1-9 and have been suppressed in accordance with NCHS confidentiality standards.
2020-12-30	2020-02-01	2020-12-26	Georgia	18-29 years	Hispanic	10	139				16	One or more data cells have counts between 1-9 and have been suppressed in accordance with NCHS confidentiality standards.
2020-12-30	2020-02-01	2020-12-26	Georgia	25-34 years	Hispanic	17	126	11		0	19	One or more data cells have counts between 1-9 and have been suppressed in accordance with NCHS confidentiality standards.
2020-12-30	2020-02-01	2020-12-26	Georgia	30-49 years	Hispanic	98	460	59	51		107	One or more data cells have counts between 1-9 and have been suppressed in accordance with NCHS confidentiality standards.
2020-12-30	2020-02-01	2020-12-26	Georgia	35-44 years	Hispanic	38	222	21	16		44	One or more data cells have counts between 1-9 and have been suppressed in accordance with NCHS confidentiality standards.
2020-12-30	2020-02-01	2020-12-26	Georgia	45-54 years	Hispanic	105	354	66	61	0	110
2020-12-30	2020-02-01	2020-12-26	Georgia	50-64 years	Hispanic	185	584	108	96		199	One or more data cells have counts between 1-9 and have been suppressed in accordance with NCHS confidentiality standards.
2020-12-30	2020-02-01	2020-12-26	Georgia	55-64 years	Hispanic	129	395	72	63		140	One or more data cells have counts between 1-9 and have been suppressed in accordance with NCHS confidentiality standards.
2020-12-30	2020-02-01	2020-12-26	Georgia	65-74 years	Hispanic	131	396	84	69	0	146
2020-12-30	2020-02-01	2020-12-26	Georgia	75-84 years	Hispanic	75	388	66	47		95	One or more data cells have counts between 1-9 and have been suppressed in accordance with NCHS confidentiality standards.
2020-12-30	2020-02-01	2020-12-26	Georgia	85 years and over	Hispanic	43	292	39	23	0	59
2020-12-30	2020-02-01	2020-12-26	Georgia	Under 1 year	Unknown	0	0	0	0	0	0
2020-12-30	2020-02-01	2020-12-26	Georgia	0-17 years	Unknown	0	0	0	0	0	0
2020-12-30	2020-02-01	2020-12-26	Georgia	1-4 years	Unknown	0	0	0	0	0	0
2020-12-30	2020-02-01	2020-12-26	Georgia	5-14 years	Unknown	0	0	0	0	0	0
2020-12-30	2020-02-01	2020-12-26	Georgia	15-24 years	Unknown	0	0	0	0	0	0
2020-12-30	2020-02-01	2020-12-26	Georgia	18-29 years	Unknown	0	0	0	0	0	0
2020-12-30	2020-02-01	2020-12-26	Georgia	25-34 years	Unknown	0	0	0	0	0	0
2020-12-30	2020-02-01	2020-12-26	Georgia	30-49 years	Unknown	0	0	0	0	0	0
2020-12-30	2020-02-01	2020-12-26	Georgia	35-44 years	Unknown	0	0	0	0	0	0
2020-12-30	2020-02-01	2020-12-26	Georgia	45-54 years	Unknown	0	0	0	0	0	0
2020-12-30	2020-02-01	2020-12-26	Georgia	50-64 years	Unknown	0		0	0	0	0	One or more data cells have counts between 1-9 and have been suppressed in accordance with NCHS confidentiality standards.
2020-12-30	2020-02-01	2020-12-26	Georgia	55-64 years	Unknown	0		0	0	0	0	One or more data cells have counts between 1-9 and have been suppressed in accordance with NCHS confidentiality standards.
2020-12-30	2020-02-01	2020-12-26	Georgia	65-74 years	Unknown	0		0	0	0	0	One or more data cells have counts between 1-9 and have been suppressed in accordance with NCHS confidentiality standards.
2020-12-30	2020-02-01	2020-12-26	Georgia	75-84 years	Unknown	0	0	0	0	0	0
2020-12-30	2020-02-01	2020-12-26	Georgia	85 years and over	Unknown			0	0	0		One or more data cells have counts between 1-9 and have been suppressed in accordance with NCHS confidentiality standards.
2020-12-30	2020-02-01	2020-12-26	Hawaii	Under 1 year	Non-Hispanic White	0		0	0	0	0	One or more data cells have counts between 1-9 and have been suppressed in accordance with NCHS confidentiality standards.
2020-12-30	2020-02-01	2020-12-26	Hawaii	0-17 years	Non-Hispanic White	0			0	0		One or more data cells have counts between 1-9 and have been suppressed in accordance with NCHS confidentiality standards.
2020-12-30	2020-02-01	2020-12-26	Hawaii	1-4 years	Non-Hispanic White	0	0	0	0	0	0
2020-12-30	2020-02-01	2020-12-26	Hawaii	5-14 years	Non-Hispanic White	0			0	0		One or more data cells have counts between 1-9 and have been suppressed in accordance with NCHS confidentiality standards.
2020-12-30	2020-02-01	2020-12-26	Hawaii	15-24 years	Non-Hispanic White	0	16	0	0	0	0
2020-12-30	2020-02-01	2020-12-26	Hawaii	18-29 years	Non-Hispanic White	0	25	0	0	0	0
2020-12-30	2020-02-01	2020-12-26	Hawaii	25-34 years	Non-Hispanic White	0	30		0	0		One or more data cells have counts between 1-9 and have been suppressed in accordance with NCHS confidentiality standards.
2020-12-30	2020-02-01	2020-12-26	Hawaii	30-49 years	Non-Hispanic White	0	120		0	0		One or more data cells have counts between 1-9 and have been suppressed in accordance with NCHS confidentiality standards.
2020-12-30	2020-02-01	2020-12-26	Hawaii	35-44 years	Non-Hispanic White	0	69	0	0	0	0
2020-12-30	2020-02-01	2020-12-26	Hawaii	45-54 years	Non-Hispanic White	0	103		0	0		One or more data cells have counts between 1-9 and have been suppressed in accordance with NCHS confidentiality standards.
2020-12-30	2020-02-01	2020-12-26	Hawaii	50-64 years	Non-Hispanic White		382	15	0	0	17	One or more data cells have counts between 1-9 and have been suppressed in accordance with NCHS confidentiality standards.
2020-12-30	2020-02-01	2020-12-26	Hawaii	55-64 years	Non-Hispanic White		310	12	0	0	14	One or more data cells have counts between 1-9 and have been suppressed in accordance with NCHS confidentiality standards.
2020-12-30	2020-02-01	2020-12-26	Hawaii	65-74 years	Non-Hispanic White		628	30			39	One or more data cells have counts between 1-9 and have been suppressed in accordance with NCHS confidentiality standards.
2020-12-30	2020-02-01	2020-12-26	Hawaii	75-84 years	Non-Hispanic White	10	604	26			35	One or more data cells have counts between 1-9 and have been suppressed in accordance with NCHS confidentiality standards.
2020-12-30	2020-02-01	2020-12-26	Hawaii	85 years and over	Non-Hispanic White		714	42			47	One or more data cells have counts between 1-9 and have been suppressed in accordance with NCHS confidentiality standards.
2020-12-30	2020-02-01	2020-12-26	Hawaii	Under 1 year	Non-Hispanic Black	0		0	0	0	0	One or more data cells have counts between 1-9 and have been suppressed in accordance with NCHS confidentiality standards.
2020-12-30	2020-02-01	2020-12-26	Hawaii	0-17 years	Non-Hispanic Black	0		0	0	0	0	One or more data cells have counts between 1-9 and have been suppressed in accordance with NCHS confidentiality standards.
2020-12-30	2020-02-01	2020-12-26	Hawaii	1-4 years	Non-Hispanic Black	0	0	0	0	0	0
2020-12-30	2020-02-01	2020-12-26	Hawaii	5-14 years	Non-Hispanic Black	0		0	0	0	0	One or more data cells have counts between 1-9 and have been suppressed in accordance with NCHS confidentiality standards.
2020-12-30	2020-02-01	2020-12-26	Hawaii	15-24 years	Non-Hispanic Black	0		0	0	0	0	One or more data cells have counts between 1-9 and have been suppressed in accordance with NCHS confidentiality standards.
2020-12-30	2020-02-01	2020-12-26	Hawaii	18-29 years	Non-Hispanic Black	0		0	0	0	0	One or more data cells have counts between 1-9 and have been suppressed in accordance with NCHS confidentiality standards.
2020-12-30	2020-02-01	2020-12-26	Hawaii	25-34 years	Non-Hispanic Black	0		0	0	0	0	One or more data cells have counts between 1-9 and have been suppressed in accordance with NCHS confidentiality standards.
2020-12-30	2020-02-01	2020-12-26	Hawaii	30-49 years	Non-Hispanic Black	0	10	0	0	0	0
2020-12-30	2020-02-01	2020-12-26	Hawaii	35-44 years	Non-Hispanic Black	0		0	0	0	0	One or more data cells have counts between 1-9 and have been suppressed in accordance with NCHS confidentiality standards.
2020-12-30	2020-02-01	2020-12-26	Hawaii	45-54 years	Non-Hispanic Black	0		0	0	0	0	One or more data cells have counts between 1-9 and have been suppressed in accordance with NCHS confidentiality standards.
2020-12-30	2020-02-01	2020-12-26	Hawaii	50-64 years	Non-Hispanic Black		17	0	0	0		One or more data cells have counts between 1-9 and have been suppressed in accordance with NCHS confidentiality standards.
2020-12-30	2020-02-01	2020-12-26	Hawaii	55-64 years	Non-Hispanic Black		14	0	0	0		One or more data cells have counts between 1-9 and have been suppressed in accordance with NCHS confidentiality standards.
2020-12-30	2020-02-01	2020-12-26	Hawaii	65-74 years	Non-Hispanic Black		25			0		One or more data cells have counts between 1-9 and have been suppressed in accordance with NCHS confidentiality standards.
2020-12-30	2020-02-01	2020-12-26	Hawaii	75-84 years	Non-Hispanic Black	0	13		0	0		One or more data cells have counts between 1-9 and have been suppressed in accordance with NCHS confidentiality standards.
2020-12-30	2020-02-01	2020-12-26	Hawaii	85 years and over	Non-Hispanic Black	0	15	0	0	0	0
2020-12-30	2020-02-01	2020-12-26	Hawaii	Under 1 year	Non-Hispanic American Indian or Alaska Native	0	0	0	0	0	0
2020-12-30	2020-02-01	2020-12-26	Hawaii	0-17 years	Non-Hispanic American Indian or Alaska Native	0	0	0	0	0	0
2020-12-30	2020-02-01	2020-12-26	Hawaii	1-4 years	Non-Hispanic American Indian or Alaska Native	0	0	0	0	0	0
2020-12-30	2020-02-01	2020-12-26	Hawaii	5-14 years	Non-Hispanic American Indian or Alaska Native	0	0	0	0	0	0
2020-12-30	2020-02-01	2020-12-26	Hawaii	15-24 years	Non-Hispanic American Indian or Alaska Native	0		0	0	0	0	One or more data cells have counts between 1-9 and have been suppressed in accordance with NCHS confidentiality standards.
2020-12-30	2020-02-01	2020-12-26	Hawaii	18-29 years	Non-Hispanic American Indian or Alaska Native	0		0	0	0	0	One or more data cells have counts between 1-9 and have been suppressed in accordance with NCHS confidentiality standards.
2020-12-30	2020-02-01	2020-12-26	Hawaii	25-34 years	Non-Hispanic American Indian or Alaska Native	0		0	0	0	0	One or more data cells have counts between 1-9 and have been suppressed in accordance with NCHS confidentiality standards.
2020-12-30	2020-02-01	2020-12-26	Hawaii	30-49 years	Non-Hispanic American Indian or Alaska Native	0		0	0	0	0	One or more data cells have counts between 1-9 and have been suppressed in accordance with NCHS confidentiality standards.
2020-12-30	2020-02-01	2020-12-26	Hawaii	35-44 years	Non-Hispanic American Indian or Alaska Native	0	0	0	0	0	0
2020-12-30	2020-02-01	2020-12-26	Hawaii	45-54 years	Non-Hispanic American Indian or Alaska Native	0		0	0	0	0	One or more data cells have counts between 1-9 and have been suppressed in accordance with NCHS confidentiality standards.
2020-12-30	2020-02-01	2020-12-26	Hawaii	50-64 years	Non-Hispanic American Indian or Alaska Native	0		0	0	0	0	One or more data cells have counts between 1-9 and have been suppressed in accordance with NCHS confidentiality standards.
2020-12-30	2020-02-01	2020-12-26	Hawaii	55-64 years	Non-Hispanic American Indian or Alaska Native	0		0	0	0	0	One or more data cells have counts between 1-9 and have been suppressed in accordance with NCHS confidentiality standards.
2020-12-30	2020-02-01	2020-12-26	Hawaii	65-74 years	Non-Hispanic American Indian or Alaska Native	0		0	0	0	0	One or more data cells have counts between 1-9 and have been suppressed in accordance with NCHS confidentiality standards.
2020-12-30	2020-02-01	2020-12-26	Hawaii	75-84 years	Non-Hispanic American Indian or Alaska Native			0	0	0		One or more data cells have counts between 1-9 and have been suppressed in accordance with NCHS confidentiality standards.
2020-12-30	2020-02-01	2020-12-26	Hawaii	85 years and over	Non-Hispanic American Indian or Alaska Native	0		0	0	0	0	One or more data cells have counts between 1-9 and have been suppressed in accordance with NCHS confidentiality standards.
2020-12-30	2020-02-01	2020-12-26	Hawaii	Under 1 year	Non-Hispanic Asian	0		0	0	0	0	One or more data cells have counts between 1-9 and have been suppressed in accordance with NCHS confidentiality standards.
2020-12-30	2020-02-01	2020-12-26	Hawaii	0-17 years	Non-Hispanic Asian	0	11		0	0		One or more data cells have counts between 1-9 and have been suppressed in accordance with NCHS confidentiality standards.
2020-12-30	2020-02-01	2020-12-26	Hawaii	1-4 years	Non-Hispanic Asian	0		0	0	0	0	One or more data cells have counts between 1-9 and have been suppressed in accordance with NCHS confidentiality standards.
2020-12-30	2020-02-01	2020-12-26	Hawaii	5-14 years	Non-Hispanic Asian	0			0	0		One or more data cells have counts between 1-9 and have been suppressed in accordance with NCHS confidentiality standards.
2020-12-30	2020-02-01	2020-12-26	Hawaii	15-24 years	Non-Hispanic Asian		18		0	0		One or more data cells have counts between 1-9 and have been suppressed in accordance with NCHS confidentiality standards.
2020-12-30	2020-02-01	2020-12-26	Hawaii	18-29 years	Non-Hispanic Asian		28			0		One or more data cells have counts between 1-9 and have been suppressed in accordance with NCHS confidentiality standards.
2020-12-30	2020-02-01	2020-12-26	Hawaii	25-34 years	Non-Hispanic Asian		23			0		One or more data cells have counts between 1-9 and have been suppressed in accordance with NCHS confidentiality standards.
2020-12-30	2020-02-01	2020-12-26	Hawaii	30-49 years	Non-Hispanic Asian		107			0		One or more data cells have counts between 1-9 and have been suppressed in accordance with NCHS confidentiality standards.
2020-12-30	2020-02-01	2020-12-26	Hawaii	35-44 years	Non-Hispanic Asian		52			0		One or more data cells have counts between 1-9 and have been suppressed in accordance with NCHS confidentiality standards.
2020-12-30	2020-02-01	2020-12-26	Hawaii	45-54 years	Non-Hispanic Asian		126			0	10	One or more data cells have counts between 1-9 and have been suppressed in accordance with NCHS confidentiality standards.
2020-12-30	2020-02-01	2020-12-26	Hawaii	50-64 years	Non-Hispanic Asian	22	413	33	13	0	42
2020-12-30	2020-02-01	2020-12-26	Hawaii	55-64 years	Non-Hispanic Asian	16	331	28		0	35	One or more data cells have counts between 1-9 and have been suppressed in accordance with NCHS confidentiality standards.
2020-12-30	2020-02-01	2020-12-26	Hawaii	65-74 years	Non-Hispanic Asian	34	692	59	19		75	One or more data cells have counts between 1-9 and have been suppressed in accordance with NCHS confidentiality standards.
2020-12-30	2020-02-01	2020-12-26	Hawaii	75-84 years	Non-Hispanic Asian	38	993	74	16		98	One or more data cells have counts between 1-9 and have been suppressed in accordance with NCHS confidentiality standards.
2020-12-30	2020-02-01	2020-12-26	Hawaii	85 years and over	Non-Hispanic Asian	75	2566	208	33		253	One or more data cells have counts between 1-9 and have been suppressed in accordance with NCHS confidentiality standards.
2020-12-30	2020-02-01	2020-12-26	Hawaii	Under 1 year	Non-Hispanic Native Hawaiian or Other Pacific Islander	0			0	0		One or more data cells have counts between 1-9 and have been suppressed in accordance with NCHS confidentiality standards.
2020-12-30	2020-02-01	2020-12-26	Hawaii	0-17 years	Non-Hispanic Native Hawaiian or Other Pacific Islander	0	10		0	0		One or more data cells have counts between 1-9 and have been suppressed in accordance with NCHS confidentiality standards.
2020-12-30	2020-02-01	2020-12-26	Hawaii	1-4 years	Non-Hispanic Native Hawaiian or Other Pacific Islander	0			0	0		One or more data cells have counts between 1-9 and have been suppressed in accordance with NCHS confidentiality standards.
2020-12-30	2020-02-01	2020-12-26	Hawaii	5-14 years	Non-Hispanic Native Hawaiian or Other Pacific Islander	0			0	0		One or more data cells have counts between 1-9 and have been suppressed in accordance with NCHS confidentiality standards.
2020-12-30	2020-02-01	2020-12-26	Hawaii	15-24 years	Non-Hispanic Native Hawaiian or Other Pacific Islander	0	12		0	0		One or more data cells have counts between 1-9 and have been suppressed in accordance with NCHS confidentiality standards.
2020-12-30	2020-02-01	2020-12-26	Hawaii	18-29 years	Non-Hispanic Native Hawaiian or Other Pacific Islander	0	24		0	0		One or more data cells have counts between 1-9 and have been suppressed in accordance with NCHS confidentiality standards.
2020-12-30	2020-02-01	2020-12-26	Hawaii	25-34 years	Non-Hispanic Native Hawaiian or Other Pacific Islander	0	24		0	0		One or more data cells have counts between 1-9 and have been suppressed in accordance with NCHS confidentiality standards.
2020-12-30	2020-02-01	2020-12-26	Hawaii	30-49 years	Non-Hispanic Native Hawaiian or Other Pacific Islander		98			0		One or more data cells have counts between 1-9 and have been suppressed in accordance with NCHS confidentiality standards.
2020-12-30	2020-02-01	2020-12-26	Hawaii	35-44 years	Non-Hispanic Native Hawaiian or Other Pacific Islander		49			0		One or more data cells have counts between 1-9 and have been suppressed in accordance with NCHS confidentiality standards.
2020-12-30	2020-02-01	2020-12-26	Hawaii	45-54 years	Non-Hispanic Native Hawaiian or Other Pacific Islander		100			0	10	One or more data cells have counts between 1-9 and have been suppressed in accordance with NCHS confidentiality standards.
2020-12-30	2020-02-01	2020-12-26	Hawaii	50-64 years	Non-Hispanic Native Hawaiian or Other Pacific Islander	28	201	20	12		37	One or more data cells have counts between 1-9 and have been suppressed in accordance with NCHS confidentiality standards.
2020-12-30	2020-02-01	2020-12-26	Hawaii	55-64 years	Non-Hispanic Native Hawaiian or Other Pacific Islander	22	139	16	10		29	One or more data cells have counts between 1-9 and have been suppressed in accordance with NCHS confidentiality standards.
2020-12-30	2020-02-01	2020-12-26	Hawaii	65-74 years	Non-Hispanic Native Hawaiian or Other Pacific Islander	24	199	20	13		32	One or more data cells have counts between 1-9 and have been suppressed in accordance with NCHS confidentiality standards.
2020-12-30	2020-02-01	2020-12-26	Hawaii	75-84 years	Non-Hispanic Native Hawaiian or Other Pacific Islander	14	157	17		0	23	One or more data cells have counts between 1-9 and have been suppressed in accordance with NCHS confidentiality standards.
2020-12-30	2020-02-01	2020-12-26	Hawaii	85 years and over	Non-Hispanic Native Hawaiian or Other Pacific Islander		90			0	10	One or more data cells have counts between 1-9 and have been suppressed in accordance with NCHS confidentiality standards.
2020-12-30	2020-02-01	2020-12-26	Hawaii	Under 1 year	Non-Hispanic More than one race	0	26		0	0		One or more data cells have counts between 1-9 and have been suppressed in accordance with NCHS confidentiality standards.
2020-12-30	2020-02-01	2020-12-26	Hawaii	0-17 years	Non-Hispanic More than one race	0	34		0	0		One or more data cells have counts between 1-9 and have been suppressed in accordance with NCHS confidentiality standards.
2020-12-30	2020-02-01	2020-12-26	Hawaii	1-4 years	Non-Hispanic More than one race	0		0	0	0	0	One or more data cells have counts between 1-9 and have been suppressed in accordance with NCHS confidentiality standards.
2020-12-30	2020-02-01	2020-12-26	Hawaii	5-14 years	Non-Hispanic More than one race	0			0	0		One or more data cells have counts between 1-9 and have been suppressed in accordance with NCHS confidentiality standards.
2020-12-30	2020-02-01	2020-12-26	Hawaii	15-24 years	Non-Hispanic More than one race	0	18	0	0	0	0
2020-12-30	2020-02-01	2020-12-26	Hawaii	18-29 years	Non-Hispanic More than one race	0	34	0	0	0	0
2020-12-30	2020-02-01	2020-12-26	Hawaii	25-34 years	Non-Hispanic More than one race	0	49		0	0		One or more data cells have counts between 1-9 and have been suppressed in accordance with NCHS confidentiality standards.
2020-12-30	2020-02-01	2020-12-26	Hawaii	30-49 years	Non-Hispanic More than one race		185			0		One or more data cells have counts between 1-9 and have been suppressed in accordance with NCHS confidentiality standards.
2020-12-30	2020-02-01	2020-12-26	Hawaii	35-44 years	Non-Hispanic More than one race	0	80		0	0		One or more data cells have counts between 1-9 and have been suppressed in accordance with NCHS confidentiality standards.
2020-12-30	2020-02-01	2020-12-26	Hawaii	45-54 years	Non-Hispanic More than one race		177			0		One or more data cells have counts between 1-9 and have been suppressed in accordance with NCHS confidentiality standards.
2020-12-30	2020-02-01	2020-12-26	Hawaii	50-64 years	Non-Hispanic More than one race		430	15			23	One or more data cells have counts between 1-9 and have been suppressed in accordance with NCHS confidentiality standards.
2020-12-30	2020-02-01	2020-12-26	Hawaii	55-64 years	Non-Hispanic More than one race		327	12			19	One or more data cells have counts between 1-9 and have been suppressed in accordance with NCHS confidentiality standards.
2020-12-30	2020-02-01	2020-12-26	Hawaii	65-74 years	Non-Hispanic More than one race		387	23		0	27	One or more data cells have counts between 1-9 and have been suppressed in accordance with NCHS confidentiality standards.
2020-12-30	2020-02-01	2020-12-26	Hawaii	75-84 years	Non-Hispanic More than one race		386	23			26	One or more data cells have counts between 1-9 and have been suppressed in accordance with NCHS confidentiality standards.
2020-12-30	2020-02-01	2020-12-26	Hawaii	85 years and over	Non-Hispanic More than one race		307	15			19	One or more data cells have counts between 1-9 and have been suppressed in accordance with NCHS confidentiality standards.
2020-12-30	2020-02-01	2020-12-26	Hawaii	Under 1 year	Hispanic	0	20	0	0	0	0
2020-12-30	2020-02-01	2020-12-26	Hawaii	0-17 years	Hispanic	0	29	0	0	0	0
2020-12-30	2020-02-01	2020-12-26	Hawaii	1-4 years	Hispanic	0		0	0	0	0	One or more data cells have counts between 1-9 and have been suppressed in accordance with NCHS confidentiality standards.
2020-12-30	2020-02-01	2020-12-26	Hawaii	5-14 years	Hispanic	0		0	0	0	0	One or more data cells have counts between 1-9 and have been suppressed in accordance with NCHS confidentiality standards.
2020-12-30	2020-02-01	2020-12-26	Hawaii	15-24 years	Hispanic	0	14	0	0	0	0
2020-12-30	2020-02-01	2020-12-26	Hawaii	18-29 years	Hispanic		23			0		One or more data cells have counts between 1-9 and have been suppressed in accordance with NCHS confidentiality standards.
2020-12-30	2020-02-01	2020-12-26	Hawaii	25-34 years	Hispanic		24			0		One or more data cells have counts between 1-9 and have been suppressed in accordance with NCHS confidentiality standards.
2020-12-30	2020-02-01	2020-12-26	Hawaii	30-49 years	Hispanic	0	73		0	0		One or more data cells have counts between 1-9 and have been suppressed in accordance with NCHS confidentiality standards.
2020-12-30	2020-02-01	2020-12-26	Hawaii	35-44 years	Hispanic	0	32		0	0		One or more data cells have counts between 1-9 and have been suppressed in accordance with NCHS confidentiality standards.
2020-12-30	2020-02-01	2020-12-26	Hawaii	45-54 years	Hispanic		49		0	0		One or more data cells have counts between 1-9 and have been suppressed in accordance with NCHS confidentiality standards.
2020-12-30	2020-02-01	2020-12-26	Hawaii	50-64 years	Hispanic		114				11	One or more data cells have counts between 1-9 and have been suppressed in accordance with NCHS confidentiality standards.
2020-12-30	2020-02-01	2020-12-26	Hawaii	55-64 years	Hispanic		94					One or more data cells have counts between 1-9 and have been suppressed in accordance with NCHS confidentiality standards.
2020-12-30	2020-02-01	2020-12-26	Hawaii	65-74 years	Hispanic		105			0		One or more data cells have counts between 1-9 and have been suppressed in accordance with NCHS confidentiality standards.
2020-12-30	2020-02-01	2020-12-26	Hawaii	75-84 years	Hispanic		106			0		One or more data cells have counts between 1-9 and have been suppressed in accordance with NCHS confidentiality standards.
2020-12-30	2020-02-01	2020-12-26	Hawaii	85 years and over	Hispanic		133	10		0	13	One or more data cells have counts between 1-9 and have been suppressed in accordance with NCHS confidentiality standards.
2020-12-30	2020-02-01	2020-12-26	Hawaii	Under 1 year	Unknown	0		0	0	0	0	One or more data cells have counts between 1-9 and have been suppressed in accordance with NCHS confidentiality standards.
2020-12-30	2020-02-01	2020-12-26	Hawaii	0-17 years	Unknown	0		0	0	0	0	One or more data cells have counts between 1-9 and have been suppressed in accordance with NCHS confidentiality standards.
2020-12-30	2020-02-01	2020-12-26	Hawaii	1-4 years	Unknown	0	0	0	0	0	0
2020-12-30	2020-02-01	2020-12-26	Hawaii	5-14 years	Unknown	0	0	0	0	0	0
2020-12-30	2020-02-01	2020-12-26	Hawaii	15-24 years	Unknown	0	0	0	0	0	0
2020-12-30	2020-02-01	2020-12-26	Hawaii	18-29 years	Unknown	0	0	0	0	0	0
2020-12-30	2020-02-01	2020-12-26	Hawaii	25-34 years	Unknown	0		0	0	0	0	One or more data cells have counts between 1-9 and have been suppressed in accordance with NCHS confidentiality standards.
2020-12-30	2020-02-01	2020-12-26	Hawaii	30-49 years	Unknown	0	11	0	0	0	0
2020-12-30	2020-02-01	2020-12-26	Hawaii	35-44 years	Unknown	0		0	0	0	0	One or more data cells have counts between 1-9 and have been suppressed in accordance with NCHS confidentiality standards.
2020-12-30	2020-02-01	2020-12-26	Hawaii	45-54 years	Unknown	0	11	0	0	0	0
2020-12-30	2020-02-01	2020-12-26	Hawaii	50-64 years	Unknown	0	49		0	0		One or more data cells have counts between 1-9 and have been suppressed in accordance with NCHS confidentiality standards.
2020-12-30	2020-02-01	2020-12-26	Hawaii	55-64 years	Unknown	0	42		0	0		One or more data cells have counts between 1-9 and have been suppressed in accordance with NCHS confidentiality standards.
2020-12-30	2020-02-01	2020-12-26	Hawaii	65-74 years	Unknown		55			0		One or more data cells have counts between 1-9 and have been suppressed in accordance with NCHS confidentiality standards.
2020-12-30	2020-02-01	2020-12-26	Hawaii	75-84 years	Unknown	0	33		0	0		One or more data cells have counts between 1-9 and have been suppressed in accordance with NCHS confidentiality standards.
2020-12-30	2020-02-01	2020-12-26	Hawaii	85 years and over	Unknown	0	17	0	0	0	0
2020-12-30	2020-02-01	2020-12-26	Idaho	Under 1 year	Non-Hispanic White	0	58	0	0	0	0
2020-12-30	2020-02-01	2020-12-26	Idaho	0-17 years	Non-Hispanic White	0	132		0	0		One or more data cells have counts between 1-9 and have been suppressed in accordance with NCHS confidentiality standards.
2020-12-30	2020-02-01	2020-12-26	Idaho	1-4 years	Non-Hispanic White	0	18		0	0		One or more data cells have counts between 1-9 and have been suppressed in accordance with NCHS confidentiality standards.
2020-12-30	2020-02-01	2020-12-26	Idaho	5-14 years	Non-Hispanic White	0	21		0	0		One or more data cells have counts between 1-9 and have been suppressed in accordance with NCHS confidentiality standards.
2020-12-30	2020-02-01	2020-12-26	Idaho	15-24 years	Non-Hispanic White		127		0			One or more data cells have counts between 1-9 and have been suppressed in accordance with NCHS confidentiality standards.
2020-12-30	2020-02-01	2020-12-26	Idaho	18-29 years	Non-Hispanic White		193		0			One or more data cells have counts between 1-9 and have been suppressed in accordance with NCHS confidentiality standards.
2020-12-30	2020-02-01	2020-12-26	Idaho	25-34 years	Non-Hispanic White		213			0		One or more data cells have counts between 1-9 and have been suppressed in accordance with NCHS confidentiality standards.
2020-12-30	2020-02-01	2020-12-26	Idaho	30-49 years	Non-Hispanic White	16	681	17			26	One or more data cells have counts between 1-9 and have been suppressed in accordance with NCHS confidentiality standards.
2020-12-30	2020-02-01	2020-12-26	Idaho	35-44 years	Non-Hispanic White		331					One or more data cells have counts between 1-9 and have been suppressed in accordance with NCHS confidentiality standards.
2020-12-30	2020-02-01	2020-12-26	Idaho	45-54 years	Non-Hispanic White	16	558	23		0	30	One or more data cells have counts between 1-9 and have been suppressed in accordance with NCHS confidentiality standards.
2020-12-30	2020-02-01	2020-12-26	Idaho	50-64 years	Non-Hispanic White	65	1830	105	28		146	One or more data cells have counts between 1-9 and have been suppressed in accordance with NCHS confidentiality standards.
2020-12-30	2020-02-01	2020-12-26	Idaho	55-64 years	Non-Hispanic White	61	1510	92	25		132	One or more data cells have counts between 1-9 and have been suppressed in accordance with NCHS confidentiality standards.
2020-12-30	2020-02-01	2020-12-26	Idaho	65-74 years	Non-Hispanic White	207	2666	197	93		319	One or more data cells have counts between 1-9 and have been suppressed in accordance with NCHS confidentiality standards.
2020-12-30	2020-02-01	2020-12-26	Idaho	75-84 years	Non-Hispanic White	317	3585	266	130		455	One or more data cells have counts between 1-9 and have been suppressed in accordance with NCHS confidentiality standards.
2020-12-30	2020-02-01	2020-12-26	Idaho	85 years and over	Non-Hispanic White	408	4212	282	144		553	One or more data cells have counts between 1-9 and have been suppressed in accordance with NCHS confidentiality standards.
2020-12-30	2020-02-01	2020-12-26	Idaho	Under 1 year	Non-Hispanic Black	0		0	0	0	0	One or more data cells have counts between 1-9 and have been suppressed in accordance with NCHS confidentiality standards.
2020-12-30	2020-02-01	2020-12-26	Idaho	0-17 years	Non-Hispanic Black	0		0	0	0	0	One or more data cells have counts between 1-9 and have been suppressed in accordance with NCHS confidentiality standards.
2020-12-30	2020-02-01	2020-12-26	Idaho	1-4 years	Non-Hispanic Black	0	0	0	0	0	0
2020-12-30	2020-02-01	2020-12-26	Idaho	5-14 years	Non-Hispanic Black	0	0	0	0	0	0
2020-12-30	2020-02-01	2020-12-26	Idaho	15-24 years	Non-Hispanic Black	0		0	0	0	0	One or more data cells have counts between 1-9 and have been suppressed in accordance with NCHS confidentiality standards.
2020-12-30	2020-02-01	2020-12-26	Idaho	18-29 years	Non-Hispanic Black	0		0	0	0	0	One or more data cells have counts between 1-9 and have been suppressed in accordance with NCHS confidentiality standards.
2020-12-30	2020-02-01	2020-12-26	Idaho	25-34 years	Non-Hispanic Black	0		0	0	0	0	One or more data cells have counts between 1-9 and have been suppressed in accordance with NCHS confidentiality standards.
2020-12-30	2020-02-01	2020-12-26	Idaho	30-49 years	Non-Hispanic Black		13	0	0	0		One or more data cells have counts between 1-9 and have been suppressed in accordance with NCHS confidentiality standards.
2020-12-30	2020-02-01	2020-12-26	Idaho	35-44 years	Non-Hispanic Black	0		0	0	0	0	One or more data cells have counts between 1-9 and have been suppressed in accordance with NCHS confidentiality standards.
2020-12-30	2020-02-01	2020-12-26	Idaho	45-54 years	Non-Hispanic Black			0	0	0		One or more data cells have counts between 1-9 and have been suppressed in accordance with NCHS confidentiality standards.
2020-12-30	2020-02-01	2020-12-26	Idaho	50-64 years	Non-Hispanic Black	0	12	0	0	0	0
2020-12-30	2020-02-01	2020-12-26	Idaho	55-64 years	Non-Hispanic Black	0		0	0	0	0	One or more data cells have counts between 1-9 and have been suppressed in accordance with NCHS confidentiality standards.
2020-12-30	2020-02-01	2020-12-26	Idaho	65-74 years	Non-Hispanic Black		10			0		One or more data cells have counts between 1-9 and have been suppressed in accordance with NCHS confidentiality standards.
2020-12-30	2020-02-01	2020-12-26	Idaho	75-84 years	Non-Hispanic Black	0		0	0	0	0	One or more data cells have counts between 1-9 and have been suppressed in accordance with NCHS confidentiality standards.
2020-12-30	2020-02-01	2020-12-26	Idaho	85 years and over	Non-Hispanic Black					0		One or more data cells have counts between 1-9 and have been suppressed in accordance with NCHS confidentiality standards.
2020-12-30	2020-02-01	2020-12-26	Idaho	Under 1 year	Non-Hispanic American Indian or Alaska Native	0		0	0	0	0	One or more data cells have counts between 1-9 and have been suppressed in accordance with NCHS confidentiality standards.
2020-12-30	2020-02-01	2020-12-26	Idaho	0-17 years	Non-Hispanic American Indian or Alaska Native	0		0	0	0	0	One or more data cells have counts between 1-9 and have been suppressed in accordance with NCHS confidentiality standards.
2020-12-30	2020-02-01	2020-12-26	Idaho	1-4 years	Non-Hispanic American Indian or Alaska Native	0	0	0	0	0	0
2020-12-30	2020-02-01	2020-12-26	Idaho	5-14 years	Non-Hispanic American Indian or Alaska Native	0	0	0	0	0	0
2020-12-30	2020-02-01	2020-12-26	Idaho	15-24 years	Non-Hispanic American Indian or Alaska Native	0		0	0	0	0	One or more data cells have counts between 1-9 and have been suppressed in accordance with NCHS confidentiality standards.
2020-12-30	2020-02-01	2020-12-26	Idaho	18-29 years	Non-Hispanic American Indian or Alaska Native	0		0	0	0	0	One or more data cells have counts between 1-9 and have been suppressed in accordance with NCHS confidentiality standards.
2020-12-30	2020-02-01	2020-12-26	Idaho	25-34 years	Non-Hispanic American Indian or Alaska Native	0		0	0	0	0	One or more data cells have counts between 1-9 and have been suppressed in accordance with NCHS confidentiality standards.
2020-12-30	2020-02-01	2020-12-26	Idaho	30-49 years	Non-Hispanic American Indian or Alaska Native		26					One or more data cells have counts between 1-9 and have been suppressed in accordance with NCHS confidentiality standards.
2020-12-30	2020-02-01	2020-12-26	Idaho	35-44 years	Non-Hispanic American Indian or Alaska Native	0	11	0	0			One or more data cells have counts between 1-9 and have been suppressed in accordance with NCHS confidentiality standards.
2020-12-30	2020-02-01	2020-12-26	Idaho	45-54 years	Non-Hispanic American Indian or Alaska Native		21			0		One or more data cells have counts between 1-9 and have been suppressed in accordance with NCHS confidentiality standards.
2020-12-30	2020-02-01	2020-12-26	Idaho	50-64 years	Non-Hispanic American Indian or Alaska Native		38			0		One or more data cells have counts between 1-9 and have been suppressed in accordance with NCHS confidentiality standards.
2020-12-30	2020-02-01	2020-12-26	Idaho	55-64 years	Non-Hispanic American Indian or Alaska Native		29			0		One or more data cells have counts between 1-9 and have been suppressed in accordance with NCHS confidentiality standards.
2020-12-30	2020-02-01	2020-12-26	Idaho	65-74 years	Non-Hispanic American Indian or Alaska Native		45					One or more data cells have counts between 1-9 and have been suppressed in accordance with NCHS confidentiality standards.
2020-12-30	2020-02-01	2020-12-26	Idaho	75-84 years	Non-Hispanic American Indian or Alaska Native		32			0		One or more data cells have counts between 1-9 and have been suppressed in accordance with NCHS confidentiality standards.
2020-12-30	2020-02-01	2020-12-26	Idaho	85 years and over	Non-Hispanic American Indian or Alaska Native		13	0	0	0		One or more data cells have counts between 1-9 and have been suppressed in accordance with NCHS confidentiality standards.
2020-12-30	2020-02-01	2020-12-26	Idaho	Under 1 year	Non-Hispanic Asian	0		0	0	0	0	One or more data cells have counts between 1-9 and have been suppressed in accordance with NCHS confidentiality standards.
2020-12-30	2020-02-01	2020-12-26	Idaho	0-17 years	Non-Hispanic Asian	0		0	0	0	0	One or more data cells have counts between 1-9 and have been suppressed in accordance with NCHS confidentiality standards.
2020-12-30	2020-02-01	2020-12-26	Idaho	1-4 years	Non-Hispanic Asian	0	0	0	0	0	0
2020-12-30	2020-02-01	2020-12-26	Idaho	5-14 years	Non-Hispanic Asian	0	0	0	0	0	0
2020-12-30	2020-02-01	2020-12-26	Idaho	15-24 years	Non-Hispanic Asian	0		0	0	0	0	One or more data cells have counts between 1-9 and have been suppressed in accordance with NCHS confidentiality standards.
2020-12-30	2020-02-01	2020-12-26	Idaho	18-29 years	Non-Hispanic Asian	0		0	0	0	0	One or more data cells have counts between 1-9 and have been suppressed in accordance with NCHS confidentiality standards.
2020-12-30	2020-02-01	2020-12-26	Idaho	25-34 years	Non-Hispanic Asian	0		0	0	0	0	One or more data cells have counts between 1-9 and have been suppressed in accordance with NCHS confidentiality standards.
2020-12-30	2020-02-01	2020-12-26	Idaho	30-49 years	Non-Hispanic Asian			0	0	0		One or more data cells have counts between 1-9 and have been suppressed in accordance with NCHS confidentiality standards.
2020-12-30	2020-02-01	2020-12-26	Idaho	35-44 years	Non-Hispanic Asian			0	0	0		One or more data cells have counts between 1-9 and have been suppressed in accordance with NCHS confidentiality standards.
2020-12-30	2020-02-01	2020-12-26	Idaho	45-54 years	Non-Hispanic Asian					0		One or more data cells have counts between 1-9 and have been suppressed in accordance with NCHS confidentiality standards.
2020-12-30	2020-02-01	2020-12-26	Idaho	50-64 years	Non-Hispanic Asian		11			0		One or more data cells have counts between 1-9 and have been suppressed in accordance with NCHS confidentiality standards.
2020-12-30	2020-02-01	2020-12-26	Idaho	55-64 years	Non-Hispanic Asian	0	10	0	0	0	0
2020-12-30	2020-02-01	2020-12-26	Idaho	65-74 years	Non-Hispanic Asian		14			0		One or more data cells have counts between 1-9 and have been suppressed in accordance with NCHS confidentiality standards.
2020-12-30	2020-02-01	2020-12-26	Idaho	75-84 years	Non-Hispanic Asian		22			0		One or more data cells have counts between 1-9 and have been suppressed in accordance with NCHS confidentiality standards.
2020-12-30	2020-02-01	2020-12-26	Idaho	85 years and over	Non-Hispanic Asian		52		0	0		One or more data cells have counts between 1-9 and have been suppressed in accordance with NCHS confidentiality standards.
2020-12-30	2020-02-01	2020-12-26	Idaho	Under 1 year	Non-Hispanic Native Hawaiian or Other Pacific Islander	0		0	0	0	0	One or more data cells have counts between 1-9 and have been suppressed in accordance with NCHS confidentiality standards.
2020-12-30	2020-02-01	2020-12-26	Idaho	0-17 years	Non-Hispanic Native Hawaiian or Other Pacific Islander	0		0	0	0	0	One or more data cells have counts between 1-9 and have been suppressed in accordance with NCHS confidentiality standards.
2020-12-30	2020-02-01	2020-12-26	Idaho	1-4 years	Non-Hispanic Native Hawaiian or Other Pacific Islander	0	0	0	0	0	0
2020-12-30	2020-02-01	2020-12-26	Idaho	5-14 years	Non-Hispanic Native Hawaiian or Other Pacific Islander	0	0	0	0	0	0
2020-12-30	2020-02-01	2020-12-26	Idaho	15-24 years	Non-Hispanic Native Hawaiian or Other Pacific Islander	0		0	0	0	0	One or more data cells have counts between 1-9 and have been suppressed in accordance with NCHS confidentiality standards.
2020-12-30	2020-02-01	2020-12-26	Idaho	18-29 years	Non-Hispanic Native Hawaiian or Other Pacific Islander	0		0	0	0	0	One or more data cells have counts between 1-9 and have been suppressed in accordance with NCHS confidentiality standards.
2020-12-30	2020-02-01	2020-12-26	Idaho	25-34 years	Non-Hispanic Native Hawaiian or Other Pacific Islander	0		0	0	0	0	One or more data cells have counts between 1-9 and have been suppressed in accordance with NCHS confidentiality standards.
2020-12-30	2020-02-01	2020-12-26	Idaho	30-49 years	Non-Hispanic Native Hawaiian or Other Pacific Islander	0		0	0	0	0	One or more data cells have counts between 1-9 and have been suppressed in accordance with NCHS confidentiality standards.
2020-12-30	2020-02-01	2020-12-26	Idaho	35-44 years	Non-Hispanic Native Hawaiian or Other Pacific Islander	0		0	0	0	0	One or more data cells have counts between 1-9 and have been suppressed in accordance with NCHS confidentiality standards.
2020-12-30	2020-02-01	2020-12-26	Idaho	45-54 years	Non-Hispanic Native Hawaiian or Other Pacific Islander	0		0	0	0	0	One or more data cells have counts between 1-9 and have been suppressed in accordance with NCHS confidentiality standards.
2020-12-30	2020-02-01	2020-12-26	Idaho	50-64 years	Non-Hispanic Native Hawaiian or Other Pacific Islander	0		0	0	0	0	One or more data cells have counts between 1-9 and have been suppressed in accordance with NCHS confidentiality standards.
2020-12-30	2020-02-01	2020-12-26	Idaho	55-64 years	Non-Hispanic Native Hawaiian or Other Pacific Islander	0		0	0	0	0	One or more data cells have counts between 1-9 and have been suppressed in accordance with NCHS confidentiality standards.
2020-12-30	2020-02-01	2020-12-26	Idaho	65-74 years	Non-Hispanic Native Hawaiian or Other Pacific Islander	0		0	0	0	0	One or more data cells have counts between 1-9 and have been suppressed in accordance with NCHS confidentiality standards.
2020-12-30	2020-02-01	2020-12-26	Idaho	75-84 years	Non-Hispanic Native Hawaiian or Other Pacific Islander			0	0	0		One or more data cells have counts between 1-9 and have been suppressed in accordance with NCHS confidentiality standards.
2020-12-30	2020-02-01	2020-12-26	Idaho	85 years and over	Non-Hispanic Native Hawaiian or Other Pacific Islander	0		0	0	0	0	One or more data cells have counts between 1-9 and have been suppressed in accordance with NCHS confidentiality standards.
2020-12-30	2020-02-01	2020-12-26	Idaho	Under 1 year	Non-Hispanic More than one race	0		0	0	0	0	One or more data cells have counts between 1-9 and have been suppressed in accordance with NCHS confidentiality standards.
2020-12-30	2020-02-01	2020-12-26	Idaho	0-17 years	Non-Hispanic More than one race	0		0	0	0	0	One or more data cells have counts between 1-9 and have been suppressed in accordance with NCHS confidentiality standards.
2020-12-30	2020-02-01	2020-12-26	Idaho	1-4 years	Non-Hispanic More than one race	0	0	0	0	0	0
2020-12-30	2020-02-01	2020-12-26	Idaho	5-14 years	Non-Hispanic More than one race	0		0	0	0	0	One or more data cells have counts between 1-9 and have been suppressed in accordance with NCHS confidentiality standards.
2020-12-30	2020-02-01	2020-12-26	Idaho	15-24 years	Non-Hispanic More than one race	0		0	0	0	0	One or more data cells have counts between 1-9 and have been suppressed in accordance with NCHS confidentiality standards.
2020-12-30	2020-02-01	2020-12-26	Idaho	18-29 years	Non-Hispanic More than one race	0		0	0	0	0	One or more data cells have counts between 1-9 and have been suppressed in accordance with NCHS confidentiality standards.
2020-12-30	2020-02-01	2020-12-26	Idaho	25-34 years	Non-Hispanic More than one race	0		0	0	0	0	One or more data cells have counts between 1-9 and have been suppressed in accordance with NCHS confidentiality standards.
2020-12-30	2020-02-01	2020-12-26	Idaho	30-49 years	Non-Hispanic More than one race			0	0	0		One or more data cells have counts between 1-9 and have been suppressed in accordance with NCHS confidentiality standards.
2020-12-30	2020-02-01	2020-12-26	Idaho	35-44 years	Non-Hispanic More than one race			0	0	0		One or more data cells have counts between 1-9 and have been suppressed in accordance with NCHS confidentiality standards.
2020-12-30	2020-02-01	2020-12-26	Idaho	45-54 years	Non-Hispanic More than one race	0		0	0	0	0	One or more data cells have counts between 1-9 and have been suppressed in accordance with NCHS confidentiality standards.
2020-12-30	2020-02-01	2020-12-26	Idaho	50-64 years	Non-Hispanic More than one race	0		0	0	0	0	One or more data cells have counts between 1-9 and have been suppressed in accordance with NCHS confidentiality standards.
2020-12-30	2020-02-01	2020-12-26	Idaho	55-64 years	Non-Hispanic More than one race	0		0	0	0	0	One or more data cells have counts between 1-9 and have been suppressed in accordance with NCHS confidentiality standards.
2020-12-30	2020-02-01	2020-12-26	Idaho	65-74 years	Non-Hispanic More than one race		13			0		One or more data cells have counts between 1-9 and have been suppressed in accordance with NCHS confidentiality standards.
2020-12-30	2020-02-01	2020-12-26	Idaho	75-84 years	Non-Hispanic More than one race					0		One or more data cells have counts between 1-9 and have been suppressed in accordance with NCHS confidentiality standards.
2020-12-30	2020-02-01	2020-12-26	Idaho	85 years and over	Non-Hispanic More than one race	0		0	0	0	0	One or more data cells have counts between 1-9 and have been suppressed in accordance with NCHS confidentiality standards.
2020-12-30	2020-02-01	2020-12-26	Idaho	Under 1 year	Hispanic	0	14	0	0	0	0
2020-12-30	2020-02-01	2020-12-26	Idaho	0-17 years	Hispanic	0	27	0	0	0	0
2020-12-30	2020-02-01	2020-12-26	Idaho	1-4 years	Hispanic	0		0	0	0	0	One or more data cells have counts between 1-9 and have been suppressed in accordance with NCHS confidentiality standards.
2020-12-30	2020-02-01	2020-12-26	Idaho	5-14 years	Hispanic	0		0	0	0	0	One or more data cells have counts between 1-9 and have been suppressed in accordance with NCHS confidentiality standards.
2020-12-30	2020-02-01	2020-12-26	Idaho	15-24 years	Hispanic	0	28	0	0	0	0
2020-12-30	2020-02-01	2020-12-26	Idaho	18-29 years	Hispanic	0	39	0	0	0	0
2020-12-30	2020-02-01	2020-12-26	Idaho	25-34 years	Hispanic		36	0	0	0		One or more data cells have counts between 1-9 and have been suppressed in accordance with NCHS confidentiality standards.
2020-12-30	2020-02-01	2020-12-26	Idaho	30-49 years	Hispanic	11	100			0	11	One or more data cells have counts between 1-9 and have been suppressed in accordance with NCHS confidentiality standards.
2020-12-30	2020-02-01	2020-12-26	Idaho	35-44 years	Hispanic		53			0		One or more data cells have counts between 1-9 and have been suppressed in accordance with NCHS confidentiality standards.
2020-12-30	2020-02-01	2020-12-26	Idaho	45-54 years	Hispanic	10	68			0	15	One or more data cells have counts between 1-9 and have been suppressed in accordance with NCHS confidentiality standards.
2020-12-30	2020-02-01	2020-12-26	Idaho	50-64 years	Hispanic	37	149	31	21	0	47
2020-12-30	2020-02-01	2020-12-26	Idaho	55-64 years	Hispanic	29	108	22	17	0	34
2020-12-30	2020-02-01	2020-12-26	Idaho	65-74 years	Hispanic	38	131	23	18	0	43
2020-12-30	2020-02-01	2020-12-26	Idaho	75-84 years	Hispanic	30	112	18	15	0	33
2020-12-30	2020-02-01	2020-12-26	Idaho	85 years and over	Hispanic	20	113	13	11	0	22
2020-12-30	2020-02-01	2020-12-26	Idaho	Under 1 year	Unknown	0		0	0	0	0	One or more data cells have counts between 1-9 and have been suppressed in accordance with NCHS confidentiality standards.
2020-12-30	2020-02-01	2020-12-26	Idaho	0-17 years	Unknown	0		0	0	0	0	One or more data cells have counts between 1-9 and have been suppressed in accordance with NCHS confidentiality standards.
2020-12-30	2020-02-01	2020-12-26	Idaho	1-4 years	Unknown	0	0	0	0	0	0
2020-12-30	2020-02-01	2020-12-26	Idaho	5-14 years	Unknown	0	0	0	0	0	0
2020-12-30	2020-02-01	2020-12-26	Idaho	15-24 years	Unknown	0		0	0	0	0	One or more data cells have counts between 1-9 and have been suppressed in accordance with NCHS confidentiality standards.
2020-12-30	2020-02-01	2020-12-26	Idaho	18-29 years	Unknown	0		0	0	0	0	One or more data cells have counts between 1-9 and have been suppressed in accordance with NCHS confidentiality standards.
2020-12-30	2020-02-01	2020-12-26	Idaho	25-34 years	Unknown	0	0	0	0	0	0
2020-12-30	2020-02-01	2020-12-26	Idaho	30-49 years	Unknown	0		0	0	0	0	One or more data cells have counts between 1-9 and have been suppressed in accordance with NCHS confidentiality standards.
2020-12-30	2020-02-01	2020-12-26	Idaho	35-44 years	Unknown	0		0	0	0	0	One or more data cells have counts between 1-9 and have been suppressed in accordance with NCHS confidentiality standards.
2020-12-30	2020-02-01	2020-12-26	Idaho	45-54 years	Unknown	0		0	0	0	0	One or more data cells have counts between 1-9 and have been suppressed in accordance with NCHS confidentiality standards.
2020-12-30	2020-02-01	2020-12-26	Idaho	50-64 years	Unknown	0		0	0	0	0	One or more data cells have counts between 1-9 and have been suppressed in accordance with NCHS confidentiality standards.
2020-12-30	2020-02-01	2020-12-26	Idaho	55-64 years	Unknown	0		0	0	0	0	One or more data cells have counts between 1-9 and have been suppressed in accordance with NCHS confidentiality standards.
2020-12-30	2020-02-01	2020-12-26	Idaho	65-74 years	Unknown					0		One or more data cells have counts between 1-9 and have been suppressed in accordance with NCHS confidentiality standards.
2020-12-30	2020-02-01	2020-12-26	Idaho	75-84 years	Unknown	0		0	0	0	0	One or more data cells have counts between 1-9 and have been suppressed in accordance with NCHS confidentiality standards.
2020-12-30	2020-02-01	2020-12-26	Idaho	85 years and over	Unknown	0		0	0	0	0	One or more data cells have counts between 1-9 and have been suppressed in accordance with NCHS confidentiality standards.
2020-12-30	2020-02-01	2020-12-26	Illinois	Under 1 year	Non-Hispanic White		200		0	0		One or more data cells have counts between 1-9 and have been suppressed in accordance with NCHS confidentiality standards.
2020-12-30	2020-02-01	2020-12-26	Illinois	0-17 years	Non-Hispanic White		402		0			One or more data cells have counts between 1-9 and have been suppressed in accordance with NCHS confidentiality standards.
2020-12-30	2020-02-01	2020-12-26	Illinois	1-4 years	Non-Hispanic White	0	42		0	0		One or more data cells have counts between 1-9 and have been suppressed in accordance with NCHS confidentiality standards.
2020-12-30	2020-02-01	2020-12-26	Illinois	5-14 years	Non-Hispanic White	0	82		0	0		One or more data cells have counts between 1-9 and have been suppressed in accordance with NCHS confidentiality standards.
2020-12-30	2020-02-01	2020-12-26	Illinois	15-24 years	Non-Hispanic White		456		0			One or more data cells have counts between 1-9 and have been suppressed in accordance with NCHS confidentiality standards.
2020-12-30	2020-02-01	2020-12-26	Illinois	18-29 years	Non-Hispanic White		858	13			17	One or more data cells have counts between 1-9 and have been suppressed in accordance with NCHS confidentiality standards.
2020-12-30	2020-02-01	2020-12-26	Illinois	25-34 years	Non-Hispanic White		1080	27			33	One or more data cells have counts between 1-9 and have been suppressed in accordance with NCHS confidentiality standards.
2020-12-30	2020-02-01	2020-12-26	Illinois	30-49 years	Non-Hispanic White	95	3462	148	35		214	One or more data cells have counts between 1-9 and have been suppressed in accordance with NCHS confidentiality standards.
2020-12-30	2020-02-01	2020-12-26	Illinois	35-44 years	Non-Hispanic White	33	1632	61	10		89	One or more data cells have counts between 1-9 and have been suppressed in accordance with NCHS confidentiality standards.
2020-12-30	2020-02-01	2020-12-26	Illinois	45-54 years	Non-Hispanic White	147	3319	211	65		297	One or more data cells have counts between 1-9 and have been suppressed in accordance with NCHS confidentiality standards.
2020-12-30	2020-02-01	2020-12-26	Illinois	50-64 years	Non-Hispanic White	630	11076	827	325	27	1159
2020-12-30	2020-02-01	2020-12-26	Illinois	55-64 years	Non-Hispanic White	538	8987	686	282	24	966
2020-12-30	2020-02-01	2020-12-26	Illinois	65-74 years	Non-Hispanic White	1470	15325	1562	745	22	2308
2020-12-30	2020-02-01	2020-12-26	Illinois	75-84 years	Non-Hispanic White	2414	20845	2365	1178	42	3641
2020-12-30	2020-02-01	2020-12-26	Illinois	85 years and over	Non-Hispanic White	3722	30490	3092	1493	46	5366
2020-12-30	2020-02-01	2020-12-26	Illinois	Under 1 year	Non-Hispanic Black		218			0		One or more data cells have counts between 1-9 and have been suppressed in accordance with NCHS confidentiality standards.
2020-12-30	2020-02-01	2020-12-26	Illinois	0-17 years	Non-Hispanic Black		367					One or more data cells have counts between 1-9 and have been suppressed in accordance with NCHS confidentiality standards.
2020-12-30	2020-02-01	2020-12-26	Illinois	1-4 years	Non-Hispanic Black	0	38		0	0		One or more data cells have counts between 1-9 and have been suppressed in accordance with NCHS confidentiality standards.
2020-12-30	2020-02-01	2020-12-26	Illinois	5-14 years	Non-Hispanic Black	0	53		0			One or more data cells have counts between 1-9 and have been suppressed in accordance with NCHS confidentiality standards.
2020-12-30	2020-02-01	2020-12-26	Illinois	15-24 years	Non-Hispanic Black	11	503			0	14	One or more data cells have counts between 1-9 and have been suppressed in accordance with NCHS confidentiality standards.
2020-12-30	2020-02-01	2020-12-26	Illinois	18-29 years	Non-Hispanic Black	23	857	21	10	0	34
2020-12-30	2020-02-01	2020-12-26	Illinois	25-34 years	Non-Hispanic Black	42	832	32	13	0	61
2020-12-30	2020-02-01	2020-12-26	Illinois	30-49 years	Non-Hispanic Black	161	2129	128	71		219	One or more data cells have counts between 1-9 and have been suppressed in accordance with NCHS confidentiality standards.
2020-12-30	2020-02-01	2020-12-26	Illinois	35-44 years	Non-Hispanic Black	69	957	57	32		95	One or more data cells have counts between 1-9 and have been suppressed in accordance with NCHS confidentiality standards.
2020-12-30	2020-02-01	2020-12-26	Illinois	45-54 years	Non-Hispanic Black	162	1741	141	81		224	One or more data cells have counts between 1-9 and have been suppressed in accordance with NCHS confidentiality standards.
2020-12-30	2020-02-01	2020-12-26	Illinois	50-64 years	Non-Hispanic Black	534	4780	489	273		758	One or more data cells have counts between 1-9 and have been suppressed in accordance with NCHS confidentiality standards.
2020-12-30	2020-02-01	2020-12-26	Illinois	55-64 years	Non-Hispanic Black	434	3791	400	223		617	One or more data cells have counts between 1-9 and have been suppressed in accordance with NCHS confidentiality standards.
2020-12-30	2020-02-01	2020-12-26	Illinois	65-74 years	Non-Hispanic Black	721	4477	609	382		953	One or more data cells have counts between 1-9 and have been suppressed in accordance with NCHS confidentiality standards.
2020-12-30	2020-02-01	2020-12-26	Illinois	75-84 years	Non-Hispanic Black	626	3883	560	341		849	One or more data cells have counts between 1-9 and have been suppressed in accordance with NCHS confidentiality standards.
2020-12-30	2020-02-01	2020-12-26	Illinois	85 years and over	Non-Hispanic Black	519	3450	424	246		701	One or more data cells have counts between 1-9 and have been suppressed in accordance with NCHS confidentiality standards.
2020-12-30	2020-02-01	2020-12-26	Illinois	Under 1 year	Non-Hispanic American Indian or Alaska Native	0	0	0	0	0	0
2020-12-30	2020-02-01	2020-12-26	Illinois	0-17 years	Non-Hispanic American Indian or Alaska Native	0	0	0	0	0	0
2020-12-30	2020-02-01	2020-12-26	Illinois	1-4 years	Non-Hispanic American Indian or Alaska Native	0	0	0	0	0	0
2020-12-30	2020-02-01	2020-12-26	Illinois	5-14 years	Non-Hispanic American Indian or Alaska Native	0	0	0	0	0	0
2020-12-30	2020-02-01	2020-12-26	Illinois	15-24 years	Non-Hispanic American Indian or Alaska Native	0		0	0	0	0	One or more data cells have counts between 1-9 and have been suppressed in accordance with NCHS confidentiality standards.
2020-12-30	2020-02-01	2020-12-26	Illinois	18-29 years	Non-Hispanic American Indian or Alaska Native	0		0	0	0	0	One or more data cells have counts between 1-9 and have been suppressed in accordance with NCHS confidentiality standards.
2020-12-30	2020-02-01	2020-12-26	Illinois	25-34 years	Non-Hispanic American Indian or Alaska Native	0		0	0	0	0	One or more data cells have counts between 1-9 and have been suppressed in accordance with NCHS confidentiality standards.
2020-12-30	2020-02-01	2020-12-26	Illinois	30-49 years	Non-Hispanic American Indian or Alaska Native					0		One or more data cells have counts between 1-9 and have been suppressed in accordance with NCHS confidentiality standards.
2020-12-30	2020-02-01	2020-12-26	Illinois	35-44 years	Non-Hispanic American Indian or Alaska Native	0		0	0	0	0	One or more data cells have counts between 1-9 and have been suppressed in accordance with NCHS confidentiality standards.
2020-12-30	2020-02-01	2020-12-26	Illinois	45-54 years	Non-Hispanic American Indian or Alaska Native					0		One or more data cells have counts between 1-9 and have been suppressed in accordance with NCHS confidentiality standards.
2020-12-30	2020-02-01	2020-12-26	Illinois	50-64 years	Non-Hispanic American Indian or Alaska Native		19			0		One or more data cells have counts between 1-9 and have been suppressed in accordance with NCHS confidentiality standards.
2020-12-30	2020-02-01	2020-12-26	Illinois	55-64 years	Non-Hispanic American Indian or Alaska Native		14			0		One or more data cells have counts between 1-9 and have been suppressed in accordance with NCHS confidentiality standards.
2020-12-30	2020-02-01	2020-12-26	Illinois	65-74 years	Non-Hispanic American Indian or Alaska Native		10	0	0	0		One or more data cells have counts between 1-9 and have been suppressed in accordance with NCHS confidentiality standards.
2020-12-30	2020-02-01	2020-12-26	Illinois	75-84 years	Non-Hispanic American Indian or Alaska Native		21			0		One or more data cells have counts between 1-9 and have been suppressed in accordance with NCHS confidentiality standards.
2020-12-30	2020-02-01	2020-12-26	Illinois	85 years and over	Non-Hispanic American Indian or Alaska Native	0		0	0	0	0	One or more data cells have counts between 1-9 and have been suppressed in accordance with NCHS confidentiality standards.
2020-12-30	2020-02-01	2020-12-26	Illinois	Under 1 year	Non-Hispanic Asian	0	14	0	0	0	0
2020-12-30	2020-02-01	2020-12-26	Illinois	0-17 years	Non-Hispanic Asian	0	23	0	0	0	0
2020-12-30	2020-02-01	2020-12-26	Illinois	1-4 years	Non-Hispanic Asian	0		0	0	0	0	One or more data cells have counts between 1-9 and have been suppressed in accordance with NCHS confidentiality standards.
2020-12-30	2020-02-01	2020-12-26	Illinois	5-14 years	Non-Hispanic Asian	0		0	0	0	0	One or more data cells have counts between 1-9 and have been suppressed in accordance with NCHS confidentiality standards.
2020-12-30	2020-02-01	2020-12-26	Illinois	15-24 years	Non-Hispanic Asian		30		0	0		One or more data cells have counts between 1-9 and have been suppressed in accordance with NCHS confidentiality standards.
2020-12-30	2020-02-01	2020-12-26	Illinois	18-29 years	Non-Hispanic Asian		43			0		One or more data cells have counts between 1-9 and have been suppressed in accordance with NCHS confidentiality standards.
2020-12-30	2020-02-01	2020-12-26	Illinois	25-34 years	Non-Hispanic Asian		47			0		One or more data cells have counts between 1-9 and have been suppressed in accordance with NCHS confidentiality standards.
2020-12-30	2020-02-01	2020-12-26	Illinois	30-49 years	Non-Hispanic Asian	21	161	13		0	27	One or more data cells have counts between 1-9 and have been suppressed in accordance with NCHS confidentiality standards.
2020-12-30	2020-02-01	2020-12-26	Illinois	35-44 years	Non-Hispanic Asian		71			0	10	One or more data cells have counts between 1-9 and have been suppressed in accordance with NCHS confidentiality standards.
2020-12-30	2020-02-01	2020-12-26	Illinois	45-54 years	Non-Hispanic Asian	30	150	17	11	0	36
2020-12-30	2020-02-01	2020-12-26	Illinois	50-64 years	Non-Hispanic Asian	70	395	45	29		87	One or more data cells have counts between 1-9 and have been suppressed in accordance with NCHS confidentiality standards.
2020-12-30	2020-02-01	2020-12-26	Illinois	55-64 years	Non-Hispanic Asian	50	304	34	21		64	One or more data cells have counts between 1-9 and have been suppressed in accordance with NCHS confidentiality standards.
2020-12-30	2020-02-01	2020-12-26	Illinois	65-74 years	Non-Hispanic Asian	120	585	91	65		147	One or more data cells have counts between 1-9 and have been suppressed in accordance with NCHS confidentiality standards.
2020-12-30	2020-02-01	2020-12-26	Illinois	75-84 years	Non-Hispanic Asian	146	791	153	94		207	One or more data cells have counts between 1-9 and have been suppressed in accordance with NCHS confidentiality standards.
2020-12-30	2020-02-01	2020-12-26	Illinois	85 years and over	Non-Hispanic Asian	161	837	125	77		210	One or more data cells have counts between 1-9 and have been suppressed in accordance with NCHS confidentiality standards.
2020-12-30	2020-02-01	2020-12-26	Illinois	Under 1 year	Non-Hispanic Native Hawaiian or Other Pacific Islander	0	0	0	0	0	0
2020-12-30	2020-02-01	2020-12-26	Illinois	0-17 years	Non-Hispanic Native Hawaiian or Other Pacific Islander	0	0	0	0	0	0
2020-12-30	2020-02-01	2020-12-26	Illinois	1-4 years	Non-Hispanic Native Hawaiian or Other Pacific Islander	0	0	0	0	0	0
2020-12-30	2020-02-01	2020-12-26	Illinois	5-14 years	Non-Hispanic Native Hawaiian or Other Pacific Islander	0	0	0	0	0	0
2020-12-30	2020-02-01	2020-12-26	Illinois	15-24 years	Non-Hispanic Native Hawaiian or Other Pacific Islander	0	0	0	0	0	0
2020-12-30	2020-02-01	2020-12-26	Illinois	18-29 years	Non-Hispanic Native Hawaiian or Other Pacific Islander	0	0	0	0	0	0
2020-12-30	2020-02-01	2020-12-26	Illinois	25-34 years	Non-Hispanic Native Hawaiian or Other Pacific Islander	0	0	0	0	0	0
2020-12-30	2020-02-01	2020-12-26	Illinois	30-49 years	Non-Hispanic Native Hawaiian or Other Pacific Islander	0		0	0	0	0	One or more data cells have counts between 1-9 and have been suppressed in accordance with NCHS confidentiality standards.
2020-12-30	2020-02-01	2020-12-26	Illinois	35-44 years	Non-Hispanic Native Hawaiian or Other Pacific Islander	0		0	0	0	0	One or more data cells have counts between 1-9 and have been suppressed in accordance with NCHS confidentiality standards.
2020-12-30	2020-02-01	2020-12-26	Illinois	45-54 years	Non-Hispanic Native Hawaiian or Other Pacific Islander	0		0	0	0	0	One or more data cells have counts between 1-9 and have been suppressed in accordance with NCHS confidentiality standards.
2020-12-30	2020-02-01	2020-12-26	Illinois	50-64 years	Non-Hispanic Native Hawaiian or Other Pacific Islander					0		One or more data cells have counts between 1-9 and have been suppressed in accordance with NCHS confidentiality standards.
2020-12-30	2020-02-01	2020-12-26	Illinois	55-64 years	Non-Hispanic Native Hawaiian or Other Pacific Islander					0		One or more data cells have counts between 1-9 and have been suppressed in accordance with NCHS confidentiality standards.
2020-12-30	2020-02-01	2020-12-26	Illinois	65-74 years	Non-Hispanic Native Hawaiian or Other Pacific Islander					0		One or more data cells have counts between 1-9 and have been suppressed in accordance with NCHS confidentiality standards.
2020-12-30	2020-02-01	2020-12-26	Illinois	75-84 years	Non-Hispanic Native Hawaiian or Other Pacific Islander					0		One or more data cells have counts between 1-9 and have been suppressed in accordance with NCHS confidentiality standards.
2020-12-30	2020-02-01	2020-12-26	Illinois	85 years and over	Non-Hispanic Native Hawaiian or Other Pacific Islander	0		0	0	0	0	One or more data cells have counts between 1-9 and have been suppressed in accordance with NCHS confidentiality standards.
2020-12-30	2020-02-01	2020-12-26	Illinois	Under 1 year	Non-Hispanic More than one race	0	17	0	0	0	0
2020-12-30	2020-02-01	2020-12-26	Illinois	0-17 years	Non-Hispanic More than one race	0	26	0	0	0	0
2020-12-30	2020-02-01	2020-12-26	Illinois	1-4 years	Non-Hispanic More than one race	0		0	0	0	0	One or more data cells have counts between 1-9 and have been suppressed in accordance with NCHS confidentiality standards.
2020-12-30	2020-02-01	2020-12-26	Illinois	5-14 years	Non-Hispanic More than one race	0		0	0	0	0	One or more data cells have counts between 1-9 and have been suppressed in accordance with NCHS confidentiality standards.
2020-12-30	2020-02-01	2020-12-26	Illinois	15-24 years	Non-Hispanic More than one race		19	0	0	0		One or more data cells have counts between 1-9 and have been suppressed in accordance with NCHS confidentiality standards.
2020-12-30	2020-02-01	2020-12-26	Illinois	18-29 years	Non-Hispanic More than one race		30	0	0	0		One or more data cells have counts between 1-9 and have been suppressed in accordance with NCHS confidentiality standards.
2020-12-30	2020-02-01	2020-12-26	Illinois	25-34 years	Non-Hispanic More than one race		19	0	0	0		One or more data cells have counts between 1-9 and have been suppressed in accordance with NCHS confidentiality standards.
2020-12-30	2020-02-01	2020-12-26	Illinois	30-49 years	Non-Hispanic More than one race		24	0	0	0		One or more data cells have counts between 1-9 and have been suppressed in accordance with NCHS confidentiality standards.
2020-12-30	2020-02-01	2020-12-26	Illinois	35-44 years	Non-Hispanic More than one race	0	11	0	0	0	0
2020-12-30	2020-02-01	2020-12-26	Illinois	45-54 years	Non-Hispanic More than one race		21	0	0	0		One or more data cells have counts between 1-9 and have been suppressed in accordance with NCHS confidentiality standards.
2020-12-30	2020-02-01	2020-12-26	Illinois	50-64 years	Non-Hispanic More than one race		48			0		One or more data cells have counts between 1-9 and have been suppressed in accordance with NCHS confidentiality standards.
2020-12-30	2020-02-01	2020-12-26	Illinois	55-64 years	Non-Hispanic More than one race		36			0		One or more data cells have counts between 1-9 and have been suppressed in accordance with NCHS confidentiality standards.
2020-12-30	2020-02-01	2020-12-26	Illinois	65-74 years	Non-Hispanic More than one race		53			0		One or more data cells have counts between 1-9 and have been suppressed in accordance with NCHS confidentiality standards.
2020-12-30	2020-02-01	2020-12-26	Illinois	75-84 years	Non-Hispanic More than one race		51			0		One or more data cells have counts between 1-9 and have been suppressed in accordance with NCHS confidentiality standards.
2020-12-30	2020-02-01	2020-12-26	Illinois	85 years and over	Non-Hispanic More than one race	11	62	10		0	14	One or more data cells have counts between 1-9 and have been suppressed in accordance with NCHS confidentiality standards.
2020-12-30	2020-02-01	2020-12-26	Illinois	Under 1 year	Hispanic	0	134		0	0		One or more data cells have counts between 1-9 and have been suppressed in accordance with NCHS confidentiality standards.
2020-12-30	2020-02-01	2020-12-26	Illinois	0-17 years	Hispanic		230					One or more data cells have counts between 1-9 and have been suppressed in accordance with NCHS confidentiality standards.
2020-12-30	2020-02-01	2020-12-26	Illinois	1-4 years	Hispanic	0	19	0	0			One or more data cells have counts between 1-9 and have been suppressed in accordance with NCHS confidentiality standards.
2020-12-30	2020-02-01	2020-12-26	Illinois	5-14 years	Hispanic		35					One or more data cells have counts between 1-9 and have been suppressed in accordance with NCHS confidentiality standards.
2020-12-30	2020-02-01	2020-12-26	Illinois	15-24 years	Hispanic		236				10	One or more data cells have counts between 1-9 and have been suppressed in accordance with NCHS confidentiality standards.
2020-12-30	2020-02-01	2020-12-26	Illinois	18-29 years	Hispanic	23	376	15			32	One or more data cells have counts between 1-9 and have been suppressed in accordance with NCHS confidentiality standards.
2020-12-30	2020-02-01	2020-12-26	Illinois	25-34 years	Hispanic	40	336	23	17		48	One or more data cells have counts between 1-9 and have been suppressed in accordance with NCHS confidentiality standards.
2020-12-30	2020-02-01	2020-12-26	Illinois	30-49 years	Hispanic	292	1157	156	128		321	One or more data cells have counts between 1-9 and have been suppressed in accordance with NCHS confidentiality standards.
2020-12-30	2020-02-01	2020-12-26	Illinois	35-44 years	Hispanic	140	579	76	60		157	One or more data cells have counts between 1-9 and have been suppressed in accordance with NCHS confidentiality standards.
2020-12-30	2020-02-01	2020-12-26	Illinois	45-54 years	Hispanic	311	936	170	145	0	336
2020-12-30	2020-02-01	2020-12-26	Illinois	50-64 years	Hispanic	704	1973	438	374		769	One or more data cells have counts between 1-9 and have been suppressed in accordance with NCHS confidentiality standards.
2020-12-30	2020-02-01	2020-12-26	Illinois	55-64 years	Hispanic	521	1461	337	288		571	One or more data cells have counts between 1-9 and have been suppressed in accordance with NCHS confidentiality standards.
2020-12-30	2020-02-01	2020-12-26	Illinois	65-74 years	Hispanic	582	1631	383	340		628	One or more data cells have counts between 1-9 and have been suppressed in accordance with NCHS confidentiality standards.
2020-12-30	2020-02-01	2020-12-26	Illinois	75-84 years	Hispanic	470	1603	363	277	0	556
2020-12-30	2020-02-01	2020-12-26	Illinois	85 years and over	Hispanic	349	1473	272	189		435	One or more data cells have counts between 1-9 and have been suppressed in accordance with NCHS confidentiality standards.
2020-12-30	2020-02-01	2020-12-26	Illinois	Under 1 year	Unknown	0		0	0	0	0	One or more data cells have counts between 1-9 and have been suppressed in accordance with NCHS confidentiality standards.
2020-12-30	2020-02-01	2020-12-26	Illinois	0-17 years	Unknown	0		0	0	0	0	One or more data cells have counts between 1-9 and have been suppressed in accordance with NCHS confidentiality standards.
2020-12-30	2020-02-01	2020-12-26	Illinois	1-4 years	Unknown	0	0	0	0	0	0
2020-12-30	2020-02-01	2020-12-26	Illinois	5-14 years	Unknown	0	0	0	0	0	0
2020-12-30	2020-02-01	2020-12-26	Illinois	15-24 years	Unknown	0		0	0	0	0	One or more data cells have counts between 1-9 and have been suppressed in accordance with NCHS confidentiality standards.
2020-12-30	2020-02-01	2020-12-26	Illinois	18-29 years	Unknown	0		0	0	0	0	One or more data cells have counts between 1-9 and have been suppressed in accordance with NCHS confidentiality standards.
2020-12-30	2020-02-01	2020-12-26	Illinois	25-34 years	Unknown	0		0	0	0	0	One or more data cells have counts between 1-9 and have been suppressed in accordance with NCHS confidentiality standards.
2020-12-30	2020-02-01	2020-12-26	Illinois	30-49 years	Unknown		20			0		One or more data cells have counts between 1-9 and have been suppressed in accordance with NCHS confidentiality standards.
2020-12-30	2020-02-01	2020-12-26	Illinois	35-44 years	Unknown		11			0		One or more data cells have counts between 1-9 and have been suppressed in accordance with NCHS confidentiality standards.
2020-12-30	2020-02-01	2020-12-26	Illinois	45-54 years	Unknown		21		0	0		One or more data cells have counts between 1-9 and have been suppressed in accordance with NCHS confidentiality standards.
2020-12-30	2020-02-01	2020-12-26	Illinois	50-64 years	Unknown		69			0	12	One or more data cells have counts between 1-9 and have been suppressed in accordance with NCHS confidentiality standards.
2020-12-30	2020-02-01	2020-12-26	Illinois	55-64 years	Unknown		55			0	11	One or more data cells have counts between 1-9 and have been suppressed in accordance with NCHS confidentiality standards.
2020-12-30	2020-02-01	2020-12-26	Illinois	65-74 years	Unknown	23	96	14	11	0	26
2020-12-30	2020-02-01	2020-12-26	Illinois	75-84 years	Unknown	16	37	10		0	17	One or more data cells have counts between 1-9 and have been suppressed in accordance with NCHS confidentiality standards.
2020-12-30	2020-02-01	2020-12-26	Illinois	85 years and over	Unknown		10			0		One or more data cells have counts between 1-9 and have been suppressed in accordance with NCHS confidentiality standards.
2020-12-30	2020-02-01	2020-12-26	Indiana	Under 1 year	Non-Hispanic White		243		0	0		One or more data cells have counts between 1-9 and have been suppressed in accordance with NCHS confidentiality standards.
2020-12-30	2020-02-01	2020-12-26	Indiana	0-17 years	Non-Hispanic White		417		0			One or more data cells have counts between 1-9 and have been suppressed in accordance with NCHS confidentiality standards.
2020-12-30	2020-02-01	2020-12-26	Indiana	1-4 years	Non-Hispanic White		42	0	0			One or more data cells have counts between 1-9 and have been suppressed in accordance with NCHS confidentiality standards.
2020-12-30	2020-02-01	2020-12-26	Indiana	5-14 years	Non-Hispanic White	0	72	0	0			One or more data cells have counts between 1-9 and have been suppressed in accordance with NCHS confidentiality standards.
2020-12-30	2020-02-01	2020-12-26	Indiana	15-24 years	Non-Hispanic White		452		0	0		One or more data cells have counts between 1-9 and have been suppressed in accordance with NCHS confidentiality standards.
2020-12-30	2020-02-01	2020-12-26	Indiana	18-29 years	Non-Hispanic White		857		0	0	13	One or more data cells have counts between 1-9 and have been suppressed in accordance with NCHS confidentiality standards.
2020-12-30	2020-02-01	2020-12-26	Indiana	25-34 years	Non-Hispanic White	10	1070	16			24	One or more data cells have counts between 1-9 and have been suppressed in accordance with NCHS confidentiality standards.
2020-12-30	2020-02-01	2020-12-26	Indiana	30-49 years	Non-Hispanic White	83	3241	152	39		205	One or more data cells have counts between 1-9 and have been suppressed in accordance with NCHS confidentiality standards.
2020-12-30	2020-02-01	2020-12-26	Indiana	35-44 years	Non-Hispanic White	36	1466	69	16		91	One or more data cells have counts between 1-9 and have been suppressed in accordance with NCHS confidentiality standards.
2020-12-30	2020-02-01	2020-12-26	Indiana	45-54 years	Non-Hispanic White	104	2948	206	55	12	267
2020-12-30	2020-02-01	2020-12-26	Indiana	50-64 years	Non-Hispanic White	535	9271	825	282	25	1103
2020-12-30	2020-02-01	2020-12-26	Indiana	55-64 years	Non-Hispanic White	471	7493	690	247	19	933
2020-12-30	2020-02-01	2020-12-26	Indiana	65-74 years	Non-Hispanic White	1151	11892	1386	612	24	1948
2020-12-30	2020-02-01	2020-12-26	Indiana	75-84 years	Non-Hispanic White	1896	15245	1886	915	31	2896
2020-12-30	2020-02-01	2020-12-26	Indiana	85 years and over	Non-Hispanic White	2483	18426	1850	893	35	3474
2020-12-30	2020-02-01	2020-12-26	Indiana	Under 1 year	Non-Hispanic Black	0	111		0	0		One or more data cells have counts between 1-9 and have been suppressed in accordance with NCHS confidentiality standards.
2020-12-30	2020-02-01	2020-12-26	Indiana	0-17 years	Non-Hispanic Black		171		0	0		One or more data cells have counts between 1-9 and have been suppressed in accordance with NCHS confidentiality standards.
2020-12-30	2020-02-01	2020-12-26	Indiana	1-4 years	Non-Hispanic Black	0		0	0	0	0	One or more data cells have counts between 1-9 and have been suppressed in accordance with NCHS confidentiality standards.
2020-12-30	2020-02-01	2020-12-26	Indiana	5-14 years	Non-Hispanic Black	0	30	0	0	0	0
2020-12-30	2020-02-01	2020-12-26	Indiana	15-24 years	Non-Hispanic Black		201		0	0		One or more data cells have counts between 1-9 and have been suppressed in accordance with NCHS confidentiality standards.
2020-12-30	2020-02-01	2020-12-26	Indiana	18-29 years	Non-Hispanic Black		321			0	11	One or more data cells have counts between 1-9 and have been suppressed in accordance with NCHS confidentiality standards.
2020-12-30	2020-02-01	2020-12-26	Indiana	25-34 years	Non-Hispanic Black		281	10		0	14	One or more data cells have counts between 1-9 and have been suppressed in accordance with NCHS confidentiality standards.
2020-12-30	2020-02-01	2020-12-26	Indiana	30-49 years	Non-Hispanic Black	47	705	47	25	0	69
2020-12-30	2020-02-01	2020-12-26	Indiana	35-44 years	Non-Hispanic Black	17	311	19	12	0	24
2020-12-30	2020-02-01	2020-12-26	Indiana	45-54 years	Non-Hispanic Black	58	541	57	30	0	85
2020-12-30	2020-02-01	2020-12-26	Indiana	50-64 years	Non-Hispanic Black	171	1439	168	97		245	One or more data cells have counts between 1-9 and have been suppressed in accordance with NCHS confidentiality standards.
2020-12-30	2020-02-01	2020-12-26	Indiana	55-64 years	Non-Hispanic Black	137	1153	136	78		198	One or more data cells have counts between 1-9 and have been suppressed in accordance with NCHS confidentiality standards.
2020-12-30	2020-02-01	2020-12-26	Indiana	65-74 years	Non-Hispanic Black	224	1433	183	110		298	One or more data cells have counts between 1-9 and have been suppressed in accordance with NCHS confidentiality standards.
2020-12-30	2020-02-01	2020-12-26	Indiana	75-84 years	Non-Hispanic Black	214	1217	189	110	0	293
2020-12-30	2020-02-01	2020-12-26	Indiana	85 years and over	Non-Hispanic Black	198	1107	132	73		258	One or more data cells have counts between 1-9 and have been suppressed in accordance with NCHS confidentiality standards.
2020-12-30	2020-02-01	2020-12-26	Indiana	Under 1 year	Non-Hispanic American Indian or Alaska Native	0		0	0	0	0	One or more data cells have counts between 1-9 and have been suppressed in accordance with NCHS confidentiality standards.
2020-12-30	2020-02-01	2020-12-26	Indiana	0-17 years	Non-Hispanic American Indian or Alaska Native	0		0	0	0	0	One or more data cells have counts between 1-9 and have been suppressed in accordance with NCHS confidentiality standards.
2020-12-30	2020-02-01	2020-12-26	Indiana	1-4 years	Non-Hispanic American Indian or Alaska Native	0	0	0	0	0	0
2020-12-30	2020-02-01	2020-12-26	Indiana	5-14 years	Non-Hispanic American Indian or Alaska Native	0	0	0	0	0	0
2020-12-30	2020-02-01	2020-12-26	Indiana	15-24 years	Non-Hispanic American Indian or Alaska Native	0	0	0	0	0	0
2020-12-30	2020-02-01	2020-12-26	Indiana	18-29 years	Non-Hispanic American Indian or Alaska Native	0		0	0	0	0	One or more data cells have counts between 1-9 and have been suppressed in accordance with NCHS confidentiality standards.
2020-12-30	2020-02-01	2020-12-26	Indiana	25-34 years	Non-Hispanic American Indian or Alaska Native	0		0	0	0	0	One or more data cells have counts between 1-9 and have been suppressed in accordance with NCHS confidentiality standards.
2020-12-30	2020-02-01	2020-12-26	Indiana	30-49 years	Non-Hispanic American Indian or Alaska Native		12	0	0	0		One or more data cells have counts between 1-9 and have been suppressed in accordance with NCHS confidentiality standards.
2020-12-30	2020-02-01	2020-12-26	Indiana	35-44 years	Non-Hispanic American Indian or Alaska Native	0		0	0	0	0	One or more data cells have counts between 1-9 and have been suppressed in accordance with NCHS confidentiality standards.
2020-12-30	2020-02-01	2020-12-26	Indiana	45-54 years	Non-Hispanic American Indian or Alaska Native			0	0	0		One or more data cells have counts between 1-9 and have been suppressed in accordance with NCHS confidentiality standards.
2020-12-30	2020-02-01	2020-12-26	Indiana	50-64 years	Non-Hispanic American Indian or Alaska Native	0		0	0	0	0	One or more data cells have counts between 1-9 and have been suppressed in accordance with NCHS confidentiality standards.
2020-12-30	2020-02-01	2020-12-26	Indiana	55-64 years	Non-Hispanic American Indian or Alaska Native	0		0	0	0	0	One or more data cells have counts between 1-9 and have been suppressed in accordance with NCHS confidentiality standards.
2020-12-30	2020-02-01	2020-12-26	Indiana	65-74 years	Non-Hispanic American Indian or Alaska Native		13					One or more data cells have counts between 1-9 and have been suppressed in accordance with NCHS confidentiality standards.
2020-12-30	2020-02-01	2020-12-26	Indiana	75-84 years	Non-Hispanic American Indian or Alaska Native	0	11		0	0		One or more data cells have counts between 1-9 and have been suppressed in accordance with NCHS confidentiality standards.
2020-12-30	2020-02-01	2020-12-26	Indiana	85 years and over	Non-Hispanic American Indian or Alaska Native					0		One or more data cells have counts between 1-9 and have been suppressed in accordance with NCHS confidentiality standards.
2020-12-30	2020-02-01	2020-12-26	Indiana	Under 1 year	Non-Hispanic Asian	0		0	0	0	0	One or more data cells have counts between 1-9 and have been suppressed in accordance with NCHS confidentiality standards.
2020-12-30	2020-02-01	2020-12-26	Indiana	0-17 years	Non-Hispanic Asian	0	10	0	0	0	0
2020-12-30	2020-02-01	2020-12-26	Indiana	1-4 years	Non-Hispanic Asian	0		0	0	0	0	One or more data cells have counts between 1-9 and have been suppressed in accordance with NCHS confidentiality standards.
2020-12-30	2020-02-01	2020-12-26	Indiana	5-14 years	Non-Hispanic Asian	0		0	0	0	0	One or more data cells have counts between 1-9 and have been suppressed in accordance with NCHS confidentiality standards.
2020-12-30	2020-02-01	2020-12-26	Indiana	15-24 years	Non-Hispanic Asian	0	11		0	0		One or more data cells have counts between 1-9 and have been suppressed in accordance with NCHS confidentiality standards.
2020-12-30	2020-02-01	2020-12-26	Indiana	18-29 years	Non-Hispanic Asian	0	18		0	0		One or more data cells have counts between 1-9 and have been suppressed in accordance with NCHS confidentiality standards.
2020-12-30	2020-02-01	2020-12-26	Indiana	25-34 years	Non-Hispanic Asian	0	13	0	0	0	0
2020-12-30	2020-02-01	2020-12-26	Indiana	30-49 years	Non-Hispanic Asian		36			0		One or more data cells have counts between 1-9 and have been suppressed in accordance with NCHS confidentiality standards.
2020-12-30	2020-02-01	2020-12-26	Indiana	35-44 years	Non-Hispanic Asian		22			0		One or more data cells have counts between 1-9 and have been suppressed in accordance with NCHS confidentiality standards.
2020-12-30	2020-02-01	2020-12-26	Indiana	45-54 years	Non-Hispanic Asian		27			0		One or more data cells have counts between 1-9 and have been suppressed in accordance with NCHS confidentiality standards.
2020-12-30	2020-02-01	2020-12-26	Indiana	50-64 years	Non-Hispanic Asian	11	64	10			16	One or more data cells have counts between 1-9 and have been suppressed in accordance with NCHS confidentiality standards.
2020-12-30	2020-02-01	2020-12-26	Indiana	55-64 years	Non-Hispanic Asian	10	45				14	One or more data cells have counts between 1-9 and have been suppressed in accordance with NCHS confidentiality standards.
2020-12-30	2020-02-01	2020-12-26	Indiana	65-74 years	Non-Hispanic Asian		64				13	One or more data cells have counts between 1-9 and have been suppressed in accordance with NCHS confidentiality standards.
2020-12-30	2020-02-01	2020-12-26	Indiana	75-84 years	Non-Hispanic Asian	22	97	15	11	0	26
2020-12-30	2020-02-01	2020-12-26	Indiana	85 years and over	Non-Hispanic Asian	19	97	13		0	25	One or more data cells have counts between 1-9 and have been suppressed in accordance with NCHS confidentiality standards.
2020-12-30	2020-02-01	2020-12-26	Indiana	Under 1 year	Non-Hispanic Native Hawaiian or Other Pacific Islander	0		0	0	0	0	One or more data cells have counts between 1-9 and have been suppressed in accordance with NCHS confidentiality standards.
2020-12-30	2020-02-01	2020-12-26	Indiana	0-17 years	Non-Hispanic Native Hawaiian or Other Pacific Islander	0		0	0	0	0	One or more data cells have counts between 1-9 and have been suppressed in accordance with NCHS confidentiality standards.
2020-12-30	2020-02-01	2020-12-26	Indiana	1-4 years	Non-Hispanic Native Hawaiian or Other Pacific Islander	0		0	0	0	0	One or more data cells have counts between 1-9 and have been suppressed in accordance with NCHS confidentiality standards.
2020-12-30	2020-02-01	2020-12-26	Indiana	5-14 years	Non-Hispanic Native Hawaiian or Other Pacific Islander	0	0	0	0	0	0
2020-12-30	2020-02-01	2020-12-26	Indiana	15-24 years	Non-Hispanic Native Hawaiian or Other Pacific Islander	0	0	0	0	0	0
2020-12-30	2020-02-01	2020-12-26	Indiana	18-29 years	Non-Hispanic Native Hawaiian or Other Pacific Islander	0		0	0	0	0	One or more data cells have counts between 1-9 and have been suppressed in accordance with NCHS confidentiality standards.
2020-12-30	2020-02-01	2020-12-26	Indiana	25-34 years	Non-Hispanic Native Hawaiian or Other Pacific Islander	0		0	0	0	0	One or more data cells have counts between 1-9 and have been suppressed in accordance with NCHS confidentiality standards.
2020-12-30	2020-02-01	2020-12-26	Indiana	30-49 years	Non-Hispanic Native Hawaiian or Other Pacific Islander					0		One or more data cells have counts between 1-9 and have been suppressed in accordance with NCHS confidentiality standards.
2020-12-30	2020-02-01	2020-12-26	Indiana	35-44 years	Non-Hispanic Native Hawaiian or Other Pacific Islander					0		One or more data cells have counts between 1-9 and have been suppressed in accordance with NCHS confidentiality standards.
2020-12-30	2020-02-01	2020-12-26	Indiana	45-54 years	Non-Hispanic Native Hawaiian or Other Pacific Islander	0		0	0	0	0	One or more data cells have counts between 1-9 and have been suppressed in accordance with NCHS confidentiality standards.
2020-12-30	2020-02-01	2020-12-26	Indiana	50-64 years	Non-Hispanic Native Hawaiian or Other Pacific Islander	0			0	0		One or more data cells have counts between 1-9 and have been suppressed in accordance with NCHS confidentiality standards.
2020-12-30	2020-02-01	2020-12-26	Indiana	55-64 years	Non-Hispanic Native Hawaiian or Other Pacific Islander	0			0	0		One or more data cells have counts between 1-9 and have been suppressed in accordance with NCHS confidentiality standards.
2020-12-30	2020-02-01	2020-12-26	Indiana	65-74 years	Non-Hispanic Native Hawaiian or Other Pacific Islander					0		One or more data cells have counts between 1-9 and have been suppressed in accordance with NCHS confidentiality standards.
2020-12-30	2020-02-01	2020-12-26	Indiana	75-84 years	Non-Hispanic Native Hawaiian or Other Pacific Islander			0	0	0		One or more data cells have counts between 1-9 and have been suppressed in accordance with NCHS confidentiality standards.
2020-12-30	2020-02-01	2020-12-26	Indiana	85 years and over	Non-Hispanic Native Hawaiian or Other Pacific Islander					0		One or more data cells have counts between 1-9 and have been suppressed in accordance with NCHS confidentiality standards.
2020-12-30	2020-02-01	2020-12-26	Indiana	Under 1 year	Non-Hispanic More than one race	0		0	0	0	0	One or more data cells have counts between 1-9 and have been suppressed in accordance with NCHS confidentiality standards.
2020-12-30	2020-02-01	2020-12-26	Indiana	0-17 years	Non-Hispanic More than one race	0	18	0	0	0	0
2020-12-30	2020-02-01	2020-12-26	Indiana	1-4 years	Non-Hispanic More than one race	0		0	0	0	0	One or more data cells have counts between 1-9 and have been suppressed in accordance with NCHS confidentiality standards.
2020-12-30	2020-02-01	2020-12-26	Indiana	5-14 years	Non-Hispanic More than one race	0		0	0	0	0	One or more data cells have counts between 1-9 and have been suppressed in accordance with NCHS confidentiality standards.
2020-12-30	2020-02-01	2020-12-26	Indiana	15-24 years	Non-Hispanic More than one race	0		0	0	0	0	One or more data cells have counts between 1-9 and have been suppressed in accordance with NCHS confidentiality standards.
2020-12-30	2020-02-01	2020-12-26	Indiana	18-29 years	Non-Hispanic More than one race	0		0	0	0	0	One or more data cells have counts between 1-9 and have been suppressed in accordance with NCHS confidentiality standards.
2020-12-30	2020-02-01	2020-12-26	Indiana	25-34 years	Non-Hispanic More than one race		15		0	0		One or more data cells have counts between 1-9 and have been suppressed in accordance with NCHS confidentiality standards.
2020-12-30	2020-02-01	2020-12-26	Indiana	30-49 years	Non-Hispanic More than one race		18		0	0		One or more data cells have counts between 1-9 and have been suppressed in accordance with NCHS confidentiality standards.
2020-12-30	2020-02-01	2020-12-26	Indiana	35-44 years	Non-Hispanic More than one race	0		0	0	0	0	One or more data cells have counts between 1-9 and have been suppressed in accordance with NCHS confidentiality standards.
2020-12-30	2020-02-01	2020-12-26	Indiana	45-54 years	Non-Hispanic More than one race		10			0		One or more data cells have counts between 1-9 and have been suppressed in accordance with NCHS confidentiality standards.
2020-12-30	2020-02-01	2020-12-26	Indiana	50-64 years	Non-Hispanic More than one race		20			0		One or more data cells have counts between 1-9 and have been suppressed in accordance with NCHS confidentiality standards.
2020-12-30	2020-02-01	2020-12-26	Indiana	55-64 years	Non-Hispanic More than one race		13			0		One or more data cells have counts between 1-9 and have been suppressed in accordance with NCHS confidentiality standards.
2020-12-30	2020-02-01	2020-12-26	Indiana	65-74 years	Non-Hispanic More than one race		11			0		One or more data cells have counts between 1-9 and have been suppressed in accordance with NCHS confidentiality standards.
2020-12-30	2020-02-01	2020-12-26	Indiana	75-84 years	Non-Hispanic More than one race					0		One or more data cells have counts between 1-9 and have been suppressed in accordance with NCHS confidentiality standards.
2020-12-30	2020-02-01	2020-12-26	Indiana	85 years and over	Non-Hispanic More than one race		12			0		One or more data cells have counts between 1-9 and have been suppressed in accordance with NCHS confidentiality standards.
2020-12-30	2020-02-01	2020-12-26	Indiana	Under 1 year	Hispanic	0	34	0	0	0	0
2020-12-30	2020-02-01	2020-12-26	Indiana	0-17 years	Hispanic	0	64	0	0	0	0
2020-12-30	2020-02-01	2020-12-26	Indiana	1-4 years	Hispanic	0		0	0	0	0	One or more data cells have counts between 1-9 and have been suppressed in accordance with NCHS confidentiality standards.
2020-12-30	2020-02-01	2020-12-26	Indiana	5-14 years	Hispanic	0	10	0	0	0	0
2020-12-30	2020-02-01	2020-12-26	Indiana	15-24 years	Hispanic	0	60	0	0	0	0
2020-12-30	2020-02-01	2020-12-26	Indiana	18-29 years	Hispanic		90		0	0		One or more data cells have counts between 1-9 and have been suppressed in accordance with NCHS confidentiality standards.
2020-12-30	2020-02-01	2020-12-26	Indiana	25-34 years	Hispanic		91			0		One or more data cells have counts between 1-9 and have been suppressed in accordance with NCHS confidentiality standards.
2020-12-30	2020-02-01	2020-12-26	Indiana	30-49 years	Hispanic	28	224	24	16	0	36
2020-12-30	2020-02-01	2020-12-26	Indiana	35-44 years	Hispanic	11	102			0	13	One or more data cells have counts between 1-9 and have been suppressed in accordance with NCHS confidentiality standards.
2020-12-30	2020-02-01	2020-12-26	Indiana	45-54 years	Hispanic	36	147	24	20	0	40
2020-12-30	2020-02-01	2020-12-26	Indiana	50-64 years	Hispanic	94	326	66	56		104	One or more data cells have counts between 1-9 and have been suppressed in accordance with NCHS confidentiality standards.
2020-12-30	2020-02-01	2020-12-26	Indiana	55-64 years	Hispanic	74	252	55	46		83	One or more data cells have counts between 1-9 and have been suppressed in accordance with NCHS confidentiality standards.
2020-12-30	2020-02-01	2020-12-26	Indiana	65-74 years	Hispanic	80	291	56	47		91	One or more data cells have counts between 1-9 and have been suppressed in accordance with NCHS confidentiality standards.
2020-12-30	2020-02-01	2020-12-26	Indiana	75-84 years	Hispanic	38	222	35	19		55	One or more data cells have counts between 1-9 and have been suppressed in accordance with NCHS confidentiality standards.
2020-12-30	2020-02-01	2020-12-26	Indiana	85 years and over	Hispanic	49	260	38	25	0	62
2020-12-30	2020-02-01	2020-12-26	Indiana	Under 1 year	Unknown	0		0	0	0	0	One or more data cells have counts between 1-9 and have been suppressed in accordance with NCHS confidentiality standards.
2020-12-30	2020-02-01	2020-12-26	Indiana	0-17 years	Unknown	0		0	0	0	0	One or more data cells have counts between 1-9 and have been suppressed in accordance with NCHS confidentiality standards.
2020-12-30	2020-02-01	2020-12-26	Indiana	1-4 years	Unknown	0	0	0	0	0	0
2020-12-30	2020-02-01	2020-12-26	Indiana	5-14 years	Unknown	0	0	0	0	0	0
2020-12-30	2020-02-01	2020-12-26	Indiana	15-24 years	Unknown	0		0	0	0	0	One or more data cells have counts between 1-9 and have been suppressed in accordance with NCHS confidentiality standards.
2020-12-30	2020-02-01	2020-12-26	Indiana	18-29 years	Unknown	0		0	0	0	0	One or more data cells have counts between 1-9 and have been suppressed in accordance with NCHS confidentiality standards.
2020-12-30	2020-02-01	2020-12-26	Indiana	25-34 years	Unknown	0		0	0	0	0	One or more data cells have counts between 1-9 and have been suppressed in accordance with NCHS confidentiality standards.
2020-12-30	2020-02-01	2020-12-26	Indiana	30-49 years	Unknown				0	0		One or more data cells have counts between 1-9 and have been suppressed in accordance with NCHS confidentiality standards.
2020-12-30	2020-02-01	2020-12-26	Indiana	35-44 years	Unknown				0	0		One or more data cells have counts between 1-9 and have been suppressed in accordance with NCHS confidentiality standards.
2020-12-30	2020-02-01	2020-12-26	Indiana	45-54 years	Unknown	0	0	0	0	0	0
2020-12-30	2020-02-01	2020-12-26	Indiana	50-64 years	Unknown	0		0	0	0	0	One or more data cells have counts between 1-9 and have been suppressed in accordance with NCHS confidentiality standards.
2020-12-30	2020-02-01	2020-12-26	Indiana	55-64 years	Unknown	0		0	0	0	0	One or more data cells have counts between 1-9 and have been suppressed in accordance with NCHS confidentiality standards.
2020-12-30	2020-02-01	2020-12-26	Indiana	65-74 years	Unknown	0		0	0	0	0	One or more data cells have counts between 1-9 and have been suppressed in accordance with NCHS confidentiality standards.
2020-12-30	2020-02-01	2020-12-26	Indiana	75-84 years	Unknown	0		0	0	0	0	One or more data cells have counts between 1-9 and have been suppressed in accordance with NCHS confidentiality standards.
2020-12-30	2020-02-01	2020-12-26	Indiana	85 years and over	Unknown	0	0	0	0	0	0
2020-12-30	2020-02-01	2020-12-26	Iowa	Under 1 year	Non-Hispanic White	0	79		0			One or more data cells have counts between 1-9 and have been suppressed in accordance with NCHS confidentiality standards.
2020-12-30	2020-02-01	2020-12-26	Iowa	0-17 years	Non-Hispanic White	0	157		0			One or more data cells have counts between 1-9 and have been suppressed in accordance with NCHS confidentiality standards.
2020-12-30	2020-02-01	2020-12-26	Iowa	1-4 years	Non-Hispanic White	0	20	0	0			One or more data cells have counts between 1-9 and have been suppressed in accordance with NCHS confidentiality standards.
2020-12-30	2020-02-01	2020-12-26	Iowa	5-14 years	Non-Hispanic White	0	32		0	0		One or more data cells have counts between 1-9 and have been suppressed in accordance with NCHS confidentiality standards.
2020-12-30	2020-02-01	2020-12-26	Iowa	15-24 years	Non-Hispanic White		176					One or more data cells have counts between 1-9 and have been suppressed in accordance with NCHS confidentiality standards.
2020-12-30	2020-02-01	2020-12-26	Iowa	18-29 years	Non-Hispanic White		276				10	One or more data cells have counts between 1-9 and have been suppressed in accordance with NCHS confidentiality standards.
2020-12-30	2020-02-01	2020-12-26	Iowa	25-34 years	Non-Hispanic White		320	12			15	One or more data cells have counts between 1-9 and have been suppressed in accordance with NCHS confidentiality standards.
2020-12-30	2020-02-01	2020-12-26	Iowa	30-49 years	Non-Hispanic White	49	1178	46	18		78	One or more data cells have counts between 1-9 and have been suppressed in accordance with NCHS confidentiality standards.
2020-12-30	2020-02-01	2020-12-26	Iowa	35-44 years	Non-Hispanic White	26	556	21		0	41	One or more data cells have counts between 1-9 and have been suppressed in accordance with NCHS confidentiality standards.
2020-12-30	2020-02-01	2020-12-26	Iowa	45-54 years	Non-Hispanic White	66	1172	67	30		105	One or more data cells have counts between 1-9 and have been suppressed in accordance with NCHS confidentiality standards.
2020-12-30	2020-02-01	2020-12-26	Iowa	50-64 years	Non-Hispanic White	300	3902	280	118		469	One or more data cells have counts between 1-9 and have been suppressed in accordance with NCHS confidentiality standards.
2020-12-30	2020-02-01	2020-12-26	Iowa	55-64 years	Non-Hispanic White	253	3158	230	97		391	One or more data cells have counts between 1-9 and have been suppressed in accordance with NCHS confidentiality standards.
2020-12-30	2020-02-01	2020-12-26	Iowa	65-74 years	Non-Hispanic White	591	5486	529	242	20	898
2020-12-30	2020-02-01	2020-12-26	Iowa	75-84 years	Non-Hispanic White	1040	7279	748	345	20	1463
2020-12-30	2020-02-01	2020-12-26	Iowa	85 years and over	Non-Hispanic White	1610	11203	1017	453	31	2205
2020-12-30	2020-02-01	2020-12-26	Iowa	Under 1 year	Non-Hispanic Black	0	19		0	0		One or more data cells have counts between 1-9 and have been suppressed in accordance with NCHS confidentiality standards.
2020-12-30	2020-02-01	2020-12-26	Iowa	0-17 years	Non-Hispanic Black	0	39		0	0		One or more data cells have counts between 1-9 and have been suppressed in accordance with NCHS confidentiality standards.
2020-12-30	2020-02-01	2020-12-26	Iowa	1-4 years	Non-Hispanic Black	0		0	0	0	0	One or more data cells have counts between 1-9 and have been suppressed in accordance with NCHS confidentiality standards.
2020-12-30	2020-02-01	2020-12-26	Iowa	5-14 years	Non-Hispanic Black	0			0	0		One or more data cells have counts between 1-9 and have been suppressed in accordance with NCHS confidentiality standards.
2020-12-30	2020-02-01	2020-12-26	Iowa	15-24 years	Non-Hispanic Black		35	0	0	0		One or more data cells have counts between 1-9 and have been suppressed in accordance with NCHS confidentiality standards.
2020-12-30	2020-02-01	2020-12-26	Iowa	18-29 years	Non-Hispanic Black		51			0		One or more data cells have counts between 1-9 and have been suppressed in accordance with NCHS confidentiality standards.
2020-12-30	2020-02-01	2020-12-26	Iowa	25-34 years	Non-Hispanic Black		44			0		One or more data cells have counts between 1-9 and have been suppressed in accordance with NCHS confidentiality standards.
2020-12-30	2020-02-01	2020-12-26	Iowa	30-49 years	Non-Hispanic Black	13	99			0	13	One or more data cells have counts between 1-9 and have been suppressed in accordance with NCHS confidentiality standards.
2020-12-30	2020-02-01	2020-12-26	Iowa	35-44 years	Non-Hispanic Black		41			0		One or more data cells have counts between 1-9 and have been suppressed in accordance with NCHS confidentiality standards.
2020-12-30	2020-02-01	2020-12-26	Iowa	45-54 years	Non-Hispanic Black	12	82			0	14	One or more data cells have counts between 1-9 and have been suppressed in accordance with NCHS confidentiality standards.
2020-12-30	2020-02-01	2020-12-26	Iowa	50-64 years	Non-Hispanic Black	23	178	15			33	One or more data cells have counts between 1-9 and have been suppressed in accordance with NCHS confidentiality standards.
2020-12-30	2020-02-01	2020-12-26	Iowa	55-64 years	Non-Hispanic Black	18	135	11			26	One or more data cells have counts between 1-9 and have been suppressed in accordance with NCHS confidentiality standards.
2020-12-30	2020-02-01	2020-12-26	Iowa	65-74 years	Non-Hispanic Black	26	166	19		0	38	One or more data cells have counts between 1-9 and have been suppressed in accordance with NCHS confidentiality standards.
2020-12-30	2020-02-01	2020-12-26	Iowa	75-84 years	Non-Hispanic Black	23	121			0	27	One or more data cells have counts between 1-9 and have been suppressed in accordance with NCHS confidentiality standards.
2020-12-30	2020-02-01	2020-12-26	Iowa	85 years and over	Non-Hispanic Black	19	89			0	19	One or more data cells have counts between 1-9 and have been suppressed in accordance with NCHS confidentiality standards.
2020-12-30	2020-02-01	2020-12-26	Iowa	Under 1 year	Non-Hispanic American Indian or Alaska Native	0		0	0	0	0	One or more data cells have counts between 1-9 and have been suppressed in accordance with NCHS confidentiality standards.
2020-12-30	2020-02-01	2020-12-26	Iowa	0-17 years	Non-Hispanic American Indian or Alaska Native	0		0	0	0	0	One or more data cells have counts between 1-9 and have been suppressed in accordance with NCHS confidentiality standards.
2020-12-30	2020-02-01	2020-12-26	Iowa	1-4 years	Non-Hispanic American Indian or Alaska Native	0		0	0	0	0	One or more data cells have counts between 1-9 and have been suppressed in accordance with NCHS confidentiality standards.
2020-12-30	2020-02-01	2020-12-26	Iowa	5-14 years	Non-Hispanic American Indian or Alaska Native	0	0	0	0	0	0
2020-12-30	2020-02-01	2020-12-26	Iowa	15-24 years	Non-Hispanic American Indian or Alaska Native	0		0	0	0	0	One or more data cells have counts between 1-9 and have been suppressed in accordance with NCHS confidentiality standards.
2020-12-30	2020-02-01	2020-12-26	Iowa	18-29 years	Non-Hispanic American Indian or Alaska Native					0		One or more data cells have counts between 1-9 and have been suppressed in accordance with NCHS confidentiality standards.
2020-12-30	2020-02-01	2020-12-26	Iowa	25-34 years	Non-Hispanic American Indian or Alaska Native		14			0		One or more data cells have counts between 1-9 and have been suppressed in accordance with NCHS confidentiality standards.
2020-12-30	2020-02-01	2020-12-26	Iowa	30-49 years	Non-Hispanic American Indian or Alaska Native	0	18		0	0		One or more data cells have counts between 1-9 and have been suppressed in accordance with NCHS confidentiality standards.
2020-12-30	2020-02-01	2020-12-26	Iowa	35-44 years	Non-Hispanic American Indian or Alaska Native	0		0	0	0	0	One or more data cells have counts between 1-9 and have been suppressed in accordance with NCHS confidentiality standards.
2020-12-30	2020-02-01	2020-12-26	Iowa	45-54 years	Non-Hispanic American Indian or Alaska Native		16			0		One or more data cells have counts between 1-9 and have been suppressed in accordance with NCHS confidentiality standards.
2020-12-30	2020-02-01	2020-12-26	Iowa	50-64 years	Non-Hispanic American Indian or Alaska Native	10	37	11			15	One or more data cells have counts between 1-9 and have been suppressed in accordance with NCHS confidentiality standards.
2020-12-30	2020-02-01	2020-12-26	Iowa	55-64 years	Non-Hispanic American Indian or Alaska Native		26					One or more data cells have counts between 1-9 and have been suppressed in accordance with NCHS confidentiality standards.
2020-12-30	2020-02-01	2020-12-26	Iowa	65-74 years	Non-Hispanic American Indian or Alaska Native		13			0		One or more data cells have counts between 1-9 and have been suppressed in accordance with NCHS confidentiality standards.
2020-12-30	2020-02-01	2020-12-26	Iowa	75-84 years	Non-Hispanic American Indian or Alaska Native		15			0		One or more data cells have counts between 1-9 and have been suppressed in accordance with NCHS confidentiality standards.
2020-12-30	2020-02-01	2020-12-26	Iowa	85 years and over	Non-Hispanic American Indian or Alaska Native					0		One or more data cells have counts between 1-9 and have been suppressed in accordance with NCHS confidentiality standards.
2020-12-30	2020-02-01	2020-12-26	Iowa	Under 1 year	Non-Hispanic Asian	0		0	0	0	0	One or more data cells have counts between 1-9 and have been suppressed in accordance with NCHS confidentiality standards.
2020-12-30	2020-02-01	2020-12-26	Iowa	0-17 years	Non-Hispanic Asian	0		0	0	0	0	One or more data cells have counts between 1-9 and have been suppressed in accordance with NCHS confidentiality standards.
2020-12-30	2020-02-01	2020-12-26	Iowa	1-4 years	Non-Hispanic Asian	0	0	0	0	0	0
2020-12-30	2020-02-01	2020-12-26	Iowa	5-14 years	Non-Hispanic Asian	0		0	0	0	0	One or more data cells have counts between 1-9 and have been suppressed in accordance with NCHS confidentiality standards.
2020-12-30	2020-02-01	2020-12-26	Iowa	15-24 years	Non-Hispanic Asian	0		0	0	0	0	One or more data cells have counts between 1-9 and have been suppressed in accordance with NCHS confidentiality standards.
2020-12-30	2020-02-01	2020-12-26	Iowa	18-29 years	Non-Hispanic Asian	0		0	0	0	0	One or more data cells have counts between 1-9 and have been suppressed in accordance with NCHS confidentiality standards.
2020-12-30	2020-02-01	2020-12-26	Iowa	25-34 years	Non-Hispanic Asian	0		0	0	0	0	One or more data cells have counts between 1-9 and have been suppressed in accordance with NCHS confidentiality standards.
2020-12-30	2020-02-01	2020-12-26	Iowa	30-49 years	Non-Hispanic Asian		16			0		One or more data cells have counts between 1-9 and have been suppressed in accordance with NCHS confidentiality standards.
2020-12-30	2020-02-01	2020-12-26	Iowa	35-44 years	Non-Hispanic Asian					0		One or more data cells have counts between 1-9 and have been suppressed in accordance with NCHS confidentiality standards.
2020-12-30	2020-02-01	2020-12-26	Iowa	45-54 years	Non-Hispanic Asian		13			0		One or more data cells have counts between 1-9 and have been suppressed in accordance with NCHS confidentiality standards.
2020-12-30	2020-02-01	2020-12-26	Iowa	50-64 years	Non-Hispanic Asian		31			0		One or more data cells have counts between 1-9 and have been suppressed in accordance with NCHS confidentiality standards.
2020-12-30	2020-02-01	2020-12-26	Iowa	55-64 years	Non-Hispanic Asian		23			0		One or more data cells have counts between 1-9 and have been suppressed in accordance with NCHS confidentiality standards.
2020-12-30	2020-02-01	2020-12-26	Iowa	65-74 years	Non-Hispanic Asian	15	46				18	One or more data cells have counts between 1-9 and have been suppressed in accordance with NCHS confidentiality standards.
2020-12-30	2020-02-01	2020-12-26	Iowa	75-84 years	Non-Hispanic Asian	15	48				19	One or more data cells have counts between 1-9 and have been suppressed in accordance with NCHS confidentiality standards.
2020-12-30	2020-02-01	2020-12-26	Iowa	85 years and over	Non-Hispanic Asian	13	59			0	14	One or more data cells have counts between 1-9 and have been suppressed in accordance with NCHS confidentiality standards.
2020-12-30	2020-02-01	2020-12-26	Iowa	Under 1 year	Non-Hispanic Native Hawaiian or Other Pacific Islander			0	0	0		One or more data cells have counts between 1-9 and have been suppressed in accordance with NCHS confidentiality standards.
2020-12-30	2020-02-01	2020-12-26	Iowa	0-17 years	Non-Hispanic Native Hawaiian or Other Pacific Islander			0	0	0		One or more data cells have counts between 1-9 and have been suppressed in accordance with NCHS confidentiality standards.
2020-12-30	2020-02-01	2020-12-26	Iowa	1-4 years	Non-Hispanic Native Hawaiian or Other Pacific Islander	0	0	0	0	0	0
2020-12-30	2020-02-01	2020-12-26	Iowa	5-14 years	Non-Hispanic Native Hawaiian or Other Pacific Islander	0		0	0	0	0	One or more data cells have counts between 1-9 and have been suppressed in accordance with NCHS confidentiality standards.
2020-12-30	2020-02-01	2020-12-26	Iowa	15-24 years	Non-Hispanic Native Hawaiian or Other Pacific Islander	0		0	0	0	0	One or more data cells have counts between 1-9 and have been suppressed in accordance with NCHS confidentiality standards.
2020-12-30	2020-02-01	2020-12-26	Iowa	18-29 years	Non-Hispanic Native Hawaiian or Other Pacific Islander	0	0	0	0	0	0
2020-12-30	2020-02-01	2020-12-26	Iowa	25-34 years	Non-Hispanic Native Hawaiian or Other Pacific Islander			0	0	0		One or more data cells have counts between 1-9 and have been suppressed in accordance with NCHS confidentiality standards.
2020-12-30	2020-02-01	2020-12-26	Iowa	30-49 years	Non-Hispanic Native Hawaiian or Other Pacific Islander		11		0	0		One or more data cells have counts between 1-9 and have been suppressed in accordance with NCHS confidentiality standards.
2020-12-30	2020-02-01	2020-12-26	Iowa	35-44 years	Non-Hispanic Native Hawaiian or Other Pacific Islander	0			0	0		One or more data cells have counts between 1-9 and have been suppressed in accordance with NCHS confidentiality standards.
2020-12-30	2020-02-01	2020-12-26	Iowa	45-54 years	Non-Hispanic Native Hawaiian or Other Pacific Islander					0		One or more data cells have counts between 1-9 and have been suppressed in accordance with NCHS confidentiality standards.
[truncated: 4,490 more rows]
