# Supplementary material for: Racial and Ethnic Disparities in Years of Potential Life Lost Attributable to COVID-19 in the United States: An Analysis of 45 States and the District of Columbia
Source: Int J Environ Res Public Health. 2021 Mar 12;18(6):2921. doi: 10.3390/ijerph18062921 (PMC8000338; doi:10.3390/ijerph18062921)
Supplement: Supplementary file 1 [file ijerph-18-02921-s001.zip › Supplementary Materials/File S3.txt]

Notes	State	State Code	Age	Age Code	Ethnicity	Ethnicity Code	Race	Race Code	Population
	Alabama	01	< 1 year	0	Hispanic or Latino	2135-2	American Indian or Alaska Native	1002-5	199
	Alabama	01	< 1 year	0	Hispanic or Latino	2135-2	Asian or Pacific Islander	A-PI	136
	Alabama	01	< 1 year	0	Hispanic or Latino	2135-2	Black or African American	2054-5	457
	Alabama	01	< 1 year	0	Hispanic or Latino	2135-2	White	2106-3	4348
	Alabama	01	< 1 year	0	Not Hispanic or Latino	2186-5	American Indian or Alaska Native	1002-5	356
	Alabama	01	< 1 year	0	Not Hispanic or Latino	2186-5	Asian or Pacific Islander	A-PI	844
	Alabama	01	< 1 year	0	Not Hispanic or Latino	2186-5	Black or African American	2054-5	18245
	Alabama	01	< 1 year	0	Not Hispanic or Latino	2186-5	White	2106-3	32316
	Alabama	01	1 year	1	Hispanic or Latino	2135-2	American Indian or Alaska Native	1002-5	173
	Alabama	01	1 year	1	Hispanic or Latino	2135-2	Asian or Pacific Islander	A-PI	101
	Alabama	01	1 year	1	Hispanic or Latino	2135-2	Black or African American	2054-5	498
	Alabama	01	1 year	1	Hispanic or Latino	2135-2	White	2106-3	4482
	Alabama	01	1 year	1	Not Hispanic or Latino	2186-5	American Indian or Alaska Native	1002-5	302
	Alabama	01	1 year	1	Not Hispanic or Latino	2186-5	Asian or Pacific Islander	A-PI	957
	Alabama	01	1 year	1	Not Hispanic or Latino	2186-5	Black or African American	2054-5	18293
	Alabama	01	1 year	1	Not Hispanic or Latino	2186-5	White	2106-3	33484
	Alabama	01	2 years	2	Hispanic or Latino	2135-2	American Indian or Alaska Native	1002-5	139
	Alabama	01	2 years	2	Hispanic or Latino	2135-2	Asian or Pacific Islander	A-PI	92
	Alabama	01	2 years	2	Hispanic or Latino	2135-2	Black or African American	2054-5	414
	Alabama	01	2 years	2	Hispanic or Latino	2135-2	White	2106-3	4698
	Alabama	01	2 years	2	Not Hispanic or Latino	2186-5	American Indian or Alaska Native	1002-5	266
	Alabama	01	2 years	2	Not Hispanic or Latino	2186-5	Asian or Pacific Islander	A-PI	993
	Alabama	01	2 years	2	Not Hispanic or Latino	2186-5	Black or African American	2054-5	17917
	Alabama	01	2 years	2	Not Hispanic or Latino	2186-5	White	2106-3	34554
	Alabama	01	3 years	3	Hispanic or Latino	2135-2	American Indian or Alaska Native	1002-5	166
	Alabama	01	3 years	3	Hispanic or Latino	2135-2	Asian or Pacific Islander	A-PI	123
	Alabama	01	3 years	3	Hispanic or Latino	2135-2	Black or African American	2054-5	341
	Alabama	01	3 years	3	Hispanic or Latino	2135-2	White	2106-3	4814
	Alabama	01	3 years	3	Not Hispanic or Latino	2186-5	American Indian or Alaska Native	1002-5	245
	Alabama	01	3 years	3	Not Hispanic or Latino	2186-5	Asian or Pacific Islander	A-PI	1019
	Alabama	01	3 years	3	Not Hispanic or Latino	2186-5	Black or African American	2054-5	18079
	Alabama	01	3 years	3	Not Hispanic or Latino	2186-5	White	2106-3	35012
	Alabama	01	4 years	4	Hispanic or Latino	2135-2	American Indian or Alaska Native	1002-5	194
	Alabama	01	4 years	4	Hispanic or Latino	2135-2	Asian or Pacific Islander	A-PI	162
	Alabama	01	4 years	4	Hispanic or Latino	2135-2	Black or African American	2054-5	366
	Alabama	01	4 years	4	Hispanic or Latino	2135-2	White	2106-3	4550
	Alabama	01	4 years	4	Not Hispanic or Latino	2186-5	American Indian or Alaska Native	1002-5	274
	Alabama	01	4 years	4	Not Hispanic or Latino	2186-5	Asian or Pacific Islander	A-PI	1070
	Alabama	01	4 years	4	Not Hispanic or Latino	2186-5	Black or African American	2054-5	18424
	Alabama	01	4 years	4	Not Hispanic or Latino	2186-5	White	2106-3	35254
	Alabama	01	5 years	5	Hispanic or Latino	2135-2	American Indian or Alaska Native	1002-5	133
	Alabama	01	5 years	5	Hispanic or Latino	2135-2	Asian or Pacific Islander	A-PI	78
	Alabama	01	5 years	5	Hispanic or Latino	2135-2	Black or African American	2054-5	335
	Alabama	01	5 years	5	Hispanic or Latino	2135-2	White	2106-3	4496
	Alabama	01	5 years	5	Not Hispanic or Latino	2186-5	American Indian or Alaska Native	1002-5	291
	Alabama	01	5 years	5	Not Hispanic or Latino	2186-5	Asian or Pacific Islander	A-PI	1005
	Alabama	01	5 years	5	Not Hispanic or Latino	2186-5	Black or African American	2054-5	17853
	Alabama	01	5 years	5	Not Hispanic or Latino	2186-5	White	2106-3	35377
	Alabama	01	6 years	6	Hispanic or Latino	2135-2	American Indian or Alaska Native	1002-5	134
	Alabama	01	6 years	6	Hispanic or Latino	2135-2	Asian or Pacific Islander	A-PI	47
	Alabama	01	6 years	6	Hispanic or Latino	2135-2	Black or African American	2054-5	284
	Alabama	01	6 years	6	Hispanic or Latino	2135-2	White	2106-3	4442
	Alabama	01	6 years	6	Not Hispanic or Latino	2186-5	American Indian or Alaska Native	1002-5	258
	Alabama	01	6 years	6	Not Hispanic or Latino	2186-5	Asian or Pacific Islander	A-PI	975
	Alabama	01	6 years	6	Not Hispanic or Latino	2186-5	Black or African American	2054-5	17947
	Alabama	01	6 years	6	Not Hispanic or Latino	2186-5	White	2106-3	34512
	Alabama	01	7 years	7	Hispanic or Latino	2135-2	American Indian or Alaska Native	1002-5	120
	Alabama	01	7 years	7	Hispanic or Latino	2135-2	Asian or Pacific Islander	A-PI	42
	Alabama	01	7 years	7	Hispanic or Latino	2135-2	Black or African American	2054-5	298
	Alabama	01	7 years	7	Hispanic or Latino	2135-2	White	2106-3	4653
	Alabama	01	7 years	7	Not Hispanic or Latino	2186-5	American Indian or Alaska Native	1002-5	297
	Alabama	01	7 years	7	Not Hispanic or Latino	2186-5	Asian or Pacific Islander	A-PI	1014
	Alabama	01	7 years	7	Not Hispanic or Latino	2186-5	Black or African American	2054-5	17995
	Alabama	01	7 years	7	Not Hispanic or Latino	2186-5	White	2106-3	35118
	Alabama	01	8 years	8	Hispanic or Latino	2135-2	American Indian or Alaska Native	1002-5	117
	Alabama	01	8 years	8	Hispanic or Latino	2135-2	Asian or Pacific Islander	A-PI	46
	Alabama	01	8 years	8	Hispanic or Latino	2135-2	Black or African American	2054-5	332
	Alabama	01	8 years	8	Hispanic or Latino	2135-2	White	2106-3	4887
	Alabama	01	8 years	8	Not Hispanic or Latino	2186-5	American Indian or Alaska Native	1002-5	296
	Alabama	01	8 years	8	Not Hispanic or Latino	2186-5	Asian or Pacific Islander	A-PI	1039
	Alabama	01	8 years	8	Not Hispanic or Latino	2186-5	Black or African American	2054-5	17728
	Alabama	01	8 years	8	Not Hispanic or Latino	2186-5	White	2106-3	35578
	Alabama	01	9 years	9	Hispanic or Latino	2135-2	American Indian or Alaska Native	1002-5	173
	Alabama	01	9 years	9	Hispanic or Latino	2135-2	Asian or Pacific Islander	A-PI	96
	Alabama	01	9 years	9	Hispanic or Latino	2135-2	Black or African American	2054-5	407
	Alabama	01	9 years	9	Hispanic or Latino	2135-2	White	2106-3	4474
	Alabama	01	9 years	9	Not Hispanic or Latino	2186-5	American Indian or Alaska Native	1002-5	306
	Alabama	01	9 years	9	Not Hispanic or Latino	2186-5	Asian or Pacific Islander	A-PI	990
	Alabama	01	9 years	9	Not Hispanic or Latino	2186-5	Black or African American	2054-5	18517
	Alabama	01	9 years	9	Not Hispanic or Latino	2186-5	White	2106-3	35278
	Alabama	01	10 years	10	Hispanic or Latino	2135-2	American Indian or Alaska Native	1002-5	200
	Alabama	01	10 years	10	Hispanic or Latino	2135-2	Asian or Pacific Islander	A-PI	143
	Alabama	01	10 years	10	Hispanic or Latino	2135-2	Black or African American	2054-5	343
	Alabama	01	10 years	10	Hispanic or Latino	2135-2	White	2106-3	4439
	Alabama	01	10 years	10	Not Hispanic or Latino	2186-5	American Indian or Alaska Native	1002-5	321
	Alabama	01	10 years	10	Not Hispanic or Latino	2186-5	Asian or Pacific Islander	A-PI	985
	Alabama	01	10 years	10	Not Hispanic or Latino	2186-5	Black or African American	2054-5	18662
	Alabama	01	10 years	10	Not Hispanic or Latino	2186-5	White	2106-3	35804
	Alabama	01	11 years	11	Hispanic or Latino	2135-2	American Indian or Alaska Native	1002-5	200
	Alabama	01	11 years	11	Hispanic or Latino	2135-2	Asian or Pacific Islander	A-PI	126
	Alabama	01	11 years	11	Hispanic or Latino	2135-2	Black or African American	2054-5	414
	Alabama	01	11 years	11	Hispanic or Latino	2135-2	White	2106-3	4499
	Alabama	01	11 years	11	Not Hispanic or Latino	2186-5	American Indian or Alaska Native	1002-5	336
	Alabama	01	11 years	11	Not Hispanic or Latino	2186-5	Asian or Pacific Islander	A-PI	1088
	Alabama	01	11 years	11	Not Hispanic or Latino	2186-5	Black or African American	2054-5	19380
	Alabama	01	11 years	11	Not Hispanic or Latino	2186-5	White	2106-3	37040
	Alabama	01	12 years	12	Hispanic or Latino	2135-2	American Indian or Alaska Native	1002-5	204
	Alabama	01	12 years	12	Hispanic or Latino	2135-2	Asian or Pacific Islander	A-PI	116
	Alabama	01	12 years	12	Hispanic or Latino	2135-2	Black or African American	2054-5	389
	Alabama	01	12 years	12	Hispanic or Latino	2135-2	White	2106-3	4507
	Alabama	01	12 years	12	Not Hispanic or Latino	2186-5	American Indian or Alaska Native	1002-5	350
	Alabama	01	12 years	12	Not Hispanic or Latino	2186-5	Asian or Pacific Islander	A-PI	1067
	Alabama	01	12 years	12	Not Hispanic or Latino	2186-5	Black or African American	2054-5	19059
	Alabama	01	12 years	12	Not Hispanic or Latino	2186-5	White	2106-3	37214
	Alabama	01	13 years	13	Hispanic or Latino	2135-2	American Indian or Alaska Native	1002-5	198
	Alabama	01	13 years	13	Hispanic or Latino	2135-2	Asian or Pacific Islander	A-PI	132
	Alabama	01	13 years	13	Hispanic or Latino	2135-2	Black or African American	2054-5	364
	Alabama	01	13 years	13	Hispanic or Latino	2135-2	White	2106-3	4221
	Alabama	01	13 years	13	Not Hispanic or Latino	2186-5	American Indian or Alaska Native	1002-5	340
	Alabama	01	13 years	13	Not Hispanic or Latino	2186-5	Asian or Pacific Islander	A-PI	1096
	Alabama	01	13 years	13	Not Hispanic or Latino	2186-5	Black or African American	2054-5	18405
	Alabama	01	13 years	13	Not Hispanic or Latino	2186-5	White	2106-3	37127
	Alabama	01	14 years	14	Hispanic or Latino	2135-2	American Indian or Alaska Native	1002-5	161
	Alabama	01	14 years	14	Hispanic or Latino	2135-2	Asian or Pacific Islander	A-PI	104
	Alabama	01	14 years	14	Hispanic or Latino	2135-2	Black or African American	2054-5	371
	Alabama	01	14 years	14	Hispanic or Latino	2135-2	White	2106-3	3845
	Alabama	01	14 years	14	Not Hispanic or Latino	2186-5	American Indian or Alaska Native	1002-5	349
	Alabama	01	14 years	14	Not Hispanic or Latino	2186-5	Asian or Pacific Islander	A-PI	1080
	Alabama	01	14 years	14	Not Hispanic or Latino	2186-5	Black or African American	2054-5	18132
	Alabama	01	14 years	14	Not Hispanic or Latino	2186-5	White	2106-3	37687
	Alabama	01	15 years	15	Hispanic or Latino	2135-2	American Indian or Alaska Native	1002-5	165
	Alabama	01	15 years	15	Hispanic or Latino	2135-2	Asian or Pacific Islander	A-PI	90
	Alabama	01	15 years	15	Hispanic or Latino	2135-2	Black or African American	2054-5	323
	Alabama	01	15 years	15	Hispanic or Latino	2135-2	White	2106-3	3747
	Alabama	01	15 years	15	Not Hispanic or Latino	2186-5	American Indian or Alaska Native	1002-5	349
	Alabama	01	15 years	15	Not Hispanic or Latino	2186-5	Asian or Pacific Islander	A-PI	1160
	Alabama	01	15 years	15	Not Hispanic or Latino	2186-5	Black or African American	2054-5	17989
	Alabama	01	15 years	15	Not Hispanic or Latino	2186-5	White	2106-3	37917
	Alabama	01	16 years	16	Hispanic or Latino	2135-2	American Indian or Alaska Native	1002-5	141
	Alabama	01	16 years	16	Hispanic or Latino	2135-2	Asian or Pacific Islander	A-PI	91
	Alabama	01	16 years	16	Hispanic or Latino	2135-2	Black or African American	2054-5	343
	Alabama	01	16 years	16	Hispanic or Latino	2135-2	White	2106-3	3472
	Alabama	01	16 years	16	Not Hispanic or Latino	2186-5	American Indian or Alaska Native	1002-5	387
	Alabama	01	16 years	16	Not Hispanic or Latino	2186-5	Asian or Pacific Islander	A-PI	1153
	Alabama	01	16 years	16	Not Hispanic or Latino	2186-5	Black or African American	2054-5	18002
	Alabama	01	16 years	16	Not Hispanic or Latino	2186-5	White	2106-3	38210
	Alabama	01	17 years	17	Hispanic or Latino	2135-2	American Indian or Alaska Native	1002-5	152
	Alabama	01	17 years	17	Hispanic or Latino	2135-2	Asian or Pacific Islander	A-PI	83
	Alabama	01	17 years	17	Hispanic or Latino	2135-2	Black or African American	2054-5	286
	Alabama	01	17 years	17	Hispanic or Latino	2135-2	White	2106-3	3322
	Alabama	01	17 years	17	Not Hispanic or Latino	2186-5	American Indian or Alaska Native	1002-5	377
	Alabama	01	17 years	17	Not Hispanic or Latino	2186-5	Asian or Pacific Islander	A-PI	1059
	Alabama	01	17 years	17	Not Hispanic or Latino	2186-5	Black or African American	2054-5	18524
	Alabama	01	17 years	17	Not Hispanic or Latino	2186-5	White	2106-3	38141
	Alabama	01	18 years	18	Hispanic or Latino	2135-2	American Indian or Alaska Native	1002-5	131
	Alabama	01	18 years	18	Hispanic or Latino	2135-2	Asian or Pacific Islander	A-PI	82
	Alabama	01	18 years	18	Hispanic or Latino	2135-2	Black or African American	2054-5	325
	Alabama	01	18 years	18	Hispanic or Latino	2135-2	White	2106-3	3400
	Alabama	01	18 years	18	Not Hispanic or Latino	2186-5	American Indian or Alaska Native	1002-5	414
	Alabama	01	18 years	18	Not Hispanic or Latino	2186-5	Asian or Pacific Islander	A-PI	1040
	Alabama	01	18 years	18	Not Hispanic or Latino	2186-5	Black or African American	2054-5	20230
	Alabama	01	18 years	18	Not Hispanic or Latino	2186-5	White	2106-3	37912
	Alabama	01	19 years	19	Hispanic or Latino	2135-2	American Indian or Alaska Native	1002-5	126
	Alabama	01	19 years	19	Hispanic or Latino	2135-2	Asian or Pacific Islander	A-PI	84
	Alabama	01	19 years	19	Hispanic or Latino	2135-2	Black or African American	2054-5	346
	Alabama	01	19 years	19	Hispanic or Latino	2135-2	White	2106-3	3209
	Alabama	01	19 years	19	Not Hispanic or Latino	2186-5	American Indian or Alaska Native	1002-5	436
	Alabama	01	19 years	19	Not Hispanic or Latino	2186-5	Asian or Pacific Islander	A-PI	1125
	Alabama	01	19 years	19	Not Hispanic or Latino	2186-5	Black or African American	2054-5	21764
	Alabama	01	19 years	19	Not Hispanic or Latino	2186-5	White	2106-3	37508
	Alabama	01	20 years	20	Hispanic or Latino	2135-2	American Indian or Alaska Native	1002-5	102
	Alabama	01	20 years	20	Hispanic or Latino	2135-2	Asian or Pacific Islander	A-PI	69
	Alabama	01	20 years	20	Hispanic or Latino	2135-2	Black or African American	2054-5	350
	Alabama	01	20 years	20	Hispanic or Latino	2135-2	White	2106-3	2912
	Alabama	01	20 years	20	Not Hispanic or Latino	2186-5	American Indian or Alaska Native	1002-5	416
	Alabama	01	20 years	20	Not Hispanic or Latino	2186-5	Asian or Pacific Islander	A-PI	1104
	Alabama	01	20 years	20	Not Hispanic or Latino	2186-5	Black or African American	2054-5	20659
	Alabama	01	20 years	20	Not Hispanic or Latino	2186-5	White	2106-3	38326
	Alabama	01	21 years	21	Hispanic or Latino	2135-2	American Indian or Alaska Native	1002-5	101
	Alabama	01	21 years	21	Hispanic or Latino	2135-2	Asian or Pacific Islander	A-PI	70
	Alabama	01	21 years	21	Hispanic or Latino	2135-2	Black or African American	2054-5	342
	Alabama	01	21 years	21	Hispanic or Latino	2135-2	White	2106-3	2787
	Alabama	01	21 years	21	Not Hispanic or Latino	2186-5	American Indian or Alaska Native	1002-5	403
	Alabama	01	21 years	21	Not Hispanic or Latino	2186-5	Asian or Pacific Islander	A-PI	1145
	Alabama	01	21 years	21	Not Hispanic or Latino	2186-5	Black or African American	2054-5	20635
	Alabama	01	21 years	21	Not Hispanic or Latino	2186-5	White	2106-3	39107
	Alabama	01	22 years	22	Hispanic or Latino	2135-2	American Indian or Alaska Native	1002-5	116
	Alabama	01	22 years	22	Hispanic or Latino	2135-2	Asian or Pacific Islander	A-PI	50
	Alabama	01	22 years	22	Hispanic or Latino	2135-2	Black or African American	2054-5	250
	Alabama	01	22 years	22	Hispanic or Latino	2135-2	White	2106-3	2793
	Alabama	01	22 years	22	Not Hispanic or Latino	2186-5	American Indian or Alaska Native	1002-5	414
	Alabama	01	22 years	22	Not Hispanic or Latino	2186-5	Asian or Pacific Islander	A-PI	1372
	Alabama	01	22 years	22	Not Hispanic or Latino	2186-5	Black or African American	2054-5	20061
	Alabama	01	22 years	22	Not Hispanic or Latino	2186-5	White	2106-3	39554
	Alabama	01	23 years	23	Hispanic or Latino	2135-2	American Indian or Alaska Native	1002-5	93
	Alabama	01	23 years	23	Hispanic or Latino	2135-2	Asian or Pacific Islander	A-PI	83
	Alabama	01	23 years	23	Hispanic or Latino	2135-2	Black or African American	2054-5	259
	Alabama	01	23 years	23	Hispanic or Latino	2135-2	White	2106-3	2533
	Alabama	01	23 years	23	Not Hispanic or Latino	2186-5	American Indian or Alaska Native	1002-5	418
	Alabama	01	23 years	23	Not Hispanic or Latino	2186-5	Asian or Pacific Islander	A-PI	1372
	Alabama	01	23 years	23	Not Hispanic or Latino	2186-5	Black or African American	2054-5	19698
	Alabama	01	23 years	23	Not Hispanic or Latino	2186-5	White	2106-3	40003
	Alabama	01	24 years	24	Hispanic or Latino	2135-2	American Indian or Alaska Native	1002-5	98
	Alabama	01	24 years	24	Hispanic or Latino	2135-2	Asian or Pacific Islander	A-PI	62
	Alabama	01	24 years	24	Hispanic or Latino	2135-2	Black or African American	2054-5	239
	Alabama	01	24 years	24	Hispanic or Latino	2135-2	White	2106-3	2539
	Alabama	01	24 years	24	Not Hispanic or Latino	2186-5	American Indian or Alaska Native	1002-5	431
	Alabama	01	24 years	24	Not Hispanic or Latino	2186-5	Asian or Pacific Islander	A-PI	1331
	Alabama	01	24 years	24	Not Hispanic or Latino	2186-5	Black or African American	2054-5	20402
	Alabama	01	24 years	24	Not Hispanic or Latino	2186-5	White	2106-3	39393
	Alabama	01	25 years	25	Hispanic or Latino	2135-2	American Indian or Alaska Native	1002-5	92
	Alabama	01	25 years	25	Hispanic or Latino	2135-2	Asian or Pacific Islander	A-PI	73
	Alabama	01	25 years	25	Hispanic or Latino	2135-2	Black or African American	2054-5	278
	Alabama	01	25 years	25	Hispanic or Latino	2135-2	White	2106-3	2636
	Alabama	01	25 years	25	Not Hispanic or Latino	2186-5	American Indian or Alaska Native	1002-5	415
	Alabama	01	25 years	25	Not Hispanic or Latino	2186-5	Asian or Pacific Islander	A-PI	1343
	Alabama	01	25 years	25	Not Hispanic or Latino	2186-5	Black or African American	2054-5	20883
	Alabama	01	25 years	25	Not Hispanic or Latino	2186-5	White	2106-3	39850
	Alabama	01	26 years	26	Hispanic or Latino	2135-2	American Indian or Alaska Native	1002-5	94
	Alabama	01	26 years	26	Hispanic or Latino	2135-2	Asian or Pacific Islander	A-PI	70
	Alabama	01	26 years	26	Hispanic or Latino	2135-2	Black or African American	2054-5	271
	Alabama	01	26 years	26	Hispanic or Latino	2135-2	White	2106-3	2669
	Alabama	01	26 years	26	Not Hispanic or Latino	2186-5	American Indian or Alaska Native	1002-5	477
	Alabama	01	26 years	26	Not Hispanic or Latino	2186-5	Asian or Pacific Islander	A-PI	1209
	Alabama	01	26 years	26	Not Hispanic or Latino	2186-5	Black or African American	2054-5	21247
	Alabama	01	26 years	26	Not Hispanic or Latino	2186-5	White	2106-3	39690
	Alabama	01	27 years	27	Hispanic or Latino	2135-2	American Indian or Alaska Native	1002-5	106
	Alabama	01	27 years	27	Hispanic or Latino	2135-2	Asian or Pacific Islander	A-PI	64
	Alabama	01	27 years	27	Hispanic or Latino	2135-2	Black or African American	2054-5	300
	Alabama	01	27 years	27	Hispanic or Latino	2135-2	White	2106-3	2642
	Alabama	01	27 years	27	Not Hispanic or Latino	2186-5	American Indian or Alaska Native	1002-5	461
	Alabama	01	27 years	27	Not Hispanic or Latino	2186-5	Asian or Pacific Islander	A-PI	1409
	Alabama	01	27 years	27	Not Hispanic or Latino	2186-5	Black or African American	2054-5	21508
	Alabama	01	27 years	27	Not Hispanic or Latino	2186-5	White	2106-3	41107
	Alabama	01	28 years	28	Hispanic or Latino	2135-2	American Indian or Alaska Native	1002-5	111
	Alabama	01	28 years	28	Hispanic or Latino	2135-2	Asian or Pacific Islander	A-PI	72
	Alabama	01	28 years	28	Hispanic or Latino	2135-2	Black or African American	2054-5	312
	Alabama	01	28 years	28	Hispanic or Latino	2135-2	White	2106-3	2712
	Alabama	01	28 years	28	Not Hispanic or Latino	2186-5	American Indian or Alaska Native	1002-5	420
	Alabama	01	28 years	28	Not Hispanic or Latino	2186-5	Asian or Pacific Islander	A-PI	1333
	Alabama	01	28 years	28	Not Hispanic or Latino	2186-5	Black or African American	2054-5	21785
	Alabama	01	28 years	28	Not Hispanic or Latino	2186-5	White	2106-3	43225
	Alabama	01	29 years	29	Hispanic or Latino	2135-2	American Indian or Alaska Native	1002-5	111
	Alabama	01	29 years	29	Hispanic or Latino	2135-2	Asian or Pacific Islander	A-PI	86
	Alabama	01	29 years	29	Hispanic or Latino	2135-2	Black or African American	2054-5	316
	Alabama	01	29 years	29	Hispanic or Latino	2135-2	White	2106-3	2687
	Alabama	01	29 years	29	Not Hispanic or Latino	2186-5	American Indian or Alaska Native	1002-5	422
	Alabama	01	29 years	29	Not Hispanic or Latino	2186-5	Asian or Pacific Islander	A-PI	1229
	Alabama	01	29 years	29	Not Hispanic or Latino	2186-5	Black or African American	2054-5	21287
	Alabama	01	29 years	29	Not Hispanic or Latino	2186-5	White	2106-3	43136
	Alabama	01	30 years	30	Hispanic or Latino	2135-2	American Indian or Alaska Native	1002-5	148
	Alabama	01	30 years	30	Hispanic or Latino	2135-2	Asian or Pacific Islander	A-PI	90
	Alabama	01	30 years	30	Hispanic or Latino	2135-2	Black or African American	2054-5	279
	Alabama	01	30 years	30	Hispanic or Latino	2135-2	White	2106-3	2646
	Alabama	01	30 years	30	Not Hispanic or Latino	2186-5	American Indian or Alaska Native	1002-5	388
	Alabama	01	30 years	30	Not Hispanic or Latino	2186-5	Asian or Pacific Islander	A-PI	1165
	Alabama	01	30 years	30	Not Hispanic or Latino	2186-5	Black or African American	2054-5	19828
	Alabama	01	30 years	30	Not Hispanic or Latino	2186-5	White	2106-3	40789
	Alabama	01	31 years	31	Hispanic or Latino	2135-2	American Indian or Alaska Native	1002-5	142
	Alabama	01	31 years	31	Hispanic or Latino	2135-2	Asian or Pacific Islander	A-PI	68
	Alabama	01	31 years	31	Hispanic or Latino	2135-2	Black or African American	2054-5	241
	Alabama	01	31 years	31	Hispanic or Latino	2135-2	White	2106-3	2776
	Alabama	01	31 years	31	Not Hispanic or Latino	2186-5	American Indian or Alaska Native	1002-5	352
	Alabama	01	31 years	31	Not Hispanic or Latino	2186-5	Asian or Pacific Islander	A-PI	1148
	Alabama	01	31 years	31	Not Hispanic or Latino	2186-5	Black or African American	2054-5	18510
	Alabama	01	31 years	31	Not Hispanic or Latino	2186-5	White	2106-3	38710
	Alabama	01	32 years	32	Hispanic or Latino	2135-2	American Indian or Alaska Native	1002-5	134
	Alabama	01	32 years	32	Hispanic or Latino	2135-2	Asian or Pacific Islander	A-PI	96
	Alabama	01	32 years	32	Hispanic or Latino	2135-2	Black or African American	2054-5	265
	Alabama	01	32 years	32	Hispanic or Latino	2135-2	White	2106-3	2992
	Alabama	01	32 years	32	Not Hispanic or Latino	2186-5	American Indian or Alaska Native	1002-5	363
	Alabama	01	32 years	32	Not Hispanic or Latino	2186-5	Asian or Pacific Islander	A-PI	1193
	Alabama	01	32 years	32	Not Hispanic or Latino	2186-5	Black or African American	2054-5	17676
	Alabama	01	32 years	32	Not Hispanic or Latino	2186-5	White	2106-3	37743
	Alabama	01	33 years	33	Hispanic or Latino	2135-2	American Indian or Alaska Native	1002-5	118
	Alabama	01	33 years	33	Hispanic or Latino	2135-2	Asian or Pacific Islander	A-PI	92
	Alabama	01	33 years	33	Hispanic or Latino	2135-2	Black or African American	2054-5	269
	Alabama	01	33 years	33	Hispanic or Latino	2135-2	White	2106-3	2897
	Alabama	01	33 years	33	Not Hispanic or Latino	2186-5	American Indian or Alaska Native	1002-5	375
	Alabama	01	33 years	33	Not Hispanic or Latino	2186-5	Asian or Pacific Islander	A-PI	1324
	Alabama	01	33 years	33	Not Hispanic or Latino	2186-5	Black or African American	2054-5	17233
	Alabama	01	33 years	33	Not Hispanic or Latino	2186-5	White	2106-3	37806
	Alabama	01	34 years	34	Hispanic or Latino	2135-2	American Indian or Alaska Native	1002-5	136
	Alabama	01	34 years	34	Hispanic or Latino	2135-2	Asian or Pacific Islander	A-PI	85
	Alabama	01	34 years	34	Hispanic or Latino	2135-2	Black or African American	2054-5	277
	Alabama	01	34 years	34	Hispanic or Latino	2135-2	White	2106-3	3145
	Alabama	01	34 years	34	Not Hispanic or Latino	2186-5	American Indian or Alaska Native	1002-5	384
	Alabama	01	34 years	34	Not Hispanic or Latino	2186-5	Asian or Pacific Islander	A-PI	1351
	Alabama	01	34 years	34	Not Hispanic or Latino	2186-5	Black or African American	2054-5	17379
	Alabama	01	34 years	34	Not Hispanic or Latino	2186-5	White	2106-3	38478
	Alabama	01	35 years	35	Hispanic or Latino	2135-2	American Indian or Alaska Native	1002-5	161
	Alabama	01	35 years	35	Hispanic or Latino	2135-2	Asian or Pacific Islander	A-PI	80
	Alabama	01	35 years	35	Hispanic or Latino	2135-2	Black or African American	2054-5	243
	Alabama	01	35 years	35	Hispanic or Latino	2135-2	White	2106-3	2839
	Alabama	01	35 years	35	Not Hispanic or Latino	2186-5	American Indian or Alaska Native	1002-5	394
	Alabama	01	35 years	35	Not Hispanic or Latino	2186-5	Asian or Pacific Islander	A-PI	1368
	Alabama	01	35 years	35	Not Hispanic or Latino	2186-5	Black or African American	2054-5	16587
	Alabama	01	35 years	35	Not Hispanic or Latino	2186-5	White	2106-3	37730
	Alabama	01	36 years	36	Hispanic or Latino	2135-2	American Indian or Alaska Native	1002-5	124
	Alabama	01	36 years	36	Hispanic or Latino	2135-2	Asian or Pacific Islander	A-PI	76
	Alabama	01	36 years	36	Hispanic or Latino	2135-2	Black or African American	2054-5	265
	Alabama	01	36 years	36	Hispanic or Latino	2135-2	White	2106-3	2976
	Alabama	01	36 years	36	Not Hispanic or Latino	2186-5	American Indian or Alaska Native	1002-5	396
	Alabama	01	36 years	36	Not Hispanic or Latino	2186-5	Asian or Pacific Islander	A-PI	1424
	Alabama	01	36 years	36	Not Hispanic or Latino	2186-5	Black or African American	2054-5	16911
	Alabama	01	36 years	36	Not Hispanic or Latino	2186-5	White	2106-3	38165
	Alabama	01	37 years	37	Hispanic or Latino	2135-2	American Indian or Alaska Native	1002-5	164
	Alabama	01	37 years	37	Hispanic or Latino	2135-2	Asian or Pacific Islander	A-PI	102
	Alabama	01	37 years	37	Hispanic or Latino	2135-2	Black or African American	2054-5	256
	Alabama	01	37 years	37	Hispanic or Latino	2135-2	White	2106-3	3084
	Alabama	01	37 years	37	Not Hispanic or Latino	2186-5	American Indian or Alaska Native	1002-5	397
	Alabama	01	37 years	37	Not Hispanic or Latino	2186-5	Asian or Pacific Islander	A-PI	1352
	Alabama	01	37 years	37	Not Hispanic or Latino	2186-5	Black or African American	2054-5	17046
	Alabama	01	37 years	37	Not Hispanic or Latino	2186-5	White	2106-3	38380
	Alabama	01	38 years	38	Hispanic or Latino	2135-2	American Indian or Alaska Native	1002-5	161
	Alabama	01	38 years	38	Hispanic or Latino	2135-2	Asian or Pacific Islander	A-PI	81
	Alabama	01	38 years	38	Hispanic or Latino	2135-2	Black or African American	2054-5	255
	Alabama	01	38 years	38	Hispanic or Latino	2135-2	White	2106-3	2918
	Alabama	01	38 years	38	Not Hispanic or Latino	2186-5	American Indian or Alaska Native	1002-5	410
	Alabama	01	38 years	38	Not Hispanic or Latino	2186-5	Asian or Pacific Islander	A-PI	1345
	Alabama	01	38 years	38	Not Hispanic or Latino	2186-5	Black or African American	2054-5	17213
	Alabama	01	38 years	38	Not Hispanic or Latino	2186-5	White	2106-3	38670
	Alabama	01	39 years	39	Hispanic or Latino	2135-2	American Indian or Alaska Native	1002-5	155
	Alabama	01	39 years	39	Hispanic or Latino	2135-2	Asian or Pacific Islander	A-PI	97
	Alabama	01	39 years	39	Hispanic or Latino	2135-2	Black or African American	2054-5	243
	Alabama	01	39 years	39	Hispanic or Latino	2135-2	White	2106-3	3030
	Alabama	01	39 years	39	Not Hispanic or Latino	2186-5	American Indian or Alaska Native	1002-5	412
	Alabama	01	39 years	39	Not Hispanic or Latino	2186-5	Asian or Pacific Islander	A-PI	1346
	Alabama	01	39 years	39	Not Hispanic or Latino	2186-5	Black or African American	2054-5	18054
	Alabama	01	39 years	39	Not Hispanic or Latino	2186-5	White	2106-3	39235
	Alabama	01	40 years	40	Hispanic or Latino	2135-2	American Indian or Alaska Native	1002-5	140
	Alabama	01	40 years	40	Hispanic or Latino	2135-2	Asian or Pacific Islander	A-PI	62
	Alabama	01	40 years	40	Hispanic or Latino	2135-2	Black or African American	2054-5	195
	Alabama	01	40 years	40	Hispanic or Latino	2135-2	White	2106-3	2575
	Alabama	01	40 years	40	Not Hispanic or Latino	2186-5	American Indian or Alaska Native	1002-5	370
	Alabama	01	40 years	40	Not Hispanic or Latino	2186-5	Asian or Pacific Islander	A-PI	1269
	Alabama	01	40 years	40	Not Hispanic or Latino	2186-5	Black or African American	2054-5	16702
	Alabama	01	40 years	40	Not Hispanic or Latino	2186-5	White	2106-3	37177
	Alabama	01	41 years	41	Hispanic or Latino	2135-2	American Indian or Alaska Native	1002-5	154
	Alabama	01	41 years	41	Hispanic or Latino	2135-2	Asian or Pacific Islander	A-PI	89
	Alabama	01	41 years	41	Hispanic or Latino	2135-2	Black or African American	2054-5	241
	Alabama	01	41 years	41	Hispanic or Latino	2135-2	White	2106-3	2679
	Alabama	01	41 years	41	Not Hispanic or Latino	2186-5	American Indian or Alaska Native	1002-5	374
	Alabama	01	41 years	41	Not Hispanic or Latino	2186-5	Asian or Pacific Islander	A-PI	1210
	Alabama	01	41 years	41	Not Hispanic or Latino	2186-5	Black or African American	2054-5	16052
	Alabama	01	41 years	41	Not Hispanic or Latino	2186-5	White	2106-3	37512
	Alabama	01	42 years	42	Hispanic or Latino	2135-2	American Indian or Alaska Native	1002-5	127
	Alabama	01	42 years	42	Hispanic or Latino	2135-2	Asian or Pacific Islander	A-PI	80
	Alabama	01	42 years	42	Hispanic or Latino	2135-2	Black or African American	2054-5	215
	Alabama	01	42 years	42	Hispanic or Latino	2135-2	White	2106-3	2620
	Alabama	01	42 years	42	Not Hispanic or Latino	2186-5	American Indian or Alaska Native	1002-5	389
	Alabama	01	42 years	42	Not Hispanic or Latino	2186-5	Asian or Pacific Islander	A-PI	1262
	Alabama	01	42 years	42	Not Hispanic or Latino	2186-5	Black or African American	2054-5	15799
	Alabama	01	42 years	42	Not Hispanic or Latino	2186-5	White	2106-3	37666
	Alabama	01	43 years	43	Hispanic or Latino	2135-2	American Indian or Alaska Native	1002-5	94
	Alabama	01	43 years	43	Hispanic or Latino	2135-2	Asian or Pacific Islander	A-PI	69
	Alabama	01	43 years	43	Hispanic or Latino	2135-2	Black or African American	2054-5	193
	Alabama	01	43 years	43	Hispanic or Latino	2135-2	White	2106-3	2558
	Alabama	01	43 years	43	Not Hispanic or Latino	2186-5	American Indian or Alaska Native	1002-5	363
	Alabama	01	43 years	43	Not Hispanic or Latino	2186-5	Asian or Pacific Islander	A-PI	1203
	Alabama	01	43 years	43	Not Hispanic or Latino	2186-5	Black or African American	2054-5	15020
	Alabama	01	43 years	43	Not Hispanic or Latino	2186-5	White	2106-3	36276
	Alabama	01	44 years	44	Hispanic or Latino	2135-2	American Indian or Alaska Native	1002-5	139
	Alabama	01	44 years	44	Hispanic or Latino	2135-2	Asian or Pacific Islander	A-PI	67
	Alabama	01	44 years	44	Hispanic or Latino	2135-2	Black or African American	2054-5	208
	Alabama	01	44 years	44	Hispanic or Latino	2135-2	White	2106-3	2601
	Alabama	01	44 years	44	Not Hispanic or Latino	2186-5	American Indian or Alaska Native	1002-5	369
	Alabama	01	44 years	44	Not Hispanic or Latino	2186-5	Asian or Pacific Islander	A-PI	1211
	Alabama	01	44 years	44	Not Hispanic or Latino	2186-5	Black or African American	2054-5	15695
	Alabama	01	44 years	44	Not Hispanic or Latino	2186-5	White	2106-3	38136
	Alabama	01	45 years	45	Hispanic or Latino	2135-2	American Indian or Alaska Native	1002-5	102
	Alabama	01	45 years	45	Hispanic or Latino	2135-2	Asian or Pacific Islander	A-PI	81
	Alabama	01	45 years	45	Hispanic or Latino	2135-2	Black or African American	2054-5	213
	Alabama	01	45 years	45	Hispanic or Latino	2135-2	White	2106-3	2346
	Alabama	01	45 years	45	Not Hispanic or Latino	2186-5	American Indian or Alaska Native	1002-5	373
	Alabama	01	45 years	45	Not Hispanic or Latino	2186-5	Asian or Pacific Islander	A-PI	1168
	Alabama	01	45 years	45	Not Hispanic or Latino	2186-5	Black or African American	2054-5	15202
	Alabama	01	45 years	45	Not Hispanic or Latino	2186-5	White	2106-3	37740
	Alabama	01	46 years	46	Hispanic or Latino	2135-2	American Indian or Alaska Native	1002-5	75
	Alabama	01	46 years	46	Hispanic or Latino	2135-2	Asian or Pacific Islander	A-PI	58
	Alabama	01	46 years	46	Hispanic or Latino	2135-2	Black or African American	2054-5	203
	Alabama	01	46 years	46	Hispanic or Latino	2135-2	White	2106-3	2319
	Alabama	01	46 years	46	Not Hispanic or Latino	2186-5	American Indian or Alaska Native	1002-5	375
	Alabama	01	46 years	46	Not Hispanic or Latino	2186-5	Asian or Pacific Islander	A-PI	1281
	Alabama	01	46 years	46	Not Hispanic or Latino	2186-5	Black or African American	2054-5	15720
	Alabama	01	46 years	46	Not Hispanic or Latino	2186-5	White	2106-3	39041
	Alabama	01	47 years	47	Hispanic or Latino	2135-2	American Indian or Alaska Native	1002-5	95
	Alabama	01	47 years	47	Hispanic or Latino	2135-2	Asian or Pacific Islander	A-PI	55
	Alabama	01	47 years	47	Hispanic or Latino	2135-2	Black or African American	2054-5	174
	Alabama	01	47 years	47	Hispanic or Latino	2135-2	White	2106-3	2107
	Alabama	01	47 years	47	Not Hispanic or Latino	2186-5	American Indian or Alaska Native	1002-5	408
	Alabama	01	47 years	47	Not Hispanic or Latino	2186-5	Asian or Pacific Islander	A-PI	1272
	Alabama	01	47 years	47	Not Hispanic or Latino	2186-5	Black or African American	2054-5	16181
	Alabama	01	47 years	47	Not Hispanic or Latino	2186-5	White	2106-3	41849
	Alabama	01	48 years	48	Hispanic or Latino	2135-2	American Indian or Alaska Native	1002-5	108
	Alabama	01	48 years	48	Hispanic or Latino	2135-2	Asian or Pacific Islander	A-PI	68
	Alabama	01	48 years	48	Hispanic or Latino	2135-2	Black or African American	2054-5	163
	Alabama	01	48 years	48	Hispanic or Latino	2135-2	White	2106-3	2048
	Alabama	01	48 years	48	Not Hispanic or Latino	2186-5	American Indian or Alaska Native	1002-5	429
	Alabama	01	48 years	48	Not Hispanic or Latino	2186-5	Asian or Pacific Islander	A-PI	1330
	Alabama	01	48 years	48	Not Hispanic or Latino	2186-5	Black or African American	2054-5	16302
	Alabama	01	48 years	48	Not Hispanic or Latino	2186-5	White	2106-3	45169
	Alabama	01	49 years	49	Hispanic or Latino	2135-2	American Indian or Alaska Native	1002-5	86
	Alabama	01	49 years	49	Hispanic or Latino	2135-2	Asian or Pacific Islander	A-PI	58
	Alabama	01	49 years	49	Hispanic or Latino	2135-2	Black or African American	2054-5	180
	Alabama	01	49 years	49	Hispanic or Latino	2135-2	White	2106-3	2027
	Alabama	01	49 years	49	Not Hispanic or Latino	2186-5	American Indian or Alaska Native	1002-5	413
	Alabama	01	49 years	49	Not Hispanic or Latino	2186-5	Asian or Pacific Islander	A-PI	1335
	Alabama	01	49 years	49	Not Hispanic or Latino	2186-5	Black or African American	2054-5	15904
	Alabama	01	49 years	49	Not Hispanic or Latino	2186-5	White	2106-3	44893
	Alabama	01	50 years	50	Hispanic or Latino	2135-2	American Indian or Alaska Native	1002-5	62
	Alabama	01	50 years	50	Hispanic or Latino	2135-2	Asian or Pacific Islander	A-PI	50
	Alabama	01	50 years	50	Hispanic or Latino	2135-2	Black or African American	2054-5	182
	Alabama	01	50 years	50	Hispanic or Latino	2135-2	White	2106-3	1792
	Alabama	01	50 years	50	Not Hispanic or Latino	2186-5	American Indian or Alaska Native	1002-5	424
	Alabama	01	50 years	50	Not Hispanic or Latino	2186-5	Asian or Pacific Islander	A-PI	1149
	Alabama	01	50 years	50	Not Hispanic or Latino	2186-5	Black or African American	2054-5	14847
	Alabama	01	50 years	50	Not Hispanic or Latino	2186-5	White	2106-3	42346
	Alabama	01	51 years	51	Hispanic or Latino	2135-2	American Indian or Alaska Native	1002-5	68
	Alabama	01	51 years	51	Hispanic or Latino	2135-2	Asian or Pacific Islander	A-PI	46
	Alabama	01	51 years	51	Hispanic or Latino	2135-2	Black or African American	2054-5	180
	Alabama	01	51 years	51	Hispanic or Latino	2135-2	White	2106-3	1744
	Alabama	01	51 years	51	Not Hispanic or Latino	2186-5	American Indian or Alaska Native	1002-5	388
	Alabama	01	51 years	51	Not Hispanic or Latino	2186-5	Asian or Pacific Islander	A-PI	1100
	Alabama	01	51 years	51	Not Hispanic or Latino	2186-5	Black or African American	2054-5	15046
	Alabama	01	51 years	51	Not Hispanic or Latino	2186-5	White	2106-3	41021
	Alabama	01	52 years	52	Hispanic or Latino	2135-2	American Indian or Alaska Native	1002-5	69
	Alabama	01	52 years	52	Hispanic or Latino	2135-2	Asian or Pacific Islander	A-PI	37
	Alabama	01	52 years	52	Hispanic or Latino	2135-2	Black or African American	2054-5	157
	Alabama	01	52 years	52	Hispanic or Latino	2135-2	White	2106-3	1629
	Alabama	01	52 years	52	Not Hispanic or Latino	2186-5	American Indian or Alaska Native	1002-5	385
	Alabama	01	52 years	52	Not Hispanic or Latino	2186-5	Asian or Pacific Islander	A-PI	996
	Alabama	01	52 years	52	Not Hispanic or Latino	2186-5	Black or African American	2054-5	15085
	Alabama	01	52 years	52	Not Hispanic or Latino	2186-5	White	2106-3	41502
	Alabama	01	53 years	53	Hispanic or Latino	2135-2	American Indian or Alaska Native	1002-5	70
	Alabama	01	53 years	53	Hispanic or Latino	2135-2	Asian or Pacific Islander	A-PI	33
	Alabama	01	53 years	53	Hispanic or Latino	2135-2	Black or African American	2054-5	146
	Alabama	01	53 years	53	Hispanic or Latino	2135-2	White	2106-3	1512
	Alabama	01	53 years	53	Not Hispanic or Latino	2186-5	American Indian or Alaska Native	1002-5	410
	Alabama	01	53 years	53	Not Hispanic or Latino	2186-5	Asian or Pacific Islander	A-PI	985
	Alabama	01	53 years	53	Not Hispanic or Latino	2186-5	Black or African American	2054-5	15665
	Alabama	01	53 years	53	Not Hispanic or Latino	2186-5	White	2106-3	42556
	Alabama	01	54 years	54	Hispanic or Latino	2135-2	American Indian or Alaska Native	1002-5	56
	Alabama	01	54 years	54	Hispanic or Latino	2135-2	Asian or Pacific Islander	A-PI	40
	Alabama	01	54 years	54	Hispanic or Latino	2135-2	Black or African American	2054-5	139
	Alabama	01	54 years	54	Hispanic or Latino	2135-2	White	2106-3	1556
	Alabama	01	54 years	54	Not Hispanic or Latino	2186-5	American Indian or Alaska Native	1002-5	464
	Alabama	01	54 years	54	Not Hispanic or Latino	2186-5	Asian or Pacific Islander	A-PI	961
	Alabama	01	54 years	54	Not Hispanic or Latino	2186-5	Black or African American	2054-5	16752
	Alabama	01	54 years	54	Not Hispanic or Latino	2186-5	White	2106-3	46015
	Alabama	01	55 years	55	Hispanic or Latino	2135-2	American Indian or Alaska Native	1002-5	41
	Alabama	01	55 years	55	Hispanic or Latino	2135-2	Asian or Pacific Islander	A-PI	44
	Alabama	01	55 years	55	Hispanic or Latino	2135-2	Black or African American	2054-5	134
	Alabama	01	55 years	55	Hispanic or Latino	2135-2	White	2106-3	1461
	Alabama	01	55 years	55	Not Hispanic or Latino	2186-5	American Indian or Alaska Native	1002-5	451
	Alabama	01	55 years	55	Not Hispanic or Latino	2186-5	Asian or Pacific Islander	A-PI	989
	Alabama	01	55 years	55	Not Hispanic or Latino	2186-5	Black or African American	2054-5	16606
	Alabama	01	55 years	55	Not Hispanic or Latino	2186-5	White	2106-3	47222
	Alabama	01	56 years	56	Hispanic or Latino	2135-2	American Indian or Alaska Native	1002-5	52
	Alabama	01	56 years	56	Hispanic or Latino	2135-2	Asian or Pacific Islander	A-PI	39
	Alabama	01	56 years	56	Hispanic or Latino	2135-2	Black or African American	2054-5	146
	Alabama	01	56 years	56	Hispanic or Latino	2135-2	White	2106-3	1362
	Alabama	01	56 years	56	Not Hispanic or Latino	2186-5	American Indian or Alaska Native	1002-5	432
	Alabama	01	56 years	56	Not Hispanic or Latino	2186-5	Asian or Pacific Islander	A-PI	943
	Alabama	01	56 years	56	Not Hispanic or Latino	2186-5	Black or African American	2054-5	16765
	Alabama	01	56 years	56	Not Hispanic or Latino	2186-5	White	2106-3	46987
	Alabama	01	57 years	57	Hispanic or Latino	2135-2	American Indian or Alaska Native	1002-5	63
	Alabama	01	57 years	57	Hispanic or Latino	2135-2	Asian or Pacific Islander	A-PI	28
	Alabama	01	57 years	57	Hispanic or Latino	2135-2	Black or African American	2054-5	142
	Alabama	01	57 years	57	Hispanic or Latino	2135-2	White	2106-3	1298
	Alabama	01	57 years	57	Not Hispanic or Latino	2186-5	American Indian or Alaska Native	1002-5	491
	Alabama	01	57 years	57	Not Hispanic or Latino	2186-5	Asian or Pacific Islander	A-PI	914
	Alabama	01	57 years	57	Not Hispanic or Latino	2186-5	Black or African American	2054-5	16699
	Alabama	01	57 years	57	Not Hispanic or Latino	2186-5	White	2106-3	47456
	Alabama	01	58 years	58	Hispanic or Latino	2135-2	American Indian or Alaska Native	1002-5	68
	Alabama	01	58 years	58	Hispanic or Latino	2135-2	Asian or Pacific Islander	A-PI	28
	Alabama	01	58 years	58	Hispanic or Latino	2135-2	Black or African American	2054-5	132
	Alabama	01	58 years	58	Hispanic or Latino	2135-2	White	2106-3	1159
	Alabama	01	58 years	58	Not Hispanic or Latino	2186-5	American Indian or Alaska Native	1002-5	488
	Alabama	01	58 years	58	Not Hispanic or Latino	2186-5	Asian or Pacific Islander	A-PI	857
	Alabama	01	58 years	58	Not Hispanic or Latino	2186-5	Black or African American	2054-5	16618
	Alabama	01	58 years	58	Not Hispanic or Latino	2186-5	White	2106-3	47976
	Alabama	01	59 years	59	Hispanic or Latino	2135-2	American Indian or Alaska Native	1002-5	64
	Alabama	01	59 years	59	Hispanic or Latino	2135-2	Asian or Pacific Islander	A-PI	26
	Alabama	01	59 years	59	Hispanic or Latino	2135-2	Black or African American	2054-5	130
	Alabama	01	59 years	59	Hispanic or Latino	2135-2	White	2106-3	1257
	Alabama	01	59 years	59	Not Hispanic or Latino	2186-5	American Indian or Alaska Native	1002-5	491
	Alabama	01	59 years	59	Not Hispanic or Latino	2186-5	Asian or Pacific Islander	A-PI	854
	Alabama	01	59 years	59	Not Hispanic or Latino	2186-5	Black or African American	2054-5	17211
	Alabama	01	59 years	59	Not Hispanic or Latino	2186-5	White	2106-3	48196
	Alabama	01	60 years	60	Hispanic or Latino	2135-2	American Indian or Alaska Native	1002-5	30
	Alabama	01	60 years	60	Hispanic or Latino	2135-2	Asian or Pacific Islander	A-PI	17
	Alabama	01	60 years	60	Hispanic or Latino	2135-2	Black or African American	2054-5	101
	Alabama	01	60 years	60	Hispanic or Latino	2135-2	White	2106-3	1077
	Alabama	01	60 years	60	Not Hispanic or Latino	2186-5	American Indian or Alaska Native	1002-5	481
	Alabama	01	60 years	60	Not Hispanic or Latino	2186-5	Asian or Pacific Islander	A-PI	776
	Alabama	01	60 years	60	Not Hispanic or Latino	2186-5	Black or African American	2054-5	16573
	Alabama	01	60 years	60	Not Hispanic or Latino	2186-5	White	2106-3	46554
	Alabama	01	61 years	61	Hispanic or Latino	2135-2	American Indian or Alaska Native	1002-5	38
	Alabama	01	61 years	61	Hispanic or Latino	2135-2	Asian or Pacific Islander	A-PI	22
	Alabama	01	61 years	61	Hispanic or Latino	2135-2	Black or African American	2054-5	84
	Alabama	01	61 years	61	Hispanic or Latino	2135-2	White	2106-3	1007
	Alabama	01	61 years	61	Not Hispanic or Latino	2186-5	American Indian or Alaska Native	1002-5	481
	Alabama	01	61 years	61	Not Hispanic or Latino	2186-5	Asian or Pacific Islander	A-PI	746
	Alabama	01	61 years	61	Not Hispanic or Latino	2186-5	Black or African American	2054-5	16196
	Alabama	01	61 years	61	Not Hispanic or Latino	2186-5	White	2106-3	46640
	Alabama	01	62 years	62	Hispanic or Latino	2135-2	American Indian or Alaska Native	1002-5	36
	Alabama	01	62 years	62	Hispanic or Latino	2135-2	Asian or Pacific Islander	A-PI	18
	Alabama	01	62 years	62	Hispanic or Latino	2135-2	Black or African American	2054-5	128
	Alabama	01	62 years	62	Hispanic or Latino	2135-2	White	2106-3	982
	Alabama	01	62 years	62	Not Hispanic or Latino	2186-5	American Indian or Alaska Native	1002-5	458
	Alabama	01	62 years	62	Not Hispanic or Latino	2186-5	Asian or Pacific Islander	A-PI	736
	Alabama	01	62 years	62	Not Hispanic or Latino	2186-5	Black or African American	2054-5	16247
	Alabama	01	62 years	62	Not Hispanic or Latino	2186-5	White	2106-3	46760
	Alabama	01	63 years	63	Hispanic or Latino	2135-2	American Indian or Alaska Native	1002-5	34
	Alabama	01	63 years	63	Hispanic or Latino	2135-2	Asian or Pacific Islander	A-PI	15
	Alabama	01	63 years	63	Hispanic or Latino	2135-2	Black or African American	2054-5	106
	Alabama	01	63 years	63	Hispanic or Latino	2135-2	White	2106-3	909
	Alabama	01	63 years	63	Not Hispanic or Latino	2186-5	American Indian or Alaska Native	1002-5	453
	Alabama	01	63 years	63	Not Hispanic or Latino	2186-5	Asian or Pacific Islander	A-PI	712
	Alabama	01	63 years	63	Not Hispanic or Latino	2186-5	Black or African American	2054-5	15627
	Alabama	01	63 years	63	Not Hispanic or Latino	2186-5	White	2106-3	45261
	Alabama	01	64 years	64	Hispanic or Latino	2135-2	American Indian or Alaska Native	1002-5	27
	Alabama	01	64 years	64	Hispanic or Latino	2135-2	Asian or Pacific Islander	A-PI	20
	Alabama	01	64 years	64	Hispanic or Latino	2135-2	Black or African American	2054-5	99
	Alabama	01	64 years	64	Hispanic or Latino	2135-2	White	2106-3	825
	Alabama	01	64 years	64	Not Hispanic or Latino	2186-5	American Indian or Alaska Native	1002-5	457
	Alabama	01	64 years	64	Not Hispanic or Latino	2186-5	Asian or Pacific Islander	A-PI	664
	Alabama	01	64 years	64	Not Hispanic or Latino	2186-5	Black or African American	2054-5	15224
	Alabama	01	64 years	64	Not Hispanic or Latino	2186-5	White	2106-3	44726
	Alabama	01	65 years	65	Hispanic or Latino	2135-2	American Indian or Alaska Native	1002-5	25
	Alabama	01	65 years	65	Hispanic or Latino	2135-2	Asian or Pacific Islander	A-PI	9
	Alabama	01	65 years	65	Hispanic or Latino	2135-2	Black or African American	2054-5	104
	Alabama	01	65 years	65	Hispanic or Latino	2135-2	White	2106-3	720
	Alabama	01	65 years	65	Not Hispanic or Latino	2186-5	American Indian or Alaska Native	1002-5	405
	Alabama	01	65 years	65	Not Hispanic or Latino	2186-5	Asian or Pacific Islander	A-PI	637
	Alabama	01	65 years	65	Not Hispanic or Latino	2186-5	Black or African American	2054-5	14247
	Alabama	01	65 years	65	Not Hispanic or Latino	2186-5	White	2106-3	43437
	Alabama	01	66 years	66	Hispanic or Latino	2135-2	American Indian or Alaska Native	1002-5	24
	Alabama	01	66 years	66	Hispanic or Latino	2135-2	Asian or Pacific Islander	A-PI	8
	Alabama	01	66 years	66	Hispanic or Latino	2135-2	Black or African American	2054-5	77
	Alabama	01	66 years	66	Hispanic or Latino	2135-2	White	2106-3	647
	Alabama	01	66 years	66	Not Hispanic or Latino	2186-5	American Indian or Alaska Native	1002-5	402
	Alabama	01	66 years	66	Not Hispanic or Latino	2186-5	Asian or Pacific Islander	A-PI	600
	Alabama	01	66 years	66	Not Hispanic or Latino	2186-5	Black or African American	2054-5	13499
	Alabama	01	66 years	66	Not Hispanic or Latino	2186-5	White	2106-3	41509
	Alabama	01	67 years	67	Hispanic or Latino	2135-2	American Indian or Alaska Native	1002-5	22
	Alabama	01	67 years	67	Hispanic or Latino	2135-2	Asian or Pacific Islander	A-PI	6
	Alabama	01	67 years	67	Hispanic or Latino	2135-2	Black or African American	2054-5	41
	Alabama	01	67 years	67	Hispanic or Latino	2135-2	White	2106-3	618
	Alabama	01	67 years	67	Not Hispanic or Latino	2186-5	American Indian or Alaska Native	1002-5	370
	Alabama	01	67 years	67	Not Hispanic or Latino	2186-5	Asian or Pacific Islander	A-PI	626
	Alabama	01	67 years	67	Not Hispanic or Latino	2186-5	Black or African American	2054-5	12502
	Alabama	01	67 years	67	Not Hispanic or Latino	2186-5	White	2106-3	40509
	Alabama	01	68 years	68	Hispanic or Latino	2135-2	American Indian or Alaska Native	1002-5	12
	Alabama	01	68 years	68	Hispanic or Latino	2135-2	Asian or Pacific Islander	A-PI	11
	Alabama	01	68 years	68	Hispanic or Latino	2135-2	Black or African American	2054-5	52
	Alabama	01	68 years	68	Hispanic or Latino	2135-2	White	2106-3	597
	Alabama	01	68 years	68	Not Hispanic or Latino	2186-5	American Indian or Alaska Native	1002-5	339
	Alabama	01	68 years	68	Not Hispanic or Latino	2186-5	Asian or Pacific Islander	A-PI	587
	Alabama	01	68 years	68	Not Hispanic or Latino	2186-5	Black or African American	2054-5	12392
	Alabama	01	68 years	68	Not Hispanic or Latino	2186-5	White	2106-3	38707
	Alabama	01	69 years	69	Hispanic or Latino	2135-2	American Indian or Alaska Native	1002-5	6
	Alabama	01	69 years	69	Hispanic or Latino	2135-2	Asian or Pacific Islander	A-PI	9
	Alabama	01	69 years	69	Hispanic or Latino	2135-2	Black or African American	2054-5	65
	Alabama	01	69 years	69	Hispanic or Latino	2135-2	White	2106-3	523
	Alabama	01	69 years	69	Not Hispanic or Latino	2186-5	American Indian or Alaska Native	1002-5	341
	Alabama	01	69 years	69	Not Hispanic or Latino	2186-5	Asian or Pacific Islander	A-PI	592
	Alabama	01	69 years	69	Not Hispanic or Latino	2186-5	Black or African American	2054-5	11720
	Alabama	01	69 years	69	Not Hispanic or Latino	2186-5	White	2106-3	38451
	Alabama	01	70 years	70	Hispanic or Latino	2135-2	American Indian or Alaska Native	1002-5	16
	Alabama	01	70 years	70	Hispanic or Latino	2135-2	Asian or Pacific Islander	A-PI	4
	Alabama	01	70 years	70	Hispanic or Latino	2135-2	Black or African American	2054-5	67
	Alabama	01	70 years	70	Hispanic or Latino	2135-2	White	2106-3	511
	Alabama	01	70 years	70	Not Hispanic or Latino	2186-5	American Indian or Alaska Native	1002-5	311
	Alabama	01	70 years	70	Not Hispanic or Latino	2186-5	Asian or Pacific Islander	A-PI	496
	Alabama	01	70 years	70	Not Hispanic or Latino	2186-5	Black or African American	2054-5	10895
	Alabama	01	70 years	70	Not Hispanic or Latino	2186-5	White	2106-3	38267
	Alabama	01	71 years	71	Hispanic or Latino	2135-2	American Indian or Alaska Native	1002-5	17
	Alabama	01	71 years	71	Hispanic or Latino	2135-2	Asian or Pacific Islander	A-PI	9
	Alabama	01	71 years	71	Hispanic or Latino	2135-2	Black or African American	2054-5	60
	Alabama	01	71 years	71	Hispanic or Latino	2135-2	White	2106-3	476
	Alabama	01	71 years	71	Not Hispanic or Latino	2186-5	American Indian or Alaska Native	1002-5	335
	Alabama	01	71 years	71	Not Hispanic or Latino	2186-5	Asian or Pacific Islander	A-PI	454
	Alabama	01	71 years	71	Not Hispanic or Latino	2186-5	Black or African American	2054-5	9843
	Alabama	01	71 years	71	Not Hispanic or Latino	2186-5	White	2106-3	38690
	Alabama	01	72 years	72	Hispanic or Latino	2135-2	American Indian or Alaska Native	1002-5	10
	Alabama	01	72 years	72	Hispanic or Latino	2135-2	Asian or Pacific Islander	A-PI	15
	Alabama	01	72 years	72	Hispanic or Latino	2135-2	Black or African American	2054-5	48
	Alabama	01	72 years	72	Hispanic or Latino	2135-2	White	2106-3	442
	Alabama	01	72 years	72	Not Hispanic or Latino	2186-5	American Indian or Alaska Native	1002-5	345
	Alabama	01	72 years	72	Not Hispanic or Latino	2186-5	Asian or Pacific Islander	A-PI	427
	Alabama	01	72 years	72	Not Hispanic or Latino	2186-5	Black or African American	2054-5	9054
	Alabama	01	72 years	72	Not Hispanic or Latino	2186-5	White	2106-3	41271
	Alabama	01	73 years	73	Hispanic or Latino	2135-2	American Indian or Alaska Native	1002-5	9
	Alabama	01	73 years	73	Hispanic or Latino	2135-2	Asian or Pacific Islander	A-PI	11
	Alabama	01	73 years	73	Hispanic or Latino	2135-2	Black or African American	2054-5	27
	Alabama	01	73 years	73	Hispanic or Latino	2135-2	White	2106-3	382
	Alabama	01	73 years	73	Not Hispanic or Latino	2186-5	American Indian or Alaska Native	1002-5	249
	Alabama	01	73 years	73	Not Hispanic or Latino	2186-5	Asian or Pacific Islander	A-PI	372
	Alabama	01	73 years	73	Not Hispanic or Latino	2186-5	Black or African American	2054-5	7134
	Alabama	01	73 years	73	Not Hispanic or Latino	2186-5	White	2106-3	28907
	Alabama	01	74 years	74	Hispanic or Latino	2135-2	American Indian or Alaska Native	1002-5	14
	Alabama	01	74 years	74	Hispanic or Latino	2135-2	Asian or Pacific Islander	A-PI	8
	Alabama	01	74 years	74	Hispanic or Latino	2135-2	Black or African American	2054-5	50
	Alabama	01	74 years	74	Hispanic or Latino	2135-2	White	2106-3	358
	Alabama	01	74 years	74	Not Hispanic or Latino	2186-5	American Indian or Alaska Native	1002-5	226
	Alabama	01	74 years	74	Not Hispanic or Latino	2186-5	Asian or Pacific Islander	A-PI	341
	Alabama	01	74 years	74	Not Hispanic or Latino	2186-5	Black or African American	2054-5	6861
	Alabama	01	74 years	74	Not Hispanic or Latino	2186-5	White	2106-3	28987
	Alabama	01	75 years	75	Hispanic or Latino	2135-2	American Indian or Alaska Native	1002-5	8
	Alabama	01	75 years	75	Hispanic or Latino	2135-2	Asian or Pacific Islander	A-PI	4
	Alabama	01	75 years	75	Hispanic or Latino	2135-2	Black or African American	2054-5	31
	Alabama	01	75 years	75	Hispanic or Latino	2135-2	White	2106-3	331
	Alabama	01	75 years	75	Not Hispanic or Latino	2186-5	American Indian or Alaska Native	1002-5	215
	Alabama	01	75 years	75	Not Hispanic or Latino	2186-5	Asian or Pacific Islander	A-PI	314
	Alabama	01	75 years	75	Not Hispanic or Latino	2186-5	Black or African American	2054-5	6227
	Alabama	01	75 years	75	Not Hispanic or Latino	2186-5	White	2106-3	28311
	Alabama	01	76 years	76	Hispanic or Latino	2135-2	American Indian or Alaska Native	1002-5	5
	Alabama	01	76 years	76	Hispanic or Latino	2135-2	Asian or Pacific Islander	A-PI	7
	Alabama	01	76 years	76	Hispanic or Latino	2135-2	Black or African American	2054-5	38
	Alabama	01	76 years	76	Hispanic or Latino	2135-2	White	2106-3	313
	Alabama	01	76 years	76	Not Hispanic or Latino	2186-5	American Indian or Alaska Native	1002-5	223
	Alabama	01	76 years	76	Not Hispanic or Latino	2186-5	Asian or Pacific Islander	A-PI	269
	Alabama	01	76 years	76	Not Hispanic or Latino	2186-5	Black or African American	2054-5	5997
	Alabama	01	76 years	76	Not Hispanic or Latino	2186-5	White	2106-3	29321
	Alabama	01	77 years	77	Hispanic or Latino	2135-2	American Indian or Alaska Native	1002-5	9
	Alabama	01	77 years	77	Hispanic or Latino	2135-2	Asian or Pacific Islander	A-PI	9
	Alabama	01	77 years	77	Hispanic or Latino	2135-2	Black or African American	2054-5	35
	Alabama	01	77 years	77	Hispanic or Latino	2135-2	White	2106-3	271
	Alabama	01	77 years	77	Not Hispanic or Latino	2186-5	American Indian or Alaska Native	1002-5	173
	Alabama	01	77 years	77	Not Hispanic or Latino	2186-5	Asian or Pacific Islander	A-PI	270
	Alabama	01	77 years	77	Not Hispanic or Latino	2186-5	Black or African American	2054-5	5337
	Alabama	01	77 years	77	Not Hispanic or Latino	2186-5	White	2106-3	24471
	Alabama	01	78 years	78	Hispanic or Latino	2135-2	American Indian or Alaska Native	1002-5	7
	Alabama	01	78 years	78	Hispanic or Latino	2135-2	Asian or Pacific Islander	A-PI	2
	Alabama	01	78 years	78	Hispanic or Latino	2135-2	Black or African American	2054-5	25
	Alabama	01	78 years	78	Hispanic or Latino	2135-2	White	2106-3	259
	Alabama	01	78 years	78	Not Hispanic or Latino	2186-5	American Indian or Alaska Native	1002-5	151
	Alabama	01	78 years	78	Not Hispanic or Latino	2186-5	Asian or Pacific Islander	A-PI	217
	Alabama	01	78 years	78	Not Hispanic or Latino	2186-5	Black or African American	2054-5	4816
	Alabama	01	78 years	78	Not Hispanic or Latino	2186-5	White	2106-3	22095
	Alabama	01	79 years	79	Hispanic or Latino	2135-2	American Indian or Alaska Native	1002-5	4
	Alabama	01	79 years	79	Hispanic or Latino	2135-2	Asian or Pacific Islander	A-PI	3
	Alabama	01	79 years	79	Hispanic or Latino	2135-2	Black or African American	2054-5	21
	Alabama	01	79 years	79	Hispanic or Latino	2135-2	White	2106-3	237
	Alabama	01	79 years	79	Not Hispanic or Latino	2186-5	American Indian or Alaska Native	1002-5	143
	Alabama	01	79 years	79	Not Hispanic or Latino	2186-5	Asian or Pacific Islander	A-PI	193
	Alabama	01	79 years	79	Not Hispanic or Latino	2186-5	Black or African American	2054-5	4593
	Alabama	01	79 years	79	Not Hispanic or Latino	2186-5	White	2106-3	20859
	Alabama	01	80 years	80	Hispanic or Latino	2135-2	American Indian or Alaska Native	1002-5	5
	Alabama	01	80 years	80	Hispanic or Latino	2135-2	Asian or Pacific Islander	A-PI	2
	Alabama	01	80 years	80	Hispanic or Latino	2135-2	Black or African American	2054-5	39
	Alabama	01	80 years	80	Hispanic or Latino	2135-2	White	2106-3	216
	Alabama	01	80 years	80	Not Hispanic or Latino	2186-5	American Indian or Alaska Native	1002-5	129
	Alabama	01	80 years	80	Not Hispanic or Latino	2186-5	Asian or Pacific Islander	A-PI	197
	Alabama	01	80 years	80	Not Hispanic or Latino	2186-5	Black or African American	2054-5	4070
	Alabama	01	80 years	80	Not Hispanic or Latino	2186-5	White	2106-3	19319
	Alabama	01	81 years	81	Hispanic or Latino	2135-2	American Indian or Alaska Native	1002-5	2
	Alabama	01	81 years	81	Hispanic or Latino	2135-2	Asian or Pacific Islander	A-PI	1
	Alabama	01	81 years	81	Hispanic or Latino	2135-2	Black or African American	2054-5	35
	Alabama	01	81 years	81	Hispanic or Latino	2135-2	White	2106-3	218
	Alabama	01	81 years	81	Not Hispanic or Latino	2186-5	American Indian or Alaska Native	1002-5	97
	Alabama	01	81 years	81	Not Hispanic or Latino	2186-5	Asian or Pacific Islander	A-PI	158
	Alabama	01	81 years	81	Not Hispanic or Latino	2186-5	Black or African American	2054-5	3807
	Alabama	01	81 years	81	Not Hispanic or Latino	2186-5	White	2106-3	18262
	Alabama	01	82 years	82	Hispanic or Latino	2135-2	American Indian or Alaska Native	1002-5	3
	Alabama	01	82 years	82	Hispanic or Latino	2135-2	Asian or Pacific Islander	A-PI	3
	Alabama	01	82 years	82	Hispanic or Latino	2135-2	Black or African American	2054-5	19
	Alabama	01	82 years	82	Hispanic or Latino	2135-2	White	2106-3	178
	Alabama	01	82 years	82	Not Hispanic or Latino	2186-5	American Indian or Alaska Native	1002-5	77
	Alabama	01	82 years	82	Not Hispanic or Latino	2186-5	Asian or Pacific Islander	A-PI	154
	Alabama	01	82 years	82	Not Hispanic or Latino	2186-5	Black or African American	2054-5	3452
	Alabama	01	82 years	82	Not Hispanic or Latino	2186-5	White	2106-3	15708
	Alabama	01	83 years	83	Hispanic or Latino	2135-2	American Indian or Alaska Native	1002-5	4
	Alabama	01	83 years	83	Hispanic or Latino	2135-2	Asian or Pacific Islander	A-PI	4
	Alabama	01	83 years	83	Hispanic or Latino	2135-2	Black or African American	2054-5	23
	Alabama	01	83 years	83	Hispanic or Latino	2135-2	White	2106-3	172
	Alabama	01	83 years	83	Not Hispanic or Latino	2186-5	American Indian or Alaska Native	1002-5	81
	Alabama	01	83 years	83	Not Hispanic or Latino	2186-5	Asian or Pacific Islander	A-PI	147
	Alabama	01	83 years	83	Not Hispanic or Latino	2186-5	Black or African American	2054-5	3244
	Alabama	01	83 years	83	Not Hispanic or Latino	2186-5	White	2106-3	14547
	Alabama	01	84 years	84	Hispanic or Latino	2135-2	American Indian or Alaska Native	1002-5	4
	Alabama	01	84 years	84	Hispanic or Latino	2135-2	Asian or Pacific Islander	A-PI	2
	Alabama	01	84 years	84	Hispanic or Latino	2135-2	Black or African American	2054-5	5
	Alabama	01	84 years	84	Hispanic or Latino	2135-2	White	2106-3	170
	Alabama	01	84 years	84	Not Hispanic or Latino	2186-5	American Indian or Alaska Native	1002-5	73
	Alabama	01	84 years	84	Not Hispanic or Latino	2186-5	Asian or Pacific Islander	A-PI	123
	Alabama	01	84 years	84	Not Hispanic or Latino	2186-5	Black or African American	2054-5	2910
	Alabama	01	84 years	84	Not Hispanic or Latino	2186-5	White	2106-3	13373
	Alabama	01	85+ years	85+	Hispanic or Latino	2135-2	American Indian or Alaska Native	1002-5	26
	Alabama	01	85+ years	85+	Hispanic or Latino	2135-2	Asian or Pacific Islander	A-PI	16
	Alabama	01	85+ years	85+	Hispanic or Latino	2135-2	Black or African American	2054-5	94
	Alabama	01	85+ years	85+	Hispanic or Latino	2135-2	White	2106-3	1122
	Alabama	01	85+ years	85+	Not Hispanic or Latino	2186-5	American Indian or Alaska Native	1002-5	433
	Alabama	01	85+ years	85+	Not Hispanic or Latino	2186-5	Asian or Pacific Islander	A-PI	591
	Alabama	01	85+ years	85+	Not Hispanic or Latino	2186-5	Black or African American	2054-5	16528
	Alabama	01	85+ years	85+	Not Hispanic or Latino	2186-5	White	2106-3	72733
	Alaska	02	< 1 year	0	Hispanic or Latino	2135-2	American Indian or Alaska Native	1002-5	102
	Alaska	02	< 1 year	0	Hispanic or Latino	2135-2	Asian or Pacific Islander	A-PI	35
	Alaska	02	< 1 year	0	Hispanic or Latino	2135-2	Black or African American	2054-5	74
	Alaska	02	< 1 year	0	Hispanic or Latino	2135-2	White	2106-3	655
	Alaska	02	< 1 year	0	Not Hispanic or Latino	2186-5	American Indian or Alaska Native	1002-5	2202
	Alaska	02	< 1 year	0	Not Hispanic or Latino	2186-5	Asian or Pacific Islander	A-PI	744
	Alaska	02	< 1 year	0	Not Hispanic or Latino	2186-5	Black or African American	2054-5	623
	Alaska	02	< 1 year	0	Not Hispanic or Latino	2186-5	White	2106-3	5543
	Alaska	02	1 year	1	Hispanic or Latino	2135-2	American Indian or Alaska Native	1002-5	189
	Alaska	02	1 year	1	Hispanic or Latino	2135-2	Asian or Pacific Islander	A-PI	45
	Alaska	02	1 year	1	Hispanic or Latino	2135-2	Black or African American	2054-5	93
	Alaska	02	1 year	1	Hispanic or Latino	2135-2	White	2106-3	656
	Alaska	02	1 year	1	Not Hispanic or Latino	2186-5	American Indian or Alaska Native	1002-5	2163
	Alaska	02	1 year	1	Not Hispanic or Latino	2186-5	Asian or Pacific Islander	A-PI	730
	Alaska	02	1 year	1	Not Hispanic or Latino	2186-5	Black or African American	2054-5	574
	Alaska	02	1 year	1	Not Hispanic or Latino	2186-5	White	2106-3	5562
	Alaska	02	2 years	2	Hispanic or Latino	2135-2	American Indian or Alaska Native	1002-5	510
	Alaska	02	2 years	2	Hispanic or Latino	2135-2	Asian or Pacific Islander	A-PI	45
	Alaska	02	2 years	2	Hispanic or Latino	2135-2	Black or African American	2054-5	76
	Alaska	02	2 years	2	Hispanic or Latino	2135-2	White	2106-3	642
	Alaska	02	2 years	2	Not Hispanic or Latino	2186-5	American Indian or Alaska Native	1002-5	2151
	Alaska	02	2 years	2	Not Hispanic or Latino	2186-5	Asian or Pacific Islander	A-PI	750
	Alaska	02	2 years	2	Not Hispanic or Latino	2186-5	Black or African American	2054-5	576
	Alaska	02	2 years	2	Not Hispanic or Latino	2186-5	White	2106-3	5436
	Alaska	02	3 years	3	Hispanic or Latino	2135-2	American Indian or Alaska Native	1002-5	453
	Alaska	02	3 years	3	Hispanic or Latino	2135-2	Asian or Pacific Islander	A-PI	74
	Alaska	02	3 years	3	Hispanic or Latino	2135-2	Black or African American	2054-5	90
	Alaska	02	3 years	3	Hispanic or Latino	2135-2	White	2106-3	700
	Alaska	02	3 years	3	Not Hispanic or Latino	2186-5	American Indian or Alaska Native	1002-5	2148
	Alaska	02	3 years	3	Not Hispanic or Latino	2186-5	Asian or Pacific Islander	A-PI	792
	Alaska	02	3 years	3	Not Hispanic or Latino	2186-5	Black or African American	2054-5	563
	Alaska	02	3 years	3	Not Hispanic or Latino	2186-5	White	2106-3	5689
	Alaska	02	4 years	4	Hispanic or Latino	2135-2	American Indian or Alaska Native	1002-5	400
	Alaska	02	4 years	4	Hispanic or Latino	2135-2	Asian or Pacific Islander	A-PI	48
	Alaska	02	4 years	4	Hispanic or Latino	2135-2	Black or African American	2054-5	105
	Alaska	02	4 years	4	Hispanic or Latino	2135-2	White	2106-3	683
	Alaska	02	4 years	4	Not Hispanic or Latino	2186-5	American Indian or Alaska Native	1002-5	2144
	Alaska	02	4 years	4	Not Hispanic or Latino	2186-5	Asian or Pacific Islander	A-PI	804
	Alaska	02	4 years	4	Not Hispanic or Latino	2186-5	Black or African American	2054-5	593
	Alaska	02	4 years	4	Not Hispanic or Latino	2186-5	White	2106-3	5618
	Alaska	02	5 years	5	Hispanic or Latino	2135-2	American Indian or Alaska Native	1002-5	400
	Alaska	02	5 years	5	Hispanic or Latino	2135-2	Asian or Pacific Islander	A-PI	47
	Alaska	02	5 years	5	Hispanic or Latino	2135-2	Black or African American	2054-5	94
	Alaska	02	5 years	5	Hispanic or Latino	2135-2	White	2106-3	693
	Alaska	02	5 years	5	Not Hispanic or Latino	2186-5	American Indian or Alaska Native	1002-5	2235
	Alaska	02	5 years	5	Not Hispanic or Latino	2186-5	Asian or Pacific Islander	A-PI	816
	Alaska	02	5 years	5	Not Hispanic or Latino	2186-5	Black or African American	2054-5	539
	Alaska	02	5 years	5	Not Hispanic or Latino	2186-5	White	2106-3	5590
	Alaska	02	6 years	6	Hispanic or Latino	2135-2	American Indian or Alaska Native	1002-5	327
	Alaska	02	6 years	6	Hispanic or Latino	2135-2	Asian or Pacific Islander	A-PI	57
	Alaska	02	6 years	6	Hispanic or Latino	2135-2	Black or African American	2054-5	106
	Alaska	02	6 years	6	Hispanic or Latino	2135-2	White	2106-3	637
	Alaska	02	6 years	6	Not Hispanic or Latino	2186-5	American Indian or Alaska Native	1002-5	2299
	Alaska	02	6 years	6	Not Hispanic or Latino	2186-5	Asian or Pacific Islander	A-PI	784
	Alaska	02	6 years	6	Not Hispanic or Latino	2186-5	Black or African American	2054-5	551
	Alaska	02	6 years	6	Not Hispanic or Latino	2186-5	White	2106-3	5542
	Alaska	02	7 years	7	Hispanic or Latino	2135-2	American Indian or Alaska Native	1002-5	384
	Alaska	02	7 years	7	Hispanic or Latino	2135-2	Asian or Pacific Islander	A-PI	34
	Alaska	02	7 years	7	Hispanic or Latino	2135-2	Black or African American	2054-5	73
	Alaska	02	7 years	7	Hispanic or Latino	2135-2	White	2106-3	647
	Alaska	02	7 years	7	Not Hispanic or Latino	2186-5	American Indian or Alaska Native	1002-5	2362
	Alaska	02	7 years	7	Not Hispanic or Latino	2186-5	Asian or Pacific Islander	A-PI	772
	Alaska	02	7 years	7	Not Hispanic or Latino	2186-5	Black or African American	2054-5	550
	Alaska	02	7 years	7	Not Hispanic or Latino	2186-5	White	2106-3	5464
	Alaska	02	8 years	8	Hispanic or Latino	2135-2	American Indian or Alaska Native	1002-5	251
	Alaska	02	8 years	8	Hispanic or Latino	2135-2	Asian or Pacific Islander	A-PI	44
	Alaska	02	8 years	8	Hispanic or Latino	2135-2	Black or African American	2054-5	83
	Alaska	02	8 years	8	Hispanic or Latino	2135-2	White	2106-3	657
	Alaska	02	8 years	8	Not Hispanic or Latino	2186-5	American Indian or Alaska Native	1002-5	2566
	Alaska	02	8 years	8	Not Hispanic or Latino	2186-5	Asian or Pacific Islander	A-PI	816
	Alaska	02	8 years	8	Not Hispanic or Latino	2186-5	Black or African American	2054-5	546
	Alaska	02	8 years	8	Not Hispanic or Latino	2186-5	White	2106-3	5473
	Alaska	02	9 years	9	Hispanic or Latino	2135-2	American Indian or Alaska Native	1002-5	177
	Alaska	02	9 years	9	Hispanic or Latino	2135-2	Asian or Pacific Islander	A-PI	52
	Alaska	02	9 years	9	Hispanic or Latino	2135-2	Black or African American	2054-5	89
	Alaska	02	9 years	9	Hispanic or Latino	2135-2	White	2106-3	664
	Alaska	02	9 years	9	Not Hispanic or Latino	2186-5	American Indian or Alaska Native	1002-5	2173
	Alaska	02	9 years	9	Not Hispanic or Latino	2186-5	Asian or Pacific Islander	A-PI	813
	Alaska	02	9 years	9	Not Hispanic or Latino	2186-5	Black or African American	2054-5	558
	Alaska	02	9 years	9	Not Hispanic or Latino	2186-5	White	2106-3	5631
	Alaska	02	10 years	10	Hispanic or Latino	2135-2	American Indian or Alaska Native	1002-5	156
	Alaska	02	10 years	10	Hispanic or Latino	2135-2	Asian or Pacific Islander	A-PI	34
	Alaska	02	10 years	10	Hispanic or Latino	2135-2	Black or African American	2054-5	100
	Alaska	02	10 years	10	Hispanic or Latino	2135-2	White	2106-3	664
	Alaska	02	10 years	10	Not Hispanic or Latino	2186-5	American Indian or Alaska Native	1002-5	2185
	Alaska	02	10 years	10	Not Hispanic or Latino	2186-5	Asian or Pacific Islander	A-PI	882
	Alaska	02	10 years	10	Not Hispanic or Latino	2186-5	Black or African American	2054-5	555
	Alaska	02	10 years	10	Not Hispanic or Latino	2186-5	White	2106-3	5400
	Alaska	02	11 years	11	Hispanic or Latino	2135-2	American Indian or Alaska Native	1002-5	148
	Alaska	02	11 years	11	Hispanic or Latino	2135-2	Asian or Pacific Islander	A-PI	38
	Alaska	02	11 years	11	Hispanic or Latino	2135-2	Black or African American	2054-5	101
	Alaska	02	11 years	11	Hispanic or Latino	2135-2	White	2106-3	627
	Alaska	02	11 years	11	Not Hispanic or Latino	2186-5	American Indian or Alaska Native	1002-5	2160
	Alaska	02	11 years	11	Not Hispanic or Latino	2186-5	Asian or Pacific Islander	A-PI	917
	Alaska	02	11 years	11	Not Hispanic or Latino	2186-5	Black or African American	2054-5	556
	Alaska	02	11 years	11	Not Hispanic or Latino	2186-5	White	2106-3	5469
	Alaska	02	12 years	12	Hispanic or Latino	2135-2	American Indian or Alaska Native	1002-5	131
	Alaska	02	12 years	12	Hispanic or Latino	2135-2	Asian or Pacific Islander	A-PI	38
	Alaska	02	12 years	12	Hispanic or Latino	2135-2	Black or African American	2054-5	71
	Alaska	02	12 years	12	Hispanic or Latino	2135-2	White	2106-3	627
	Alaska	02	12 years	12	Not Hispanic or Latino	2186-5	American Indian or Alaska Native	1002-5	2098
	Alaska	02	12 years	12	Not Hispanic or Latino	2186-5	Asian or Pacific Islander	A-PI	882
	Alaska	02	12 years	12	Not Hispanic or Latino	2186-5	Black or African American	2054-5	543
	Alaska	02	12 years	12	Not Hispanic or Latino	2186-5	White	2106-3	5497
	Alaska	02	13 years	13	Hispanic or Latino	2135-2	American Indian or Alaska Native	1002-5	127
	Alaska	02	13 years	13	Hispanic or Latino	2135-2	Asian or Pacific Islander	A-PI	38
	Alaska	02	13 years	13	Hispanic or Latino	2135-2	Black or African American	2054-5	78
	Alaska	02	13 years	13	Hispanic or Latino	2135-2	White	2106-3	604
	Alaska	02	13 years	13	Not Hispanic or Latino	2186-5	American Indian or Alaska Native	1002-5	2034
	Alaska	02	13 years	13	Not Hispanic or Latino	2186-5	Asian or Pacific Islander	A-PI	907
	Alaska	02	13 years	13	Not Hispanic or Latino	2186-5	Black or African American	2054-5	539
	Alaska	02	13 years	13	Not Hispanic or Latino	2186-5	White	2106-3	5182
	Alaska	02	14 years	14	Hispanic or Latino	2135-2	American Indian or Alaska Native	1002-5	136
	Alaska	02	14 years	14	Hispanic or Latino	2135-2	Asian or Pacific Islander	A-PI	48
	Alaska	02	14 years	14	Hispanic or Latino	2135-2	Black or African American	2054-5	72
	Alaska	02	14 years	14	Hispanic or Latino	2135-2	White	2106-3	543
	Alaska	02	14 years	14	Not Hispanic or Latino	2186-5	American Indian or Alaska Native	1002-5	2061
	Alaska	02	14 years	14	Not Hispanic or Latino	2186-5	Asian or Pacific Islander	A-PI	967
	Alaska	02	14 years	14	Not Hispanic or Latino	2186-5	Black or African American	2054-5	505
	Alaska	02	14 years	14	Not Hispanic or Latino	2186-5	White	2106-3	5346
	Alaska	02	15 years	15	Hispanic or Latino	2135-2	American Indian or Alaska Native	1002-5	121
	Alaska	02	15 years	15	Hispanic or Latino	2135-2	Asian or Pacific Islander	A-PI	33
	Alaska	02	15 years	15	Hispanic or Latino	2135-2	Black or African American	2054-5	72
	Alaska	02	15 years	15	Hispanic or Latino	2135-2	White	2106-3	560
	Alaska	02	15 years	15	Not Hispanic or Latino	2186-5	American Indian or Alaska Native	1002-5	1958
	Alaska	02	15 years	15	Not Hispanic or Latino	2186-5	Asian or Pacific Islander	A-PI	951
	Alaska	02	15 years	15	Not Hispanic or Latino	2186-5	Black or African American	2054-5	505
	Alaska	02	15 years	15	Not Hispanic or Latino	2186-5	White	2106-3	5288
	Alaska	02	16 years	16	Hispanic or Latino	2135-2	American Indian or Alaska Native	1002-5	123
	Alaska	02	16 years	16	Hispanic or Latino	2135-2	Asian or Pacific Islander	A-PI	25
	Alaska	02	16 years	16	Hispanic or Latino	2135-2	Black or African American	2054-5	62
	Alaska	02	16 years	16	Hispanic or Latino	2135-2	White	2106-3	538
	Alaska	02	16 years	16	Not Hispanic or Latino	2186-5	American Indian or Alaska Native	1002-5	1951
	Alaska	02	16 years	16	Not Hispanic or Latino	2186-5	Asian or Pacific Islander	A-PI	1020
	Alaska	02	16 years	16	Not Hispanic or Latino	2186-5	Black or African American	2054-5	469
	Alaska	02	16 years	16	Not Hispanic or Latino	2186-5	White	2106-3	5222
	Alaska	02	17 years	17	Hispanic or Latino	2135-2	American Indian or Alaska Native	1002-5	125
	Alaska	02	17 years	17	Hispanic or Latino	2135-2	Asian or Pacific Islander	A-PI	29
	Alaska	02	17 years	17	Hispanic or Latino	2135-2	Black or African American	2054-5	84
	Alaska	02	17 years	17	Hispanic or Latino	2135-2	White	2106-3	517
	Alaska	02	17 years	17	Not Hispanic or Latino	2186-5	American Indian or Alaska Native	1002-5	1992
	Alaska	02	17 years	17	Not Hispanic or Latino	2186-5	Asian or Pacific Islander	A-PI	983
	Alaska	02	17 years	17	Not Hispanic or Latino	2186-5	Black or African American	2054-5	495
	Alaska	02	17 years	17	Not Hispanic or Latino	2186-5	White	2106-3	5118
	Alaska	02	18 years	18	Hispanic or Latino	2135-2	American Indian or Alaska Native	1002-5	138
	Alaska	02	18 years	18	Hispanic or Latino	2135-2	Asian or Pacific Islander	A-PI	23
	Alaska	02	18 years	18	Hispanic or Latino	2135-2	Black or African American	2054-5	56
	Alaska	02	18 years	18	Hispanic or Latino	2135-2	White	2106-3	528
	Alaska	02	18 years	18	Not Hispanic or Latino	2186-5	American Indian or Alaska Native	1002-5	1941
	Alaska	02	18 years	18	Not Hispanic or Latino	2186-5	Asian or Pacific Islander	A-PI	807
	Alaska	02	18 years	18	Not Hispanic or Latino	2186-5	Black or African American	2054-5	477
	Alaska	02	18 years	18	Not Hispanic or Latino	2186-5	White	2106-3	4634
	Alaska	02	19 years	19	Hispanic or Latino	2135-2	American Indian or Alaska Native	1002-5	121
	Alaska	02	19 years	19	Hispanic or Latino	2135-2	Asian or Pacific Islander	A-PI	24
	Alaska	02	19 years	19	Hispanic or Latino	2135-2	Black or African American	2054-5	67
	Alaska	02	19 years	19	Hispanic or Latino	2135-2	White	2106-3	591
	Alaska	02	19 years	19	Not Hispanic or Latino	2186-5	American Indian or Alaska Native	1002-5	1894
	Alaska	02	19 years	19	Not Hispanic or Latino	2186-5	Asian or Pacific Islander	A-PI	732
	Alaska	02	19 years	19	Not Hispanic or Latino	2186-5	Black or African American	2054-5	538
	Alaska	02	19 years	19	Not Hispanic or Latino	2186-5	White	2106-3	4298
	Alaska	02	20 years	20	Hispanic or Latino	2135-2	American Indian or Alaska Native	1002-5	104
	Alaska	02	20 years	20	Hispanic or Latino	2135-2	Asian or Pacific Islander	A-PI	42
	Alaska	02	20 years	20	Hispanic or Latino	2135-2	Black or African American	2054-5	91
	Alaska	02	20 years	20	Hispanic or Latino	2135-2	White	2106-3	736
	Alaska	02	20 years	20	Not Hispanic or Latino	2186-5	American Indian or Alaska Native	1002-5	1874
	Alaska	02	20 years	20	Not Hispanic or Latino	2186-5	Asian or Pacific Islander	A-PI	787
	Alaska	02	20 years	20	Not Hispanic or Latino	2186-5	Black or African American	2054-5	661
	Alaska	02	20 years	20	Not Hispanic or Latino	2186-5	White	2106-3	5078
	Alaska	02	21 years	21	Hispanic or Latino	2135-2	American Indian or Alaska Native	1002-5	110
	Alaska	02	21 years	21	Hispanic or Latino	2135-2	Asian or Pacific Islander	A-PI	31
	Alaska	02	21 years	21	Hispanic or Latino	2135-2	Black or African American	2054-5	87
	Alaska	02	21 years	21	Hispanic or Latino	2135-2	White	2106-3	849
	Alaska	02	21 years	21	Not Hispanic or Latino	2186-5	American Indian or Alaska Native	1002-5	1888
	Alaska	02	21 years	21	Not Hispanic or Latino	2186-5	Asian or Pacific Islander	A-PI	829
	Alaska	02	21 years	21	Not Hispanic or Latino	2186-5	Black or African American	2054-5	690
	Alaska	02	21 years	21	Not Hispanic or Latino	2186-5	White	2106-3	5467
	Alaska	02	22 years	22	Hispanic or Latino	2135-2	American Indian or Alaska Native	1002-5	118
	Alaska	02	22 years	22	Hispanic or Latino	2135-2	Asian or Pacific Islander	A-PI	36
	Alaska	02	22 years	22	Hispanic or Latino	2135-2	Black or African American	2054-5	76
	Alaska	02	22 years	22	Hispanic or Latino	2135-2	White	2106-3	858
	Alaska	02	22 years	22	Not Hispanic or Latino	2186-5	American Indian or Alaska Native	1002-5	1866
	Alaska	02	22 years	22	Not Hispanic or Latino	2186-5	Asian or Pacific Islander	A-PI	952
	Alaska	02	22 years	22	Not Hispanic or Latino	2186-5	Black or African American	2054-5	719
	Alaska	02	22 years	22	Not Hispanic or Latino	2186-5	White	2106-3	5751
	Alaska	02	23 years	23	Hispanic or Latino	2135-2	American Indian or Alaska Native	1002-5	118
	Alaska	02	23 years	23	Hispanic or Latino	2135-2	Asian or Pacific Islander	A-PI	26
	Alaska	02	23 years	23	Hispanic or Latino	2135-2	Black or African American	2054-5	81
	Alaska	02	23 years	23	Hispanic or Latino	2135-2	White	2106-3	822
	Alaska	02	23 years	23	Not Hispanic or Latino	2186-5	American Indian or Alaska Native	1002-5	1786
	Alaska	02	23 years	23	Not Hispanic or Latino	2186-5	Asian or Pacific Islander	A-PI	979
	Alaska	02	23 years	23	Not Hispanic or Latino	2186-5	Black or African American	2054-5	650
	Alaska	02	23 years	23	Not Hispanic or Latino	2186-5	White	2106-3	6006
	Alaska	02	24 years	24	Hispanic or Latino	2135-2	American Indian or Alaska Native	1002-5	108
	Alaska	02	24 years	24	Hispanic or Latino	2135-2	Asian or Pacific Islander	A-PI	41
	Alaska	02	24 years	24	Hispanic or Latino	2135-2	Black or African American	2054-5	70
	Alaska	02	24 years	24	Hispanic or Latino	2135-2	White	2106-3	874
	Alaska	02	24 years	24	Not Hispanic or Latino	2186-5	American Indian or Alaska Native	1002-5	1739
	Alaska	02	24 years	24	Not Hispanic or Latino	2186-5	Asian or Pacific Islander	A-PI	1071
	Alaska	02	24 years	24	Not Hispanic or Latino	2186-5	Black or African American	2054-5	712
	Alaska	02	24 years	24	Not Hispanic or Latino	2186-5	White	2106-3	6500
	Alaska	02	25 years	25	Hispanic or Latino	2135-2	American Indian or Alaska Native	1002-5	113
	Alaska	02	25 years	25	Hispanic or Latino	2135-2	Asian or Pacific Islander	A-PI	38
	Alaska	02	25 years	25	Hispanic or Latino	2135-2	Black or African American	2054-5	78
	Alaska	02	25 years	25	Hispanic or Latino	2135-2	White	2106-3	838
	Alaska	02	25 years	25	Not Hispanic or Latino	2186-5	American Indian or Alaska Native	1002-5	1895
	Alaska	02	25 years	25	Not Hispanic or Latino	2186-5	Asian or Pacific Islander	A-PI	1119
	Alaska	02	25 years	25	Not Hispanic or Latino	2186-5	Black or African American	2054-5	679
	Alaska	02	25 years	25	Not Hispanic or Latino	2186-5	White	2106-3	6734
	Alaska	02	26 years	26	Hispanic or Latino	2135-2	American Indian or Alaska Native	1002-5	107
	Alaska	02	26 years	26	Hispanic or Latino	2135-2	Asian or Pacific Islander	A-PI	40
	Alaska	02	26 years	26	Hispanic or Latino	2135-2	Black or African American	2054-5	77
	Alaska	02	26 years	26	Hispanic or Latino	2135-2	White	2106-3	877
	Alaska	02	26 years	26	Not Hispanic or Latino	2186-5	American Indian or Alaska Native	1002-5	1925
	Alaska	02	26 years	26	Not Hispanic or Latino	2186-5	Asian or Pacific Islander	A-PI	1135
	Alaska	02	26 years	26	Not Hispanic or Latino	2186-5	Black or African American	2054-5	707
	Alaska	02	26 years	26	Not Hispanic or Latino	2186-5	White	2106-3	6859
	Alaska	02	27 years	27	Hispanic or Latino	2135-2	American Indian or Alaska Native	1002-5	129
	Alaska	02	27 years	27	Hispanic or Latino	2135-2	Asian or Pacific Islander	A-PI	45
	Alaska	02	27 years	27	Hispanic or Latino	2135-2	Black or African American	2054-5	78
	Alaska	02	27 years	27	Hispanic or Latino	2135-2	White	2106-3	873
	Alaska	02	27 years	27	Not Hispanic or Latino	2186-5	American Indian or Alaska Native	1002-5	2058
	Alaska	02	27 years	27	Not Hispanic or Latino	2186-5	Asian or Pacific Islander	A-PI	1179
	Alaska	02	27 years	27	Not Hispanic or Latino	2186-5	Black or African American	2054-5	655
	Alaska	02	27 years	27	Not Hispanic or Latino	2186-5	White	2106-3	7373
	Alaska	02	28 years	28	Hispanic or Latino	2135-2	American Indian or Alaska Native	1002-5	117
	Alaska	02	28 years	28	Hispanic or Latino	2135-2	Asian or Pacific Islander	A-PI	50
	Alaska	02	28 years	28	Hispanic or Latino	2135-2	Black or African American	2054-5	90
	Alaska	02	28 years	28	Hispanic or Latino	2135-2	White	2106-3	785
	Alaska	02	28 years	28	Not Hispanic or Latino	2186-5	American Indian or Alaska Native	1002-5	2072
	Alaska	02	28 years	28	Not Hispanic or Latino	2186-5	Asian or Pacific Islander	A-PI	1185
	Alaska	02	28 years	28	Not Hispanic or Latino	2186-5	Black or African American	2054-5	619
	Alaska	02	28 years	28	Not Hispanic or Latino	2186-5	White	2106-3	7508
	Alaska	02	29 years	29	Hispanic or Latino	2135-2	American Indian or Alaska Native	1002-5	98
	Alaska	02	29 years	29	Hispanic or Latino	2135-2	Asian or Pacific Islander	A-PI	40
	Alaska	02	29 years	29	Hispanic or Latino	2135-2	Black or African American	2054-5	95
	Alaska	02	29 years	29	Hispanic or Latino	2135-2	White	2106-3	773
	Alaska	02	29 years	29	Not Hispanic or Latino	2186-5	American Indian or Alaska Native	1002-5	2131
	Alaska	02	29 years	29	Not Hispanic or Latino	2186-5	Asian or Pacific Islander	A-PI	1140
	Alaska	02	29 years	29	Not Hispanic or Latino	2186-5	Black or African American	2054-5	599
	Alaska	02	29 years	29	Not Hispanic or Latino	2186-5	White	2106-3	7514
	Alaska	02	30 years	30	Hispanic or Latino	2135-2	American Indian or Alaska Native	1002-5	96
	Alaska	02	30 years	30	Hispanic or Latino	2135-2	Asian or Pacific Islander	A-PI	41
	Alaska	02	30 years	30	Hispanic or Latino	2135-2	Black or African American	2054-5	72
	Alaska	02	30 years	30	Hispanic or Latino	2135-2	White	2106-3	771
	Alaska	02	30 years	30	Not Hispanic or Latino	2186-5	American Indian or Alaska Native	1002-5	1943
	Alaska	02	30 years	30	Not Hispanic or Latino	2186-5	Asian or Pacific Islander	A-PI	1092
	Alaska	02	30 years	30	Not Hispanic or Latino	2186-5	Black or African American	2054-5	596
	Alaska	02	30 years	30	Not Hispanic or Latino	2186-5	White	2106-3	7076
	Alaska	02	31 years	31	Hispanic or Latino	2135-2	American Indian or Alaska Native	1002-5	83
	Alaska	02	31 years	31	Hispanic or Latino	2135-2	Asian or Pacific Islander	A-PI	44
	Alaska	02	31 years	31	Hispanic or Latino	2135-2	Black or African American	2054-5	77
	Alaska	02	31 years	31	Hispanic or Latino	2135-2	White	2106-3	828
	Alaska	02	31 years	31	Not Hispanic or Latino	2186-5	American Indian or Alaska Native	1002-5	1892
	Alaska	02	31 years	31	Not Hispanic or Latino	2186-5	Asian or Pacific Islander	A-PI	1029
	Alaska	02	31 years	31	Not Hispanic or Latino	2186-5	Black or African American	2054-5	527
	Alaska	02	31 years	31	Not Hispanic or Latino	2186-5	White	2106-3	7041
	Alaska	02	32 years	32	Hispanic or Latino	2135-2	American Indian or Alaska Native	1002-5	84
	Alaska	02	32 years	32	Hispanic or Latino	2135-2	Asian or Pacific Islander	A-PI	35
	Alaska	02	32 years	32	Hispanic or Latino	2135-2	Black or African American	2054-5	74
	Alaska	02	32 years	32	Hispanic or Latino	2135-2	White	2106-3	739
	Alaska	02	32 years	32	Not Hispanic or Latino	2186-5	American Indian or Alaska Native	1002-5	1748
	Alaska	02	32 years	32	Not Hispanic or Latino	2186-5	Asian or Pacific Islander	A-PI	1028
	Alaska	02	32 years	32	Not Hispanic or Latino	2186-5	Black or African American	2054-5	480
	Alaska	02	32 years	32	Not Hispanic or Latino	2186-5	White	2106-3	6924
	Alaska	02	33 years	33	Hispanic or Latino	2135-2	American Indian or Alaska Native	1002-5	107
	Alaska	02	33 years	33	Hispanic or Latino	2135-2	Asian or Pacific Islander	A-PI	34
	Alaska	02	33 years	33	Hispanic or Latino	2135-2	Black or African American	2054-5	72
	Alaska	02	33 years	33	Hispanic or Latino	2135-2	White	2106-3	788
	Alaska	02	33 years	33	Not Hispanic or Latino	2186-5	American Indian or Alaska Native	1002-5	1764
	Alaska	02	33 years	33	Not Hispanic or Latino	2186-5	Asian or Pacific Islander	A-PI	1026
	Alaska	02	33 years	33	Not Hispanic or Latino	2186-5	Black or African American	2054-5	481
	Alaska	02	33 years	33	Not Hispanic or Latino	2186-5	White	2106-3	7155
	Alaska	02	34 years	34	Hispanic or Latino	2135-2	American Indian or Alaska Native	1002-5	92
	Alaska	02	34 years	34	Hispanic or Latino	2135-2	Asian or Pacific Islander	A-PI	37
	Alaska	02	34 years	34	Hispanic or Latino	2135-2	Black or African American	2054-5	66
	Alaska	02	34 years	34	Hispanic or Latino	2135-2	White	2106-3	713
	Alaska	02	34 years	34	Not Hispanic or Latino	2186-5	American Indian or Alaska Native	1002-5	1695
	Alaska	02	34 years	34	Not Hispanic or Latino	2186-5	Asian or Pacific Islander	A-PI	951
	Alaska	02	34 years	34	Not Hispanic or Latino	2186-5	Black or African American	2054-5	481
	Alaska	02	34 years	34	Not Hispanic or Latino	2186-5	White	2106-3	7379
	Alaska	02	35 years	35	Hispanic or Latino	2135-2	American Indian or Alaska Native	1002-5	99
	Alaska	02	35 years	35	Hispanic or Latino	2135-2	Asian or Pacific Islander	A-PI	21
	Alaska	02	35 years	35	Hispanic or Latino	2135-2	Black or African American	2054-5	55
	Alaska	02	35 years	35	Hispanic or Latino	2135-2	White	2106-3	722
	Alaska	02	35 years	35	Not Hispanic or Latino	2186-5	American Indian or Alaska Native	1002-5	1664
	Alaska	02	35 years	35	Not Hispanic or Latino	2186-5	Asian or Pacific Islander	A-PI	884
	Alaska	02	35 years	35	Not Hispanic or Latino	2186-5	Black or African American	2054-5	467
	Alaska	02	35 years	35	Not Hispanic or Latino	2186-5	White	2106-3	6925
	Alaska	02	36 years	36	Hispanic or Latino	2135-2	American Indian or Alaska Native	1002-5	88
	Alaska	02	36 years	36	Hispanic or Latino	2135-2	Asian or Pacific Islander	A-PI	38
	Alaska	02	36 years	36	Hispanic or Latino	2135-2	Black or African American	2054-5	63
	Alaska	02	36 years	36	Hispanic or Latino	2135-2	White	2106-3	706
	Alaska	02	36 years	36	Not Hispanic or Latino	2186-5	American Indian or Alaska Native	1002-5	1620
	Alaska	02	36 years	36	Not Hispanic or Latino	2186-5	Asian or Pacific Islander	A-PI	919
	Alaska	02	36 years	36	Not Hispanic or Latino	2186-5	Black or African American	2054-5	503
	Alaska	02	36 years	36	Not Hispanic or Latino	2186-5	White	2106-3	7053
	Alaska	02	37 years	37	Hispanic or Latino	2135-2	American Indian or Alaska Native	1002-5	98
	Alaska	02	37 years	37	Hispanic or Latino	2135-2	Asian or Pacific Islander	A-PI	27
	Alaska	02	37 years	37	Hispanic or Latino	2135-2	Black or African American	2054-5	52
	Alaska	02	37 years	37	Hispanic or Latino	2135-2	White	2106-3	602
	Alaska	02	37 years	37	Not Hispanic or Latino	2186-5	American Indian or Alaska Native	1002-5	1506
	Alaska	02	37 years	37	Not Hispanic or Latino	2186-5	Asian or Pacific Islander	A-PI	913
	Alaska	02	37 years	37	Not Hispanic or Latino	2186-5	Black or African American	2054-5	455
	Alaska	02	37 years	37	Not Hispanic or Latino	2186-5	White	2106-3	6768
	Alaska	02	38 years	38	Hispanic or Latino	2135-2	American Indian or Alaska Native	1002-5	75
	Alaska	02	38 years	38	Hispanic or Latino	2135-2	Asian or Pacific Islander	A-PI	38
	Alaska	02	38 years	38	Hispanic or Latino	2135-2	Black or African American	2054-5	43
	Alaska	02	38 years	38	Hispanic or Latino	2135-2	White	2106-3	646
	Alaska	02	38 years	38	Not Hispanic or Latino	2186-5	American Indian or Alaska Native	1002-5	1415
	Alaska	02	38 years	38	Not Hispanic or Latino	2186-5	Asian or Pacific Islander	A-PI	836
	Alaska	02	38 years	38	Not Hispanic or Latino	2186-5	Black or African American	2054-5	436
	Alaska	02	38 years	38	Not Hispanic or Latino	2186-5	White	2106-3	6627
	Alaska	02	39 years	39	Hispanic or Latino	2135-2	American Indian or Alaska Native	1002-5	77
	Alaska	02	39 years	39	Hispanic or Latino	2135-2	Asian or Pacific Islander	A-PI	27
	Alaska	02	39 years	39	Hispanic or Latino	2135-2	Black or African American	2054-5	45
	Alaska	02	39 years	39	Hispanic or Latino	2135-2	White	2106-3	629
	Alaska	02	39 years	39	Not Hispanic or Latino	2186-5	American Indian or Alaska Native	1002-5	1452
	Alaska	02	39 years	39	Not Hispanic or Latino	2186-5	Asian or Pacific Islander	A-PI	882
	Alaska	02	39 years	39	Not Hispanic or Latino	2186-5	Black or African American	2054-5	414
	Alaska	02	39 years	39	Not Hispanic or Latino	2186-5	White	2106-3	6531
	Alaska	02	40 years	40	Hispanic or Latino	2135-2	American Indian or Alaska Native	1002-5	83
	Alaska	02	40 years	40	Hispanic or Latino	2135-2	Asian or Pacific Islander	A-PI	22
	Alaska	02	40 years	40	Hispanic or Latino	2135-2	Black or African American	2054-5	43
	Alaska	02	40 years	40	Hispanic or Latino	2135-2	White	2106-3	523
	Alaska	02	40 years	40	Not Hispanic or Latino	2186-5	American Indian or Alaska Native	1002-5	1347
	Alaska	02	40 years	40	Not Hispanic or Latino	2186-5	Asian or Pacific Islander	A-PI	841
	Alaska	02	40 years	40	Not Hispanic or Latino	2186-5	Black or African American	2054-5	357
	Alaska	02	40 years	40	Not Hispanic or Latino	2186-5	White	2106-3	5950
	Alaska	02	41 years	41	Hispanic or Latino	2135-2	American Indian or Alaska Native	1002-5	84
	Alaska	02	41 years	41	Hispanic or Latino	2135-2	Asian or Pacific Islander	A-PI	25
	Alaska	02	41 years	41	Hispanic or Latino	2135-2	Black or African American	2054-5	51
	Alaska	02	41 years	41	Hispanic or Latino	2135-2	White	2106-3	485
	Alaska	02	41 years	41	Not Hispanic or Latino	2186-5	American Indian or Alaska Native	1002-5	1244
	Alaska	02	41 years	41	Not Hispanic or Latino	2186-5	Asian or Pacific Islander	A-PI	799
	Alaska	02	41 years	41	Not Hispanic or Latino	2186-5	Black or African American	2054-5	355
	Alaska	02	41 years	41	Not Hispanic or Latino	2186-5	White	2106-3	5814
	Alaska	02	42 years	42	Hispanic or Latino	2135-2	American Indian or Alaska Native	1002-5	71
	Alaska	02	42 years	42	Hispanic or Latino	2135-2	Asian or Pacific Islander	A-PI	28
	Alaska	02	42 years	42	Hispanic or Latino	2135-2	Black or African American	2054-5	45
	Alaska	02	42 years	42	Hispanic or Latino	2135-2	White	2106-3	494
	Alaska	02	42 years	42	Not Hispanic or Latino	2186-5	American Indian or Alaska Native	1002-5	1218
	Alaska	02	42 years	42	Not Hispanic or Latino	2186-5	Asian or Pacific Islander	A-PI	786
	Alaska	02	42 years	42	Not Hispanic or Latino	2186-5	Black or African American	2054-5	349
	Alaska	02	42 years	42	Not Hispanic or Latino	2186-5	White	2106-3	5756
	Alaska	02	43 years	43	Hispanic or Latino	2135-2	American Indian or Alaska Native	1002-5	50
	Alaska	02	43 years	43	Hispanic or Latino	2135-2	Asian or Pacific Islander	A-PI	23
	Alaska	02	43 years	43	Hispanic or Latino	2135-2	Black or African American	2054-5	41
	Alaska	02	43 years	43	Hispanic or Latino	2135-2	White	2106-3	483
	Alaska	02	43 years	43	Not Hispanic or Latino	2186-5	American Indian or Alaska Native	1002-5	1198
	Alaska	02	43 years	43	Not Hispanic or Latino	2186-5	Asian or Pacific Islander	A-PI	739
	Alaska	02	43 years	43	Not Hispanic or Latino	2186-5	Black or African American	2054-5	315
	Alaska	02	43 years	43	Not Hispanic or Latino	2186-5	White	2106-3	5297
	Alaska	02	44 years	44	Hispanic or Latino	2135-2	American Indian or Alaska Native	1002-5	50
	Alaska	02	44 years	44	Hispanic or Latino	2135-2	Asian or Pacific Islander	A-PI	30
	Alaska	02	44 years	44	Hispanic or Latino	2135-2	Black or African American	2054-5	29
	Alaska	02	44 years	44	Hispanic or Latino	2135-2	White	2106-3	490
	Alaska	02	44 years	44	Not Hispanic or Latino	2186-5	American Indian or Alaska Native	1002-5	1246
	Alaska	02	44 years	44	Not Hispanic or Latino	2186-5	Asian or Pacific Islander	A-PI	783
	Alaska	02	44 years	44	Not Hispanic or Latino	2186-5	Black or African American	2054-5	320
	Alaska	02	44 years	44	Not Hispanic or Latino	2186-5	White	2106-3	5480
	Alaska	02	45 years	45	Hispanic or Latino	2135-2	American Indian or Alaska Native	1002-5	62
	Alaska	02	45 years	45	Hispanic or Latino	2135-2	Asian or Pacific Islander	A-PI	15
	Alaska	02	45 years	45	Hispanic or Latino	2135-2	Black or African American	2054-5	37
	Alaska	02	45 years	45	Hispanic or Latino	2135-2	White	2106-3	429
	Alaska	02	45 years	45	Not Hispanic or Latino	2186-5	American Indian or Alaska Native	1002-5	1168
	Alaska	02	45 years	45	Not Hispanic or Latino	2186-5	Asian or Pacific Islander	A-PI	768
	Alaska	02	45 years	45	Not Hispanic or Latino	2186-5	Black or African American	2054-5	313
	Alaska	02	45 years	45	Not Hispanic or Latino	2186-5	White	2106-3	5177
	Alaska	02	46 years	46	Hispanic or Latino	2135-2	American Indian or Alaska Native	1002-5	53
	Alaska	02	46 years	46	Hispanic or Latino	2135-2	Asian or Pacific Islander	A-PI	20
	Alaska	02	46 years	46	Hispanic or Latino	2135-2	Black or African American	2054-5	26
	Alaska	02	46 years	46	Hispanic or Latino	2135-2	White	2106-3	386
	Alaska	02	46 years	46	Not Hispanic or Latino	2186-5	American Indian or Alaska Native	1002-5	1176
	Alaska	02	46 years	46	Not Hispanic or Latino	2186-5	Asian or Pacific Islander	A-PI	797
	Alaska	02	46 years	46	Not Hispanic or Latino	2186-5	Black or African American	2054-5	323
	Alaska	02	46 years	46	Not Hispanic or Latino	2186-5	White	2106-3	5296
	Alaska	02	47 years	47	Hispanic or Latino	2135-2	American Indian or Alaska Native	1002-5	53
	Alaska	02	47 years	47	Hispanic or Latino	2135-2	Asian or Pacific Islander	A-PI	13
	Alaska	02	47 years	47	Hispanic or Latino	2135-2	Black or African American	2054-5	34
	Alaska	02	47 years	47	Hispanic or Latino	2135-2	White	2106-3	409
	Alaska	02	47 years	47	Not Hispanic or Latino	2186-5	American Indian or Alaska Native	1002-5	1093
	Alaska	02	47 years	47	Not Hispanic or Latino	2186-5	Asian or Pacific Islander	A-PI	793
	Alaska	02	47 years	47	Not Hispanic or Latino	2186-5	Black or African American	2054-5	309
	Alaska	02	47 years	47	Not Hispanic or Latino	2186-5	White	2106-3	5641
	Alaska	02	48 years	48	Hispanic or Latino	2135-2	American Indian or Alaska Native	1002-5	59
	Alaska	02	48 years	48	Hispanic or Latino	2135-2	Asian or Pacific Islander	A-PI	18
	Alaska	02	48 years	48	Hispanic or Latino	2135-2	Black or African American	2054-5	49
	Alaska	02	48 years	48	Hispanic or Latino	2135-2	White	2106-3	408
	Alaska	02	48 years	48	Not Hispanic or Latino	2186-5	American Indian or Alaska Native	1002-5	1187
	Alaska	02	48 years	48	Not Hispanic or Latino	2186-5	Asian or Pacific Islander	A-PI	761
	Alaska	02	48 years	48	Not Hispanic or Latino	2186-5	Black or African American	2054-5	308
	Alaska	02	48 years	48	Not Hispanic or Latino	2186-5	White	2106-3	5984
	Alaska	02	49 years	49	Hispanic or Latino	2135-2	American Indian or Alaska Native	1002-5	47
	Alaska	02	49 years	49	Hispanic or Latino	2135-2	Asian or Pacific Islander	A-PI	20
	Alaska	02	49 years	49	Hispanic or Latino	2135-2	Black or African American	2054-5	51
	Alaska	02	49 years	49	Hispanic or Latino	2135-2	White	2106-3	436
	Alaska	02	49 years	49	Not Hispanic or Latino	2186-5	American Indian or Alaska Native	1002-5	1175
	Alaska	02	49 years	49	Not Hispanic or Latino	2186-5	Asian or Pacific Islander	A-PI	857
	Alaska	02	49 years	49	Not Hispanic or Latino	2186-5	Black or African American	2054-5	306
	Alaska	02	49 years	49	Not Hispanic or Latino	2186-5	White	2106-3	6246
	Alaska	02	50 years	50	Hispanic or Latino	2135-2	American Indian or Alaska Native	1002-5	50
	Alaska	02	50 years	50	Hispanic or Latino	2135-2	Asian or Pacific Islander	A-PI	13
	Alaska	02	50 years	50	Hispanic or Latino	2135-2	Black or African American	2054-5	36
	Alaska	02	50 years	50	Hispanic or Latino	2135-2	White	2106-3	410
	Alaska	02	50 years	50	Not Hispanic or Latino	2186-5	American Indian or Alaska Native	1002-5	1103
	Alaska	02	50 years	50	Not Hispanic or Latino	2186-5	Asian or Pacific Islander	A-PI	763
	Alaska	02	50 years	50	Not Hispanic or Latino	2186-5	Black or African American	2054-5	312
	Alaska	02	50 years	50	Not Hispanic or Latino	2186-5	White	2106-3	5785
	Alaska	02	51 years	51	Hispanic or Latino	2135-2	American Indian or Alaska Native	1002-5	37
	Alaska	02	51 years	51	Hispanic or Latino	2135-2	Asian or Pacific Islander	A-PI	20
	Alaska	02	51 years	51	Hispanic or Latino	2135-2	Black or African American	2054-5	35
	Alaska	02	51 years	51	Hispanic or Latino	2135-2	White	2106-3	377
	Alaska	02	51 years	51	Not Hispanic or Latino	2186-5	American Indian or Alaska Native	1002-5	1127
	Alaska	02	51 years	51	Not Hispanic or Latino	2186-5	Asian or Pacific Islander	A-PI	791
	Alaska	02	51 years	51	Not Hispanic or Latino	2186-5	Black or African American	2054-5	306
	Alaska	02	51 years	51	Not Hispanic or Latino	2186-5	White	2106-3	5541
	Alaska	02	52 years	52	Hispanic or Latino	2135-2	American Indian or Alaska Native	1002-5	46
	Alaska	02	52 years	52	Hispanic or Latino	2135-2	Asian or Pacific Islander	A-PI	22
	Alaska	02	52 years	52	Hispanic or Latino	2135-2	Black or African American	2054-5	24
	Alaska	02	52 years	52	Hispanic or Latino	2135-2	White	2106-3	367
	Alaska	02	52 years	52	Not Hispanic or Latino	2186-5	American Indian or Alaska Native	1002-5	1238
	Alaska	02	52 years	52	Not Hispanic or Latino	2186-5	Asian or Pacific Islander	A-PI	747
	Alaska	02	52 years	52	Not Hispanic or Latino	2186-5	Black or African American	2054-5	275
	Alaska	02	52 years	52	Not Hispanic or Latino	2186-5	White	2106-3	5646
	Alaska	02	53 years	53	Hispanic or Latino	2135-2	American Indian or Alaska Native	1002-5	43
	Alaska	02	53 years	53	Hispanic or Latino	2135-2	Asian or Pacific Islander	A-PI	29
	Alaska	02	53 years	53	Hispanic or Latino	2135-2	Black or African American	2054-5	28
	Alaska	02	53 years	53	Hispanic or Latino	2135-2	White	2106-3	331
	Alaska	02	53 years	53	Not Hispanic or Latino	2186-5	American Indian or Alaska Native	1002-5	1315
	Alaska	02	53 years	53	Not Hispanic or Latino	2186-5	Asian or Pacific Islander	A-PI	726
	Alaska	02	53 years	53	Not Hispanic or Latino	2186-5	Black or African American	2054-5	282
	Alaska	02	53 years	53	Not Hispanic or Latino	2186-5	White	2106-3	5862
	Alaska	02	54 years	54	Hispanic or Latino	2135-2	American Indian or Alaska Native	1002-5	38
	Alaska	02	54 years	54	Hispanic or Latino	2135-2	Asian or Pacific Islander	A-PI	15
	Alaska	02	54 years	54	Hispanic or Latino	2135-2	Black or African American	2054-5	27
	Alaska	02	54 years	54	Hispanic or Latino	2135-2	White	2106-3	362
	Alaska	02	54 years	54	Not Hispanic or Latino	2186-5	American Indian or Alaska Native	1002-5	1382
	Alaska	02	54 years	54	Not Hispanic or Latino	2186-5	Asian or Pacific Islander	A-PI	780
	Alaska	02	54 years	54	Not Hispanic or Latino	2186-5	Black or African American	2054-5	272
	Alaska	02	54 years	54	Not Hispanic or Latino	2186-5	White	2106-3	6264
	Alaska	02	55 years	55	Hispanic or Latino	2135-2	American Indian or Alaska Native	1002-5	37
	Alaska	02	55 years	55	Hispanic or Latino	2135-2	Asian or Pacific Islander	A-PI	15
	Alaska	02	55 years	55	Hispanic or Latino	2135-2	Black or African American	2054-5	16
	Alaska	02	55 years	55	Hispanic or Latino	2135-2	White	2106-3	340
	Alaska	02	55 years	55	Not Hispanic or Latino	2186-5	American Indian or Alaska Native	1002-5	1352
	Alaska	02	55 years	55	Not Hispanic or Latino	2186-5	Asian or Pacific Islander	A-PI	818
	Alaska	02	55 years	55	Not Hispanic or Latino	2186-5	Black or African American	2054-5	315
	Alaska	02	55 years	55	Not Hispanic or Latino	2186-5	White	2106-3	6543
	Alaska	02	56 years	56	Hispanic or Latino	2135-2	American Indian or Alaska Native	1002-5	42
	Alaska	02	56 years	56	Hispanic or Latino	2135-2	Asian or Pacific Islander	A-PI	14
	Alaska	02	56 years	56	Hispanic or Latino	2135-2	Black or African American	2054-5	28
	Alaska	02	56 years	56	Hispanic or Latino	2135-2	White	2106-3	328
	Alaska	02	56 years	56	Not Hispanic or Latino	2186-5	American Indian or Alaska Native	1002-5	1376
	Alaska	02	56 years	56	Not Hispanic or Latino	2186-5	Asian or Pacific Islander	A-PI	746
	Alaska	02	56 years	56	Not Hispanic or Latino	2186-5	Black or African American	2054-5	295
	Alaska	02	56 years	56	Not Hispanic or Latino	2186-5	White	2106-3	6674
	Alaska	02	57 years	57	Hispanic or Latino	2135-2	American Indian or Alaska Native	1002-5	18
	Alaska	02	57 years	57	Hispanic or Latino	2135-2	Asian or Pacific Islander	A-PI	12
	Alaska	02	57 years	57	Hispanic or Latino	2135-2	Black or African American	2054-5	19
	Alaska	02	57 years	57	Hispanic or Latino	2135-2	White	2106-3	350
	Alaska	02	57 years	57	Not Hispanic or Latino	2186-5	American Indian or Alaska Native	1002-5	1313
	Alaska	02	57 years	57	Not Hispanic or Latino	2186-5	Asian or Pacific Islander	A-PI	791
	Alaska	02	57 years	57	Not Hispanic or Latino	2186-5	Black or African American	2054-5	324
	Alaska	02	57 years	57	Not Hispanic or Latino	2186-5	White	2106-3	6818
	Alaska	02	58 years	58	Hispanic or Latino	2135-2	American Indian or Alaska Native	1002-5	41
	Alaska	02	58 years	58	Hispanic or Latino	2135-2	Asian or Pacific Islander	A-PI	14
	Alaska	02	58 years	58	Hispanic or Latino	2135-2	Black or African American	2054-5	20
	Alaska	02	58 years	58	Hispanic or Latino	2135-2	White	2106-3	347
	Alaska	02	58 years	58	Not Hispanic or Latino	2186-5	American Indian or Alaska Native	1002-5	1294
	Alaska	02	58 years	58	Not Hispanic or Latino	2186-5	Asian or Pacific Islander	A-PI	713
	Alaska	02	58 years	58	Not Hispanic or Latino	2186-5	Black or African American	2054-5	301
	Alaska	02	58 years	58	Not Hispanic or Latino	2186-5	White	2106-3	7010
	Alaska	02	59 years	59	Hispanic or Latino	2135-2	American Indian or Alaska Native	1002-5	39
	Alaska	02	59 years	59	Hispanic or Latino	2135-2	Asian or Pacific Islander	A-PI	18
	Alaska	02	59 years	59	Hispanic or Latino	2135-2	Black or African American	2054-5	23
	Alaska	02	59 years	59	Hispanic or Latino	2135-2	White	2106-3	302
	Alaska	02	59 years	59	Not Hispanic or Latino	2186-5	American Indian or Alaska Native	1002-5	1312
	Alaska	02	59 years	59	Not Hispanic or Latino	2186-5	Asian or Pacific Islander	A-PI	742
	Alaska	02	59 years	59	Not Hispanic or Latino	2186-5	Black or African American	2054-5	304
	Alaska	02	59 years	59	Not Hispanic or Latino	2186-5	White	2106-3	7158
	Alaska	02	60 years	60	Hispanic or Latino	2135-2	American Indian or Alaska Native	1002-5	45
	Alaska	02	60 years	60	Hispanic or Latino	2135-2	Asian or Pacific Islander	A-PI	11
	Alaska	02	60 years	60	Hispanic or Latino	2135-2	Black or African American	2054-5	14
	Alaska	02	60 years	60	Hispanic or Latino	2135-2	White	2106-3	277
	Alaska	02	60 years	60	Not Hispanic or Latino	2186-5	American Indian or Alaska Native	1002-5	1212
	Alaska	02	60 years	60	Not Hispanic or Latino	2186-5	Asian or Pacific Islander	A-PI	737
	Alaska	02	60 years	60	Not Hispanic or Latino	2186-5	Black or African American	2054-5	281
	Alaska	02	60 years	60	Not Hispanic or Latino	2186-5	White	2106-3	6797
	Alaska	02	61 years	61	Hispanic or Latino	2135-2	American Indian or Alaska Native	1002-5	32
	Alaska	02	61 years	61	Hispanic or Latino	2135-2	Asian or Pacific Islander	A-PI	8
	Alaska	02	61 years	61	Hispanic or Latino	2135-2	Black or African American	2054-5	18
	Alaska	02	61 years	61	Hispanic or Latino	2135-2	White	2106-3	243
	Alaska	02	61 years	61	Not Hispanic or Latino	2186-5	American Indian or Alaska Native	1002-5	1201
	Alaska	02	61 years	61	Not Hispanic or Latino	2186-5	Asian or Pacific Islander	A-PI	683
	Alaska	02	61 years	61	Not Hispanic or Latino	2186-5	Black or African American	2054-5	242
	Alaska	02	61 years	61	Not Hispanic or Latino	2186-5	White	2106-3	6741
	Alaska	02	62 years	62	Hispanic or Latino	2135-2	American Indian or Alaska Native	1002-5	40
	Alaska	02	62 years	62	Hispanic or Latino	2135-2	Asian or Pacific Islander	A-PI	7
	Alaska	02	62 years	62	Hispanic or Latino	2135-2	Black or African American	2054-5	11
	Alaska	02	62 years	62	Hispanic or Latino	2135-2	White	2106-3	245
	Alaska	02	62 years	62	Not Hispanic or Latino	2186-5	American Indian or Alaska Native	1002-5	1097
	Alaska	02	62 years	62	Not Hispanic or Latino	2186-5	Asian or Pacific Islander	A-PI	670
	Alaska	02	62 years	62	Not Hispanic or Latino	2186-5	Black or African American	2054-5	264
	Alaska	02	62 years	62	Not Hispanic or Latino	2186-5	White	2106-3	6827
	Alaska	02	63 years	63	Hispanic or Latino	2135-2	American Indian or Alaska Native	1002-5	23
	Alaska	02	63 years	63	Hispanic or Latino	2135-2	Asian or Pacific Islander	A-PI	10
	Alaska	02	63 years	63	Hispanic or Latino	2135-2	Black or African American	2054-5	10
	Alaska	02	63 years	63	Hispanic or Latino	2135-2	White	2106-3	241
	Alaska	02	63 years	63	Not Hispanic or Latino	2186-5	American Indian or Alaska Native	1002-5	1006
	Alaska	02	63 years	63	Not Hispanic or Latino	2186-5	Asian or Pacific Islander	A-PI	605
	Alaska	02	63 years	63	Not Hispanic or Latino	2186-5	Black or African American	2054-5	253
	Alaska	02	63 years	63	Not Hispanic or Latino	2186-5	White	2106-3	6466
	Alaska	02	64 years	64	Hispanic or Latino	2135-2	American Indian or Alaska Native	1002-5	34
	Alaska	02	64 years	64	Hispanic or Latino	2135-2	Asian or Pacific Islander	A-PI	20
	Alaska	02	64 years	64	Hispanic or Latino	2135-2	Black or African American	2054-5	6
	Alaska	02	64 years	64	Hispanic or Latino	2135-2	White	2106-3	247
	Alaska	02	64 years	64	Not Hispanic or Latino	2186-5	American Indian or Alaska Native	1002-5	1077
	Alaska	02	64 years	64	Not Hispanic or Latino	2186-5	Asian or Pacific Islander	A-PI	568
	Alaska	02	64 years	64	Not Hispanic or Latino	2186-5	Black or African American	2054-5	256
	Alaska	02	64 years	64	Not Hispanic or Latino	2186-5	White	2106-3	6592
	Alaska	02	65 years	65	Hispanic or Latino	2135-2	American Indian or Alaska Native	1002-5	23
	Alaska	02	65 years	65	Hispanic or Latino	2135-2	Asian or Pacific Islander	A-PI	15
	Alaska	02	65 years	65	Hispanic or Latino	2135-2	Black or African American	2054-5	10
	Alaska	02	65 years	65	Hispanic or Latino	2135-2	White	2106-3	217
	Alaska	02	65 years	65	Not Hispanic or Latino	2186-5	American Indian or Alaska Native	1002-5	971
	Alaska	02	65 years	65	Not Hispanic or Latino	2186-5	Asian or Pacific Islander	A-PI	567
	Alaska	02	65 years	65	Not Hispanic or Latino	2186-5	Black or African American	2054-5	238
	Alaska	02	65 years	65	Not Hispanic or Latino	2186-5	White	2106-3	6169
	Alaska	02	66 years	66	Hispanic or Latino	2135-2	American Indian or Alaska Native	1002-5	13
	Alaska	02	66 years	66	Hispanic or Latino	2135-2	Asian or Pacific Islander	A-PI	13
	Alaska	02	66 years	66	Hispanic or Latino	2135-2	Black or African American	2054-5	11
	Alaska	02	66 years	66	Hispanic or Latino	2135-2	White	2106-3	190
	Alaska	02	66 years	66	Not Hispanic or Latino	2186-5	American Indian or Alaska Native	1002-5	940
	Alaska	02	66 years	66	Not Hispanic or Latino	2186-5	Asian or Pacific Islander	A-PI	500
	Alaska	02	66 years	66	Not Hispanic or Latino	2186-5	Black or African American	2054-5	226
	Alaska	02	66 years	66	Not Hispanic or Latino	2186-5	White	2106-3	5841
	Alaska	02	67 years	67	Hispanic or Latino	2135-2	American Indian or Alaska Native	1002-5	18
	Alaska	02	67 years	67	Hispanic or Latino	2135-2	Asian or Pacific Islander	A-PI	3
	Alaska	02	67 years	67	Hispanic or Latino	2135-2	Black or African American	2054-5	9
	Alaska	02	67 years	67	Hispanic or Latino	2135-2	White	2106-3	172
	Alaska	02	67 years	67	Not Hispanic or Latino	2186-5	American Indian or Alaska Native	1002-5	841
	Alaska	02	67 years	67	Not Hispanic or Latino	2186-5	Asian or Pacific Islander	A-PI	448
	Alaska	02	67 years	67	Not Hispanic or Latino	2186-5	Black or African American	2054-5	172
	Alaska	02	67 years	67	Not Hispanic or Latino	2186-5	White	2106-3	5557
	Alaska	02	68 years	68	Hispanic or Latino	2135-2	American Indian or Alaska Native	1002-5	21
	Alaska	02	68 years	68	Hispanic or Latino	2135-2	Asian or Pacific Islander	A-PI	9
	Alaska	02	68 years	68	Hispanic or Latino	2135-2	Black or African American	2054-5	11
	Alaska	02	68 years	68	Hispanic or Latino	2135-2	White	2106-3	151
	Alaska	02	68 years	68	Not Hispanic or Latino	2186-5	American Indian or Alaska Native	1002-5	820
	Alaska	02	68 years	68	Not Hispanic or Latino	2186-5	Asian or Pacific Islander	A-PI	441
	Alaska	02	68 years	68	Not Hispanic or Latino	2186-5	Black or African American	2054-5	190
	Alaska	02	68 years	68	Not Hispanic or Latino	2186-5	White	2106-3	5012
	Alaska	02	69 years	69	Hispanic or Latino	2135-2	American Indian or Alaska Native	1002-5	20
	Alaska	02	69 years	69	Hispanic or Latino	2135-2	Asian or Pacific Islander	A-PI	5
	Alaska	02	69 years	69	Hispanic or Latino	2135-2	Black or African American	2054-5	6
	Alaska	02	69 years	69	Hispanic or Latino	2135-2	White	2106-3	136
	Alaska	02	69 years	69	Not Hispanic or Latino	2186-5	American Indian or Alaska Native	1002-5	818
	Alaska	02	69 years	69	Not Hispanic or Latino	2186-5	Asian or Pacific Islander	A-PI	452
	Alaska	02	69 years	69	Not Hispanic or Latino	2186-5	Black or African American	2054-5	149
	Alaska	02	69 years	69	Not Hispanic or Latino	2186-5	White	2106-3	4856
	Alaska	02	70 years	70	Hispanic or Latino	2135-2	American Indian or Alaska Native	1002-5	6
	Alaska	02	70 years	70	Hispanic or Latino	2135-2	Asian or Pacific Islander	A-PI	7
	Alaska	02	70 years	70	Hispanic or Latino	2135-2	Black or African American	2054-5	8
	Alaska	02	70 years	70	Hispanic or Latino	2135-2	White	2106-3	142
	Alaska	02	70 years	70	Not Hispanic or Latino	2186-5	American Indian or Alaska Native	1002-5	736
	Alaska	02	70 years	70	Not Hispanic or Latino	2186-5	Asian or Pacific Islander	A-PI	422
	Alaska	02	70 years	70	Not Hispanic or Latino	2186-5	Black or African American	2054-5	126
	Alaska	02	70 years	70	Not Hispanic or Latino	2186-5	White	2106-3	4531
	Alaska	02	71 years	71	Hispanic or Latino	2135-2	American Indian or Alaska Native	1002-5	7
	Alaska	02	71 years	71	Hispanic or Latino	2135-2	Asian or Pacific Islander	A-PI	12
	Alaska	02	71 years	71	Hispanic or Latino	2135-2	Black or African American	2054-5	5
	Alaska	02	71 years	71	Hispanic or Latino	2135-2	White	2106-3	132
	Alaska	02	71 years	71	Not Hispanic or Latino	2186-5	American Indian or Alaska Native	1002-5	663
	Alaska	02	71 years	71	Not Hispanic or Latino	2186-5	Asian or Pacific Islander	A-PI	359
	Alaska	02	71 years	71	Not Hispanic or Latino	2186-5	Black or African American	2054-5	110
	Alaska	02	71 years	71	Not Hispanic or Latino	2186-5	White	2106-3	4333
	Alaska	02	72 years	72	Hispanic or Latino	2135-2	American Indian or Alaska Native	1002-5	11
	Alaska	02	72 years	72	Hispanic or Latino	2135-2	Asian or Pacific Islander	A-PI	8
	Alaska	02	72 years	72	Hispanic or Latino	2135-2	Black or African American	2054-5	7
	Alaska	02	72 years	72	Hispanic or Latino	2135-2	White	2106-3	122
	Alaska	02	72 years	72	Not Hispanic or Latino	2186-5	American Indian or Alaska Native	1002-5	603
	Alaska	02	72 years	72	Not Hispanic or Latino	2186-5	Asian or Pacific Islander	A-PI	329
	Alaska	02	72 years	72	Not Hispanic or Latino	2186-5	Black or African American	2054-5	94
	Alaska	02	72 years	72	Not Hispanic or Latino	2186-5	White	2106-3	4308
	Alaska	02	73 years	73	Hispanic or Latino	2135-2	American Indian or Alaska Native	1002-5	8
	Alaska	02	73 years	73	Hispanic or Latino	2135-2	Asian or Pacific Islander	A-PI	3
	Alaska	02	73 years	73	Hispanic or Latino	2135-2	Black or African American	2054-5	5
	Alaska	02	73 years	73	Hispanic or Latino	2135-2	White	2106-3	96
	Alaska	02	73 years	73	Not Hispanic or Latino	2186-5	American Indian or Alaska Native	1002-5	481
	Alaska	02	73 years	73	Not Hispanic or Latino	2186-5	Asian or Pacific Islander	A-PI	266
	Alaska	02	73 years	73	Not Hispanic or Latino	2186-5	Black or African American	2054-5	85
	Alaska	02	73 years	73	Not Hispanic or Latino	2186-5	White	2106-3	3069
	Alaska	02	74 years	74	Hispanic or Latino	2135-2	American Indian or Alaska Native	1002-5	13
	Alaska	02	74 years	74	Hispanic or Latino	2135-2	Asian or Pacific Islander	A-PI	3
	Alaska	02	74 years	74	Hispanic or Latino	2135-2	Black or African American	2054-5	2
	Alaska	02	74 years	74	Hispanic or Latino	2135-2	White	2106-3	87
	Alaska	02	74 years	74	Not Hispanic or Latino	2186-5	American Indian or Alaska Native	1002-5	529
	Alaska	02	74 years	74	Not Hispanic or Latino	2186-5	Asian or Pacific Islander	A-PI	256
	Alaska	02	74 years	74	Not Hispanic or Latino	2186-5	Black or African American	2054-5	98
	Alaska	02	74 years	74	Not Hispanic or Latino	2186-5	White	2106-3	2957
	Alaska	02	75 years	75	Hispanic or Latino	2135-2	American Indian or Alaska Native	1002-5	8
	Alaska	02	75 years	75	Hispanic or Latino	2135-2	Asian or Pacific Islander	A-PI	3
	Alaska	02	75 years	75	Hispanic or Latino	2135-2	Black or African American	2054-5	2
	Alaska	02	75 years	75	Hispanic or Latino	2135-2	White	2106-3	60
	Alaska	02	75 years	75	Not Hispanic or Latino	2186-5	American Indian or Alaska Native	1002-5	462
	Alaska	02	75 years	75	Not Hispanic or Latino	2186-5	Asian or Pacific Islander	A-PI	236
	Alaska	02	75 years	75	Not Hispanic or Latino	2186-5	Black or African American	2054-5	62
	Alaska	02	75 years	75	Not Hispanic or Latino	2186-5	White	2106-3	2832
	Alaska	02	76 years	76	Hispanic or Latino	2135-2	American Indian or Alaska Native	1002-5	8
	Alaska	02	76 years	76	Hispanic or Latino	2135-2	Asian or Pacific Islander	A-PI	4
	Alaska	02	76 years	76	Hispanic or Latino	2135-2	Black or African American	2054-5	7
	Alaska	02	76 years	76	Hispanic or Latino	2135-2	White	2106-3	59
	Alaska	02	76 years	76	Not Hispanic or Latino	2186-5	American Indian or Alaska Native	1002-5	380
	Alaska	02	76 years	76	Not Hispanic or Latino	2186-5	Asian or Pacific Islander	A-PI	199
	Alaska	02	76 years	76	Not Hispanic or Latino	2186-5	Black or African American	2054-5	61
	Alaska	02	76 years	76	Not Hispanic or Latino	2186-5	White	2106-3	2741
	Alaska	02	77 years	77	Hispanic or Latino	2135-2	American Indian or Alaska Native	1002-5	7
	Alaska	02	77 years	77	Hispanic or Latino	2135-2	Asian or Pacific Islander	A-PI	2
	Alaska	02	77 years	77	Hispanic or Latino	2135-2	Black or African American	2054-5	4
	Alaska	02	77 years	77	Hispanic or Latino	2135-2	White	2106-3	58
	Alaska	02	77 years	77	Not Hispanic or Latino	2186-5	American Indian or Alaska Native	1002-5	359
	Alaska	02	77 years	77	Not Hispanic or Latino	2186-5	Asian or Pacific Islander	A-PI	187
	Alaska	02	77 years	77	Not Hispanic or Latino	2186-5	Black or African American	2054-5	56
	Alaska	02	77 years	77	Not Hispanic or Latino	2186-5	White	2106-3	2277
	Alaska	02	78 years	78	Hispanic or Latino	2135-2	American Indian or Alaska Native	1002-5	8
	Alaska	02	78 years	78	Hispanic or Latino	2135-2	Asian or Pacific Islander	A-PI	5
	Alaska	02	78 years	78	Hispanic or Latino	2135-2	Black or African American	2054-5	3
	Alaska	02	78 years	78	Hispanic or Latino	2135-2	White	2106-3	57
	Alaska	02	78 years	78	Not Hispanic or Latino	2186-5	American Indian or Alaska Native	1002-5	373
	Alaska	02	78 years	78	Not Hispanic or Latino	2186-5	Asian or Pacific Islander	A-PI	165
	Alaska	02	78 years	78	Not Hispanic or Latino	2186-5	Black or African American	2054-5	50
	Alaska	02	78 years	78	Not Hispanic or Latino	2186-5	White	2106-3	2016
	Alaska	02	79 years	79	Hispanic or Latino	2135-2	American Indian or Alaska Native	1002-5	6
	Alaska	02	79 years	79	Hispanic or Latino	2135-2	Asian or Pacific Islander	A-PI	2
	Alaska	02	79 years	79	Hispanic or Latino	2135-2	Black or African American	2054-5	3
	Alaska	02	79 years	79	Hispanic or Latino	2135-2	White	2106-3	58
	Alaska	02	79 years	79	Not Hispanic or Latino	2186-5	American Indian or Alaska Native	1002-5	318
	Alaska	02	79 years	79	Not Hispanic or Latino	2186-5	Asian or Pacific Islander	A-PI	146
	Alaska	02	79 years	79	Not Hispanic or Latino	2186-5	Black or African American	2054-5	42
	Alaska	02	79 years	79	Not Hispanic or Latino	2186-5	White	2106-3	1752
	Alaska	02	80 years	80	Hispanic or Latino	2135-2	American Indian or Alaska Native	1002-5	4
	Alaska	02	80 years	80	Hispanic or Latino	2135-2	Asian or Pacific Islander	A-PI	3
	Alaska	02	80 years	80	Hispanic or Latino	2135-2	Black or African American	2054-5	4
	Alaska	02	80 years	80	Hispanic or Latino	2135-2	White	2106-3	45
	Alaska	02	80 years	80	Not Hispanic or Latino	2186-5	American Indian or Alaska Native	1002-5	256
	Alaska	02	80 years	80	Not Hispanic or Latino	2186-5	Asian or Pacific Islander	A-PI	134
	Alaska	02	80 years	80	Not Hispanic or Latino	2186-5	Black or African American	2054-5	43
	Alaska	02	80 years	80	Not Hispanic or Latino	2186-5	White	2106-3	1482
	Alaska	02	81 years	81	Hispanic or Latino	2135-2	American Indian or Alaska Native	1002-5	4
	Alaska	02	81 years	81	Hispanic or Latino	2135-2	Asian or Pacific Islander	A-PI	2
	Alaska	02	81 years	81	Hispanic or Latino	2135-2	Black or African American	2054-5	1
	Alaska	02	81 years	81	Hispanic or Latino	2135-2	White	2106-3	37
	Alaska	02	81 years	81	Not Hispanic or Latino	2186-5	American Indian or Alaska Native	1002-5	241
	Alaska	02	81 years	81	Not Hispanic or Latino	2186-5	Asian or Pacific Islander	A-PI	137
	Alaska	02	81 years	81	Not Hispanic or Latino	2186-5	Black or African American	2054-5	37
	Alaska	02	81 years	81	Not Hispanic or Latino	2186-5	White	2106-3	1325
	Alaska	02	82 years	82	Hispanic or Latino	2135-2	American Indian or Alaska Native	1002-5	4
	Alaska	02	82 years	82	Hispanic or Latino	2135-2	Asian or Pacific Islander	A-PI	2
	Alaska	02	82 years	82	Hispanic or Latino	2135-2	Black or African American	2054-5	4
	Alaska	02	82 years	82	Hispanic or Latino	2135-2	White	2106-3	31
	Alaska	02	82 years	82	Not Hispanic or Latino	2186-5	American Indian or Alaska Native	1002-5	221
	Alaska	02	82 years	82	Not Hispanic or Latino	2186-5	Asian or Pacific Islander	A-PI	120
	Alaska	02	82 years	82	Not Hispanic or Latino	2186-5	Black or African American	2054-5	31
	Alaska	02	82 years	82	Not Hispanic or Latino	2186-5	White	2106-3	1173
	Alaska	02	83 years	83	Hispanic or Latino	2135-2	Asian or Pacific Islander	A-PI	1
	Alaska	02	83 years	83	Hispanic or Latino	2135-2	Black or African American	2054-5	5
	Alaska	02	83 years	83	Hispanic or Latino	2135-2	White	2106-3	28
	Alaska	02	83 years	83	Not Hispanic or Latino	2186-5	American Indian or Alaska Native	1002-5	200
	Alaska	02	83 years	83	Not Hispanic or Latino	2186-5	Asian or Pacific Islander	A-PI	99
	Alaska	02	83 years	83	Not Hispanic or Latino	2186-5	Black or African American	2054-5	45
	Alaska	02	83 years	83	Not Hispanic or Latino	2186-5	White	2106-3	1033
	Alaska	02	84 years	84	Hispanic or Latino	2135-2	Asian or Pacific Islander	A-PI	1
	Alaska	02	84 years	84	Hispanic or Latino	2135-2	Black or African American	2054-5	4
	Alaska	02	84 years	84	Hispanic or Latino	2135-2	White	2106-3	39
	Alaska	02	84 years	84	Not Hispanic or Latino	2186-5	American Indian or Alaska Native	1002-5	172
	Alaska	02	84 years	84	Not Hispanic or Latino	2186-5	Asian or Pacific Islander	A-PI	88
	Alaska	02	84 years	84	Not Hispanic or Latino	2186-5	Black or African American	2054-5	32
	Alaska	02	84 years	84	Not Hispanic or Latino	2186-5	White	2106-3	941
	Alaska	02	85+ years	85+	Hispanic or Latino	2135-2	American Indian or Alaska Native	1002-5	6
	Alaska	02	85+ years	85+	Hispanic or Latino	2135-2	Asian or Pacific Islander	A-PI	13
	Alaska	02	85+ years	85+	Hispanic or Latino	2135-2	Black or African American	2054-5	16
	Alaska	02	85+ years	85+	Hispanic or Latino	2135-2	White	2106-3	175
	Alaska	02	85+ years	85+	Not Hispanic or Latino	2186-5	American Indian or Alaska Native	1002-5	858
	Alaska	02	85+ years	85+	Not Hispanic or Latino	2186-5	Asian or Pacific Islander	A-PI	593
	Alaska	02	85+ years	85+	Not Hispanic or Latino	2186-5	Black or African American	2054-5	149
	Alaska	02	85+ years	85+	Not Hispanic or Latino	2186-5	White	2106-3	5371
	Arizona	04	< 1 year	0	Hispanic or Latino	2135-2	American Indian or Alaska Native	1002-5	1935
	Arizona	04	< 1 year	0	Hispanic or Latino	2135-2	Asian or Pacific Islander	A-PI	627
	Arizona	04	< 1 year	0	Hispanic or Latino	2135-2	Black or African American	2054-5	1236
	Arizona	04	< 1 year	0	Hispanic or Latino	2135-2	White	2106-3	33464
	Arizona	04	< 1 year	0	Not Hispanic or Latino	2186-5	American Indian or Alaska Native	1002-5	4124
	Arizona	04	< 1 year	0	Not Hispanic or Latino	2186-5	Asian or Pacific Islander	A-PI	2854
	Arizona	04	< 1 year	0	Not Hispanic or Latino	2186-5	Black or African American	2054-5	4887
	Arizona	04	< 1 year	0	Not Hispanic or Latino	2186-5	White	2106-3	32802
	Arizona	04	1 year	1	Hispanic or Latino	2135-2	American Indian or Alaska Native	1002-5	2185
	Arizona	04	1 year	1	Hispanic or Latino	2135-2	Asian or Pacific Islander	A-PI	465
	Arizona	04	1 year	1	Hispanic or Latino	2135-2	Black or African American	2054-5	1032
	Arizona	04	1 year	1	Hispanic or Latino	2135-2	White	2106-3	34416
	Arizona	04	1 year	1	Not Hispanic or Latino	2186-5	American Indian or Alaska Native	1002-5	4125
	Arizona	04	1 year	1	Not Hispanic or Latino	2186-5	Asian or Pacific Islander	A-PI	2824
	Arizona	04	1 year	1	Not Hispanic or Latino	2186-5	Black or African American	2054-5	5025
	Arizona	04	1 year	1	Not Hispanic or Latino	2186-5	White	2106-3	32993
	Arizona	04	2 years	2	Hispanic or Latino	2135-2	American Indian or Alaska Native	1002-5	3102
	Arizona	04	2 years	2	Hispanic or Latino	2135-2	Asian or Pacific Islander	A-PI	387
	Arizona	04	2 years	2	Hispanic or Latino	2135-2	Black or African American	2054-5	1074
	Arizona	04	2 years	2	Hispanic or Latino	2135-2	White	2106-3	34760
	Arizona	04	2 years	2	Not Hispanic or Latino	2186-5	American Indian or Alaska Native	1002-5	4321
	Arizona	04	2 years	2	Not Hispanic or Latino	2186-5	Asian or Pacific Islander	A-PI	2675
	Arizona	04	2 years	2	Not Hispanic or Latino	2186-5	Black or African American	2054-5	5424
	Arizona	04	2 years	2	Not Hispanic or Latino	2186-5	White	2106-3	33983
	Arizona	04	3 years	3	Hispanic or Latino	2135-2	American Indian or Alaska Native	1002-5	3160
	Arizona	04	3 years	3	Hispanic or Latino	2135-2	Asian or Pacific Islander	A-PI	505
	Arizona	04	3 years	3	Hispanic or Latino	2135-2	Black or African American	2054-5	1186
	Arizona	04	3 years	3	Hispanic or Latino	2135-2	White	2106-3	35601
	Arizona	04	3 years	3	Not Hispanic or Latino	2186-5	American Indian or Alaska Native	1002-5	4374
	Arizona	04	3 years	3	Not Hispanic or Latino	2186-5	Asian or Pacific Islander	A-PI	2881
	Arizona	04	3 years	3	Not Hispanic or Latino	2186-5	Black or African American	2054-5	5529
	Arizona	04	3 years	3	Not Hispanic or Latino	2186-5	White	2106-3	34956
	Arizona	04	4 years	4	Hispanic or Latino	2135-2	American Indian or Alaska Native	1002-5	3045
	Arizona	04	4 years	4	Hispanic or Latino	2135-2	Asian or Pacific Islander	A-PI	504
	Arizona	04	4 years	4	Hispanic or Latino	2135-2	Black or African American	2054-5	1229
	Arizona	04	4 years	4	Hispanic or Latino	2135-2	White	2106-3	36350
	Arizona	04	4 years	4	Not Hispanic or Latino	2186-5	American Indian or Alaska Native	1002-5	4537
	Arizona	04	4 years	4	Not Hispanic or Latino	2186-5	Asian or Pacific Islander	A-PI	3042
	Arizona	04	4 years	4	Not Hispanic or Latino	2186-5	Black or African American	2054-5	5894
	Arizona	04	4 years	4	Not Hispanic or Latino	2186-5	White	2106-3	36275
	Arizona	04	5 years	5	Hispanic or Latino	2135-2	American Indian or Alaska Native	1002-5	2928
	Arizona	04	5 years	5	Hispanic or Latino	2135-2	Asian or Pacific Islander	A-PI	500
	Arizona	04	5 years	5	Hispanic or Latino	2135-2	Black or African American	2054-5	1222
	Arizona	04	5 years	5	Hispanic or Latino	2135-2	White	2106-3	35421
	Arizona	04	5 years	5	Not Hispanic or Latino	2186-5	American Indian or Alaska Native	1002-5	4860
	Arizona	04	5 years	5	Not Hispanic or Latino	2186-5	Asian or Pacific Islander	A-PI	3093
	Arizona	04	5 years	5	Not Hispanic or Latino	2186-5	Black or African American	2054-5	5968
	Arizona	04	5 years	5	Not Hispanic or Latino	2186-5	White	2106-3	36866
	Arizona	04	6 years	6	Hispanic or Latino	2135-2	American Indian or Alaska Native	1002-5	2439
	Arizona	04	6 years	6	Hispanic or Latino	2135-2	Asian or Pacific Islander	A-PI	522
	Arizona	04	6 years	6	Hispanic or Latino	2135-2	Black or African American	2054-5	1233
	Arizona	04	6 years	6	Hispanic or Latino	2135-2	White	2106-3	35195
	Arizona	04	6 years	6	Not Hispanic or Latino	2186-5	American Indian or Alaska Native	1002-5	5114
	Arizona	04	6 years	6	Not Hispanic or Latino	2186-5	Asian or Pacific Islander	A-PI	3301
	Arizona	04	6 years	6	Not Hispanic or Latino	2186-5	Black or African American	2054-5	5901
	Arizona	04	6 years	6	Not Hispanic or Latino	2186-5	White	2106-3	36700
	Arizona	04	7 years	7	Hispanic or Latino	2135-2	American Indian or Alaska Native	1002-5	2481
	Arizona	04	7 years	7	Hispanic or Latino	2135-2	Asian or Pacific Islander	A-PI	593
	Arizona	04	7 years	7	Hispanic or Latino	2135-2	Black or African American	2054-5	1147
	Arizona	04	7 years	7	Hispanic or Latino	2135-2	White	2106-3	34851
	Arizona	04	7 years	7	Not Hispanic or Latino	2186-5	American Indian or Alaska Native	1002-5	5163
	Arizona	04	7 years	7	Not Hispanic or Latino	2186-5	Asian or Pacific Islander	A-PI	3240
	Arizona	04	7 years	7	Not Hispanic or Latino	2186-5	Black or African American	2054-5	5836
	Arizona	04	7 years	7	Not Hispanic or Latino	2186-5	White	2106-3	37008
	Arizona	04	8 years	8	Hispanic or Latino	2135-2	American Indian or Alaska Native	1002-5	2463
	Arizona	04	8 years	8	Hispanic or Latino	2135-2	Asian or Pacific Islander	A-PI	566
	Arizona	04	8 years	8	Hispanic or Latino	2135-2	Black or African American	2054-5	1147
	Arizona	04	8 years	8	Hispanic or Latino	2135-2	White	2106-3	35516
	Arizona	04	8 years	8	Not Hispanic or Latino	2186-5	American Indian or Alaska Native	1002-5	5184
	Arizona	04	8 years	8	Not Hispanic or Latino	2186-5	Asian or Pacific Islander	A-PI	3147
	Arizona	04	8 years	8	Not Hispanic or Latino	2186-5	Black or African American	2054-5	5855
	Arizona	04	8 years	8	Not Hispanic or Latino	2186-5	White	2106-3	37435
	Arizona	04	9 years	9	Hispanic or Latino	2135-2	American Indian or Alaska Native	1002-5	2249
	Arizona	04	9 years	9	Hispanic or Latino	2135-2	Asian or Pacific Islander	A-PI	642
	Arizona	04	9 years	9	Hispanic or Latino	2135-2	Black or African American	2054-5	1510
	Arizona	04	9 years	9	Hispanic or Latino	2135-2	White	2106-3	36362
	Arizona	04	9 years	9	Not Hispanic or Latino	2186-5	American Indian or Alaska Native	1002-5	4878
	Arizona	04	9 years	9	Not Hispanic or Latino	2186-5	Asian or Pacific Islander	A-PI	3360
	Arizona	04	9 years	9	Not Hispanic or Latino	2186-5	Black or African American	2054-5	5731
	Arizona	04	9 years	9	Not Hispanic or Latino	2186-5	White	2106-3	36065
	Arizona	04	10 years	10	Hispanic or Latino	2135-2	American Indian or Alaska Native	1002-5	2256
	Arizona	04	10 years	10	Hispanic or Latino	2135-2	Asian or Pacific Islander	A-PI	684
	Arizona	04	10 years	10	Hispanic or Latino	2135-2	Black or African American	2054-5	1591
	Arizona	04	10 years	10	Hispanic or Latino	2135-2	White	2106-3	36648
	Arizona	04	10 years	10	Not Hispanic or Latino	2186-5	American Indian or Alaska Native	1002-5	4854
	Arizona	04	10 years	10	Not Hispanic or Latino	2186-5	Asian or Pacific Islander	A-PI	3381
	Arizona	04	10 years	10	Not Hispanic or Latino	2186-5	Black or African American	2054-5	5793
	Arizona	04	10 years	10	Not Hispanic or Latino	2186-5	White	2106-3	37365
	Arizona	04	11 years	11	Hispanic or Latino	2135-2	American Indian or Alaska Native	1002-5	2357
	Arizona	04	11 years	11	Hispanic or Latino	2135-2	Asian or Pacific Islander	A-PI	682
	Arizona	04	11 years	11	Hispanic or Latino	2135-2	Black or African American	2054-5	1649
	Arizona	04	11 years	11	Hispanic or Latino	2135-2	White	2106-3	38762
	Arizona	04	11 years	11	Not Hispanic or Latino	2186-5	American Indian or Alaska Native	1002-5	5017
	Arizona	04	11 years	11	Not Hispanic or Latino	2186-5	Asian or Pacific Islander	A-PI	3485
	Arizona	04	11 years	11	Not Hispanic or Latino	2186-5	Black or African American	2054-5	5986
	Arizona	04	11 years	11	Not Hispanic or Latino	2186-5	White	2106-3	38667
	Arizona	04	12 years	12	Hispanic or Latino	2135-2	American Indian or Alaska Native	1002-5	2267
	Arizona	04	12 years	12	Hispanic or Latino	2135-2	Asian or Pacific Islander	A-PI	709
	Arizona	04	12 years	12	Hispanic or Latino	2135-2	Black or African American	2054-5	1542
	Arizona	04	12 years	12	Hispanic or Latino	2135-2	White	2106-3	38417
	Arizona	04	12 years	12	Not Hispanic or Latino	2186-5	American Indian or Alaska Native	1002-5	5005
	Arizona	04	12 years	12	Not Hispanic or Latino	2186-5	Asian or Pacific Islander	A-PI	3273
	Arizona	04	12 years	12	Not Hispanic or Latino	2186-5	Black or African American	2054-5	5912
	Arizona	04	12 years	12	Not Hispanic or Latino	2186-5	White	2106-3	39826
	Arizona	04	13 years	13	Hispanic or Latino	2135-2	American Indian or Alaska Native	1002-5	2200
	Arizona	04	13 years	13	Hispanic or Latino	2135-2	Asian or Pacific Islander	A-PI	683
	Arizona	04	13 years	13	Hispanic or Latino	2135-2	Black or African American	2054-5	1472
	Arizona	04	13 years	13	Hispanic or Latino	2135-2	White	2106-3	38124
	Arizona	04	13 years	13	Not Hispanic or Latino	2186-5	American Indian or Alaska Native	1002-5	4958
	Arizona	04	13 years	13	Not Hispanic or Latino	2186-5	Asian or Pacific Islander	A-PI	3346
	Arizona	04	13 years	13	Not Hispanic or Latino	2186-5	Black or African American	2054-5	5759
	Arizona	04	13 years	13	Not Hispanic or Latino	2186-5	White	2106-3	39307
	Arizona	04	14 years	14	Hispanic or Latino	2135-2	American Indian or Alaska Native	1002-5	2261
	Arizona	04	14 years	14	Hispanic or Latino	2135-2	Asian or Pacific Islander	A-PI	670
	Arizona	04	14 years	14	Hispanic or Latino	2135-2	Black or African American	2054-5	1399
	Arizona	04	14 years	14	Hispanic or Latino	2135-2	White	2106-3	37729
	Arizona	04	14 years	14	Not Hispanic or Latino	2186-5	American Indian or Alaska Native	1002-5	5002
	Arizona	04	14 years	14	Not Hispanic or Latino	2186-5	Asian or Pacific Islander	A-PI	3459
	Arizona	04	14 years	14	Not Hispanic or Latino	2186-5	Black or African American	2054-5	5458
	Arizona	04	14 years	14	Not Hispanic or Latino	2186-5	White	2106-3	39098
	Arizona	04	15 years	15	Hispanic or Latino	2135-2	American Indian or Alaska Native	1002-5	2178
	Arizona	04	15 years	15	Hispanic or Latino	2135-2	Asian or Pacific Islander	A-PI	588
	Arizona	04	15 years	15	Hispanic or Latino	2135-2	Black or African American	2054-5	1399
	Arizona	04	15 years	15	Hispanic or Latino	2135-2	White	2106-3	37198
	Arizona	04	15 years	15	Not Hispanic or Latino	2186-5	American Indian or Alaska Native	1002-5	4793
	Arizona	04	15 years	15	Not Hispanic or Latino	2186-5	Asian or Pacific Islander	A-PI	3432
	Arizona	04	15 years	15	Not Hispanic or Latino	2186-5	Black or African American	2054-5	5460
	Arizona	04	15 years	15	Not Hispanic or Latino	2186-5	White	2106-3	39694
	Arizona	04	16 years	16	Hispanic or Latino	2135-2	American Indian or Alaska Native	1002-5	2069
	Arizona	04	16 years	16	Hispanic or Latino	2135-2	Asian or Pacific Islander	A-PI	622
	Arizona	04	16 years	16	Hispanic or Latino	2135-2	Black or African American	2054-5	1238
	Arizona	04	16 years	16	Hispanic or Latino	2135-2	White	2106-3	36556
	Arizona	04	16 years	16	Not Hispanic or Latino	2186-5	American Indian or Alaska Native	1002-5	4456
	Arizona	04	16 years	16	Not Hispanic or Latino	2186-5	Asian or Pacific Islander	A-PI	3393
	Arizona	04	16 years	16	Not Hispanic or Latino	2186-5	Black or African American	2054-5	5230
	Arizona	04	16 years	16	Not Hispanic or Latino	2186-5	White	2106-3	38268
	Arizona	04	17 years	17	Hispanic or Latino	2135-2	American Indian or Alaska Native	1002-5	1942
	Arizona	04	17 years	17	Hispanic or Latino	2135-2	Asian or Pacific Islander	A-PI	577
	Arizona	04	17 years	17	Hispanic or Latino	2135-2	Black or African American	2054-5	1232
	Arizona	04	17 years	17	Hispanic or Latino	2135-2	White	2106-3	36461
	Arizona	04	17 years	17	Not Hispanic or Latino	2186-5	American Indian or Alaska Native	1002-5	4482
	Arizona	04	17 years	17	Not Hispanic or Latino	2186-5	Asian or Pacific Islander	A-PI	3339
	Arizona	04	17 years	17	Not Hispanic or Latino	2186-5	Black or African American	2054-5	5478
	Arizona	04	17 years	17	Not Hispanic or Latino	2186-5	White	2106-3	39618
	Arizona	04	18 years	18	Hispanic or Latino	2135-2	American Indian or Alaska Native	1002-5	2052
	Arizona	04	18 years	18	Hispanic or Latino	2135-2	Asian or Pacific Islander	A-PI	605
	Arizona	04	18 years	18	Hispanic or Latino	2135-2	Black or African American	2054-5	1286
	Arizona	04	18 years	18	Hispanic or Latino	2135-2	White	2106-3	37907
	Arizona	04	18 years	18	Not Hispanic or Latino	2186-5	American Indian or Alaska Native	1002-5	4760
	Arizona	04	18 years	18	Not Hispanic or Latino	2186-5	Asian or Pacific Islander	A-PI	3828
	Arizona	04	18 years	18	Not Hispanic or Latino	2186-5	Black or African American	2054-5	5787
	Arizona	04	18 years	18	Not Hispanic or Latino	2186-5	White	2106-3	41975
	Arizona	04	19 years	19	Hispanic or Latino	2135-2	American Indian or Alaska Native	1002-5	2118
	Arizona	04	19 years	19	Hispanic or Latino	2135-2	Asian or Pacific Islander	A-PI	611
	Arizona	04	19 years	19	Hispanic or Latino	2135-2	Black or African American	2054-5	1256
	Arizona	04	19 years	19	Hispanic or Latino	2135-2	White	2106-3	38832
	Arizona	04	19 years	19	Not Hispanic or Latino	2186-5	American Indian or Alaska Native	1002-5	4759
	Arizona	04	19 years	19	Not Hispanic or Latino	2186-5	Asian or Pacific Islander	A-PI	3899
	Arizona	04	19 years	19	Not Hispanic or Latino	2186-5	Black or African American	2054-5	6065
	Arizona	04	19 years	19	Not Hispanic or Latino	2186-5	White	2106-3	42622
	Arizona	04	20 years	20	Hispanic or Latino	2135-2	American Indian or Alaska Native	1002-5	1977
	Arizona	04	20 years	20	Hispanic or Latino	2135-2	Asian or Pacific Islander	A-PI	627
	Arizona	04	20 years	20	Hispanic or Latino	2135-2	Black or African American	2054-5	1185
	Arizona	04	20 years	20	Hispanic or Latino	2135-2	White	2106-3	37539
	Arizona	04	20 years	20	Not Hispanic or Latino	2186-5	American Indian or Alaska Native	1002-5	4761
	Arizona	04	20 years	20	Not Hispanic or Latino	2186-5	Asian or Pacific Islander	A-PI	3949
	Arizona	04	20 years	20	Not Hispanic or Latino	2186-5	Black or African American	2054-5	5902
	Arizona	04	20 years	20	Not Hispanic or Latino	2186-5	White	2106-3	40949
	Arizona	04	21 years	21	Hispanic or Latino	2135-2	American Indian or Alaska Native	1002-5	2073
	Arizona	04	21 years	21	Hispanic or Latino	2135-2	Asian or Pacific Islander	A-PI	607
	Arizona	04	21 years	21	Hispanic or Latino	2135-2	Black or African American	2054-5	1153
	Arizona	04	21 years	21	Hispanic or Latino	2135-2	White	2106-3	37511
	Arizona	04	21 years	21	Not Hispanic or Latino	2186-5	American Indian or Alaska Native	1002-5	4728
	Arizona	04	21 years	21	Not Hispanic or Latino	2186-5	Asian or Pacific Islander	A-PI	4329
	Arizona	04	21 years	21	Not Hispanic or Latino	2186-5	Black or African American	2054-5	5833
	Arizona	04	21 years	21	Not Hispanic or Latino	2186-5	White	2106-3	41769
	Arizona	04	22 years	22	Hispanic or Latino	2135-2	American Indian or Alaska Native	1002-5	2107
	Arizona	04	22 years	22	Hispanic or Latino	2135-2	Asian or Pacific Islander	A-PI	616
	Arizona	04	22 years	22	Hispanic or Latino	2135-2	Black or African American	2054-5	1189
	Arizona	04	22 years	22	Hispanic or Latino	2135-2	White	2106-3	37237
	Arizona	04	22 years	22	Not Hispanic or Latino	2186-5	American Indian or Alaska Native	1002-5	4679
	Arizona	04	22 years	22	Not Hispanic or Latino	2186-5	Asian or Pacific Islander	A-PI	4365
	Arizona	04	22 years	22	Not Hispanic or Latino	2186-5	Black or African American	2054-5	6061
	Arizona	04	22 years	22	Not Hispanic or Latino	2186-5	White	2106-3	42513
	Arizona	04	23 years	23	Hispanic or Latino	2135-2	American Indian or Alaska Native	1002-5	1999
	Arizona	04	23 years	23	Hispanic or Latino	2135-2	Asian or Pacific Islander	A-PI	594
	Arizona	04	23 years	23	Hispanic or Latino	2135-2	Black or African American	2054-5	1128
	Arizona	04	23 years	23	Hispanic or Latino	2135-2	White	2106-3	36653
	Arizona	04	23 years	23	Not Hispanic or Latino	2186-5	American Indian or Alaska Native	1002-5	4789
	Arizona	04	23 years	23	Not Hispanic or Latino	2186-5	Asian or Pacific Islander	A-PI	4729
	Arizona	04	23 years	23	Not Hispanic or Latino	2186-5	Black or African American	2054-5	6270
	Arizona	04	23 years	23	Not Hispanic or Latino	2186-5	White	2106-3	44524
	Arizona	04	24 years	24	Hispanic or Latino	2135-2	American Indian or Alaska Native	1002-5	1902
	Arizona	04	24 years	24	Hispanic or Latino	2135-2	Asian or Pacific Islander	A-PI	643
	Arizona	04	24 years	24	Hispanic or Latino	2135-2	Black or African American	2054-5	1119
	Arizona	04	24 years	24	Hispanic or Latino	2135-2	White	2106-3	36637
	Arizona	04	24 years	24	Not Hispanic or Latino	2186-5	American Indian or Alaska Native	1002-5	4775
	Arizona	04	24 years	24	Not Hispanic or Latino	2186-5	Asian or Pacific Islander	A-PI	4726
	Arizona	04	24 years	24	Not Hispanic or Latino	2186-5	Black or African American	2054-5	6364
	Arizona	04	24 years	24	Not Hispanic or Latino	2186-5	White	2106-3	44971
	Arizona	04	25 years	25	Hispanic or Latino	2135-2	American Indian or Alaska Native	1002-5	1921
	Arizona	04	25 years	25	Hispanic or Latino	2135-2	Asian or Pacific Islander	A-PI	627
	Arizona	04	25 years	25	Hispanic or Latino	2135-2	Black or African American	2054-5	1059
	Arizona	04	25 years	25	Hispanic or Latino	2135-2	White	2106-3	36882
	Arizona	04	25 years	25	Not Hispanic or Latino	2186-5	American Indian or Alaska Native	1002-5	5070
	Arizona	04	25 years	25	Not Hispanic or Latino	2186-5	Asian or Pacific Islander	A-PI	4897
	Arizona	04	25 years	25	Not Hispanic or Latino	2186-5	Black or African American	2054-5	6631
	Arizona	04	25 years	25	Not Hispanic or Latino	2186-5	White	2106-3	45715
	Arizona	04	26 years	26	Hispanic or Latino	2135-2	American Indian or Alaska Native	1002-5	1977
	Arizona	04	26 years	26	Hispanic or Latino	2135-2	Asian or Pacific Islander	A-PI	558
	Arizona	04	26 years	26	Hispanic or Latino	2135-2	Black or African American	2054-5	1114
	Arizona	04	26 years	26	Hispanic or Latino	2135-2	White	2106-3	36838
	Arizona	04	26 years	26	Not Hispanic or Latino	2186-5	American Indian or Alaska Native	1002-5	5291
	Arizona	04	26 years	26	Not Hispanic or Latino	2186-5	Asian or Pacific Islander	A-PI	4732
	Arizona	04	26 years	26	Not Hispanic or Latino	2186-5	Black or African American	2054-5	6662
	Arizona	04	26 years	26	Not Hispanic or Latino	2186-5	White	2106-3	45895
	Arizona	04	27 years	27	Hispanic or Latino	2135-2	American Indian or Alaska Native	1002-5	2032
	Arizona	04	27 years	27	Hispanic or Latino	2135-2	Asian or Pacific Islander	A-PI	600
	Arizona	04	27 years	27	Hispanic or Latino	2135-2	Black or African American	2054-5	1194
	Arizona	04	27 years	27	Hispanic or Latino	2135-2	White	2106-3	37262
	Arizona	04	27 years	27	Not Hispanic or Latino	2186-5	American Indian or Alaska Native	1002-5	5369
	Arizona	04	27 years	27	Not Hispanic or Latino	2186-5	Asian or Pacific Islander	A-PI	4876
	Arizona	04	27 years	27	Not Hispanic or Latino	2186-5	Black or African American	2054-5	6923
	Arizona	04	27 years	27	Not Hispanic or Latino	2186-5	White	2106-3	47675
	Arizona	04	28 years	28	Hispanic or Latino	2135-2	American Indian or Alaska Native	1002-5	1919
	Arizona	04	28 years	28	Hispanic or Latino	2135-2	Asian or Pacific Islander	A-PI	591
	Arizona	04	28 years	28	Hispanic or Latino	2135-2	Black or African American	2054-5	1154
	Arizona	04	28 years	28	Hispanic or Latino	2135-2	White	2106-3	35900
	Arizona	04	28 years	28	Not Hispanic or Latino	2186-5	American Indian or Alaska Native	1002-5	5500
	Arizona	04	28 years	28	Not Hispanic or Latino	2186-5	Asian or Pacific Islander	A-PI	4848
	Arizona	04	28 years	28	Not Hispanic or Latino	2186-5	Black or African American	2054-5	6905
	Arizona	04	28 years	28	Not Hispanic or Latino	2186-5	White	2106-3	50643
	Arizona	04	29 years	29	Hispanic or Latino	2135-2	American Indian or Alaska Native	1002-5	1933
	Arizona	04	29 years	29	Hispanic or Latino	2135-2	Asian or Pacific Islander	A-PI	615
	Arizona	04	29 years	29	Hispanic or Latino	2135-2	Black or African American	2054-5	1203
	Arizona	04	29 years	29	Hispanic or Latino	2135-2	White	2106-3	34712
	Arizona	04	29 years	29	Not Hispanic or Latino	2186-5	American Indian or Alaska Native	1002-5	5461
	Arizona	04	29 years	29	Not Hispanic or Latino	2186-5	Asian or Pacific Islander	A-PI	4981
	Arizona	04	29 years	29	Not Hispanic or Latino	2186-5	Black or African American	2054-5	6850
	Arizona	04	29 years	29	Not Hispanic or Latino	2186-5	White	2106-3	50864
	Arizona	04	30 years	30	Hispanic or Latino	2135-2	American Indian or Alaska Native	1002-5	1827
	Arizona	04	30 years	30	Hispanic or Latino	2135-2	Asian or Pacific Islander	A-PI	594
	Arizona	04	30 years	30	Hispanic or Latino	2135-2	Black or African American	2054-5	1161
	Arizona	04	30 years	30	Hispanic or Latino	2135-2	White	2106-3	31811
	Arizona	04	30 years	30	Not Hispanic or Latino	2186-5	American Indian or Alaska Native	1002-5	5088
	Arizona	04	30 years	30	Not Hispanic or Latino	2186-5	Asian or Pacific Islander	A-PI	4960
	Arizona	04	30 years	30	Not Hispanic or Latino	2186-5	Black or African American	2054-5	6411
	Arizona	04	30 years	30	Not Hispanic or Latino	2186-5	White	2106-3	48317
	Arizona	04	31 years	31	Hispanic or Latino	2135-2	American Indian or Alaska Native	1002-5	1674
	Arizona	04	31 years	31	Hispanic or Latino	2135-2	Asian or Pacific Islander	A-PI	558
	Arizona	04	31 years	31	Hispanic or Latino	2135-2	Black or African American	2054-5	1045
	Arizona	04	31 years	31	Hispanic or Latino	2135-2	White	2106-3	31125
	Arizona	04	31 years	31	Not Hispanic or Latino	2186-5	American Indian or Alaska Native	1002-5	4946
	Arizona	04	31 years	31	Not Hispanic or Latino	2186-5	Asian or Pacific Islander	A-PI	4904
	Arizona	04	31 years	31	Not Hispanic or Latino	2186-5	Black or African American	2054-5	5910
	Arizona	04	31 years	31	Not Hispanic or Latino	2186-5	White	2106-3	46564
	Arizona	04	32 years	32	Hispanic or Latino	2135-2	American Indian or Alaska Native	1002-5	1613
	Arizona	04	32 years	32	Hispanic or Latino	2135-2	Asian or Pacific Islander	A-PI	547
	Arizona	04	32 years	32	Hispanic or Latino	2135-2	Black or African American	2054-5	1001
	Arizona	04	32 years	32	Hispanic or Latino	2135-2	White	2106-3	30262
	Arizona	04	32 years	32	Not Hispanic or Latino	2186-5	American Indian or Alaska Native	1002-5	4630
	Arizona	04	32 years	32	Not Hispanic or Latino	2186-5	Asian or Pacific Islander	A-PI	4964
	Arizona	04	32 years	32	Not Hispanic or Latino	2186-5	Black or African American	2054-5	5737
	Arizona	04	32 years	32	Not Hispanic or Latino	2186-5	White	2106-3	45409
	Arizona	04	33 years	33	Hispanic or Latino	2135-2	American Indian or Alaska Native	1002-5	1671
	Arizona	04	33 years	33	Hispanic or Latino	2135-2	Asian or Pacific Islander	A-PI	473
	Arizona	04	33 years	33	Hispanic or Latino	2135-2	Black or African American	2054-5	1040
	Arizona	04	33 years	33	Hispanic or Latino	2135-2	White	2106-3	30524
	Arizona	04	33 years	33	Not Hispanic or Latino	2186-5	American Indian or Alaska Native	1002-5	4412
	Arizona	04	33 years	33	Not Hispanic or Latino	2186-5	Asian or Pacific Islander	A-PI	5091
	Arizona	04	33 years	33	Not Hispanic or Latino	2186-5	Black or African American	2054-5	5637
	Arizona	04	33 years	33	Not Hispanic or Latino	2186-5	White	2106-3	46210
	Arizona	04	34 years	34	Hispanic or Latino	2135-2	American Indian or Alaska Native	1002-5	1572
	Arizona	04	34 years	34	Hispanic or Latino	2135-2	Asian or Pacific Islander	A-PI	503
	Arizona	04	34 years	34	Hispanic or Latino	2135-2	Black or African American	2054-5	1014
	Arizona	04	34 years	34	Hispanic or Latino	2135-2	White	2106-3	30469
	Arizona	04	34 years	34	Not Hispanic or Latino	2186-5	American Indian or Alaska Native	1002-5	4276
	Arizona	04	34 years	34	Not Hispanic or Latino	2186-5	Asian or Pacific Islander	A-PI	5219
	Arizona	04	34 years	34	Not Hispanic or Latino	2186-5	Black or African American	2054-5	5642
	Arizona	04	34 years	34	Not Hispanic or Latino	2186-5	White	2106-3	46403
	Arizona	04	35 years	35	Hispanic or Latino	2135-2	American Indian or Alaska Native	1002-5	1576
	Arizona	04	35 years	35	Hispanic or Latino	2135-2	Asian or Pacific Islander	A-PI	471
	Arizona	04	35 years	35	Hispanic or Latino	2135-2	Black or African American	2054-5	893
	Arizona	04	35 years	35	Hispanic or Latino	2135-2	White	2106-3	29142
	Arizona	04	35 years	35	Not Hispanic or Latino	2186-5	American Indian or Alaska Native	1002-5	4101
	Arizona	04	35 years	35	Not Hispanic or Latino	2186-5	Asian or Pacific Islander	A-PI	5059
	Arizona	04	35 years	35	Not Hispanic or Latino	2186-5	Black or African American	2054-5	5170
	Arizona	04	35 years	35	Not Hispanic or Latino	2186-5	White	2106-3	45468
	Arizona	04	36 years	36	Hispanic or Latino	2135-2	American Indian or Alaska Native	1002-5	1617
	Arizona	04	36 years	36	Hispanic or Latino	2135-2	Asian or Pacific Islander	A-PI	511
	Arizona	04	36 years	36	Hispanic or Latino	2135-2	Black or African American	2054-5	945
	Arizona	04	36 years	36	Hispanic or Latino	2135-2	White	2106-3	29720
	Arizona	04	36 years	36	Not Hispanic or Latino	2186-5	American Indian or Alaska Native	1002-5	4138
	Arizona	04	36 years	36	Not Hispanic or Latino	2186-5	Asian or Pacific Islander	A-PI	5121
	Arizona	04	36 years	36	Not Hispanic or Latino	2186-5	Black or African American	2054-5	5206
	Arizona	04	36 years	36	Not Hispanic or Latino	2186-5	White	2106-3	46472
	Arizona	04	37 years	37	Hispanic or Latino	2135-2	American Indian or Alaska Native	1002-5	1581
	Arizona	04	37 years	37	Hispanic or Latino	2135-2	Asian or Pacific Islander	A-PI	491
	Arizona	04	37 years	37	Hispanic or Latino	2135-2	Black or African American	2054-5	868
	Arizona	04	37 years	37	Hispanic or Latino	2135-2	White	2106-3	29615
	Arizona	04	37 years	37	Not Hispanic or Latino	2186-5	American Indian or Alaska Native	1002-5	3905
	Arizona	04	37 years	37	Not Hispanic or Latino	2186-5	Asian or Pacific Islander	A-PI	5029
	Arizona	04	37 years	37	Not Hispanic or Latino	2186-5	Black or African American	2054-5	5266
	Arizona	04	37 years	37	Not Hispanic or Latino	2186-5	White	2106-3	46856
	Arizona	04	38 years	38	Hispanic or Latino	2135-2	American Indian or Alaska Native	1002-5	1595
	Arizona	04	38 years	38	Hispanic or Latino	2135-2	Asian or Pacific Islander	A-PI	523
	Arizona	04	38 years	38	Hispanic or Latino	2135-2	Black or African American	2054-5	897
	Arizona	04	38 years	38	Hispanic or Latino	2135-2	White	2106-3	29260
	Arizona	04	38 years	38	Not Hispanic or Latino	2186-5	American Indian or Alaska Native	1002-5	3901
	Arizona	04	38 years	38	Not Hispanic or Latino	2186-5	Asian or Pacific Islander	A-PI	4817
	Arizona	04	38 years	38	Not Hispanic or Latino	2186-5	Black or African American	2054-5	5320
	Arizona	04	38 years	38	Not Hispanic or Latino	2186-5	White	2106-3	46739
	Arizona	04	39 years	39	Hispanic or Latino	2135-2	American Indian or Alaska Native	1002-5	1610
	Arizona	04	39 years	39	Hispanic or Latino	2135-2	Asian or Pacific Islander	A-PI	523
	Arizona	04	39 years	39	Hispanic or Latino	2135-2	Black or African American	2054-5	924
	Arizona	04	39 years	39	Hispanic or Latino	2135-2	White	2106-3	30235
	Arizona	04	39 years	39	Not Hispanic or Latino	2186-5	American Indian or Alaska Native	1002-5	3927
	Arizona	04	39 years	39	Not Hispanic or Latino	2186-5	Asian or Pacific Islander	A-PI	4854
	Arizona	04	39 years	39	Not Hispanic or Latino	2186-5	Black or African American	2054-5	5293
	Arizona	04	39 years	39	Not Hispanic or Latino	2186-5	White	2106-3	47342
	Arizona	04	40 years	40	Hispanic or Latino	2135-2	American Indian or Alaska Native	1002-5	1442
	Arizona	04	40 years	40	Hispanic or Latino	2135-2	Asian or Pacific Islander	A-PI	443
	Arizona	04	40 years	40	Hispanic or Latino	2135-2	Black or African American	2054-5	841
	Arizona	04	40 years	40	Hispanic or Latino	2135-2	White	2106-3	27434
	Arizona	04	40 years	40	Not Hispanic or Latino	2186-5	American Indian or Alaska Native	1002-5	3561
	Arizona	04	40 years	40	Not Hispanic or Latino	2186-5	Asian or Pacific Islander	A-PI	4709
	Arizona	04	40 years	40	Not Hispanic or Latino	2186-5	Black or African American	2054-5	4857
	Arizona	04	40 years	40	Not Hispanic or Latino	2186-5	White	2106-3	44520
	Arizona	04	41 years	41	Hispanic or Latino	2135-2	American Indian or Alaska Native	1002-5	1479
	Arizona	04	41 years	41	Hispanic or Latino	2135-2	Asian or Pacific Islander	A-PI	432
	Arizona	04	41 years	41	Hispanic or Latino	2135-2	Black or African American	2054-5	746
	Arizona	04	41 years	41	Hispanic or Latino	2135-2	White	2106-3	27269
	Arizona	04	41 years	41	Not Hispanic or Latino	2186-5	American Indian or Alaska Native	1002-5	3454
	Arizona	04	41 years	41	Not Hispanic or Latino	2186-5	Asian or Pacific Islander	A-PI	4653
	Arizona	04	41 years	41	Not Hispanic or Latino	2186-5	Black or African American	2054-5	4618
	Arizona	04	41 years	41	Not Hispanic or Latino	2186-5	White	2106-3	43004
	Arizona	04	42 years	42	Hispanic or Latino	2135-2	American Indian or Alaska Native	1002-5	1362
	Arizona	04	42 years	42	Hispanic or Latino	2135-2	Asian or Pacific Islander	A-PI	499
	Arizona	04	42 years	42	Hispanic or Latino	2135-2	Black or African American	2054-5	732
	Arizona	04	42 years	42	Hispanic or Latino	2135-2	White	2106-3	27036
	Arizona	04	42 years	42	Not Hispanic or Latino	2186-5	American Indian or Alaska Native	1002-5	3558
	Arizona	04	42 years	42	Not Hispanic or Latino	2186-5	Asian or Pacific Islander	A-PI	4565
	Arizona	04	42 years	42	Not Hispanic or Latino	2186-5	Black or African American	2054-5	4623
	Arizona	04	42 years	42	Not Hispanic or Latino	2186-5	White	2106-3	43360
	Arizona	04	43 years	43	Hispanic or Latino	2135-2	American Indian or Alaska Native	1002-5	1300
	Arizona	04	43 years	43	Hispanic or Latino	2135-2	Asian or Pacific Islander	A-PI	416
	Arizona	04	43 years	43	Hispanic or Latino	2135-2	Black or African American	2054-5	753
	Arizona	04	43 years	43	Hispanic or Latino	2135-2	White	2106-3	26864
	Arizona	04	43 years	43	Not Hispanic or Latino	2186-5	American Indian or Alaska Native	1002-5	3366
	Arizona	04	43 years	43	Not Hispanic or Latino	2186-5	Asian or Pacific Islander	A-PI	4474
	Arizona	04	43 years	43	Not Hispanic or Latino	2186-5	Black or African American	2054-5	4391
	Arizona	04	43 years	43	Not Hispanic or Latino	2186-5	White	2106-3	41682
	Arizona	04	44 years	44	Hispanic or Latino	2135-2	American Indian or Alaska Native	1002-5	1207
	Arizona	04	44 years	44	Hispanic or Latino	2135-2	Asian or Pacific Islander	A-PI	384
	Arizona	04	44 years	44	Hispanic or Latino	2135-2	Black or African American	2054-5	682
	Arizona	04	44 years	44	Hispanic or Latino	2135-2	White	2106-3	27848
	Arizona	04	44 years	44	Not Hispanic or Latino	2186-5	American Indian or Alaska Native	1002-5	3326
	Arizona	04	44 years	44	Not Hispanic or Latino	2186-5	Asian or Pacific Islander	A-PI	4553
	Arizona	04	44 years	44	Not Hispanic or Latino	2186-5	Black or African American	2054-5	4671
	Arizona	04	44 years	44	Not Hispanic or Latino	2186-5	White	2106-3	43932
	Arizona	04	45 years	45	Hispanic or Latino	2135-2	American Indian or Alaska Native	1002-5	1192
	Arizona	04	45 years	45	Hispanic or Latino	2135-2	Asian or Pacific Islander	A-PI	405
	Arizona	04	45 years	45	Hispanic or Latino	2135-2	Black or African American	2054-5	639
	Arizona	04	45 years	45	Hispanic or Latino	2135-2	White	2106-3	26597
	Arizona	04	45 years	45	Not Hispanic or Latino	2186-5	American Indian or Alaska Native	1002-5	3383
	Arizona	04	45 years	45	Not Hispanic or Latino	2186-5	Asian or Pacific Islander	A-PI	4501
	Arizona	04	45 years	45	Not Hispanic or Latino	2186-5	Black or African American	2054-5	4172
	Arizona	04	45 years	45	Not Hispanic or Latino	2186-5	White	2106-3	42946
	Arizona	04	46 years	46	Hispanic or Latino	2135-2	American Indian or Alaska Native	1002-5	1204
	Arizona	04	46 years	46	Hispanic or Latino	2135-2	Asian or Pacific Islander	A-PI	364
	Arizona	04	46 years	46	Hispanic or Latino	2135-2	Black or African American	2054-5	630
	Arizona	04	46 years	46	Hispanic or Latino	2135-2	White	2106-3	25460
	Arizona	04	46 years	46	Not Hispanic or Latino	2186-5	American Indian or Alaska Native	1002-5	3328
	Arizona	04	46 years	46	Not Hispanic or Latino	2186-5	Asian or Pacific Islander	A-PI	4395
	Arizona	04	46 years	46	Not Hispanic or Latino	2186-5	Black or African American	2054-5	4225
	Arizona	04	46 years	46	Not Hispanic or Latino	2186-5	White	2106-3	43454
	Arizona	04	47 years	47	Hispanic or Latino	2135-2	American Indian or Alaska Native	1002-5	1140
	Arizona	04	47 years	47	Hispanic or Latino	2135-2	Asian or Pacific Islander	A-PI	395
	Arizona	04	47 years	47	Hispanic or Latino	2135-2	Black or African American	2054-5	576
	Arizona	04	47 years	47	Hispanic or Latino	2135-2	White	2106-3	24711
	Arizona	04	47 years	47	Not Hispanic or Latino	2186-5	American Indian or Alaska Native	1002-5	3283
	Arizona	04	47 years	47	Not Hispanic or Latino	2186-5	Asian or Pacific Islander	A-PI	4417
	Arizona	04	47 years	47	Not Hispanic or Latino	2186-5	Black or African American	2054-5	4354
	Arizona	04	47 years	47	Not Hispanic or Latino	2186-5	White	2106-3	46589
	Arizona	04	48 years	48	Hispanic or Latino	2135-2	American Indian or Alaska Native	1002-5	1122
	Arizona	04	48 years	48	Hispanic or Latino	2135-2	Asian or Pacific Islander	A-PI	372
	Arizona	04	48 years	48	Hispanic or Latino	2135-2	Black or African American	2054-5	552
	Arizona	04	48 years	48	Hispanic or Latino	2135-2	White	2106-3	24606
	Arizona	04	48 years	48	Not Hispanic or Latino	2186-5	American Indian or Alaska Native	1002-5	3372
	Arizona	04	48 years	48	Not Hispanic or Latino	2186-5	Asian or Pacific Islander	A-PI	4290
	Arizona	04	48 years	48	Not Hispanic or Latino	2186-5	Black or African American	2054-5	4531
	Arizona	04	48 years	48	Not Hispanic or Latino	2186-5	White	2106-3	51408
	Arizona	04	49 years	49	Hispanic or Latino	2135-2	American Indian or Alaska Native	1002-5	1119
	Arizona	04	49 years	49	Hispanic or Latino	2135-2	Asian or Pacific Islander	A-PI	363
	Arizona	04	49 years	49	Hispanic or Latino	2135-2	Black or African American	2054-5	532
	Arizona	04	49 years	49	Hispanic or Latino	2135-2	White	2106-3	24513
	Arizona	04	49 years	49	Not Hispanic or Latino	2186-5	American Indian or Alaska Native	1002-5	3269
	Arizona	04	49 years	49	Not Hispanic or Latino	2186-5	Asian or Pacific Islander	A-PI	4112
	Arizona	04	49 years	49	Not Hispanic or Latino	2186-5	Black or African American	2054-5	4415
	Arizona	04	49 years	49	Not Hispanic or Latino	2186-5	White	2106-3	52407
	Arizona	04	50 years	50	Hispanic or Latino	2135-2	American Indian or Alaska Native	1002-5	1020
	Arizona	04	50 years	50	Hispanic or Latino	2135-2	Asian or Pacific Islander	A-PI	300
	Arizona	04	50 years	50	Hispanic or Latino	2135-2	Black or African American	2054-5	486
	Arizona	04	50 years	50	Hispanic or Latino	2135-2	White	2106-3	22940
	Arizona	04	50 years	50	Not Hispanic or Latino	2186-5	American Indian or Alaska Native	1002-5	3154
	Arizona	04	50 years	50	Not Hispanic or Latino	2186-5	Asian or Pacific Islander	A-PI	3860
	Arizona	04	50 years	50	Not Hispanic or Latino	2186-5	Black or African American	2054-5	4079
	Arizona	04	50 years	50	Not Hispanic or Latino	2186-5	White	2106-3	49649
	Arizona	04	51 years	51	Hispanic or Latino	2135-2	American Indian or Alaska Native	1002-5	970
	Arizona	04	51 years	51	Hispanic or Latino	2135-2	Asian or Pacific Islander	A-PI	293
	Arizona	04	51 years	51	Hispanic or Latino	2135-2	Black or African American	2054-5	425
	Arizona	04	51 years	51	Hispanic or Latino	2135-2	White	2106-3	22699
	Arizona	04	51 years	51	Not Hispanic or Latino	2186-5	American Indian or Alaska Native	1002-5	3172
	Arizona	04	51 years	51	Not Hispanic or Latino	2186-5	Asian or Pacific Islander	A-PI	3579
	Arizona	04	51 years	51	Not Hispanic or Latino	2186-5	Black or African American	2054-5	3929
	Arizona	04	51 years	51	Not Hispanic or Latino	2186-5	White	2106-3	47751
	Arizona	04	52 years	52	Hispanic or Latino	2135-2	American Indian or Alaska Native	1002-5	900
	Arizona	04	52 years	52	Hispanic or Latino	2135-2	Asian or Pacific Islander	A-PI	243
	Arizona	04	52 years	52	Hispanic or Latino	2135-2	Black or African American	2054-5	454
	Arizona	04	52 years	52	Hispanic or Latino	2135-2	White	2106-3	21857
	Arizona	04	52 years	52	Not Hispanic or Latino	2186-5	American Indian or Alaska Native	1002-5	3193
	Arizona	04	52 years	52	Not Hispanic or Latino	2186-5	Asian or Pacific Islander	A-PI	3348
	Arizona	04	52 years	52	Not Hispanic or Latino	2186-5	Black or African American	2054-5	3854
	Arizona	04	52 years	52	Not Hispanic or Latino	2186-5	White	2106-3	47619
	Arizona	04	53 years	53	Hispanic or Latino	2135-2	American Indian or Alaska Native	1002-5	905
	Arizona	04	53 years	53	Hispanic or Latino	2135-2	Asian or Pacific Islander	A-PI	263
	Arizona	04	53 years	53	Hispanic or Latino	2135-2	Black or African American	2054-5	386
	Arizona	04	53 years	53	Hispanic or Latino	2135-2	White	2106-3	21291
	Arizona	04	53 years	53	Not Hispanic or Latino	2186-5	American Indian or Alaska Native	1002-5	3203
	Arizona	04	53 years	53	Not Hispanic or Latino	2186-5	Asian or Pacific Islander	A-PI	3166
	Arizona	04	53 years	53	Not Hispanic or Latino	2186-5	Black or African American	2054-5	3807
	Arizona	04	53 years	53	Not Hispanic or Latino	2186-5	White	2106-3	48911
	Arizona	04	54 years	54	Hispanic or Latino	2135-2	American Indian or Alaska Native	1002-5	937
	Arizona	04	54 years	54	Hispanic or Latino	2135-2	Asian or Pacific Islander	A-PI	296
	Arizona	04	54 years	54	Hispanic or Latino	2135-2	Black or African American	2054-5	433
	Arizona	04	54 years	54	Hispanic or Latino	2135-2	White	2106-3	21286
	Arizona	04	54 years	54	Not Hispanic or Latino	2186-5	American Indian or Alaska Native	1002-5	3482
	Arizona	04	54 years	54	Not Hispanic or Latino	2186-5	Asian or Pacific Islander	A-PI	3188
	Arizona	04	54 years	54	Not Hispanic or Latino	2186-5	Black or African American	2054-5	3958
	Arizona	04	54 years	54	Not Hispanic or Latino	2186-5	White	2106-3	53461
	Arizona	04	55 years	55	Hispanic or Latino	2135-2	American Indian or Alaska Native	1002-5	901
	Arizona	04	55 years	55	Hispanic or Latino	2135-2	Asian or Pacific Islander	A-PI	265
	Arizona	04	55 years	55	Hispanic or Latino	2135-2	Black or African American	2054-5	429
	Arizona	04	55 years	55	Hispanic or Latino	2135-2	White	2106-3	20297
	Arizona	04	55 years	55	Not Hispanic or Latino	2186-5	American Indian or Alaska Native	1002-5	3498
	Arizona	04	55 years	55	Not Hispanic or Latino	2186-5	Asian or Pacific Islander	A-PI	3233
	Arizona	04	55 years	55	Not Hispanic or Latino	2186-5	Black or African American	2054-5	3900
	Arizona	04	55 years	55	Not Hispanic or Latino	2186-5	White	2106-3	55716
	Arizona	04	56 years	56	Hispanic or Latino	2135-2	American Indian or Alaska Native	1002-5	882
	Arizona	04	56 years	56	Hispanic or Latino	2135-2	Asian or Pacific Islander	A-PI	260
	Arizona	04	56 years	56	Hispanic or Latino	2135-2	Black or African American	2054-5	397
	Arizona	04	56 years	56	Hispanic or Latino	2135-2	White	2106-3	19414
	Arizona	04	56 years	56	Not Hispanic or Latino	2186-5	American Indian or Alaska Native	1002-5	3322
	Arizona	04	56 years	56	Not Hispanic or Latino	2186-5	Asian or Pacific Islander	A-PI	3144
	Arizona	04	56 years	56	Not Hispanic or Latino	2186-5	Black or African American	2054-5	3892
	Arizona	04	56 years	56	Not Hispanic or Latino	2186-5	White	2106-3	57315
	Arizona	04	57 years	57	Hispanic or Latino	2135-2	American Indian or Alaska Native	1002-5	871
	Arizona	04	57 years	57	Hispanic or Latino	2135-2	Asian or Pacific Islander	A-PI	232
	Arizona	04	57 years	57	Hispanic or Latino	2135-2	Black or African American	2054-5	373
	Arizona	04	57 years	57	Hispanic or Latino	2135-2	White	2106-3	18761
	Arizona	04	57 years	57	Not Hispanic or Latino	2186-5	American Indian or Alaska Native	1002-5	3226
	Arizona	04	57 years	57	Not Hispanic or Latino	2186-5	Asian or Pacific Islander	A-PI	3008
	Arizona	04	57 years	57	Not Hispanic or Latino	2186-5	Black or African American	2054-5	3894
	Arizona	04	57 years	57	Not Hispanic or Latino	2186-5	White	2106-3	58511
	Arizona	04	58 years	58	Hispanic or Latino	2135-2	American Indian or Alaska Native	1002-5	841
	Arizona	04	58 years	58	Hispanic or Latino	2135-2	Asian or Pacific Islander	A-PI	248
	Arizona	04	58 years	58	Hispanic or Latino	2135-2	Black or African American	2054-5	354
	Arizona	04	58 years	58	Hispanic or Latino	2135-2	White	2106-3	18212
	Arizona	04	58 years	58	Not Hispanic or Latino	2186-5	American Indian or Alaska Native	1002-5	3212
	Arizona	04	58 years	58	Not Hispanic or Latino	2186-5	Asian or Pacific Islander	A-PI	2987
	Arizona	04	58 years	58	Not Hispanic or Latino	2186-5	Black or African American	2054-5	3752
	Arizona	04	58 years	58	Not Hispanic or Latino	2186-5	White	2106-3	60471
	Arizona	04	59 years	59	Hispanic or Latino	2135-2	American Indian or Alaska Native	1002-5	826
	Arizona	04	59 years	59	Hispanic or Latino	2135-2	Asian or Pacific Islander	A-PI	254
	Arizona	04	59 years	59	Hispanic or Latino	2135-2	Black or African American	2054-5	335
	Arizona	04	59 years	59	Hispanic or Latino	2135-2	White	2106-3	18269
	Arizona	04	59 years	59	Not Hispanic or Latino	2186-5	American Indian or Alaska Native	1002-5	3256
	Arizona	04	59 years	59	Not Hispanic or Latino	2186-5	Asian or Pacific Islander	A-PI	2898
	Arizona	04	59 years	59	Not Hispanic or Latino	2186-5	Black or African American	2054-5	3766
	Arizona	04	59 years	59	Not Hispanic or Latino	2186-5	White	2106-3	61309
	Arizona	04	60 years	60	Hispanic or Latino	2135-2	American Indian or Alaska Native	1002-5	780
	Arizona	04	60 years	60	Hispanic or Latino	2135-2	Asian or Pacific Islander	A-PI	256
	Arizona	04	60 years	60	Hispanic or Latino	2135-2	Black or African American	2054-5	322
	Arizona	04	60 years	60	Hispanic or Latino	2135-2	White	2106-3	16706
	Arizona	04	60 years	60	Not Hispanic or Latino	2186-5	American Indian or Alaska Native	1002-5	3130
	Arizona	04	60 years	60	Not Hispanic or Latino	2186-5	Asian or Pacific Islander	A-PI	2707
	Arizona	04	60 years	60	Not Hispanic or Latino	2186-5	Black or African American	2054-5	3675
	Arizona	04	60 years	60	Not Hispanic or Latino	2186-5	White	2106-3	60468
	Arizona	04	61 years	61	Hispanic or Latino	2135-2	American Indian or Alaska Native	1002-5	769
	Arizona	04	61 years	61	Hispanic or Latino	2135-2	Asian or Pacific Islander	A-PI	202
	Arizona	04	61 years	61	Hispanic or Latino	2135-2	Black or African American	2054-5	301
	Arizona	04	61 years	61	Hispanic or Latino	2135-2	White	2106-3	15704
	Arizona	04	61 years	61	Not Hispanic or Latino	2186-5	American Indian or Alaska Native	1002-5	2918
	Arizona	04	61 years	61	Not Hispanic or Latino	2186-5	Asian or Pacific Islander	A-PI	2707
	Arizona	04	61 years	61	Not Hispanic or Latino	2186-5	Black or African American	2054-5	3411
	Arizona	04	61 years	61	Not Hispanic or Latino	2186-5	White	2106-3	61961
	Arizona	04	62 years	62	Hispanic or Latino	2135-2	American Indian or Alaska Native	1002-5	729
	Arizona	04	62 years	62	Hispanic or Latino	2135-2	Asian or Pacific Islander	A-PI	215
	Arizona	04	62 years	62	Hispanic or Latino	2135-2	Black or African American	2054-5	310
	Arizona	04	62 years	62	Hispanic or Latino	2135-2	White	2106-3	15254
	Arizona	04	62 years	62	Not Hispanic or Latino	2186-5	American Indian or Alaska Native	1002-5	2824
	Arizona	04	62 years	62	Not Hispanic or Latino	2186-5	Asian or Pacific Islander	A-PI	2632
	Arizona	04	62 years	62	Not Hispanic or Latino	2186-5	Black or African American	2054-5	3378
	Arizona	04	62 years	62	Not Hispanic or Latino	2186-5	White	2106-3	62322
	Arizona	04	63 years	63	Hispanic or Latino	2135-2	American Indian or Alaska Native	1002-5	721
	Arizona	04	63 years	63	Hispanic or Latino	2135-2	Asian or Pacific Islander	A-PI	197
	Arizona	04	63 years	63	Hispanic or Latino	2135-2	Black or African American	2054-5	288
	Arizona	04	63 years	63	Hispanic or Latino	2135-2	White	2106-3	14296
	Arizona	04	63 years	63	Not Hispanic or Latino	2186-5	American Indian or Alaska Native	1002-5	2716
	Arizona	04	63 years	63	Not Hispanic or Latino	2186-5	Asian or Pacific Islander	A-PI	2585
	Arizona	04	63 years	63	Not Hispanic or Latino	2186-5	Black or African American	2054-5	3231
	Arizona	04	63 years	63	Not Hispanic or Latino	2186-5	White	2106-3	61073
	Arizona	04	64 years	64	Hispanic or Latino	2135-2	American Indian or Alaska Native	1002-5	584
	Arizona	04	64 years	64	Hispanic or Latino	2135-2	Asian or Pacific Islander	A-PI	183
	Arizona	04	64 years	64	Hispanic or Latino	2135-2	Black or African American	2054-5	287
	Arizona	04	64 years	64	Hispanic or Latino	2135-2	White	2106-3	13970
	Arizona	04	64 years	64	Not Hispanic or Latino	2186-5	American Indian or Alaska Native	1002-5	2646
	Arizona	04	64 years	64	Not Hispanic or Latino	2186-5	Asian or Pacific Islander	A-PI	2606
	Arizona	04	64 years	64	Not Hispanic or Latino	2186-5	Black or African American	2054-5	3021
	Arizona	04	64 years	64	Not Hispanic or Latino	2186-5	White	2106-3	61978
	Arizona	04	65 years	65	Hispanic or Latino	2135-2	American Indian or Alaska Native	1002-5	540
	Arizona	04	65 years	65	Hispanic or Latino	2135-2	Asian or Pacific Islander	A-PI	179
	Arizona	04	65 years	65	Hispanic or Latino	2135-2	Black or African American	2054-5	213
	Arizona	04	65 years	65	Hispanic or Latino	2135-2	White	2106-3	12973
	Arizona	04	65 years	65	Not Hispanic or Latino	2186-5	American Indian or Alaska Native	1002-5	2524
	Arizona	04	65 years	65	Not Hispanic or Latino	2186-5	Asian or Pacific Islander	A-PI	2527
	Arizona	04	65 years	65	Not Hispanic or Latino	2186-5	Black or African American	2054-5	2822
	Arizona	04	65 years	65	Not Hispanic or Latino	2186-5	White	2106-3	61596
	Arizona	04	66 years	66	Hispanic or Latino	2135-2	American Indian or Alaska Native	1002-5	461
	Arizona	04	66 years	66	Hispanic or Latino	2135-2	Asian or Pacific Islander	A-PI	140
	Arizona	04	66 years	66	Hispanic or Latino	2135-2	Black or African American	2054-5	191
	Arizona	04	66 years	66	Hispanic or Latino	2135-2	White	2106-3	12269
	Arizona	04	66 years	66	Not Hispanic or Latino	2186-5	American Indian or Alaska Native	1002-5	2322
	Arizona	04	66 years	66	Not Hispanic or Latino	2186-5	Asian or Pacific Islander	A-PI	2481
	Arizona	04	66 years	66	Not Hispanic or Latino	2186-5	Black or African American	2054-5	2613
	Arizona	04	66 years	66	Not Hispanic or Latino	2186-5	White	2106-3	60648
	Arizona	04	67 years	67	Hispanic or Latino	2135-2	American Indian or Alaska Native	1002-5	436
	Arizona	04	67 years	67	Hispanic or Latino	2135-2	Asian or Pacific Islander	A-PI	130
	Arizona	04	67 years	67	Hispanic or Latino	2135-2	Black or African American	2054-5	170
	Arizona	04	67 years	67	Hispanic or Latino	2135-2	White	2106-3	11240
	Arizona	04	67 years	67	Not Hispanic or Latino	2186-5	American Indian or Alaska Native	1002-5	2064
	Arizona	04	67 years	67	Not Hispanic or Latino	2186-5	Asian or Pacific Islander	A-PI	2343
	Arizona	04	67 years	67	Not Hispanic or Latino	2186-5	Black or African American	2054-5	2492
	Arizona	04	67 years	67	Not Hispanic or Latino	2186-5	White	2106-3	60021
	Arizona	04	68 years	68	Hispanic or Latino	2135-2	American Indian or Alaska Native	1002-5	422
	Arizona	04	68 years	68	Hispanic or Latino	2135-2	Asian or Pacific Islander	A-PI	134
	Arizona	04	68 years	68	Hispanic or Latino	2135-2	Black or African American	2054-5	153
	Arizona	04	68 years	68	Hispanic or Latino	2135-2	White	2106-3	10907
	Arizona	04	68 years	68	Not Hispanic or Latino	2186-5	American Indian or Alaska Native	1002-5	2095
	Arizona	04	68 years	68	Not Hispanic or Latino	2186-5	Asian or Pacific Islander	A-PI	2193
	Arizona	04	68 years	68	Not Hispanic or Latino	2186-5	Black or African American	2054-5	2474
	Arizona	04	68 years	68	Not Hispanic or Latino	2186-5	White	2106-3	59350
	Arizona	04	69 years	69	Hispanic or Latino	2135-2	American Indian or Alaska Native	1002-5	372
	Arizona	04	69 years	69	Hispanic or Latino	2135-2	Asian or Pacific Islander	A-PI	111
	Arizona	04	69 years	69	Hispanic or Latino	2135-2	Black or African American	2054-5	150
	Arizona	04	69 years	69	Hispanic or Latino	2135-2	White	2106-3	10483
	Arizona	04	69 years	69	Not Hispanic or Latino	2186-5	American Indian or Alaska Native	1002-5	2000
	Arizona	04	69 years	69	Not Hispanic or Latino	2186-5	Asian or Pacific Islander	A-PI	2240
	Arizona	04	69 years	69	Not Hispanic or Latino	2186-5	Black or African American	2054-5	2404
	Arizona	04	69 years	69	Not Hispanic or Latino	2186-5	White	2106-3	59616
	Arizona	04	70 years	70	Hispanic or Latino	2135-2	American Indian or Alaska Native	1002-5	339
	Arizona	04	70 years	70	Hispanic or Latino	2135-2	Asian or Pacific Islander	A-PI	107
	Arizona	04	70 years	70	Hispanic or Latino	2135-2	Black or African American	2054-5	123
	Arizona	04	70 years	70	Hispanic or Latino	2135-2	White	2106-3	9583
	Arizona	04	70 years	70	Not Hispanic or Latino	2186-5	American Indian or Alaska Native	1002-5	1899
	Arizona	04	70 years	70	Not Hispanic or Latino	2186-5	Asian or Pacific Islander	A-PI	2078
	Arizona	04	70 years	70	Not Hispanic or Latino	2186-5	Black or African American	2054-5	2169
	Arizona	04	70 years	70	Not Hispanic or Latino	2186-5	White	2106-3	60176
	Arizona	04	71 years	71	Hispanic or Latino	2135-2	American Indian or Alaska Native	1002-5	327
	Arizona	04	71 years	71	Hispanic or Latino	2135-2	Asian or Pacific Islander	A-PI	103
	Arizona	04	71 years	71	Hispanic or Latino	2135-2	Black or African American	2054-5	125
	Arizona	04	71 years	71	Hispanic or Latino	2135-2	White	2106-3	9421
	Arizona	04	71 years	71	Not Hispanic or Latino	2186-5	American Indian or Alaska Native	1002-5	1675
	Arizona	04	71 years	71	Not Hispanic or Latino	2186-5	Asian or Pacific Islander	A-PI	1909
	Arizona	04	71 years	71	Not Hispanic or Latino	2186-5	Black or African American	2054-5	1997
	Arizona	04	71 years	71	Not Hispanic or Latino	2186-5	White	2106-3	61230
	Arizona	04	72 years	72	Hispanic or Latino	2135-2	American Indian or Alaska Native	1002-5	286
	Arizona	04	72 years	72	Hispanic or Latino	2135-2	Asian or Pacific Islander	A-PI	105
	Arizona	04	72 years	72	Hispanic or Latino	2135-2	Black or African American	2054-5	111
	Arizona	04	72 years	72	Hispanic or Latino	2135-2	White	2106-3	8804
	Arizona	04	72 years	72	Not Hispanic or Latino	2186-5	American Indian or Alaska Native	1002-5	1720
	Arizona	04	72 years	72	Not Hispanic or Latino	2186-5	Asian or Pacific Islander	A-PI	1763
	Arizona	04	72 years	72	Not Hispanic or Latino	2186-5	Black or African American	2054-5	1876
	Arizona	04	72 years	72	Not Hispanic or Latino	2186-5	White	2106-3	66634
	Arizona	04	73 years	73	Hispanic or Latino	2135-2	American Indian or Alaska Native	1002-5	249
	Arizona	04	73 years	73	Hispanic or Latino	2135-2	Asian or Pacific Islander	A-PI	81
	Arizona	04	73 years	73	Hispanic or Latino	2135-2	Black or African American	2054-5	88
	Arizona	04	73 years	73	Hispanic or Latino	2135-2	White	2106-3	7607
	Arizona	04	73 years	73	Not Hispanic or Latino	2186-5	American Indian or Alaska Native	1002-5	1319
	Arizona	04	73 years	73	Not Hispanic or Latino	2186-5	Asian or Pacific Islander	A-PI	1534
	Arizona	04	73 years	73	Not Hispanic or Latino	2186-5	Black or African American	2054-5	1395
	Arizona	04	73 years	73	Not Hispanic or Latino	2186-5	White	2106-3	47468
	Arizona	04	74 years	74	Hispanic or Latino	2135-2	American Indian or Alaska Native	1002-5	246
	Arizona	04	74 years	74	Hispanic or Latino	2135-2	Asian or Pacific Islander	A-PI	72
	Arizona	04	74 years	74	Hispanic or Latino	2135-2	Black or African American	2054-5	91
	Arizona	04	74 years	74	Hispanic or Latino	2135-2	White	2106-3	7088
	Arizona	04	74 years	74	Not Hispanic or Latino	2186-5	American Indian or Alaska Native	1002-5	1317
	Arizona	04	74 years	74	Not Hispanic or Latino	2186-5	Asian or Pacific Islander	A-PI	1434
	Arizona	04	74 years	74	Not Hispanic or Latino	2186-5	Black or African American	2054-5	1444
	Arizona	04	74 years	74	Not Hispanic or Latino	2186-5	White	2106-3	47207
	Arizona	04	75 years	75	Hispanic or Latino	2135-2	American Indian or Alaska Native	1002-5	191
	Arizona	04	75 years	75	Hispanic or Latino	2135-2	Asian or Pacific Islander	A-PI	67
	Arizona	04	75 years	75	Hispanic or Latino	2135-2	Black or African American	2054-5	87
	Arizona	04	75 years	75	Hispanic or Latino	2135-2	White	2106-3	6535
	Arizona	04	75 years	75	Not Hispanic or Latino	2186-5	American Indian or Alaska Native	1002-5	1217
	Arizona	04	75 years	75	Not Hispanic or Latino	2186-5	Asian or Pacific Islander	A-PI	1374
	Arizona	04	75 years	75	Not Hispanic or Latino	2186-5	Black or African American	2054-5	1324
	Arizona	04	75 years	75	Not Hispanic or Latino	2186-5	White	2106-3	46726
	Arizona	04	76 years	76	Hispanic or Latino	2135-2	American Indian or Alaska Native	1002-5	196
	Arizona	04	76 years	76	Hispanic or Latino	2135-2	Asian or Pacific Islander	A-PI	69
	Arizona	04	76 years	76	Hispanic or Latino	2135-2	Black or African American	2054-5	74
	Arizona	04	76 years	76	Hispanic or Latino	2135-2	White	2106-3	6014
	Arizona	04	76 years	76	Not Hispanic or Latino	2186-5	American Indian or Alaska Native	1002-5	1134
	Arizona	04	76 years	76	Not Hispanic or Latino	2186-5	Asian or Pacific Islander	A-PI	1196
	Arizona	04	76 years	76	Not Hispanic or Latino	2186-5	Black or African American	2054-5	1325
	Arizona	04	76 years	76	Not Hispanic or Latino	2186-5	White	2106-3	48166
	Arizona	04	77 years	77	Hispanic or Latino	2135-2	American Indian or Alaska Native	1002-5	181
	Arizona	04	77 years	77	Hispanic or Latino	2135-2	Asian or Pacific Islander	A-PI	64
	Arizona	04	77 years	77	Hispanic or Latino	2135-2	Black or African American	2054-5	66
	Arizona	04	77 years	77	Hispanic or Latino	2135-2	White	2106-3	5412
	Arizona	04	77 years	77	Not Hispanic or Latino	2186-5	American Indian or Alaska Native	1002-5	1005
	Arizona	04	77 years	77	Not Hispanic or Latino	2186-5	Asian or Pacific Islander	A-PI	1076
	Arizona	04	77 years	77	Not Hispanic or Latino	2186-5	Black or African American	2054-5	1056
	Arizona	04	77 years	77	Not Hispanic or Latino	2186-5	White	2106-3	41228
	Arizona	04	78 years	78	Hispanic or Latino	2135-2	American Indian or Alaska Native	1002-5	119
[truncated: 32,980 more rows]
